# Supplementary material
Source: publisher site journal article supplement (https://www.dovepress.com/article/431628)
Supplement: Supplementary file 1 [file get_supplementary_file.php]

## Additional file 1: Table S1: Clinicopathological characteristics of SLE patients

| Group                  | METTL1 Expression | Label  | Age | Sex    | SLEDAI | Vasculitis | Myositis | Fever | Hypocomplementamis |
|------------------------|-------------------|--------|-----|--------|--------|------------|----------|-------|--------------------|
| High METTL1 expression | 1.802             | SLE-1  | 29  | FEMALE | 6      | NO         | NO       | NO    | NO                 |
| High METTL1 expression | 1.383             | SLE-2  | 32  | MALE   | 10     | YES        | NO       | NO    | YES                |
| High METTL1 expression | 1.31              | SLE-3  | 19  | FEMALE | 8      | NO         | NO       | NO    | NO                 |
| High METTL1 expression | 1.151             | SLE-4  | 18  | FEMALE | 0      | NO         | NO       | NO    | NO                 |
| High METTL1 expression | 1.133             | SLE-5  | 27  | FEMALE | 18     | NO         | NO       | NO    | NO                 |
| High METTL1 expression | 1.091             | SLE-6  | 41  | FEMALE | 2      | NO         | NO       | NO    | NO                 |
| High METTL1 expression | 1.002             | SLE-7  | 38  | FEMALE | 0      | NO         | NO       | NO    | NO                 |
| High METTL1 expression | 0.982             | SLE-8  | 24  | FEMALE | 7      | NO         | NO       | YES   | YES                |
| High METTL1 expression | 0.971             | SLE-9  | 43  | FEMALE | 7      | NO         | NO       | NO    | YES                |
| High METTL1 expression | 0.884             | SLE-10 | 30  | FEMALE | 11     | NO         | NO       | NO    | YES                |
| High METTL1 expression | 0.874             | SLE-11 | 18  | FEMALE | 0      | NO         | NO       | NO    | NO                 |
| High METTL1 expression | 0.862             | SLE-12 | 44  | FEMALE | 4      | NO         | NO       | NO    | NO                 |
| High METTL1 expression | 0.841             | SLE-13 | 49  | FEMALE | 6      | NO         | NO       | NO    | YES                |
| High METTL1 expression | 0.698             | SLE-14 | 21  | FEMALE | 14     | NO         | NO       | YES   | YES                |
| High METTL1 expression | 0.692             | SLE-15 | 34  | FEMALE | 0      | NO         | NO       | NO    | NO                 |
| High METTL1 expression | 0.667             | SLE-16 | 34  | FEMALE | 26     | NO         | NO       | YES   | YES                |
| High METTL1 expression | 0.657             | SLE-17 | 18  | FEMALE | 8      | NO         | NO       | NO    | NO                 |
| High METTL1 expression | 0.644             | SLE-18 | 34  | FEMALE | 9      | NO         | NO       | YES   | YES                |
| High METTL1 expression | 0.63              | SLE-19 | 28  | FEMALE | 2      | NO         | NO       | NO    | YES                |
| High METTL1 expression | 0.611             | SLE-20 | 22  | FEMALE | 9      | NO         | NO       | YES   | YES                |
| High METTL1 expression | 0.599             | SLE-21 | 21  | FEMALE | 0      | NO         | NO       | NO    | NO                 |
| High METTL1 expression | 0.522             | SLE-22 | 28  | FEMALE | 0      | NO         | NO       | NO    | NO                 |
| Low METTL1 expression  | 0.521             | SLE-23 | 39  | FEMALE | 18     | NO         | NO       | YES   | YES                |
| Low METTL1 expression  | 0.499             | SLE-24 | 33  | MALE   | 12     | NO         | NO       | NO    | NO                 |
| Low METTL1 expression  | 0.492             | SLE-25 | 20  | FEMALE | 3      | NO         | NO       | NO    | YES                |
| Low METTL1 expression  | 0.491             | SLE-26 | 19  | FEMALE | 27     | NO         | NO       | YES   | YES                |
| Low METTL1 expression  | 0.487             | SLE-27 | 39  | FEMALE | 8      | NO         | NO       | NO    | YES                |
| Low METTL1 expression  | 0.479             | SLE-28 | 37  | FEMALE | 16     | NO         | NO       | NO    | YES                |
| Low METTL1 expression  | 0.395             | SLE-29 | 55  | MALE   | 9      | NO         | NO       | NO    | YES                |
| Low METTL1 expression  | 0.394             | SLE-30 | 18  | MALE   | 54     | YES        | YES      | YES   | YES                |
| Low METTL1 expression  | 0.385             | SLE-31 | 21  | FEMALE | 4      | NO         | NO       | NO    | NO                 |
| Low METTL1 expression  | 0.381             | SLE-32 | 41  | MALE   | 0      | NO         | NO       | NO    | NO                 |
| Low METTL1 expression  | 0.288             | SLE-33 | 29  | FEMALE | 3      | NO         | NO       | YES   | YES                |
| Low METTL1 expression  | 0.283             | SLE-34 | 36  | FEMALE | 1      | NO         | NO       | NO    | NO                 |
| Low METTL1 expression  | 0.28              | SLE-35 | 54  | FEMALE | 12     | NO         | NO       | NO    | NO                 |
| Low METTL1 expression  | 0.27              | SLE-36 | 20  | FEMALE | 33     | YES        | NO       | YES   | YES                |
| Low METTL1 expression  | 0.268             | SLE-37 | 38  | FEMALE | 8      | NO         | NO       | NO    | YES                |
| Low METTL1 expression  | 0.26              | SLE-38 | 57  | FEMALE | 1      | NO         | NO       | NO    | NO                 |
| Low METTL1 expression  | 0.254             | SLE-39 | 48  | FEMALE | 8      | YES        | NO       | NO    | NO                 |
| Low METTL1 expression  | 0.252             | SLE-40 | 37  | FEMALE | 12     | NO         | NO       | NO    | YES                |
| Low METTL1 expression  | 0.24              | SLE-41 | 33  | FEMALE | 14     | NO         | NO       | NO    | YES                |
| Low METTL1 expression  | 0.236             | SLE-42 | 29  | FEMALE | 15     | NO         | NO       | YES   | YES                |
| Low METTL1 expression  | 0.222             | SLE-43 | 23  | FEMALE | 39     | YES        | NO       | YES   | YES                |
| Low METTL1 expression  | 0.215             | SLE-44 | 68  | FEMALE | 0      | NO         | NO       | NO    | NO                 |
| Low METTL1 expression  | 0.162             | SLE-45 | 35  | FEMALE | 14     | NO         | NO       | NO    | YES                |



| Skin rash | C3    | C4     | IgM   | IgA   | IgG  | dsDNA | anti-SSA | anti-SSB | anti-Sm | anti-nRNP | anti-rRNP | AauA | anti-Histone |
|-----------|-------|--------|-------|-------|------|-------|----------|----------|---------|-----------|-----------|------|--------------|
| NO        | 1.06  | 0.217  | 0.599 | 1.97  | 12.1 | -     | +        | +        | -       | -         | -         | -    | -            |
| NO        | 0.663 | 0.088  | 0.491 | 4.16  | 18.9 | -     | -        | -        | +       | +         | -         | -    | -            |
| NO        | 1.15  | 0.154  | 0.985 | 2.65  | 4.21 | -     | +        | -        | -       | -         | -         | -    | -            |
| NO        | 1.02  | 0.179  | 1.03  | 2.05  | 11.4 | -     | -        | -        | -       | +         | -         | -    | -            |
| YES       | 0.813 | 0.354  | 1.8   | 1.77  | 9.46 | -     | +++      | -        | ++      | +++       | -         | -    | -            |
| YES       | 0.97  | 0.19   | 0.6   | 1.84  | 8.64 | -     | +        | -        | -       | +         | -         | -    | -            |
| NO        | 0.723 | 0.129  | 0.276 | 1.99  | 9.23 | -     | -        | -        | -       | +         | -         | -    | -            |
| NO        | 0.568 | 0.033  | 2.43  | 2.26  | 23.7 | -     | +        | -        | -       | -         | +         | -    | -            |
| NO        | 0.396 | 0.026  | 1.25  | 2.99  | 14.1 | -     | +        | -        | -       | -         | ++        | +    | ++           |
| YES       | 0.174 | 0.024  | 1.12  | 2.31  | 16.9 | -     | -        | -        | -       | -         | -         | -    | -            |
| NO        | 0.762 | 0.04   | 0.705 | 2.79  | 14.8 | -     | +        | -        | -       | -         | -         | -    | -            |
| NO        | 1.17  | 0.192  | 0.902 | 2.87  | 14.8 | -     | -        | -        | -       | +++       | -         | -    | -            |
| NO        | 0.51  | 0.173  | 1.58  | 1.24  | 6.33 | -     | +++      | -        | -       | -         | -         | -    | -            |
| NO        | 0.343 | 0.067  | 1.91  | 2.6   | 13.8 | ++    | -        | -        | -       | -         | -         | ++   | -            |
| NO        | 0.865 | 0.169  | 1.56  | 3.1   | 11.2 | -     | -        | -        | +       | +         | +         | -    | -            |
| NO        | 0.701 | 0.073  | 2.27  | 3.65  | 11.9 | -     | +++      | -        | -       | -         | -         | -    | -            |
| YES       | 0.812 | 0.104  | 1.38  | 2.79  | 10.5 | -     | -        | -        | +       | +         | +         | -    | -            |
| NO        | 0.732 | 0.039  | 0.745 | 2.17  | 10   | -     | -        | -        | -       | -         | -         | -    | -            |
| NO        | 0.57  | 0.074  | 0.693 | 3.14  | 10.8 | -     | -        | -        | -       | -         | +         | -    | +            |
| YES       | 0.532 | 0.041  | 0.736 | 1.76  | 14.3 | -     | -        | -        | -       | -         | ++        | -    | -            |
| NO        | 1.07  | 0.157  | 1.57  | 1.33  | 11   | -     | -        | -        | -       | -         | -         | -    | -            |
| NO        | 0.993 | 0.192  | 0.703 | 1.8   | 10.4 | -     | +        | -        | -       | -         | -         | -    | +            |
| YES       | 0.489 | 0.069  | 0.485 | 2.68  | 14.8 | +++   | ++       | -        | -       | -         | -         | ++   | ++           |
| NO        | 1.08  | 0.301  | 0.699 | 3.81  | 14.2 | -     | -        | -        | ++      | +++       | -         | -    | -            |
| NO        | 0.626 | 0.138  | 1.21  | 2.42  | 9.66 | -     | +        | -        | -       | +         | +         | -    | -            |
| NO        | 0.3   | 0.0322 | 1.46  | 2.07  | 22.4 | +     | -        | -        | -       | -         | -         | +    | +            |
| NO        | 0.63  | 0.137  | 0.289 | 1.86  | 8.74 | +     | +        | -        | -       | -         | -         | +    | -            |
| YES       | 0.432 | 0.0206 | 0.387 | 4.12  | 18.9 | +     | -        | -        | +       | +         | +         | +    | +            |
| YES       | 0.206 | 0.0258 | 0.854 | 5.79  | 16.5 | +     | +        | -        | +       | +         | -         | -    | -            |
| YES       | 0.317 | 0.0423 | 0.423 | 2.02  | 16.6 | -     | -        | -        | +       | +         | +         | -    | -            |
| NO        | 0.752 | 0.162  | 0.405 | 1.56  | 9.74 | -     | -        | -        | -       | -         | +         | -    | -            |
| NO        | 1.07  | 0.182  | 0.4   | 0.548 | 4.46 | -     | -        | -        | -       | -         | -         | -    | -            |
| NO        | 0.996 | 0.234  | 0.321 | 3.86  | 8.33 | -     | -        | -        | ++      | +++       | -         | +    | -            |
| NO        | 1.01  | 0.151  | 1.03  | 1.36  | 11.5 | -     | -        | -        | -       | -         | -         | -    | -            |
| NO        | 0.964 | 0.25   | 0.816 | 2.28  | 10.6 | -     | -        | -        | +       | +++       | -         | -    | -            |
| NO        | 0.406 | 0.068  | 1.43  | 3.01  | 26.9 | -     | +        | -        | +       | +         | +         | -    | -            |
| YES       | 0.637 | 0.212  | 0.506 | 1.25  | 12.8 | -     | +        | -        | -       | -         | -         | -    | -            |
| NO        | 0.817 | 0.146  | 0.651 | 3.5   | 26.5 | -     | +        | +        | -       | -         | -         | +    | +            |
| NO        | 1.34  | 0.264  | 0.961 | 2.08  | 10.6 | -     | +        | -        | +       | +         | +         | +    | +            |
| YES       | 0.672 | 0.11   | 2.01  | 3.06  | 6    | -     | +        | -        | -       | +         | ++        | -    | -            |
| NO        | 0.608 | 0.154  | 0.585 | 2.19  | 6.79 | -     | +        | -        | -       | -         | -         | -    | -            |
| NO        | 0.375 | 0.052  | 0.412 | 4.08  | 11.4 | -     | -        | -        | +       | +         | +         | +    | -            |
| YES       | 0.05  | 0.017  | 1.42  | 2.16  | 16.7 | +     | +        | -        | -       | -         | -         | ++   | -            |
| NO        | 0.735 | 0.138  | 0.894 | 2.81  | 12.7 | -     | -        | -        | -       | -         | -         | -    | -            |
| YES       | 0.446 | 0.0697 | 1.66  | 2.54  | 31.7 | +     | -        | -        | +       | +         | -         | -    | -            |



CD4+/CD8+

1.32

1.68

1.31

0.91

1.07

1.89

0.99

0.73

0.43

1.49

1.42

0.6

0.7

1.32

### Additional file 1: Table S1: Characteristics of healthy controls

| Label | Age | Sex    | METTL1 Expression |
|-------|-----|--------|-------------------|
| HC-1  | 24  | Female | 0.681             |
| HC-2  | 25  | Female | 0.569             |
| HC-3  | 26  | Female | 0.480             |
| HC-4  | 24  | Female | 0.449             |
| HC-5  | 24  | Female | 0.498             |
| HC-6  | 23  | Male   | 1.003             |
| HC-7  | 22  | Female | 1.630             |
| HC-8  | 30  | Female | 0.456             |
| HC-9  | 28  | Female | 2.257             |
| HC-10 | 31  | Female | 1.918             |
| HC-11 | 36  | Female | 0.371             |
| HC-12 | 32  | Female | 1.283             |
| HC-13 | 33  | Female | 0.698             |
| HC-14 | 35  | Female | 2.532             |
| HC-15 | 39  | Male   | 1.688             |
| HC-16 | 32  | Female | 0.576             |
| HC-17 | 48  | Female | 0.386             |
| HC-18 | 35  | Female | 0.526             |

## Additional file 2: Table S2: METTL1-coexpressed genes in dataset

| GENE1    | GENE2  | P           | R            |
|----------|--------|-------------|--------------|
| TSPAN6   | METTL1 | 0.00771896  | 0.577093188  |
| DPM1     | METTL1 | 1.01E-04    | 0.759984862  |
| FGR      | METTL1 | 0.017731005 | -0.523940121 |
| NFYA     | METTL1 | 0.005857394 | 0.592988366  |
| STPG1    | METTL1 | 0.013659973 | 0.541533763  |
| LAS1L    | METTL1 | 0.007154614 | 0.581545286  |
| CYP51A1  | METTL1 | 0.020706337 | 0.51303471   |
| CD99     | METTL1 | 0.004186864 | -0.611304965 |
| LASP1    | METTL1 | 0.017092991 | -0.526467029 |
| PLXND1   | METTL1 | 0.001183455 | -0.671631444 |
| PDK4     | METTL1 | 0.047516966 | -0.44814689  |
| CDC27    | METTL1 | 0.001383064 | 0.664844006  |
| SKAP2    | METTL1 | 0.021566207 | -0.510116912 |
| ACSM3    | METTL1 | 0.047977316 | 0.447321149  |
| CIAPIN1  | METTL1 | 0.029577576 | 0.486603187  |
| FAM214B  | METTL1 | 8.01E-04    | -0.687919594 |
| COPZ2    | METTL1 | 0.016723652 | -0.527964529 |
| ABCB4    | METTL1 | 0.004932166 | 0.602502191  |
| KMT2E    | METTL1 | 0.003286935 | 0.623861485  |
| MYCBP2   | METTL1 | 0.001235386 | 0.66977802   |
| FBXL3    | METTL1 | 0.002631174 | 0.634961767  |
| LAMP2    | METTL1 | 0.018954726 | -0.519290249 |
| GGNBP2   | METTL1 | 0.00951357  | 0.56450988   |
| GDE1     | METTL1 | 1.36E-04    | -0.750889428 |
| CRLF1    | METTL1 | 0.021582587 | 0.510062236  |
| CACNG3   | METTL1 | 5.50E-06    | 0.8316513    |
| AP2B1    | METTL1 | 0.019188796 | 0.518428305  |
| SPATA20  | METTL1 | 0.045174409 | -0.452446647 |
| MAP3K9   | METTL1 | 0.006940592 | 0.583309108  |
| RALA     | METTL1 | 0.036101926 | 0.470927135  |
| ALDH3B1  | METTL1 | 0.00220382  | -0.643512875 |
| GGCT     | METTL1 | 0.00203793  | 0.647209707  |
| DBF4     | METTL1 | 2.59E-05    | 0.796982524  |
| IFRD1    | METTL1 | 0.002056237 | 0.646789639  |
| GTF2IRD1 | METTL1 | 0.013935207 | 0.540219826  |
| PAF1     | METTL1 | 0.001688824 | 0.655895713  |
| ARSD     | METTL1 | 6.08E-04    | -0.698810984 |
| MARK4    | METTL1 | 6.82E-04    | -0.69431773  |
| GAS7     | METTL1 | 0.001038387 | -0.677198519 |
| MATK     | METTL1 | 0.002731469 | -0.633124496 |
| CD79B    | METTL1 | 7.80E-04    | 0.688982867  |
| SCN4A    | METTL1 | 0.008801202 | 0.569251815  |
| ST7L     | METTL1 | 0.027518275 | 0.492113932  |
| RPUSD1   | METTL1 | 0.002571172 | -0.636088996 |
| NOX1     | METTL1 | 0.015476715 | 0.533224461  |
| PSMB1    | METTL1 | 0.009582701 | 0.564065253  |
| CDK11A   | METTL1 | 0.044236645 | 0.454216074  |
| NADK     | METTL1 | 0.011603409 | -0.552093344 |
| SYPL1    | METTL1 | 1.11E-04    | 0.75709405   |
| CELSR3   | METTL1 | 0.004148524 | 0.611791888  |

|          |        |             |              |
|----------|--------|-------------|--------------|
| SS18L2   | METTL1 | 1.29E-04    | 0.752663309  |
| ST3GAL1  | METTL1 | 0.03587301  | 0.471438051  |
| IL32     | METTL1 | 0.019128613 | 0.518649121  |
| MAPK8IP2 | METTL1 | 0.036713982 | -0.469573365 |
| HEATR5B  | METTL1 | 0.029453037 | 0.486927745  |
| RPS20    | METTL1 | 4.52E-05    | 0.782705276  |
| CSDE1    | METTL1 | 1.24E-04    | 0.753737507  |
| REV3L    | METTL1 | 0.038429243 | 0.465870741  |
| IYD      | METTL1 | 0.01965147  | 0.51674892   |
| RANBP9   | METTL1 | 0.001033549 | 0.677395263  |
| DYRK4    | METTL1 | 0.006785788 | 0.584612881  |
| UQCRC1   | METTL1 | 0.040319655 | -0.461935709 |
| IFFO1    | METTL1 | 9.27E-04    | -0.681957089 |
| STAB1    | METTL1 | 0.003173749 | -0.62563718  |
| HIVEP2   | METTL1 | 0.002417356 | 0.639082229  |
| FMO1     | METTL1 | 0.008932559 | 0.568354488  |
| TSPAN9   | METTL1 | 0.041797317 | -0.45895816  |
| AKAP8L   | METTL1 | 0.001449789 | 0.662758863  |
| UTP18    | METTL1 | 0.005413998 | 0.597380149  |
| LARS2    | METTL1 | 0.049428141 | 0.444757905  |
| ERCC1    | METTL1 | 0.049267892 | -0.44503817  |
| CD22     | METTL1 | 0.003582305 | 0.619455909  |
| EXTL3    | METTL1 | 0.002344741 | -0.64055088  |
| ELOVL5   | METTL1 | 0.001156166 | 0.672633     |
| UBR7     | METTL1 | 0.029076593 | 0.487915379  |
| MAP4K5   | METTL1 | 1.96E-04    | 0.739255221  |
| PSMC4    | METTL1 | 0.029700777 | 0.486283172  |
| SLC7A14  | METTL1 | 0.002557401 | 0.636350803  |
| CLDN11   | METTL1 | 3.61E-04    | 0.718243352  |
| NUB1     | METTL1 | 0.013106385 | 0.544242511  |
| PGM3     | METTL1 | 0.027644368 | 0.491767344  |
| CLK1     | METTL1 | 0.002437639 | 0.638678595  |
| POLR3B   | METTL1 | 0.029437382 | 0.486968619  |
| HEBP1    | METTL1 | 0.023353931 | -0.504334719 |
| ZC3H3    | METTL1 | 0.015940391 | -0.531230139 |
| ACPP     | METTL1 | 2.02E-04    | -0.738257067 |
| MDH1     | METTL1 | 0.003859979 | 0.615581048  |
| SLC30A9  | METTL1 | 0.01516109  | 0.534609622  |
| ZMYND11  | METTL1 | 0.001428296 | 0.663421542  |
| WAS      | METTL1 | 0.002245282 | -0.642625342 |
| MATR3    | METTL1 | 1.17E-05    | 0.815646982  |
| NUDCD3   | METTL1 | 2.89E-04    | 0.726145364  |
| SLC38A5  | METTL1 | 0.04829653  | 0.446752129  |
| MAGIX    | METTL1 | 0.033788788 | -0.476210694 |
| SLC11A1  | METTL1 | 0.016473687 | -0.528993124 |
| CXorf56  | METTL1 | 1.00E-04    | 0.76027372   |
| TTC27    | METTL1 | 9.66E-06    | 0.819884592  |
| ZNF582   | METTL1 | 0.01669671  | 0.528074796  |
| VSIG2    | METTL1 | 0.018322788 | -0.521660506 |
| HGF      | METTL1 | 0.02255981  | -0.506858252 |
| ZRANB1   | METTL1 | 0.002451864 | 0.638397171  |
| MNAT1    | METTL1 | 0.009734245 | 0.563099634  |
| RUNX3    | METTL1 | 0.019235182 | -0.51825849  |
| PLEKHB1  | METTL1 | 0.013872172 | 0.540518889  |



|           |        |             |              |
|-----------|--------|-------------|--------------|
| NRXN3     | METTL1 | 0.026171221 | 0.495896912  |
| OSBPL5    | METTL1 | 0.012285251 | -0.548435673 |
| CPS1      | METTL1 | 0.043651065 | 0.455335689  |
| ZDHHC6    | METTL1 | 0.005186285 | 0.599751883  |
| RNH1      | METTL1 | 0.012458075 | -0.547534728 |
| RB1CC1    | METTL1 | 0.033660752 | 0.476511293  |
| BIRC3     | METTL1 | 3.64E-09    | 0.928339913  |
| AKAP11    | METTL1 | 0.022028773 | 0.508585353  |
| SNAPC1    | METTL1 | 3.28E-04    | 0.721697524  |
| STRAP     | METTL1 | 0.001334651 | 0.666410517  |
| ABCC2     | METTL1 | 9.26E-04    | 0.681979571  |
| PLEKHO1   | METTL1 | 0.003557323 | -0.619816615 |
| CCDC28A   | METTL1 | 0.006326673 | 0.588628515  |
| HSF2      | METTL1 | 0.025817202 | 0.496916538  |
| NR1H3     | METTL1 | 0.021816727 | -0.509284238 |
| SEC63     | METTL1 | 0.012748257 | 0.546044443  |
| VIM       | METTL1 | 6.20E-04    | -0.698108939 |
| AGPAT4    | METTL1 | 0.01377239  | -0.540994541 |
| MIPEP     | METTL1 | 3.82E-04    | 0.716258216  |
| TNFRSF1B  | METTL1 | 0.033064483 | -0.477923073 |
| BCLAF1    | METTL1 | 0.005988407 | 0.591743121  |
| TFB1M     | METTL1 | 0.02394817  | 0.50249048   |
| RABEP1    | METTL1 | 4.99E-04    | 0.706363841  |
| NUP160    | METTL1 | 5.23E-04    | 0.704614496  |
| IKZF2     | METTL1 | 0.004027616 | 0.613352219  |
| GRN       | METTL1 | 0.033542617 | -0.476789439 |
| FAM13B    | METTL1 | 0.005521482 | 0.59628909   |
| ARHGAP31  | METTL1 | 0.003538902 | -0.620083936 |
| SARS      | METTL1 | 0.034770446 | 0.473935037  |
| ARID4A    | METTL1 | 2.62E-05    | 0.796755982  |
| PNPLA6    | METTL1 | 0.002114637 | -0.645470201 |
| IFT88     | METTL1 | 0.022395065 | 0.507390572  |
| ABCF2     | METTL1 | 0.04101161  | 0.460531066  |
| CHPF2     | METTL1 | 0.01933439  | -0.517896386 |
| FUT8      | METTL1 | 0.014491593 | 0.537626284  |
| GAB2      | METTL1 | 0.009795361 | -0.562713672 |
| MAP2K3    | METTL1 | 4.34E-04    | -0.711566548 |
| TMSB10    | METTL1 | 0.002269023 | 0.642123294  |
| ASTE1     | METTL1 | 0.001403321 | 0.664202205  |
| RNF19A    | METTL1 | 0.003754056 | 0.617031047  |
| PEX3      | METTL1 | 0.026423598 | 0.495176652  |
| GABARAPL2 | METTL1 | 4.36E-04    | 0.711416088  |
| SH3YL1    | METTL1 | 8.06E-04    | 0.687640053  |
| VCL       | METTL1 | 0.004804461 | -0.603928728 |
| STAP1     | METTL1 | 8.52E-05    | 0.765026207  |
| TIMP2     | METTL1 | 0.006407372 | -0.587905732 |
| RFC1      | METTL1 | 0.002061115 | 0.646678239  |
| ZZZ3      | METTL1 | 5.23E-07    | 0.872644579  |
| METTL1    | METTL1 | 0           | 1            |
| MAT2B     | METTL1 | 0.018290185 | 0.521784551  |
| MSR1      | METTL1 | 0.036517965 | -0.470004999 |
| SOX30     | METTL1 | 0.041241453 | 0.46006855   |
| BEST2     | METTL1 | 0.01304795  | -0.544533793 |
| PHLPP2    | METTL1 | 0.012639289 | 0.546600822  |

|          |        |             |              |
|----------|--------|-------------|--------------|
| PQLC2    | METTL1 | 0.001854571 | -0.651601133 |
| RAB27B   | METTL1 | 0.011238346 | -0.554123738 |
| PARP3    | METTL1 | 0.03358436  | 0.476691069  |
| TDP1     | METTL1 | 2.01E-05    | 0.803212099  |
| MED17    | METTL1 | 7.29E-04    | 0.691684066  |
| AP2S1    | METTL1 | 0.00858769  | -0.570733932 |
| ZBPB     | METTL1 | 0.002602697 | 0.63549404   |
| CNTLN    | METTL1 | 0.021802916 | -0.509329942 |
| OFD1     | METTL1 | 0.015025308 | 0.535212653  |
| PREX2    | METTL1 | 0.016135649 | -0.530404223 |
| ATP6V1H  | METTL1 | 0.047976766 | 0.447322132  |
| FAM214A  | METTL1 | 6.14E-04    | 0.698436992  |
| TPR      | METTL1 | 0.005055381 | 0.601154416  |
| DTNBP1   | METTL1 | 0.032560717 | 0.47913142   |
| SCML1    | METTL1 | 0.019233311 | 0.518265333  |
| ARHGAP6  | METTL1 | 0.029296264 | -0.487337841 |
| GOPC     | METTL1 | 0.001273777 | 0.668449533  |
| HDAC9    | METTL1 | 0.018342388 | 0.521586018  |
| NOP16    | METTL1 | 0.001493469 | 0.661437115  |
| RRM2B    | METTL1 | 0.001766023 | 0.653853464  |
| SNX29    | METTL1 | 0.003349611 | 0.622899946  |
| RSF1     | METTL1 | 0.003687231 | 0.617963371  |
| FAM120A  | METTL1 | 0.022268879 | -0.507800405 |
| COL9A2   | METTL1 | 0.03028852  | -0.484770684 |
| H6PD     | METTL1 | 0.019640336 | -0.516788962 |
| VAMP3    | METTL1 | 0.035333212 | -0.472652952 |
| LTBP1    | METTL1 | 0.028667521 | -0.48900007  |
| FOXP3    | METTL1 | 0.007071998 | 0.582220958  |
| HEXB     | METTL1 | 0.01462832  | -0.537001236 |
| LETMD1   | METTL1 | 0.021412288 | 0.510632327  |
| LAMC3    | METTL1 | 0.028647856 | 0.489052521  |
| FAM160A2 | METTL1 | 0.013462284 | -0.542490733 |
| HERPUD1  | METTL1 | 0.016210781 | 0.530088558  |
| HOMER3   | METTL1 | 0.005660714 | -0.594901461 |
| CYBA     | METTL1 | 5.59E-04    | -0.702059414 |
| TTC17    | METTL1 | 0.04886564  | 0.445744769  |
| AKR7A2   | METTL1 | 0.001164273 | -0.672333403 |
| MRTO4    | METTL1 | 5.73E-04    | 0.701104448  |
| NNAT     | METTL1 | 0.008703461 | -0.56992662  |
| USE1     | METTL1 | 8.13E-06    | 0.823581775  |
| LAMA3    | METTL1 | 1.57E-04    | 0.746314684  |
| ANAPC4   | METTL1 | 0.009653712 | 0.56361125   |
| KCNQ1    | METTL1 | 0.011581752 | -0.55221234  |
| ARID4B   | METTL1 | 5.62E-05    | 0.776793899  |
| FOXC1    | METTL1 | 0.043559555 | -0.455511699 |
| ATP9A    | METTL1 | 0.014804132 | -0.53620438  |
| RELT     | METTL1 | 0.020440946 | -0.513954715 |
| NOP58    | METTL1 | 1.48E-06    | 0.85607155   |
| CYFIP2   | METTL1 | 9.80E-04    | 0.679632677  |
| TAB2     | METTL1 | 4.28E-04    | 0.712131031  |
| USP36    | METTL1 | 0.019244352 | 0.518224955  |
| PUM2     | METTL1 | 0.016996922 | 0.526854029  |
| MRPL43   | METTL1 | 0.04002901  | 0.462531279  |
| ITIH4    | METTL1 | 0.007273444 | 0.580584546  |

|          |        |             |              |
|----------|--------|-------------|--------------|
| ZFR      | METTL1 | 0.005865541 | 0.592910272  |
| TRAF3IP2 | METTL1 | 2.34E-04    | 0.733426275  |
| ATG5     | METTL1 | 3.80E-04    | 0.716401234  |
| MTA3     | METTL1 | 0.015122659 | 0.534779859  |
| USP13    | METTL1 | 0.047347786 | 0.448451894  |
| CDK14    | METTL1 | 0.005819696 | 0.593350915  |
| RIOK2    | METTL1 | 0.031342528 | 0.482115015  |
| DGKG     | METTL1 | 0.001341528 | -0.666185138 |
| FLYWCH1  | METTL1 | 0.036708116 | -0.469586256 |
| TBXAS1   | METTL1 | 0.005856677 | -0.592995246 |
| OGFR     | METTL1 | 9.54E-04    | -0.680731985 |
| GNA15    | METTL1 | 0.008004827 | -0.574938796 |
| RIMBP2   | METTL1 | 0.001434956 | 0.663215329  |
| BCAT1    | METTL1 | 0.040548098 | -0.46146993  |
| WNT8A    | METTL1 | 0.031185558 | 0.482506037  |
| SPAG4    | METTL1 | 0.012097637 | 0.549425395  |
| MRPS35   | METTL1 | 6.42E-04    | 0.696703317  |
| GPBP1    | METTL1 | 8.63E-05    | 0.764638554  |
| MRPS24   | METTL1 | 0.005419412 | 0.597324767  |
| VMP1     | METTL1 | 0.031504423 | -0.481713327 |
| APPBP2   | METTL1 | 0.014347622 | 0.538289596  |
| SPHK2    | METTL1 | 0.022726883 | -0.506321548 |
| RPL18    | METTL1 | 0.002844975 | 0.63111181   |
| CA11     | METTL1 | 0.002929672 | 0.629653087  |
| EPN1     | METTL1 | 1.25E-04    | -0.753634055 |
| RNF4     | METTL1 | 0.022136565 | 0.508232126  |
| TSPAN32  | METTL1 | 0.038107014 | -0.466556385 |
| ST3GAL6  | METTL1 | 0.030798611 | -0.48347657  |
| LPAR2    | METTL1 | 0.0245347   | -0.50070535  |
| CTSA     | METTL1 | 5.94E-04    | -0.699717611 |
| SNX24    | METTL1 | 0.038050002 | -0.466678165 |
| DDX20    | METTL1 | 4.11E-04    | 0.713611314  |
| CHI3L2   | METTL1 | 0.035709794 | 0.471803884  |
| PMS1     | METTL1 | 0.028587512 | 0.489213643  |
| HMG20B   | METTL1 | 0.004096042 | -0.612464494 |
| TAF11    | METTL1 | 1.32E-04    | 0.7517596    |
| AP3D1    | METTL1 | 0.044873184 | -0.453011908 |
| SLC9A3R2 | METTL1 | 0.031654179 | -0.481343196 |
| GNAI3    | METTL1 | 0.038969705 | 0.464730688  |
| IPO5     | METTL1 | 0.024347248 | 0.50127216   |
| WDR3     | METTL1 | 1.44E-05    | 0.81090996   |
| DGKA     | METTL1 | 0.002093458 | 0.645945134  |
| KARS     | METTL1 | 0.002690867 | 0.633861381  |
| NDUFB4   | METTL1 | 0.013167517 | 0.543938904  |
| ZC3H15   | METTL1 | 1.28E-04    | 0.752829647  |
| PRKCQ    | METTL1 | 1.87E-04    | 0.740761955  |
| ASB1     | METTL1 | 0.012752645 | 0.54602212   |
| FAM107B  | METTL1 | 4.15E-04    | 0.713219997  |
| PDE4A    | METTL1 | 2.98E-04    | -0.725039431 |
| DIP2B    | METTL1 | 0.026954477 | 0.493679105  |
| SMARCD1  | METTL1 | 0.030223643 | 0.484936502  |
| ELOVL1   | METTL1 | 0.038435616 | -0.465857225 |
| SPI1     | METTL1 | 3.20E-04    | -0.722528668 |
| ZNRD1    | METTL1 | 9.24E-05    | 0.762638935  |

|            |        |             |              |
|------------|--------|-------------|--------------|
| TRMT11     | METTL1 | 0.030059067 | 0.485358391  |
| THUMPD1    | METTL1 | 0.001120269 | 0.673981292  |
| PFKP       | METTL1 | 0.02712902  | 0.49319182   |
| IDI1       | METTL1 | 0.004871993 | 0.603170513  |
| TRAM1      | METTL1 | 0.046360991 | 0.450247805  |
| TNFRSF1A   | METTL1 | 0.006690034 | -0.585431587 |
| CACNB1     | METTL1 | 0.015042394 | -0.535136531 |
| EVI5       | METTL1 | 0.014723071 | -0.536570832 |
| DNTTIP2    | METTL1 | 0.001976711 | 0.648637756  |
| TP53BP1    | METTL1 | 0.040377214 | 0.461818159  |
| RRP15      | METTL1 | 4.15E-05    | 0.784973456  |
| DHX8       | METTL1 | 0.01925347  | 0.518191626  |
| PMS2P4     | METTL1 | 0.00698563  | 0.58293427   |
| ZFY        | METTL1 | 0.002166781 | 0.644317595  |
| IDH3G      | METTL1 | 0.00741343  | -0.579469113 |
| ROGDI      | METTL1 | 0.001737082 | -0.654610139 |
| PDZD4      | METTL1 | 0.027445577 | -0.492314326 |
| CBFB       | METTL1 | 0.020107452 | 0.515124381  |
| RASSF1     | METTL1 | 0.031391699 | -0.481992842 |
| ATP11A     | METTL1 | 0.00632152  | -0.588674921 |
| TTC7A      | METTL1 | 0.034404987 | -0.474776308 |
| IP6K2      | METTL1 | 0.037737778 | 0.467347606  |
| CYFIP1     | METTL1 | 0.015498471 | -0.533129824 |
| KIF2A      | METTL1 | 0.040643112 | 0.461276801  |
| PSME4      | METTL1 | 0.034259896 | 0.475112235  |
| IFT80      | METTL1 | 2.13E-05    | 0.801807125  |
| SIRT2      | METTL1 | 1.64E-04    | -0.744941899 |
| PPP2R5B    | METTL1 | 0.010424092 | -0.558852578 |
| NUP133     | METTL1 | 0.005567224 | 0.595830065  |
| NUCKS1     | METTL1 | 0.002368146 | 0.640073418  |
| KCNAB2     | METTL1 | 0.042242549 | -0.458076969 |
| CLEC2D     | METTL1 | 3.26E-04    | 0.721933156  |
| FUNDC1     | METTL1 | 2.72E-06    | 0.845247902  |
| KIAA1107   | METTL1 | 0.006324057 | 0.588652071  |
| MAPK6      | METTL1 | 0.018097919 | 0.522519695  |
| GNB5       | METTL1 | 0.013065627 | 0.544445569  |
| RAB27A     | METTL1 | 0.02991892  | -0.485719089 |
| SCT        | METTL1 | 0.038160413 | -0.466442452 |
| NUCB2      | METTL1 | 0.007653524 | 0.577595484  |
| SPTB       | METTL1 | 0.02560709  | -0.497526918 |
| TMEM260    | METTL1 | 0.015239296 | 0.534264262  |
| CLTCL1     | METTL1 | 0.024857935 | -0.499735951 |
| FSTL3      | METTL1 | 0.002634971 | -0.634891146 |
| MNT        | METTL1 | 0.033788737 | -0.476210814 |
| POLB       | METTL1 | 0.014048574 | 0.539684699  |
| WIP1       | METTL1 | 0.046774372 | -0.449491934 |
| FRMPD1     | METTL1 | 0.041032247 | 0.460489457  |
| NDST1      | METTL1 | 0.003379289 | -0.622449846 |
| ASNS       | METTL1 | 7.29E-04    | 0.691721303  |
| AP3M2      | METTL1 | 0.036807472 | 0.469368128  |
| ST6GALNAC2 | METTL1 | 4.71E-04    | -0.708535779 |
| TESK2      | METTL1 | 0.015458516 | 0.533303712  |
| EIF2B3     | METTL1 | 0.005319862 | 0.598350463  |
| RAD18      | METTL1 | 7.08E-04    | 0.692840934  |

|           |        |             |              |
|-----------|--------|-------------|--------------|
| MAP4K4    | METTL1 | 4.19E-04    | 0.71290401   |
| MGAT4A    | METTL1 | 0.001349179 | 0.665935506  |
| RPL31     | METTL1 | 4.25E-05    | 0.784327249  |
| ING3      | METTL1 | 3.66E-05    | 0.788239773  |
| ATP6AP1   | METTL1 | 0.013934132 | -0.540224916 |
| TRIB2     | METTL1 | 0.036494341 | 0.470057142  |
| MBD3      | METTL1 | 0.021919882 | -0.508943576 |
| CYBRD1    | METTL1 | 0.017011667 | -0.52679452  |
| PRKACA    | METTL1 | 1.01E-04    | -0.759886236 |
| SPP2      | METTL1 | 0.014424184 | 0.537936193  |
| PTPN18    | METTL1 | 4.63E-04    | -0.709163548 |
| LIMS2     | METTL1 | 0.004171532 | 0.611499236  |
| ALDH3A2   | METTL1 | 0.026544958 | -0.494832233 |
| TFRC      | METTL1 | 0.018963748 | 0.519256869  |
| AFF4      | METTL1 | 0.043617503 | 0.455400209  |
| UBE2D1    | METTL1 | 0.011947398 | -0.550226941 |
| MPP5      | METTL1 | 0.002062075 | 0.646656355  |
| MARK2     | METTL1 | 0.040577804 | -0.46140951  |
| FBXW11    | METTL1 | 0.006215873 | 0.589633323  |
| ACAP1     | METTL1 | 0.030294877 | 0.484754453  |
| CRMP1     | METTL1 | 0.002441701 | 0.638598089  |
| SIDT1     | METTL1 | 0.006211229 | 0.589675755  |
| MRV11     | METTL1 | 0.020414061 | -0.514048445 |
| AP1M1     | METTL1 | 0.028489841 | -0.489474998 |
| PVR       | METTL1 | 0.023928321 | -0.502551493 |
| IKBKG     | METTL1 | 0.002449169 | -0.63845038  |
| PANX2     | METTL1 | 0.002523734 | -0.636995837 |
| CLCN4     | METTL1 | 0.033258498 | 0.477461538  |
| NLE1      | METTL1 | 1.45E-04    | 0.74901068   |
| SDHA      | METTL1 | 0.011570867 | 0.552272216  |
| SMARCE1   | METTL1 | 8.15E-04    | 0.687209957  |
| GSDMB     | METTL1 | 0.019063065 | 0.518890252  |
| KDM5A     | METTL1 | 0.024235717 | 0.501611047  |
| IGF2BP2   | METTL1 | 0.011309017 | -0.553726551 |
| ST6GAL1   | METTL1 | 0.0120295   | 0.549787909  |
| VDAC1P1   | METTL1 | 0.002993397 | 0.628578516  |
| FRY       | METTL1 | 0.030180646 | -0.485046551 |
| PICALM    | METTL1 | 0.03738768  | -0.46810339  |
| NOTCH3    | METTL1 | 0.017428624 | -0.525128495 |
| CLNS1A    | METTL1 | 0.002803093 | 0.631846543  |
| TEAD2     | METTL1 | 0.036485728 | 0.470076159  |
| EED       | METTL1 | 0.001733309 | 0.654709585  |
| MGLL      | METTL1 | 0.025078775 | -0.499079355 |
| BCS1L     | METTL1 | 0.045796122 | 0.451289091  |
| ANO8      | METTL1 | 0.035788324 | -0.471627707 |
| TUBE1     | METTL1 | 2.61E-04    | 0.729625896  |
| ARHGEF10L | METTL1 | 0.006962768 | -0.583124298 |
| ACTR6     | METTL1 | 9.01E-06    | 0.821373937  |
| NUP37     | METTL1 | 0.006884085 | 0.583782228  |
| SEMA3C    | METTL1 | 0.008074279 | -0.574424893 |
| GRAMD4    | METTL1 | 0.00390747  | -0.614941621 |
| CELSR1    | METTL1 | 0.009366895 | 0.565462012  |
| ZNF638    | METTL1 | 0.038890226 | 0.46489757   |
| RASAL2    | METTL1 | 0.016431561 | 0.529167698  |

|          |        |             |              |
|----------|--------|-------------|--------------|
| VPS9D1   | METTL1 | 0.015297371 | -0.53400872  |
| FRYL     | METTL1 | 0.017583082 | 0.524519423  |
| ACTB     | METTL1 | 0.002067768 | -0.646526673 |
| PLD1     | METTL1 | 0.016965509 | -0.526980954 |
| DLG1     | METTL1 | 0.016631586 | 0.528341933  |
| RAB7A    | METTL1 | 0.01953369  | -0.517173416 |
| SART3    | METTL1 | 0.002295719 | 0.641563975  |
| ARHGAP15 | METTL1 | 5.01E-06    | 0.833548411  |
| EXOSC7   | METTL1 | 9.63E-05    | 0.761416929  |
| KIFAP3   | METTL1 | 0.025497838 | 0.497845863  |
| REXO2    | METTL1 | 0.002041892 | 0.64711853   |
| RBM7     | METTL1 | 0.019377346 | 0.517740062  |
| RBMS2    | METTL1 | 0.00596329  | -0.591980111 |
| MLH1     | METTL1 | 4.77E-04    | 0.708094427  |
| KLHL20   | METTL1 | 0.010360455 | 0.559234633  |
| PLXNA2   | METTL1 | 0.002369478 | -0.640046362 |
| TPD52    | METTL1 | 7.61E-05    | 0.768264019  |
| TRAF4    | METTL1 | 0.001627471 | 0.65757537   |
| STXBP2   | METTL1 | 7.43E-04    | -0.690962498 |
| NFKB2    | METTL1 | 0.019595456 | 0.51695055   |
| DNAJC10  | METTL1 | 0.009813407 | 0.562600077  |
| IL4R     | METTL1 | 0.007320232 | 0.58020979   |
| FAM76B   | METTL1 | 0.009884409 | 0.562154797  |
| JADE1    | METTL1 | 0.038901331 | 0.464874236  |
| MAP2     | METTL1 | 0.029059146 | 0.487961395  |
| MCCC1    | METTL1 | 0.033653334 | 0.476528735  |
| LAMP3    | METTL1 | 5.72E-06    | 0.830859238  |
| FAP      | METTL1 | 0.044755245 | 0.453234021  |
| ACER3    | METTL1 | 0.035482523 | -0.472315466 |
| UBE2K    | METTL1 | 0.001109999 | 0.674373734  |
| N4BP2    | METTL1 | 0.032422001 | 0.479466713  |
| PMS2P1   | METTL1 | 6.51E-05    | 0.772687781  |
| HOXA9    | METTL1 | 0.005635833 | -0.595147353 |
| EDN1     | METTL1 | 0.012987986 | 0.544833791  |
| MLLT10   | METTL1 | 0.017873904 | 0.52338415   |
| P2RY10   | METTL1 | 2.04E-05    | 0.802834183  |
| ITM2A    | METTL1 | 9.94E-04    | 0.67903714   |
| SDF4     | METTL1 | 0.004509777 | -0.607343945 |
| TOLLIP   | METTL1 | 0.019901936 | -0.515852908 |
| XRCC5    | METTL1 | 0.030850148 | 0.483346756  |
| SP140    | METTL1 | 0.011095966 | 0.554930125  |
| CDC14A   | METTL1 | 0.001505899 | 0.661066921  |
| SENP1    | METTL1 | 0.031468637 | 0.481801979  |
| PAFAH1B3 | METTL1 | 0.002826314 | 0.631438064  |
| DDX1     | METTL1 | 0.007060971 | 0.582311638  |
| RIMS1    | METTL1 | 1.97E-04    | 0.739023868  |
| DDX43    | METTL1 | 0.023528559 | -0.503788937 |
| RAB21    | METTL1 | 8.19E-04    | 0.687025652  |
| SMARCA2  | METTL1 | 0.011025863 | 0.555330243  |
| HSP90AA1 | METTL1 | 0.007037298 | 0.582506686  |
| RBL1     | METTL1 | 0.041485396 | 0.459579836  |
| NDC80    | METTL1 | 0.017948445 | 0.523095546  |
| RSBN1    | METTL1 | 0.012782111 | 0.545872368  |
| MAGI3    | METTL1 | 0.004029636 | 0.613325832  |

|         |        |             |              |
|---------|--------|-------------|--------------|
| IMPG2   | METTL1 | 0.029452098 | 0.486930195  |
| PCNP    | METTL1 | 1.47E-04    | 0.748594744  |
| MEF2C   | METTL1 | 0.012458662 | 0.547531687  |
| UBA5    | METTL1 | 0.019721468 | 0.516497597  |
| ZNF510  | METTL1 | 1.66E-04    | 0.744679144  |
| JMJD4   | METTL1 | 3.09E-04    | 0.723772929  |
| SMARCD3 | METTL1 | 0.002815388 | -0.631629913 |
| BZW1    | METTL1 | 0.006644867 | 0.585821105  |
| C1QTNF3 | METTL1 | 2.22E-04    | 0.735092401  |
| CCNT2   | METTL1 | 0.030298559 | 0.48474505   |
| COBLL1  | METTL1 | 0.007514398 | 0.578675222  |
| TRAF5   | METTL1 | 0.014649438 | 0.536905115  |
| ITGB5   | METTL1 | 0.041885973 | -0.458782119 |
| LYRM2   | METTL1 | 0.001536716 | 0.660160092  |
| BCKDHB  | METTL1 | 0.002797684 | 0.631942099  |
| KAT6A   | METTL1 | 0.007591718 | 0.578073154  |
| ULK2    | METTL1 | 0.04723383  | -0.448657811 |
| GRHL2   | METTL1 | 0.012168172 | -0.549051858 |
| TNPO1   | METTL1 | 0.023844118 | 0.502810772  |
| PLOD1   | METTL1 | 0.003299443 | -0.623668386 |
| ITGAE   | METTL1 | 0.011658309 | 0.55179249   |
| DIS3    | METTL1 | 1.20E-04    | 0.754693855  |
| PIBF1   | METTL1 | 1.17E-05    | 0.815728952  |
| NUFIP1  | METTL1 | 3.22E-06    | 0.84206351   |
| PDS5B   | METTL1 | 0.005244321 | 0.599139385  |
| OXCT1   | METTL1 | 0.002377856 | 0.639876482  |
| RRAGB   | METTL1 | 0.003482001 | 0.620917012  |
| CYLD    | METTL1 | 3.16E-04    | 0.723071115  |
| SLC27A5 | METTL1 | 3.13E-04    | 0.723345874  |
| ZNF671  | METTL1 | 3.11E-05    | 0.792426955  |
| ZNF416  | METTL1 | 5.17E-04    | 0.70505273   |
| ZNF586  | METTL1 | 0.010983217 | 0.555574658  |
| RPS5    | METTL1 | 3.34E-05    | 0.790641302  |
| YTHDC1  | METTL1 | 6.19E-04    | 0.69814603   |
| CHMP2B  | METTL1 | 0.046247507 | 0.450456216  |
| HAL     | METTL1 | 0.021185733 | -0.511396351 |
| SSH1    | METTL1 | 4.04E-04    | -0.71424091  |
| GSTP1   | METTL1 | 3.16E-04    | -0.72305448  |
| APLP2   | METTL1 | 0.035410839 | -0.472477354 |
| WBP11   | METTL1 | 5.47E-04    | 0.702939349  |
| EIF3I   | METTL1 | 0.008637885 | 0.570382825  |
| COL16A1 | METTL1 | 0.004357223 | -0.609184971 |
| MAPRE3  | METTL1 | 0.008214707 | -0.573396743 |
| CAD     | METTL1 | 0.020334397 | 0.514326752  |
| CD59    | METTL1 | 9.84E-04    | 0.679442227  |
| TAF9    | METTL1 | 5.45E-06    | 0.831861684  |
| MYNN    | METTL1 | 0.001863814 | 0.65137126   |
| OVGP1   | METTL1 | 0.004788958 | 0.604104029  |
| MAP3K4  | METTL1 | 0.026324703 | 0.495458239  |
| PILRA   | METTL1 | 0.002531403 | -0.636848279 |
| ZNF213  | METTL1 | 0.005157233 | -0.600060611 |
| AKR1B1  | METTL1 | 0.01514717  | 0.534671241  |
| RRN3    | METTL1 | 0.004940732 | 0.602407606  |
| DDHD2   | METTL1 | 0.002340083 | 0.640646382  |

|           |        |             |              |
|-----------|--------|-------------|--------------|
| DNAJA1    | METTL1 | 0.022444229 | 0.50723139   |
| NFX1      | METTL1 | 0.005382808 | 0.597700093  |
| DIMT1     | METTL1 | 0.004991355 | 0.601851333  |
| IPO11     | METTL1 | 0.011483047 | 0.552756977  |
| NME8      | METTL1 | 0.006015648 | -0.591487028 |
| SNX10     | METTL1 | 0.033954718 | -0.475822447 |
| RBM22     | METTL1 | 0.039353367 | 0.463928809  |
| TXLNG     | METTL1 | 4.68E-05    | 0.781782595  |
| ALG9      | METTL1 | 0.022545199 | 0.506905336  |
| MYBPC2    | METTL1 | 0.016661871 | 0.528217601  |
| FTL       | METTL1 | 0.007649352 | -0.577627633 |
| PIGS      | METTL1 | 0.008992341 | -0.567949661 |
| PSMC5     | METTL1 | 4.87E-04    | 0.707313661  |
| UIMC1     | METTL1 | 2.77E-04    | 0.727588217  |
| LPCAT2    | METTL1 | 0.004551164 | -0.606853371 |
| OGFOD1    | METTL1 | 0.037741673 | 0.467339229  |
| SH3BP2    | METTL1 | 0.003988931 | -0.613859647 |
| NOP14     | METTL1 | 7.17E-06    | 0.826206515  |
| C14orf166 | METTL1 | 3.76E-05    | 0.787578368  |
| PHACTR3   | METTL1 | 0.049498718 | -0.444634692 |
| AAMDC     | METTL1 | 0.001361729 | 0.665528581  |
| RFX2      | METTL1 | 0.002822817 | -0.631499401 |
| DDX18     | METTL1 | 6.86E-05    | 0.771251401  |
| PDRG1     | METTL1 | 1.50E-04    | 0.747779147  |
| DOCK9     | METTL1 | 2.96E-04    | 0.725305967  |
| TGDS      | METTL1 | 4.33E-05    | 0.783829202  |
| C3orf18   | METTL1 | 0.02169499  | 0.509687912  |
| TMEM40    | METTL1 | 0.008471476 | -0.571553322 |
| SMOX      | METTL1 | 0.036991381 | -0.468965576 |
| FKBP1A    | METTL1 | 1.70E-04    | -0.743888022 |
| C20orf194 | METTL1 | 0.026453617 | -0.495091341 |
| TESC      | METTL1 | 0.024707805 | -0.50018495  |
| RPL6      | METTL1 | 0.019058934 | 0.51890547   |
| SIRPG     | METTL1 | 9.24E-04    | 0.682086444  |
| MAPKAPK5  | METTL1 | 0.003720295 | 0.617500337  |
| ESF1      | METTL1 | 2.00E-04    | 0.73854397   |
| RBBP9     | METTL1 | 0.006726409 | 0.585119452  |
| TASP1     | METTL1 | 3.51E-04    | 0.7192838    |
| RPLP0     | METTL1 | 1.46E-04    | 0.748807135  |
| PXN       | METTL1 | 0.003423662 | -0.621782962 |
| PEBP1     | METTL1 | 0.001219543 | 0.67033639   |
| ERP29     | METTL1 | 0.001114127 | 0.674215612  |
| FUS       | METTL1 | 0.001523918 | 0.660534803  |
| IGBP1     | METTL1 | 8.64E-04    | 0.684846673  |
| FXYD5     | METTL1 | 0.003406638 | 0.622037961  |
| CMTM1     | METTL1 | 0.035507346 | -0.472259465 |
| GMIP      | METTL1 | 0.002072812 | -0.646412012 |
| BIRC5     | METTL1 | 0.031771418 | 0.481054387  |
| MLF2      | METTL1 | 0.02278814  | -0.50612555  |
| DDX24     | METTL1 | 2.02E-04    | 0.738284006  |
| RCOR1     | METTL1 | 0.033005428 | -0.478063975 |
| PAPOLA    | METTL1 | 0.026626459 | 0.494601631  |
| RGS1      | METTL1 | 4.37E-05    | 0.783614403  |
| MRPS33    | METTL1 | 1.49E-05    | 0.810260286  |



|          |        |             |              |
|----------|--------|-------------|--------------|
| NDUFB2   | METTL1 | 4.37E-05    | 0.783614619  |
| STRN4    | METTL1 | 2.96E-04    | -0.725340037 |
| IRAK3    | METTL1 | 0.044787305 | -0.453173598 |
| FLT3LG   | METTL1 | 0.023248954 | 0.504664373  |
| GNPTG    | METTL1 | 0.013637094 | -0.54164394  |
| ZNF268   | METTL1 | 1.71E-05    | 0.806991699  |
| CD209    | METTL1 | 0.045062359 | -0.452656575 |
| MCOLN1   | METTL1 | 0.004290893 | -0.610002109 |
| EFNB1    | METTL1 | 0.021331114 | -0.510905331 |
| RBM27    | METTL1 | 0.002503082 | 0.637395068  |
| NLRC4    | METTL1 | 0.030313379 | -0.484707223 |
| PUS7     | METTL1 | 0.006535366 | 0.586774531  |
| SLC26A4  | METTL1 | 1.64E-04    | 0.744949656  |
| ABCC6    | METTL1 | 0.023439342 | -0.504067372 |
| ITGA6    | METTL1 | 0.009629087 | 0.563768379  |
| RAPGEF4  | METTL1 | 0.008359177 | 0.572353859  |
| SMPX     | METTL1 | 1.97E-04    | 0.739023868  |
| FH       | METTL1 | 0.034243545 | 0.475150162  |
| SEL1L3   | METTL1 | 0.006846506 | 0.584098634  |
| ZC3HC1   | METTL1 | 0.009178277 | 0.56670441   |
| CD200    | METTL1 | 0.046953992 | 0.449165098  |
| JPH4     | METTL1 | 0.044790137 | -0.453168261 |
| HECTD1   | METTL1 | 0.006656951 | 0.585716678  |
| HNRNPC   | METTL1 | 3.42E-04    | 0.720191017  |
| GEMIN2   | METTL1 | 0.005661355 | 0.59489514   |
| DAZL     | METTL1 | 1.42E-04    | 0.749566008  |
| TRPM7    | METTL1 | 0.009232287 | 0.566346543  |
| TYRO3    | METTL1 | 0.022947552 | -0.50561745  |
| EZR      | METTL1 | 1.32E-04    | 0.751814629  |
| AGO1     | METTL1 | 0.015165946 | -0.534588136 |
| RFFL     | METTL1 | 0.028772113 | 0.488721583  |
| UNC13D   | METTL1 | 0.007632289 | -0.577759242 |
| DPYSL2   | METTL1 | 0.007285688 | -0.580486288 |
| COMT     | METTL1 | 0.040996616 | -0.460561309 |
| LRRFIP2  | METTL1 | 0.010618481 | -0.557697124 |
| SEC22C   | METTL1 | 0.005930393 | 0.592291739  |
| UPRT     | METTL1 | 0.002289863 | 0.641686207  |
| CDC23    | METTL1 | 0.003271441 | 0.62410152   |
| SUCO     | METTL1 | 0.005805738 | 0.593485647  |
| MAP3K1   | METTL1 | 0.001334095 | 0.666428803  |
| EPB41L4B | METTL1 | 0.025906562 | 0.49665813   |
| PTGS1    | METTL1 | 0.028978331 | -0.48817483  |
| CRAT     | METTL1 | 0.007111256 | -0.581899089 |
| TBC1D2   | METTL1 | 0.012555626 | -0.547030634 |
| IKZF5    | METTL1 | 0.014473996 | 0.537707072  |
| BLNK     | METTL1 | 3.97E-04    | 0.714836559  |
| TLL2     | METTL1 | 8.85E-04    | 0.6838657    |
| CREM     | METTL1 | 4.01E-04    | 0.71446947   |
| HIVEP1   | METTL1 | 0.033902814 | 0.475943734  |
| TREM2    | METTL1 | 0.028488402 | -0.489478854 |
| TMEM14A  | METTL1 | 0.001831411 | 0.652181397  |
| RPS18    | METTL1 | 3.06E-05    | 0.79286847   |
| HSP90AB1 | METTL1 | 9.52E-07    | 0.863334184  |
| CDC5L    | METTL1 | 0.001014302 | 0.678185579  |

|          |        |             |              |
|----------|--------|-------------|--------------|
| ZNF184   | METTL1 | 0.003215657 | 0.624973672  |
| SIRT1    | METTL1 | 7.76E-04    | 0.689179753  |
| HNRNPH3  | METTL1 | 0.001253238 | 0.669156011  |
| IFT74    | METTL1 | 0.001831447 | 0.652180477  |
| ABLIM1   | METTL1 | 0.002307166 | 0.641325797  |
| RAB18    | METTL1 | 0.005487986 | 0.596627212  |
| MAST3    | METTL1 | 0.035285812 | -0.472760322 |
| OCEL1    | METTL1 | 0.004438522 | -0.608197336 |
| MYO9B    | METTL1 | 4.51E-04    | -0.710136812 |
| KCNK6    | METTL1 | 0.008034439 | -0.574719245 |
| FBXL19   | METTL1 | 0.038948861 | -0.464774428 |
| BCL7C    | METTL1 | 0.006161204 | 0.590134533  |
| CIRBP    | METTL1 | 8.97E-06    | 0.821475476  |
| ATP5D    | METTL1 | 0.040979139 | -0.460596569 |
| HNRNPM   | METTL1 | 0.00138027  | 0.664933169  |
| NDUFB7   | METTL1 | 0.01562995  | -0.532560136 |
| MTAP     | METTL1 | 0.003411698 | 0.621962054  |
| POLR2E   | METTL1 | 0.002183941 | -0.643943337 |
| HCN2     | METTL1 | 0.011629769 | -0.551948747 |
| IZUMO4   | METTL1 | 0.011185224 | 0.554423628  |
| ARVCF    | METTL1 | 0.04655662  | -0.449889452 |
| SNAP29   | METTL1 | 0.024178099 | -0.501786599 |
| SMARCB1  | METTL1 | 0.012372305 | 0.547980581  |
| OSM      | METTL1 | 0.006803295 | 0.584464224  |
| SF3A1    | METTL1 | 0.002108119 | 0.645615946  |
| SEC14L2  | METTL1 | 0.012000519 | 0.549942608  |
| SPECC1L  | METTL1 | 0.004488385 | 0.607598975  |
| SNRPD3   | METTL1 | 0.005249634 | 0.599083598  |
| PES1     | METTL1 | 0.047262641 | 0.448605715  |
| MAPK1    | METTL1 | 0.015242619 | -0.534249616 |
| PPM1F    | METTL1 | 7.44E-04    | -0.690898608 |
| SLC35E4  | METTL1 | 0.02211906  | -0.508289396 |
| SH3BP1   | METTL1 | 0.02126952  | -0.511113038 |
| HPS4     | METTL1 | 0.023853451 | 0.502781998  |
| PIK3IP1  | METTL1 | 0.005401377 | 0.59750943   |
| PATZ1    | METTL1 | 0.017216476 | 0.525972131  |
| TRIOBP   | METTL1 | 0.020610365 | -0.513366317 |
| TFIP11   | METTL1 | 0.003227269 | 0.624791091  |
| HSCB     | METTL1 | 0.007081804 | 0.582140424  |
| CBY1     | METTL1 | 0.017959996 | 0.523050909  |
| TOMM22   | METTL1 | 0.015560537 | 0.532860414  |
| JOSD1    | METTL1 | 0.00247715  | 0.637900276  |
| CYB5R3   | METTL1 | 1.39E-04    | -0.750203603 |
| TOM1     | METTL1 | 0.015713639 | -0.532199524 |
| CHKB     | METTL1 | 9.68E-04    | 0.680150194  |
| HMOX1    | METTL1 | 0.011951339 | -0.550205811 |
| ARSA     | METTL1 | 0.041882635 | -0.458788742 |
| TSPO     | METTL1 | 2.08E-04    | -0.737239009 |
| RASD2    | METTL1 | 0.044004336 | 0.454658868  |
| RPL3     | METTL1 | 0.005257326 | 0.599002897  |
| RBFOX2   | METTL1 | 1.43E-04    | 0.749290094  |
| SYNGR1   | METTL1 | 0.005381905 | -0.597709373 |
| EIF3D    | METTL1 | 9.84E-05    | 0.760776395  |
| KIAA0930 | METTL1 | 0.001085795 | -0.675310809 |

|          |        |             |              |
|----------|--------|-------------|--------------|
| SLC25A17 | METTL1 | 0.004347014 | 0.609310073  |
| KCTD17   | METTL1 | 0.036668981 | -0.4696723   |
| ST13     | METTL1 | 0.001620353 | 0.65777365   |
| RANGAP1  | METTL1 | 0.017094319 | 0.526461688  |
| PHF5A    | METTL1 | 0.008155526 | 0.573828278  |
| PMM1     | METTL1 | 0.001231164 | 0.669926216  |
| KHNYN    | METTL1 | 5.85E-06    | 0.830408404  |
| FKBP3    | METTL1 | 5.49E-04    | 0.702743706  |
| PRMT5    | METTL1 | 7.20E-04    | 0.692176732  |
| AP4S1    | METTL1 | 4.73E-04    | 0.708393065  |
| VCPKMT   | METTL1 | 2.16E-04    | 0.736095817  |
| PYGL     | METTL1 | 0.021342954 | -0.510865459 |
| PSMC6    | METTL1 | 0.001617623 | 0.657849896  |
| GNPNAT1  | METTL1 | 0.024961993 | 0.499425996  |
| CNIH1    | METTL1 | 0.044911195 | 0.452940419  |
| CGRRF1   | METTL1 | 5.46E-05    | 0.77759231   |
| PLEK2    | METTL1 | 0.022767464 | 0.50619166   |
| TIMM9    | METTL1 | 1.22E-06    | 0.85924029   |
| GSTZ1    | METTL1 | 0.017972088 | 0.523004205  |
| KIAA0586 | METTL1 | 0.007893691 | 0.575768773  |
| TMED8    | METTL1 | 0.048075222 | 0.447146318  |
| RIN3     | METTL1 | 0.002253337 | -0.642454501 |
| LGMN     | METTL1 | 0.003832709 | 0.615951171  |
| SNW1     | METTL1 | 3.95E-04    | 0.71506466   |
| ITPK1    | METTL1 | 0.004211337 | -0.610996072 |
| ERH      | METTL1 | 0.012043606 | 0.549712725  |
| SRSF5    | METTL1 | 2.63E-04    | 0.72938774   |
| EIF5     | METTL1 | 0.022781676 | 0.506146213  |
| SLC8A3   | METTL1 | 0.005489408 | -0.596612829 |
| ZFYVE21  | METTL1 | 0.01374356  | -0.541132486 |
| TCL1A    | METTL1 | 0.005969954 | 0.59191715   |
| GSKIP    | METTL1 | 0.012031245 | 0.54977861   |
| VRK1     | METTL1 | 5.25E-05    | 0.778679557  |
| RPS6KA5  | METTL1 | 0.005367207 | 0.597860695  |
| C14orf93 | METTL1 | 0.049152176 | 0.445240983  |
| PSMB5    | METTL1 | 1.18E-05    | 0.815414706  |
| CCNB1IP1 | METTL1 | 8.11E-04    | 0.687400489  |
| APEX1    | METTL1 | 5.96E-04    | 0.69963228   |
| ARHGAP5  | METTL1 | 0.004093548 | 0.612496623  |
| KIAA0391 | METTL1 | 1.51E-05    | 0.809909423  |
| DCAF11   | METTL1 | 0.004530265 | 0.607100626  |
| EMC9     | METTL1 | 0.0365444   | 0.469946683  |
| BRMS1L   | METTL1 | 0.013067076 | 0.544438339  |
| PNN      | METTL1 | 4.01E-04    | 0.714520922  |
| NFATC4   | METTL1 | 0.032691537 | 0.478816235  |
| CD40     | METTL1 | 3.75E-04    | 0.716915209  |
| IFT52    | METTL1 | 0.009572944 | 0.564127847  |
| C20orf24 | METTL1 | 0.001555529 | -0.659613961 |
| STK4     | METTL1 | 0.012347935 | 0.548107719  |
| ADNP     | METTL1 | 0.027186261 | 0.493032551  |
| PFDN4    | METTL1 | 1.77E-04    | 0.742512502  |
| CSTF1    | METTL1 | 8.28E-05    | 0.765846792  |
| RAE1     | METTL1 | 0.011276542 | 0.553908821  |
| TPD52L2  | METTL1 | 0.019002522 | -0.519113558 |

|          |        |             |              |
|----------|--------|-------------|--------------|
| CTSZ     | METTL1 | 0.032782229 | -0.478598308 |
| PRPF6    | METTL1 | 0.042738666 | 0.457103479  |
| MTG2     | METTL1 | 0.046931449 | 0.449206064  |
| NTSR1    | METTL1 | 0.047312964 | -0.448514776 |
| C20orf27 | METTL1 | 0.001206915 | -0.670785838 |
| ISM1     | METTL1 | 0.011408338 | 0.553171736  |
| RNF24    | METTL1 | 0.01455952  | -0.537315166 |
| RASSF2   | METTL1 | 0.00831209  | -0.572692136 |
| CDS2     | METTL1 | 0.047246977 | 0.448634035  |
| SIRPB1   | METTL1 | 0.023698093 | -0.503262136 |
| HCK      | METTL1 | 0.012524797 | -0.5471896   |
| TM9SF4   | METTL1 | 0.029574114 | -0.486612195 |
| CRNKL1   | METTL1 | 0.01953641  | 0.51716359   |
| SAMHD1   | METTL1 | 0.042189167 | -0.458182242 |
| NOP56    | METTL1 | 9.04E-05    | 0.763288614  |
| JAG1     | METTL1 | 0.040558699 | -0.461448364 |
| CST3     | METTL1 | 5.76E-04    | -0.700908953 |
| PPP1R16B | METTL1 | 0.013165664 | 0.54394809   |
| DHX35    | METTL1 | 0.031665871 | 0.481314356  |
| APMAP    | METTL1 | 0.014972405 | -0.535448791 |
| ZNF516   | METTL1 | 0.005528552 | -0.596217938 |
| CDH20    | METTL1 | 0.00595093  | 0.592097031  |
| ADNP2    | METTL1 | 0.017838365 | 0.523522087  |
| RBFA     | METTL1 | 4.04E-04    | 0.714201998  |
| METTL4   | METTL1 | 8.36E-05    | 0.765553587  |
| LPIN2    | METTL1 | 0.036902165 | 0.469160663  |
| SMCHD1   | METTL1 | 0.006599028 | 0.586218643  |
| MYL12A   | METTL1 | 0.020474528 | 0.513837775  |
| RNMT     | METTL1 | 7.02E-06    | 0.826652613  |
| LAMA1    | METTL1 | 5.55E-05    | 0.777120533  |
| VSIG1    | METTL1 | 0.001008689 | 0.678418439  |
| PGRMC1   | METTL1 | 0.045200136 | -0.452398505 |
| ATP1B4   | METTL1 | 0.007601485 | 0.577997457  |
| ALG13    | METTL1 | 0.007527379 | 0.578573791  |
| PRPS2    | METTL1 | 0.015349203 | 0.533781307  |
| MOSPD1   | METTL1 | 0.001558338 | 0.659532894  |
| AMMECR1  | METTL1 | 6.52E-04    | 0.696085839  |
| XIAP     | METTL1 | 0.012906219 | 0.545244682  |
| STAG2    | METTL1 | 0.018644474 | 0.520445918  |
| ATP11C   | METTL1 | 0.001802806 | 0.652906618  |
| ABCD1    | METTL1 | 7.61E-05    | -0.768263778 |
| NAA10    | METTL1 | 0.01357982  | 0.541920409  |
| ELF4     | METTL1 | 0.005047843 | -0.60123609  |
| RBBP7    | METTL1 | 5.27E-05    | 0.778539884  |
| PPP1R2P9 | METTL1 | 0.008602228 | 0.570632071  |
| PIM2     | METTL1 | 7.21E-04    | 0.692133061  |
| PQBP1    | METTL1 | 1.05E-04    | 0.758944049  |
| RS1      | METTL1 | 0.002649413 | 0.63462336   |
| UBL4A    | METTL1 | 0.033097126 | -0.477845273 |
| JADE3    | METTL1 | 0.010825842 | 0.556483336  |
| USP11    | METTL1 | 0.0161818   | 0.530210183  |
| HTATSF1  | METTL1 | 5.03E-05    | 0.779793963  |
| CD40LG   | METTL1 | 7.38E-04    | 0.691213491  |
| PCDH11X  | METTL1 | 0.012967506 | 0.544936512  |

|          |        |             |              |
|----------|--------|-------------|--------------|
| PIN4     | METTL1 | 0.031815781 | 0.480945322  |
| MAGED2   | METTL1 | 0.035930136 | 0.471310316  |
| RBM3     | METTL1 | 4.24E-04    | 0.712438609  |
| SYTL4    | METTL1 | 0.048500015 | -0.446390909 |
| ZDHHC15  | METTL1 | 7.18E-05    | 0.769924989  |
| PBDC1    | METTL1 | 0.030762455 | 0.483567744  |
| BEX4     | METTL1 | 0.003255501 | 0.624349471  |
| TNFSF13B | METTL1 | 0.02700425  | -0.493539898 |
| UGGT2    | METTL1 | 0.027872246 | -0.491144123 |
| FGF9     | METTL1 | 0.034493386 | 0.474572181  |
| SLC25A15 | METTL1 | 0.009624638 | 0.563796805  |
| KPNA3    | METTL1 | 0.009891391 | 0.562111147  |
| FLT1     | METTL1 | 0.037798798 | 0.467216435  |
| VWA8     | METTL1 | 0.041795199 | 0.458962369  |
| MEDAG    | METTL1 | 0.040378544 | 0.461815443  |
| CLN5     | METTL1 | 9.75E-04    | 0.679839348  |
| MSLN     | METTL1 | 0.029240061 | -0.487485281 |
| MGRN1    | METTL1 | 0.004541536 | -0.606967165 |
| LYRM1    | METTL1 | 1.14E-04    | 0.756261532  |
| NUTF2    | METTL1 | 0.020545743 | 0.513590296  |
| CENPT    | METTL1 | 0.041090132 | 0.460372831  |
| N4BP1    | METTL1 | 0.006229021 | 0.589513322  |
| ARL2BP   | METTL1 | 0.001762843 | 0.6539361    |
| CTCF     | METTL1 | 0.00479617  | 0.604022416  |
| POLR2C   | METTL1 | 2.92E-04    | 0.72578407   |
| ZNF821   | METTL1 | 7.25E-04    | 0.691944121  |
| USB1     | METTL1 | 0.013052392 | -0.544511612 |
| PSMD7    | METTL1 | 4.42E-04    | 0.710895074  |
| SLC38A7  | METTL1 | 0.037367851 | -0.468146362 |
| HAS3     | METTL1 | 0.026152859 | 0.495949528  |
| TANGO6   | METTL1 | 0.003074595 | 0.627236533  |
| SMPD3    | METTL1 | 0.034812033 | -0.473839743 |
| PLA2G15  | METTL1 | 0.007453491 | -0.579153065 |
| CMC2     | METTL1 | 0.018450282 | 0.521177107  |
| HCFC1R1  | METTL1 | 0.005965356 | -0.591960583 |
| MLYCD    | METTL1 | 0.04592511  | -0.451050447 |
| HSDL1    | METTL1 | 0.011447895 | 0.552951855  |
| NAGPA    | METTL1 | 0.00772054  | -0.577081103 |
| COTL1    | METTL1 | 0.006156556 | -0.590177308 |
| USP10    | METTL1 | 0.001540338 | 0.660054496  |
| NME4     | METTL1 | 0.027189279 | 0.493024162  |
| ABCC1    | METTL1 | 0.002397203 | 0.639486095  |
| FOXF1    | METTL1 | 0.023930973 | 0.50254334   |
| CLCN7    | METTL1 | 0.022982412 | -0.50550671  |
| FAM173A  | METTL1 | 0.01452901  | -0.537454762 |
| ZP2      | METTL1 | 0.007117936 | 0.581844464  |
| MEFV     | METTL1 | 0.026003612 | -0.496378284 |
| CAPN15   | METTL1 | 0.003492331 | -0.620764932 |
| PIEZO1   | METTL1 | 0.031167325 | -0.482551555 |
| GSPT1    | METTL1 | 0.012491367 | 0.547362334  |
| CLUAP1   | METTL1 | 0.020119483 | 0.515081918  |
| GGA2     | METTL1 | 0.005466075 | 0.59684932   |
| CPPED1   | METTL1 | 0.003351595 | -0.622869751 |
| USP31    | METTL1 | 0.019923398 | -0.515776548 |

|           |        |             |              |
|-----------|--------|-------------|--------------|
| RPGRIP1L  | METTL1 | 0.018261031 | 0.521895626  |
| CDIPT     | METTL1 | 0.030610258 | -0.483952457 |
| BCKDK     | METTL1 | 0.004889278 | -0.602977846 |
| IL21R     | METTL1 | 0.024171763 | 0.501805927  |
| RNF40     | METTL1 | 0.048574348 | -0.446259244 |
| KNOP1     | METTL1 | 7.55E-04    | 0.690319926  |
| AAGAB     | METTL1 | 0.036785598 | 0.46941611   |
| LACTB     | METTL1 | 0.010871056 | -0.556221182 |
| CORO2B    | METTL1 | 0.014030525 | 0.539769662  |
| GOLGA8UP  | METTL1 | 1.64E-04    | 0.745019214  |
| FAH       | METTL1 | 0.014011632 | -0.539858692 |
| TMEM87A   | METTL1 | 4.11E-04    | 0.71358218   |
| ATP8B4    | METTL1 | 0.037618173 | -0.467605193 |
| GABPB1    | METTL1 | 0.002416085 | 0.639107628  |
| BMF       | METTL1 | 0.013695777 | -0.541361634 |
| DMXL2     | METTL1 | 0.026375913 | -0.495312323 |
| RHOV      | METTL1 | 2.20E-05    | 0.801035148  |
| MYEF2     | METTL1 | 0.008295652 | 0.572810598  |
| ZFAND1    | METTL1 | 7.18E-06    | 0.826197621  |
| CA2       | METTL1 | 0.028675828 | -0.488977925 |
| INTS9     | METTL1 | 2.63E-04    | 0.729369442  |
| LAPTM4B   | METTL1 | 0.021646218 | 0.509850143  |
| EIF3E     | METTL1 | 1.84E-04    | 0.741268072  |
| ARMC1     | METTL1 | 0.008590571 | 0.570713735  |
| TRPS1     | METTL1 | 0.022195947 | -0.50803812  |
| CHRAC1    | METTL1 | 0.046109435 | 0.450710314  |
| UBR5      | METTL1 | 0.040611402 | 0.461341217  |
| TSTA3     | METTL1 | 0.046596577 | 0.449816402  |
| INTS10    | METTL1 | 5.18E-04    | 0.704979328  |
| MTMR9     | METTL1 | 0.011756491 | 0.5512573    |
| LEPROTL1  | METTL1 | 7.45E-05    | 0.768877915  |
| DCTN6     | METTL1 | 0.010912327 | 0.555982657  |
| GSR       | METTL1 | 0.004354742 | -0.609215352 |
| TNFRSF10A | METTL1 | 2.95E-04    | 0.725407027  |
| ASAH1     | METTL1 | 0.04511063  | -0.452566089 |
| MAN2B1    | METTL1 | 0.012322755 | -0.548239296 |
| MAP4K1    | METTL1 | 0.042456542 | 0.457655991  |
| ECH1      | METTL1 | 0.027531102 | 0.492078618  |
| HNRNPL    | METTL1 | 0.035544475 | 0.472175762  |
| SARS2     | METTL1 | 1.78E-04    | 0.742372838  |
| CLPTM1    | METTL1 | 0.008602462 | -0.570630431 |
| FCGRT     | METTL1 | 0.002057112 | -0.646769658 |
| PIH1D1    | METTL1 | 0.027654753 | 0.491738853  |
| ARHGEF18  | METTL1 | 0.008138815 | 0.573950588  |
| CD37      | METTL1 | 0.023209391 | 0.504788915  |
| LYL1      | METTL1 | 0.010659369 | -0.557456276 |
| OAZ1      | METTL1 | 0.036049854 | -0.471043134 |
| TRMT1     | METTL1 | 6.09E-04    | 0.698790427  |
| STX10     | METTL1 | 0.038366611 | -0.46600366  |
| FCER2     | METTL1 | 0.005016671 | 0.6015749    |
| RSPH6A    | METTL1 | 0.035361997 | -0.472587804 |
| TLE6      | METTL1 | 5.99E-04    | 0.699417613  |
| LILRB1    | METTL1 | 0.011605024 | -0.552084476 |
| LILRA1    | METTL1 | 0.003539708 | -0.62007222  |

|          |        |             |              |
|----------|--------|-------------|--------------|
| SNAPC2   | METTL1 | 0.006615389 | -0.586076495 |
| C19orf53 | METTL1 | 0.001594881 | 0.658489282  |
| AKAP8    | METTL1 | 0.020180225 | 0.514867836  |
| EPHX3    | METTL1 | 0.023763332 | -0.503060209 |
| SYDE1    | METTL1 | 0.018172777 | 0.522232731  |
| URI1     | METTL1 | 0.010125342 | 0.560662926  |
| RPS16    | METTL1 | 2.42E-04    | 0.732278608  |
| TIMM50   | METTL1 | 0.012015525 | 0.549862471  |
| FBL      | METTL1 | 0.001725706 | 0.654910486  |
| PLD3     | METTL1 | 0.015884718 | -0.531467118 |
| CCDC94   | METTL1 | 0.021997676 | 0.508687509  |
| POLR2I   | METTL1 | 0.002714262 | 0.633435666  |
| SLC1A5   | METTL1 | 0.006495072 | -0.587128667 |
| APLP1    | METTL1 | 0.013095809 | 0.544295154  |
| BBC3     | METTL1 | 0.04047383  | -0.461621133 |
| TGFB1    | METTL1 | 5.72E-05    | -0.776287208 |
| DENND3   | METTL1 | 0.035728972 | -0.471760832 |
| CEACAM4  | METTL1 | 0.042085669 | -0.458386641 |
| MRPL4    | METTL1 | 0.022087228 | 0.508393632  |
| CD79A    | METTL1 | 8.89E-04    | 0.683678283  |
| RPS19    | METTL1 | 7.24E-06    | 0.82601741   |
| ICAM5    | METTL1 | 0.010509105 | -0.558345125 |
| CD33     | METTL1 | 0.015531208 | -0.532987616 |
| CEACAM5  | METTL1 | 0.001961297 | 0.649003125  |
| CRX      | METTL1 | 0.004832447 | 0.603613453  |
| BABAM1   | METTL1 | 0.037832477 | 0.467144109  |
| TYK2     | METTL1 | 0.003412001 | -0.621957508 |
| SULT2A1  | METTL1 | 0.012174872 | 0.549016464  |
| PTPRS    | METTL1 | 0.044969154 | -0.452831501 |
| KDELRL1  | METTL1 | 0.001463092 | -0.662352813 |
| GRIN2D   | METTL1 | 0.009315562 | -0.565798099 |
| CLEC11A  | METTL1 | 3.63E-04    | -0.718137479 |
| LIG1     | METTL1 | 0.008768864 | 0.569474401  |
| PLA2G4C  | METTL1 | 0.049462956 | 0.444697108  |
| RAB3D    | METTL1 | 0.001451157 | -0.662716969 |
| DBP      | METTL1 | 0.018020826 | -0.522816221 |
| WDR83OS  | METTL1 | 0.026344377 | 0.495402154  |
| CACNG7   | METTL1 | 1.97E-04    | 0.739023868  |
| MAST1    | METTL1 | 0.049476979 | -0.444672628 |
| PRPF31   | METTL1 | 1.13E-04    | 0.756747307  |
| TFPT     | METTL1 | 0.001381823 | 0.664883606  |
| RPL18A   | METTL1 | 0.008723074 | 0.569790714  |
| ELL      | METTL1 | 0.006267224 | -0.589165821 |
| TMEM147  | METTL1 | 0.033093338 | 0.477854297  |
| TMEM59L  | METTL1 | 0.033628867 | -0.476586291 |
| USF2     | METTL1 | 0.034370272 | -0.474856582 |
| LSR      | METTL1 | 0.014944165 | 0.535575116  |
| KXD1     | METTL1 | 5.21E-04    | 0.704745122  |
| HPN      | METTL1 | 0.046842455 | -0.449367937 |
| ZNF14    | METTL1 | 0.003844181 | 0.615795199  |
| ERF      | METTL1 | 0.023955186 | -0.502468922 |
| GSK3A    | METTL1 | 0.009115067 | -0.567125416 |
| ZNF85    | METTL1 | 0.009338087 | 0.565650441  |
| CDK6     | METTL1 | 0.021146652 | 0.511528802  |

|         |        |             |              |
|---------|--------|-------------|--------------|
| PMPCB   | METTL1 | 6.94E-06    | 0.826900025  |
| DNAJC2  | METTL1 | 0.009493245 | 0.564641103  |
| TWISTNB | METTL1 | 1.94E-05    | 0.803983112  |
| HBP1    | METTL1 | 9.93E-05    | 0.76049479   |
| DUS4L   | METTL1 | 0.002425624 | 0.638917365  |
| CBLL1   | METTL1 | 0.030168906 | 0.485076619  |
| STEAP1B | METTL1 | 1.50E-04    | 0.747901584  |
| MPP6    | METTL1 | 0.030189477 | 0.485023938  |
| DFNA5   | METTL1 | 0.002088747 | 0.646051331  |
| TTC26   | METTL1 | 0.006856143 | 0.584017352  |
| ADAP1   | METTL1 | 2.11E-04    | -0.736849097 |
| TFEC    | METTL1 | 0.023045899 | -0.505305377 |
| H2AFV   | METTL1 | 0.009002878 | 0.567878536  |
| HOXA3   | METTL1 | 0.014641432 | -0.536941541 |
| LFNG    | METTL1 | 0.042801875 | -0.456980076 |
| BRAT1   | METTL1 | 0.023713381 | -0.503214776 |
| IQCE    | METTL1 | 0.004103219 | -0.612372096 |
| SSBP1   | METTL1 | 0.013429812 | 0.542649004  |
| CPVL    | METTL1 | 0.030433249 | -0.484401777 |
| CHN2    | METTL1 | 0.003585121 | -0.619415383 |
| ABHD11  | METTL1 | 0.00233444  | -0.640762275 |
| NOD1    | METTL1 | 0.001187271 | 0.671492947  |
| GHRHR   | METTL1 | 5.52E-05    | 0.777278283  |
| CHCHD2  | METTL1 | 0.019160879 | 0.518530666  |
| PDAP1   | METTL1 | 0.005917484 | 0.592414414  |
| BUD31   | METTL1 | 0.003032496 | 0.627928584  |
| PTCD1   | METTL1 | 0.028744263 | 0.488795659  |
| NUDT1   | METTL1 | 9.74E-05    | 0.761081042  |
| TAF6    | METTL1 | 0.016517855 | 0.528810469  |
| MOSPD3  | METTL1 | 0.017506768 | -0.524819814 |
| PCOLCE  | METTL1 | 0.027078863 | -0.493331593 |
| IMPDH1  | METTL1 | 0.001746104 | -0.654373126 |
| LSM5    | METTL1 | 1.03E-06    | 0.862121238  |
| C1GALT1 | METTL1 | 5.78E-05    | 0.776017108  |
| PLOD3   | METTL1 | 0.010380484 | -0.55911418  |
| RPA3    | METTL1 | 1.59E-07    | 0.889178016  |
| NRF1    | METTL1 | 1.32E-06    | 0.857898821  |
| TSPAN13 | METTL1 | 0.001327853 | 0.666634309  |
| AHR     | METTL1 | 0.048545797 | -0.446309798 |
| PSMA2   | METTL1 | 0.005272276 | 0.598846352  |
| MRPL32  | METTL1 | 0.004290673 | 0.610004839  |
| COA1    | METTL1 | 0.014238894 | 0.538794097  |
| URGCP   | METTL1 | 0.008876252 | 0.56873781   |
| AEBP1   | METTL1 | 0.030895233 | 0.483233334  |
| POLD2   | METTL1 | 6.59E-05    | 0.772363174  |
| YKT6    | METTL1 | 0.04161729  | 0.459316525  |
| GALNTL5 | METTL1 | 0.003248251 | 0.62446258   |
| CLIP2   | METTL1 | 0.002456982 | -0.638296247 |
| EIF4H   | METTL1 | 0.032487146 | 0.479309112  |
| LIMK1   | METTL1 | 0.009096154 | -0.567251848 |
| TMEM245 | METTL1 | 4.77E-04    | 0.708087597  |
| MEGF9   | METTL1 | 0.02531613  | -0.49837873  |
| SUSD1   | METTL1 | 0.02433144  | -0.501320118 |
| ENG     | METTL1 | 0.007890556 | -0.575792318 |



|           |        |             |              |
|-----------|--------|-------------|--------------|
| CDC37L1   | METTL1 | 8.10E-04    | 0.687453125  |
| PLGRKT    | METTL1 | 3.81E-05    | 0.787206555  |
| KDM4C     | METTL1 | 2.46E-06    | 0.847036219  |
| NCS1      | METTL1 | 0.03957753  | -0.463463092 |
| TESK1     | METTL1 | 0.003323748 | -0.623294894 |
| EDF1      | METTL1 | 0.012983494 | 0.544856311  |
| PIP5K1B   | METTL1 | 0.002315016 | 0.641163035  |
| PTGDS     | METTL1 | 0.012704003 | -0.546269937 |
| ABCA2     | METTL1 | 0.040207655 | -0.462164818 |
| UBE2R2    | METTL1 | 0.011365865 | -0.553408514 |
| ZFAND5    | METTL1 | 0.039304577 | -0.464030445 |
| HPS1      | METTL1 | 0.034102215 | -0.475478573 |
| RASSF4    | METTL1 | 0.010171356 | -0.560381285 |
| RAB11FIP2 | METTL1 | 5.44E-04    | 0.703147537  |
| EIF3A     | METTL1 | 0.010661693 | 0.557442604  |
| DDX50     | METTL1 | 7.13E-06    | 0.826334906  |
| ATE1      | METTL1 | 0.032551285 | 0.479154185  |
| PLEKHA1   | METTL1 | 0.038145935 | 0.466473331  |
| UNC5B     | METTL1 | 0.042676648 | -0.457224694 |
| SPOCK2    | METTL1 | 0.016005525 | 0.530953732  |
| PPP3CB    | METTL1 | 0.022641274 | 0.506596163  |
| CCSER2    | METTL1 | 0.002814346 | 0.631648242  |
| SFXN3     | METTL1 | 1.02E-05    | -0.818646853 |
| FBXW4     | METTL1 | 0.021030308 | 0.511924265  |
| NPM3      | METTL1 | 1.17E-05    | 0.815694031  |
| ARHGAP21  | METTL1 | 0.012323821 | -0.548233721 |
| CPEB3     | METTL1 | 0.035212005 | -0.472927731 |
| FBXL15    | METTL1 | 0.001090693 | -0.675119786 |
| GTPBP4    | METTL1 | 2.39E-04    | 0.73263893   |
| BCCIP     | METTL1 | 0.004587517 | 0.606425487  |
| SH3PXD2A  | METTL1 | 0.009971743 | 0.561610638  |
| EBF3      | METTL1 | 0.012101648 | 0.549404107  |
| GLRX3     | METTL1 | 0.037008683 | 0.468927784  |
| FAM208B   | METTL1 | 7.21E-04    | 0.692157319  |
| SMC3      | METTL1 | 0.001200226 | 0.671025506  |
| TFAM      | METTL1 | 2.51E-05    | 0.797758774  |
| CUL2      | METTL1 | 0.018208342 | 0.522096728  |
| RPL28     | METTL1 | 3.10E-05    | 0.7924979    |
| ZMIZ1     | METTL1 | 0.002842293 | -0.631158591 |
| ZNHIT3    | METTL1 | 6.68E-06    | 0.827684033  |
| RPL19     | METTL1 | 1.60E-04    | 0.745833868  |
| FBXL20    | METTL1 | 0.045800299 | -0.451281355 |
| RAD51C    | METTL1 | 0.00928969  | 0.56596806   |
| TRIM37    | METTL1 | 0.001088324 | 0.675212096  |
| P2RX1     | METTL1 | 0.049479397 | -0.444668409 |
| DHX40     | METTL1 | 0.011998308 | 0.549954419  |
| TUBD1     | METTL1 | 0.011344368 | 0.553528628  |
| RPS6KB1   | METTL1 | 0.002675681 | 0.634139373  |
| CDK5RAP3  | METTL1 | 0.00348446  | 0.620880783  |
| CBX1      | METTL1 | 0.01373724  | 0.54116276   |
| GALK1     | METTL1 | 0.00112355  | -0.673856567 |
| CAMTA2    | METTL1 | 0.001454829 | -0.662604664 |
| SLC25A11  | METTL1 | 0.011937827 | -0.55027828  |
| RASD1     | METTL1 | 0.004796355 | -0.604020323 |

|          |        |             |              |
|----------|--------|-------------|--------------|
| RAI1     | METTL1 | 0.005964379 | -0.591969819 |
| NUP88    | METTL1 | 5.52E-05    | 0.777284677  |
| C1QBP    | METTL1 | 0.02434219  | 0.501287504  |
| BLMH     | METTL1 | 0.007674716 | 0.577432426  |
| CPD      | METTL1 | 0.00945687  | -0.564876515 |
| DDX5     | METTL1 | 1.97E-06    | 0.851019707  |
| CCL7     | METTL1 | 7.54E-05    | 0.768557849  |
| PEX12    | METTL1 | 1.07E-07    | 0.894167448  |
| NAGLU    | METTL1 | 0.045716408 | -0.451436831 |
| MLX      | METTL1 | 0.024431161 | -0.501018001 |
| ABI3     | METTL1 | 0.033714681 | -0.476384572 |
| PPP1R9B  | METTL1 | 0.00481058  | -0.603859667 |
| COL1A1   | METTL1 | 1.21E-04    | 0.754411122  |
| MRPL27   | METTL1 | 0.009686173 | 0.563404613  |
| ALOX12   | METTL1 | 8.52E-04    | -0.685392959 |
| SMURF2   | METTL1 | 0.027525461 | 0.492094148  |
| DUSP3    | METTL1 | 7.44E-04    | -0.690899356 |
| PRKAR1A  | METTL1 | 0.002753092 | -0.632735778 |
| RANGRF   | METTL1 | 0.001634025 | 0.657393423  |
| MYH3     | METTL1 | 0.008452914 | 0.571685044  |
| TMEM104  | METTL1 | 0.001654248 | -0.656835871 |
| ALDOC    | METTL1 | 3.37E-05    | 0.790381211  |
| OCIAD1   | METTL1 | 4.73E-04    | 0.708404503  |
| DCUN1D4  | METTL1 | 0.007289647 | 0.580454542  |
| KIAA1211 | METTL1 | 0.031528488 | -0.481653756 |
| NFKB1    | METTL1 | 2.66E-04    | 0.729054543  |
| UBE2D3   | METTL1 | 0.047606072 | 0.44798658   |
| NDUFC1   | METTL1 | 8.97E-04    | 0.683309193  |
| INPP4B   | METTL1 | 0.02690953  | 0.493804991  |
| IL2      | METTL1 | 4.28E-04    | 0.712120592  |
| RPL34    | METTL1 | 4.93E-05    | 0.780357383  |
| GAR1     | METTL1 | 8.31E-06    | 0.823100842  |
| CLCN3    | METTL1 | 0.024147126 | 0.501881107  |
| TRIM2    | METTL1 | 0.029351328 | 0.487193605  |
| SLC2A9   | METTL1 | 0.030111733 | -0.485223185 |
| FBXW7    | METTL1 | 0.007663916 | 0.577515483  |
| STIM2    | METTL1 | 0.00483959  | 0.603533226  |
| MFSD10   | METTL1 | 0.008188515 | -0.573587412 |
| GLRB     | METTL1 | 1.97E-04    | 0.739023868  |
| SNX25    | METTL1 | 6.67E-04    | 0.695206314  |
| LRP2BP   | METTL1 | 0.027965482 | 0.490890289  |
| CTSC     | METTL1 | 0.041407103 | -0.459736446 |
| FNBP4    | METTL1 | 0.039755045 | 0.463095741  |
| SC5D     | METTL1 | 3.93E-06    | 0.838271081  |
| DNAJC4   | METTL1 | 0.010841145 | -0.556394506 |
| SNX15    | METTL1 | 0.005128005 | -0.600372654 |
| DTX4     | METTL1 | 0.003682343 | 0.618032109  |
| OSBP     | METTL1 | 0.001635836 | 0.657343254  |
| UNC93B1  | METTL1 | 0.002662832 | -0.63437562  |
| PUS3     | METTL1 | 0.004453703 | 0.608014578  |
| PPP6R3   | METTL1 | 0.013016654 | 0.544690228  |
| MS4A6A   | METTL1 | 0.019712382 | -0.516530182 |
| ST3GAL4  | METTL1 | 0.001563038 | -0.659397529 |
| CCND1    | METTL1 | 0.040176446 | 0.462228747  |

|          |        |             |              |
|----------|--------|-------------|--------------|
| CCDC86   | METTL1 | 0.001695453 | 0.655717304  |
| PRPF19   | METTL1 | 0.004767621 | 0.604346059  |
| TRIM3    | METTL1 | 0.020272372 | -0.514544042 |
| UPK2     | METTL1 | 0.045379128 | 0.452064139  |
| PDHX     | METTL1 | 0.042279472 | 0.458004215  |
| COMMD9   | METTL1 | 0.008021744 | -0.574813289 |
| SLC15A3  | METTL1 | 0.002614195 | -0.635278548 |
| CD5      | METTL1 | 0.010366838 | 0.559196226  |
| MDK      | METTL1 | 0.048347069 | -0.446662306 |
| AMBRA1   | METTL1 | 6.21E-04    | 0.698024015  |
| SLC22A18 | METTL1 | 0.006442833 | -0.587590491 |
| SLC35F2  | METTL1 | 0.002960201 | 0.629135879  |
| C11orf58 | METTL1 | 2.63E-06    | 0.845882038  |
| PITPNM1  | METTL1 | 0.014873566 | -0.535891773 |
| RPS13    | METTL1 | 1.11E-04    | 0.757101007  |
| AIP      | METTL1 | 0.001167442 | 0.67221678   |
| TCIRG1   | METTL1 | 8.03E-05    | -0.766746808 |
| CHKA     | METTL1 | 0.023525117 | -0.503799662 |
| HPS5     | METTL1 | 0.012786146 | 0.545851881  |
| VWF      | METTL1 | 0.012040963 | -0.549726808 |
| PPFIBP1  | METTL1 | 0.024453311 | 0.50095103   |
| CD69     | METTL1 | 1.92E-05    | 0.804295073  |
| PRDM4    | METTL1 | 3.81E-05    | 0.78723355   |
| CLEC2B   | METTL1 | 0.009882591 | 0.562166162  |
| CORO1C   | METTL1 | 0.00417181  | -0.611495714 |
| CAMKK2   | METTL1 | 0.007213868 | -0.581064603 |
| BIN2     | METTL1 | 0.021316128 | -0.510955823 |
| IL23A    | METTL1 | 0.010212923 | 0.56012776   |
| BCL7A    | METTL1 | 0.00454832  | 0.606886961  |
| RSRC2    | METTL1 | 0.004449205 | 0.608068679  |
| LIN7A    | METTL1 | 0.006786441 | -0.584607326 |
| KRT18    | METTL1 | 7.06E-04    | 0.692957574  |
| PPM1H    | METTL1 | 0.017724413 | -0.523965854 |
| METAP2   | METTL1 | 1.35E-05    | 0.812388853  |
| SLC6A12  | METTL1 | 0.029987228 | -0.485543118 |
| MAGOHB   | METTL1 | 5.79E-06    | 0.830631191  |
| ITFG2    | METTL1 | 0.001021549 | 0.67788651   |
| PARP11   | METTL1 | 0.013864914 | 0.540553394  |
| SH2B3    | METTL1 | 0.011088432 | -0.554973024 |
| AKAP3    | METTL1 | 0.001313088 | 0.667123672  |
| DUSP16   | METTL1 | 0.001877439 | 0.651034124  |
| ALDH2    | METTL1 | 0.036143698 | -0.470834177 |
| CDKN1B   | METTL1 | 2.70E-04    | 0.728452248  |
| LTBR     | METTL1 | 0.002016777 | -0.647699034 |
| CDK2AP1  | METTL1 | 0.006563707 | -0.586526515 |
| RASAL1   | METTL1 | 0.032224977 | 0.479944877  |
| GTF2H3   | METTL1 | 0.002562152 | 0.636260348  |
| SLC38A1  | METTL1 | 0.005800378 | 0.593537455  |
| VDR      | METTL1 | 0.040791005 | -0.460976881 |
| TBC1D30  | METTL1 | 0.003196988 | -0.62526836  |
| CAND1    | METTL1 | 0.003370518 | 0.62258252   |
| CNOT2    | METTL1 | 0.034104851 | 0.475472438  |
| TIMELESS | METTL1 | 1.72E-04    | 0.743510564  |
| KRR1     | METTL1 | 1.81E-06    | 0.852584787  |

|           |        |             |              |
|-----------|--------|-------------|--------------|
| MRPL51    | METTL1 | 0.008306203 | 0.57273454   |
| GAPDH     | METTL1 | 0.036257392 | -0.470581588 |
| NOP2      | METTL1 | 8.52E-04    | 0.685401743  |
| ACRBP     | METTL1 | 0.014613132 | -0.537070436 |
| UHRF1BP1L | METTL1 | 0.01722766  | -0.525927451 |
| COPS7A    | METTL1 | 0.027006603 | -0.493533322 |
| USP5      | METTL1 | 0.02241558  | 0.507324115  |
| ENO2      | METTL1 | 0.007315648 | 0.580246421  |
| C12orf57  | METTL1 | 5.59E-05    | 0.776952817  |
| GOLT1B    | METTL1 | 0.003604983 | 0.619130285  |
| LDHB      | METTL1 | 2.70E-05    | 0.795944235  |
| COX6A1    | METTL1 | 0.005579822 | 0.595704191  |
| TDP2      | METTL1 | 0.028807202 | 0.488628334  |
| RWDD1     | METTL1 | 3.71E-04    | 0.717280542  |
| RSPH4A    | METTL1 | 0.013672271 | 0.541474597  |
| SMIM8     | METTL1 | 0.004789518 | 0.60409768   |
| MCM9      | METTL1 | 0.005398084 | 0.597543202  |
| FAM184A   | METTL1 | 0.040581242 | 0.461402521  |
| RNGTT     | METTL1 | 0.001390193 | 0.664617269  |
| SERINC1   | METTL1 | 0.002610384 | 0.635349876  |
| HINT3     | METTL1 | 0.046469171 | 0.450049498  |
| SRSF3     | METTL1 | 2.66E-05    | 0.796382513  |
| PHACTR1   | METTL1 | 0.011359643 | 0.55344326   |
| CD83      | METTL1 | 1.26E-04    | 0.753167699  |
| MDN1      | METTL1 | 0.010327214 | 0.55943496   |
| BACH2     | METTL1 | 0.002743712 | 0.632904093  |
| BAG2      | METTL1 | 0.001076939 | 0.675658127  |
| KHDRBS2   | METTL1 | 0.009697701 | 0.563331367  |
| CCNC      | METTL1 | 0.018107352 | 0.522483485  |
| PTP4A1    | METTL1 | 0.010668939 | 0.557400007  |
| ASCC3     | METTL1 | 0.033863882 | 0.476034804  |
| WASF1     | METTL1 | 0.001920607 | 0.649979335  |
| ALDH5A1   | METTL1 | 0.019825144 | 0.51612666   |
| RPS12     | METTL1 | 3.07E-05    | 0.79274918   |
| B3GAT2    | METTL1 | 0.022801771 | 0.506081995  |
| HBS1L     | METTL1 | 0.002150328 | 0.644678742  |
| PEX7      | METTL1 | 1.85E-04    | 0.741085871  |
| ZBTB24    | METTL1 | 4.23E-05    | 0.784460699  |
| HECA      | METTL1 | 3.95E-04    | 0.715061648  |
| HSD17B8   | METTL1 | 0.012303824 | 0.548338364  |
| CCR6      | METTL1 | 5.53E-05    | 0.777240476  |
| SLC22A2   | METTL1 | 1.97E-04    | 0.739023868  |
| PHF1      | METTL1 | 0.002719734 | 0.633336533  |
| CUTA      | METTL1 | 2.96E-04    | 0.725286094  |
| QKI       | METTL1 | 0.034647921 | -0.474216313 |
| TFEB      | METTL1 | 0.027972319 | -0.490871702 |
| MRPL2     | METTL1 | 0.011515901 | 0.552575276  |
| DNPH1     | METTL1 | 0.034451675 | 0.474668447  |
| EXOC2     | METTL1 | 4.41E-04    | 0.71096886   |
| COX7A2    | METTL1 | 5.32E-04    | 0.703967769  |
| FAM46A    | METTL1 | 0.009567265 | -0.564164309 |
| HARS2     | METTL1 | 0.010566572 | 0.558003983  |
| NUDT12    | METTL1 | 0.04330864  | 0.455995773  |
| CEP72     | METTL1 | 0.025258098 | 0.498549548  |

|          |        |             |              |
|----------|--------|-------------|--------------|
| HMGCS1   | METTL1 | 1.24E-04    | 0.753838226  |
| DAP      | METTL1 | 0.002405851 | -0.639312444 |
| NNT      | METTL1 | 0.04339519  | 0.455828554  |
| HSPA9    | METTL1 | 1.32E-04    | 0.751942165  |
| MRPS27   | METTL1 | 0.033807107 | 0.476167757  |
| PFDN1    | METTL1 | 0.014831926 | 0.536079102  |
| IK       | METTL1 | 0.001052577 | 0.676626013  |
| FAF2     | METTL1 | 0.0109614   | 0.555699996  |
| CLK4     | METTL1 | 3.95E-04    | 0.715040553  |
| ITK      | METTL1 | 0.002660802 | 0.63441302   |
| RNF130   | METTL1 | 9.77E-04    | -0.679737453 |
| THG1L    | METTL1 | 0.025009863 | 0.499283749  |
| ARSB     | METTL1 | 0.002349106 | -0.640461542 |
| TTC1     | METTL1 | 0.044658223 | 0.453417079  |
| RASGRF2  | METTL1 | 0.048834625 | 0.445799435  |
| CCNG1    | METTL1 | 0.003308615 | 0.623527168  |
| POLR3G   | METTL1 | 0.022644473 | 0.506585889  |
| SUB1     | METTL1 | 0.001540295 | 0.660055751  |
| PDE4D    | METTL1 | 0.004657547 | 0.60560907   |
| BRIX1    | METTL1 | 0.004383318 | 0.608866317  |
| SKP1     | METTL1 | 1.85E-04    | 0.74105958   |
| PPP2CA   | METTL1 | 6.87E-04    | 0.6940806    |
| NR3C1    | METTL1 | 0.009077126 | 0.567379264  |
| TRIM23   | METTL1 | 8.60E-04    | 0.685014446  |
| H2AFY    | METTL1 | 0.034531039 | -0.474485359 |
| BNIP1    | METTL1 | 0.001979481 | 0.648572341  |
| HRH2     | METTL1 | 0.004309004 | -0.609777965 |
| CRBN     | METTL1 | 0.001144287 | 0.673075222  |
| HRG      | METTL1 | 0.025400526 | 0.498130862  |
| CD86     | METTL1 | 0.02693504  | -0.493733525 |
| NIT2     | METTL1 | 0.009441257 | 0.564977787  |
| FAM162A  | METTL1 | 1.62E-06    | 0.854462416  |
| PCCB     | METTL1 | 0.010096994 | 0.56083695   |
| UBE3A    | METTL1 | 0.015065758 | 0.53503255   |
| ARMC8    | METTL1 | 0.010647972 | 0.557523333  |
| CEP70    | METTL1 | 0.00462531  | 0.605983626  |
| SERPINI2 | METTL1 | 0.011009764 | -0.555422422 |
| PFKFB4   | METTL1 | 0.012346238 | -0.548116583 |
| HES1     | METTL1 | 6.01E-04    | 0.699277045  |
| GNAI2    | METTL1 | 0.002071216 | -0.646448262 |
| USP9Y    | METTL1 | 1.97E-04    | 0.739023868  |
| RPL24    | METTL1 | 2.31E-04    | 0.733765267  |
| FXR1     | METTL1 | 0.001619701 | 0.657791866  |
| BBX      | METTL1 | 0.002732502 | 0.633105867  |
| IFT57    | METTL1 | 0.001338108 | 0.666297087  |
| GNB4     | METTL1 | 0.042512328 | -0.457546517 |
| HHLA2    | METTL1 | 0.001752081 | 0.654216681  |
| MORC1    | METTL1 | 0.042225796 | -0.458109996 |
| UMPS     | METTL1 | 0.026498005 | 0.494965338  |
| NCBP2    | METTL1 | 5.58E-06    | 0.831359136  |
| C3orf52  | METTL1 | 0.037449404 | 0.467969744  |
| SLC41A3  | METTL1 | 0.001913411 | 0.650153798  |
| ATP6V1A  | METTL1 | 0.008816431 | -0.56914723  |
| PODXL2   | METTL1 | 0.023952654 | 0.502476702  |

|              |        |             |              |
|--------------|--------|-------------|--------------|
| NEK11        | METTL1 | 1.44E-04    | 0.749045275  |
| MAPKAPK3     | METTL1 | 0.039233784 | -0.464178092 |
| WDR48        | METTL1 | 2.14E-04    | 0.736341829  |
| RRP9         | METTL1 | 1.25E-04    | 0.753415787  |
| ABCC5        | METTL1 | 0.048752404 | -0.445944485 |
| ABHD14B      | METTL1 | 0.017933305 | 0.523154086  |
| EIF1B        | METTL1 | 0.001088286 | 0.675213577  |
| ABHD14A-ACY1 | METTL1 | 5.15E-04    | 0.705216353  |
| KLHL24       | METTL1 | 0.043173549 | 0.456257291  |
| ZBTB47       | METTL1 | 0.002353236 | -0.640377116 |
| TNNC1        | METTL1 | 0.0349286   | 0.473573108  |
| EEF1B2       | METTL1 | 9.31E-05    | 0.762419569  |
| ADAM23       | METTL1 | 0.003558212 | 0.619803742  |
| DGUOK        | METTL1 | 5.09E-05    | 0.779491952  |
| TTL          | METTL1 | 0.039082329 | -0.464494664 |
| NCL          | METTL1 | 6.36E-07    | 0.869678633  |
| EPB41L5      | METTL1 | 2.05E-05    | 0.802724702  |
| TP53I3       | METTL1 | 0.038063904 | -0.466648455 |
| DNAJC27      | METTL1 | 0.002018695 | 0.647654484  |
| CYTIP        | METTL1 | 0.00969286  | 0.563362118  |
| ACVR1        | METTL1 | 0.007252598 | 0.580752154  |
| SLC30A3      | METTL1 | 0.0011221   | 0.673911658  |
| GTF3C2       | METTL1 | 0.014799336 | 0.536226015  |
| PSMD14       | METTL1 | 0.008890597 | 0.568639968  |
| GPR75-ASB3   | METTL1 | 0.028412203 | 0.489683252  |
| SPTBN1       | METTL1 | 0.00478175  | 0.604185692  |
| RTN4         | METTL1 | 0.007339106 | -0.580059168 |
| HTRA2        | METTL1 | 1.67E-04    | 0.744504928  |
| LOXL3        | METTL1 | 0.014699623 | -0.536677139 |
| DOK1         | METTL1 | 0.020121336 | -0.515075379 |
| CCDC88A      | METTL1 | 0.011318849 | -0.553671456 |
| LANCL1       | METTL1 | 0.005242938 | 0.599153915  |
| WDR75        | METTL1 | 0.012354495 | 0.548073476  |
| USP34        | METTL1 | 0.009747328 | 0.563016848  |
| EHBP1        | METTL1 | 4.97E-07    | 0.873401008  |
| COQ10B       | METTL1 | 0.006702283 | 0.585326322  |
| SF3B1        | METTL1 | 0.001156082 | 0.672636125  |
| PDCL3        | METTL1 | 0.012842694 | 0.54556535   |
| MOB4         | METTL1 | 0.005234522 | 0.599242404  |
| HSPE1        | METTL1 | 1.43E-05    | 0.81121473   |
| KDM3A        | METTL1 | 0.019597775 | 0.51694219   |
| SMYD1        | METTL1 | 0.003660778 | 0.618336299  |
| CNPPD1       | METTL1 | 0.014621841 | 0.537030747  |
| UXS1         | METTL1 | 3.66E-04    | 0.717759416  |
| PPP1R7       | METTL1 | 0.01596638  | 0.531119745  |
| HPCAL1       | METTL1 | 0.043824726 | -0.455002453 |
| ODC1         | METTL1 | 0.0026264   | 0.635050661  |
| CEBPZ        | METTL1 | 9.45E-06    | 0.820363093  |
| DCAF17       | METTL1 | 0.011182964 | 0.554436409  |
| RAB3GAP1     | METTL1 | 3.58E-08    | 0.90680614   |
| RMDN2        | METTL1 | 0.029982316 | 0.485555761  |
| DLX2         | METTL1 | 0.04265832  | -0.457260542 |
| DARS         | METTL1 | 2.69E-04    | 0.728601199  |
| SRSF7        | METTL1 | 9.19E-04    | 0.682310324  |

|          |        |             |              |
|----------|--------|-------------|--------------|
| PLCL1    | METTL1 | 0.008371873 | 0.572262915  |
| PNO1     | METTL1 | 9.27E-06    | 0.820758625  |
| ORC4     | METTL1 | 6.15E-05    | 0.77430019   |
| THADA    | METTL1 | 1.02E-04    | 0.759825781  |
| TRAK2    | METTL1 | 9.69E-05    | 0.761236793  |
| C2orf42  | METTL1 | 0.049252966 | 0.445064309  |
| ARID3A   | METTL1 | 0.001871263 | -0.651186673 |
| SUMO1    | METTL1 | 0.001733182 | 0.654712929  |
| ATP6V1B1 | METTL1 | 0.047794457 | 0.447648417  |
| NFE2L2   | METTL1 | 6.59E-04    | 0.695691488  |
| SPR      | METTL1 | 0.017215881 | -0.52597451  |
| EPHA4    | METTL1 | 0.003301932 | 0.623630021  |
| FARSB    | METTL1 | 0.008297521 | 0.572797119  |
| ALMS1    | METTL1 | 0.028791531 | 0.48866997   |
| GPX7     | METTL1 | 0.022680192 | 0.50647122   |
| CACYBP   | METTL1 | 0.006968794 | 0.583074161  |
| RALGPS2  | METTL1 | 0.002728639 | 0.633175563  |
| ICMT     | METTL1 | 0.041165944 | -0.460220278 |
| RPL22    | METTL1 | 7.56E-05    | 0.76847642   |
| QSOX1    | METTL1 | 8.06E-04    | -0.687652741 |
| PHF13    | METTL1 | 0.02445659  | -0.500941116 |
| PARK7    | METTL1 | 0.011502217 | 0.552650904  |
| HDAC1    | METTL1 | 0.003480444 | 0.620939973  |
| SWT1     | METTL1 | 0.029664803 | 0.486376506  |
| KIAA2013 | METTL1 | 0.00471914  | -0.604899344 |
| MIIP     | METTL1 | 0.008015363 | -0.574860608 |
| NCF2     | METTL1 | 0.041506024 | -0.459538612 |
| SLC35D1  | METTL1 | 0.007647569 | 0.577641373  |
| PLA2G4A  | METTL1 | 0.021243896 | -0.511199587 |
| PRDM2    | METTL1 | 0.010927945 | 0.555892584  |
| BCAS2    | METTL1 | 3.06E-06    | 0.843049298  |
| SRSF11   | METTL1 | 0.018914767 | 0.519438244  |
| AGMAT    | METTL1 | 0.003092875 | 0.626938487  |
| TTF2     | METTL1 | 0.035461307 | 0.472363353  |
| ADPRHL2  | METTL1 | 0.005963138 | 0.591981549  |
| MAP7D1   | METTL1 | 0.026671544 | -0.494474302 |
| EXOC8    | METTL1 | 0.043379785 | 0.455858298  |
| MYCL     | METTL1 | 0.015937725 | -0.531241474 |
| RLF      | METTL1 | 1.17E-04    | 0.755584894  |
| KMO      | METTL1 | 0.017620111 | 0.524374042  |
| ACADM    | METTL1 | 0.026497072 | 0.494967985  |
| SLAMF1   | METTL1 | 0.009824775 | 0.56252861   |
| CD48     | METTL1 | 2.15E-04    | 0.736186857  |
| PADI2    | METTL1 | 0.034143053 | -0.475383567 |
| RPF1     | METTL1 | 2.03E-04    | 0.738128619  |
| KDM5B    | METTL1 | 7.76E-05    | 0.767711831  |
| CTBS     | METTL1 | 0.044416428 | -0.453874626 |
| RGS4     | METTL1 | 0.001026409 | 0.677686965  |
| ZNHIT6   | METTL1 | 0.001041755 | 0.677062043  |
| PLA2G2D  | METTL1 | 0.033014848 | 0.478041487  |
| CR2      | METTL1 | 0.00460236  | 0.606251592  |
| APH1A    | METTL1 | 0.013961486 | 0.540095469  |
| SLC2A1   | METTL1 | 0.033582762 | 0.476694834  |
| EBNA1BP2 | METTL1 | 0.006686054 | 0.585465818  |

|              |        |             |              |
|--------------|--------|-------------|--------------|
| ATP6V0B      | METTL1 | 7.94E-04    | -0.688276535 |
| CNN3         | METTL1 | 0.001073462 | 0.675795132  |
| F3           | METTL1 | 0.034162486 | 0.47533839   |
| VAMP4        | METTL1 | 0.005412919 | 0.597391186  |
| DPH5         | METTL1 | 3.32E-05    | 0.790755981  |
| DIEXF        | METTL1 | 0.001245126 | 0.669437716  |
| SYF2         | METTL1 | 0.008377268 | 0.572224301  |
| RPA2         | METTL1 | 0.014508479 | 0.537548835  |
| SLC5A9       | METTL1 | 0.007668679 | -0.577478845 |
| RCN2         | METTL1 | 2.42E-05    | 0.798657086  |
| CHRN4        | METTL1 | 6.03E-04    | 0.699156051  |
| CTSD         | METTL1 | 3.53E-04    | -0.719073527 |
| STAG1        | METTL1 | 0.007809197 | 0.576406189  |
| A4GNT        | METTL1 | 0.034925919 | -0.473579232 |
| STK11        | METTL1 | 0.047916089 | -0.447430622 |
| RPS25        | METTL1 | 3.85E-04    | 0.7159985    |
| CAMSAP2      | METTL1 | 0.033501053 | 0.476887484  |
| FASTKD2      | METTL1 | 9.97E-06    | 0.819191188  |
| CREB1        | METTL1 | 0.004426549 | 0.608341853  |
| B4GALT6      | METTL1 | 0.032664979 | -0.478880141 |
| USP35        | METTL1 | 0.033214139 | -0.477566876 |
| ELOVL4       | METTL1 | 0.031649226 | 0.481355417  |
| CASP8AP2     | METTL1 | 0.005757617 | 0.593952173  |
| HMG3         | METTL1 | 0.016998925 | 0.526845945  |
| UBE3D        | METTL1 | 0.001846649 | 0.651798928  |
| PHF3         | METTL1 | 0.001157532 | 0.672582401  |
| AKAP7        | METTL1 | 0.027389414 | 0.492469425  |
| RAB32        | METTL1 | 0.005112928 | -0.600534195 |
| ALDH8A1      | METTL1 | 0.008446123 | 0.571733289  |
| MED28        | METTL1 | 0.014564449 | 0.537292635  |
| ZNF430       | METTL1 | 0.004657189 | 0.605613209  |
| FOXO3        | METTL1 | 0.003660489 | -0.618340382 |
| TGIF2        | METTL1 | 0.003830244 | 0.615984742  |
| FAM47E-STBD1 | METTL1 | 0.005043671 | -0.601281326 |
| MFSD1        | METTL1 | 0.020861256 | -0.512501999 |
| KLF12        | METTL1 | 0.008976758 | 0.568054974  |
| UCHL3        | METTL1 | 0.007929833 | 0.575497816  |
| HS1BP3       | METTL1 | 0.005484834 | -0.596659121 |
| SATB2        | METTL1 | 0.005074529 | -0.600947403 |
| UBE2B        | METTL1 | 1.82E-04    | 0.741627766  |
| TJP2         | METTL1 | 0.023652702 | -0.503402886 |
| PIGZ         | METTL1 | 0.013840128 | -0.540671336 |
| FKBP15       | METTL1 | 0.011887002 | -0.550551461 |
| WDR34        | METTL1 | 0.049291698 | 0.444996491  |
| RAB14        | METTL1 | 0.036997469 | 0.468952277  |
| TRIM32       | METTL1 | 0.027384304 | 0.492483549  |
| SLC46A2      | METTL1 | 0.048384584 | -0.446595675 |
| MAPKAP1      | METTL1 | 3.07E-05    | 0.792728348  |
| NR4A3        | METTL1 | 3.99E-04    | 0.714635775  |
| GALNT12      | METTL1 | 0.046647192 | 0.449723935  |
| DENND1A      | METTL1 | 0.00121752  | -0.670408129 |
| ALG2         | METTL1 | 0.005857735 | 0.592985094  |
| CSF3R        | METTL1 | 0.038089785 | -0.466593172 |
| KDSR         | METTL1 | 0.033568773 | 0.476727791  |



|          |        |             |              |
|----------|--------|-------------|--------------|
| YLPM1    | METTL1 | 0.002671107 | 0.634223367  |
| FCF1     | METTL1 | 0.00482894  | 0.603652883  |
| NEK9     | METTL1 | 7.33E-04    | 0.691503169  |
| IFT43    | METTL1 | 0.015596532 | 0.532704568  |
| IRF2BPL  | METTL1 | 0.012451914 | -0.547566669 |
| LTBP2    | METTL1 | 0.046406608 | -0.450164139 |
| DLST     | METTL1 | 0.00439478  | 0.608726846  |
| SLIRP    | METTL1 | 0.003665865 | 0.618264404  |
| NRDE2    | METTL1 | 0.028514102 | 0.489410013  |
| COQ6     | METTL1 | 1.57E-04    | 0.746437249  |
| SUPT7L   | METTL1 | 1.83E-04    | 0.741462691  |
| ATL2     | METTL1 | 0.007525148 | 0.578591214  |
| YPEL5    | METTL1 | 0.003171023 | 0.625680589  |
| LGALS1   | METTL1 | 0.038562362 | -0.46558879  |
| OGFRL1   | METTL1 | 0.009818325 | -0.562569155 |
| GPAM     | METTL1 | 0.032182652 | 0.480047894  |
| CUTC     | METTL1 | 7.93E-06    | 0.824097931  |
| CNNM1    | METTL1 | 0.003202631 | 0.625179127  |
| SMNDC1   | METTL1 | 0.007981523 | 0.575112049  |
| C10orf88 | METTL1 | 0.011756428 | 0.551257644  |
| FAM45A   | METTL1 | 0.010702445 | -0.557203344 |
| SFRP5    | METTL1 | 0.010406168 | 0.558959992  |
| DUSP1    | METTL1 | 0.03644911  | -0.470157049 |
| RCL1     | METTL1 | 2.39E-05    | 0.798982653  |
| CAAP1    | METTL1 | 8.28E-06    | 0.823194733  |
| MOB3B    | METTL1 | 0.003577838 | 0.619520265  |
| INSL4    | METTL1 | 5.65E-04    | 0.701674909  |
| CD274    | METTL1 | 0.008141853 | 0.57392834   |
| MTHFD1L  | METTL1 | 8.13E-04    | 0.687313684  |
| CCDC170  | METTL1 | 0.041376643 | -0.459797436 |
| PLEKHG1  | METTL1 | 1.56E-04    | 0.746675958  |
| MYCT1    | METTL1 | 0.011175331 | -0.554479602 |
| ARAP3    | METTL1 | 0.002398196 | -0.639466126 |
| TNN      | METTL1 | 0.018494206 | 0.521011184  |
| CENPL    | METTL1 | 0.007896989 | 0.575744     |
| GORAB    | METTL1 | 6.42E-06    | 0.828519757  |
| ACAT2    | METTL1 | 0.021747732 | 0.509512799  |
| TCP1     | METTL1 | 0.010781029 | 0.556744041  |
| KCNJ5    | METTL1 | 4.58E-05    | 0.782335282  |
| NUDCD1   | METTL1 | 1.74E-04    | 0.743182479  |
| PLXDC2   | METTL1 | 0.005709239 | -0.594424446 |
| EPC1     | METTL1 | 4.62E-06    | 0.835118576  |
| DNAJC15  | METTL1 | 0.044856993 | 0.453042373  |
| UFM1     | METTL1 | 1.29E-05    | 0.813485014  |
| ELF1     | METTL1 | 0.039508396 | 0.463606506  |
| HSPH1    | METTL1 | 0.01074901  | 0.556930851  |
| ALG5     | METTL1 | 0.022419823 | 0.507310375  |
| EXOSC8   | METTL1 | 1.18E-05    | 0.815493681  |
| ETF1     | METTL1 | 0.019717938 | 0.516510257  |
| TGFB1    | METTL1 | 0.018871276 | -0.519599603 |
| PAIP2    | METTL1 | 0.001739323 | 0.654551188  |
| EGR1     | METTL1 | 0.01655298  | -0.528665488 |
| UTP20    | METTL1 | 0.005933689 | 0.592260456  |
| TMPO     | METTL1 | 0.028674516 | 0.488981422  |

|           |        |             |              |
|-----------|--------|-------------|--------------|
| NFYB      | METTL1 | 3.28E-04    | 0.721678448  |
| APAF1     | METTL1 | 0.042810632 | -0.456962991 |
| DUSP4     | METTL1 | 0.00571786  | 0.594340045  |
| CHRNA2    | METTL1 | 0.005944937 | -0.592153795 |
| PPP3CC    | METTL1 | 0.003524479 | 0.620294039  |
| PDLIM2    | METTL1 | 0.006387306 | -0.588084751 |
| EPHX2     | METTL1 | 0.01538395  | 0.5336292    |
| UBIAD1    | METTL1 | 0.008029228 | 0.574757831  |
| COPS5     | METTL1 | 5.84E-04    | 0.700419418  |
| AKAP1     | METTL1 | 0.00276198  | 0.632576738  |
| COIL      | METTL1 | 6.10E-05    | 0.774503319  |
| SPOP      | METTL1 | 0.010571056 | 0.557977425  |
| TBX4      | METTL1 | 0.003035501 | 0.627878918  |
| NACA3P    | METTL1 | 0.005687331 | 0.594639391  |
| ADCY7     | METTL1 | 0.001569413 | -0.659214464 |
| TSHZ3     | METTL1 | 6.90E-04    | -0.693882424 |
| PYROXD1   | METTL1 | 2.57E-04    | 0.730113232  |
| BCL2L14   | METTL1 | 0.024515561 | 0.500763062  |
| PSPC1     | METTL1 | 0.021052767 | 0.51184779   |
| ZNF549    | METTL1 | 3.26E-05    | 0.79121511   |
| ZSCAN18   | METTL1 | 0.023460629 | 0.504000863  |
| SEC22A    | METTL1 | 5.98E-04    | 0.699469496  |
| DPPA4     | METTL1 | 0.001755069 | 0.654138638  |
| DESI2     | METTL1 | 0.038020844 | 0.466740501  |
| CAT       | METTL1 | 0.009391016 | -0.5653046   |
| ZMYM2     | METTL1 | 0.006445364 | 0.587568044  |
| GJB6      | METTL1 | 5.08E-04    | 0.705741417  |
| TBC1D15   | METTL1 | 1.35E-05    | 0.812453584  |
| ZCCHC17   | METTL1 | 0.024966738 | 0.499411886  |
| POLR3GL   | METTL1 | 0.004364364 | 0.609097621  |
| ZNF639    | METTL1 | 9.28E-04    | 0.681882673  |
| PIK3CA    | METTL1 | 8.73E-06    | 0.822064859  |
| TMEM156   | METTL1 | 4.71E-06    | 0.83475906   |
| CXCR4     | METTL1 | 0.001054631 | 0.676543697  |
| ZRANB3    | METTL1 | 0.009664689 | 0.563541309  |
| SV2C      | METTL1 | 0.028839417 | -0.488542801 |
| RPL21     | METTL1 | 7.28E-05    | 0.769543983  |
| GTF3A     | METTL1 | 2.56E-05    | 0.79728604   |
| RASL11A   | METTL1 | 0.014501857 | -0.537579199 |
| MRPS2     | METTL1 | 0.002626159 | 0.635055154  |
| KIAA1191  | METTL1 | 0.001074622 | 0.675749382  |
| CD244     | METTL1 | 4.51E-04    | -0.710158075 |
| ZC3H7A    | METTL1 | 0.004364595 | 0.609094789  |
| ZNF205    | METTL1 | 0.003518626 | -0.620379502 |
| RPL5      | METTL1 | 1.36E-04    | 0.751018076  |
| ODF2L     | METTL1 | 0.008434609 | 0.571815167  |
| RWDD3     | METTL1 | 3.17E-05    | 0.7919293    |
| ZNF644    | METTL1 | 6.49E-04    | 0.696314117  |
| CCDC18    | METTL1 | 0.021250239 | 0.511178156  |
| RPAP2     | METTL1 | 0.03500602  | 0.473396402  |
| BBS9      | METTL1 | 5.16E-04    | 0.705125097  |
| CBX3      | METTL1 | 0.002349556 | 0.64045233   |
| HNRNPA2B1 | METTL1 | 0.00275302  | 0.632737066  |
| FAM126A   | METTL1 | 0.020693849 | 0.513077792  |

|           |        |             |              |
|-----------|--------|-------------|--------------|
| CCZ1      | METTL1 | 0.02229064  | -0.507729596 |
| GLIPR2    | METTL1 | 8.63E-04    | -0.684892022 |
| CLTA      | METTL1 | 0.024694589 | -0.50022458  |
| RECK      | METTL1 | 0.009681305 | 0.563435565  |
| AKR1D1    | METTL1 | 0.014593377 | 0.53716053   |
| PLAU      | METTL1 | 0.005107718 | 0.600590116  |
| BICC1     | METTL1 | 0.031577244 | -0.481533173 |
| ACADS     | METTL1 | 0.033888191 | -0.47597793  |
| CCDC91    | METTL1 | 1.61E-05    | 0.808471788  |
| WWP1      | METTL1 | 0.009949075 | 0.561751502  |
| EBPL      | METTL1 | 0.014927029 | 0.535651864  |
| OPTN      | METTL1 | 0.037093524 | 0.46874267   |
| ITIH5     | METTL1 | 0.001056062 | 0.67648643   |
| TSFM      | METTL1 | 3.65E-04    | 0.717910217  |
| PFDN5     | METTL1 | 0.024536517 | 0.500699871  |
| ORMDL2    | METTL1 | 0.027723655 | 0.491550044  |
| CDK2      | METTL1 | 0.009018077 | 0.567776059  |
| LRP1      | METTL1 | 0.044208561 | -0.454269509 |
| KBTBD4    | METTL1 | 8.42E-05    | 0.765350391  |
| AMD1      | METTL1 | 0.013699779 | 0.541342421  |
| NDUFAF4   | METTL1 | 7.69E-05    | 0.76796213   |
| MORF4L2   | METTL1 | 0.013580131 | 0.541918907  |
| LPGAT1    | METTL1 | 0.017093975 | -0.526463072 |
| BATF3     | METTL1 | 0.048107897 | -0.447088031 |
| EXOSC9    | METTL1 | 2.14E-05    | 0.801699653  |
| MXD4      | METTL1 | 0.024428896 | -0.501024854 |
| CKS2      | METTL1 | 0.033035612 | 0.477991934  |
| FAM124B   | METTL1 | 0.041337082 | -0.459876702 |
| SLC12A4   | METTL1 | 0.025444144 | -0.498003012 |
| HMGB1P1   | METTL1 | 0.002155573 | 0.644563366  |
| FAM209A   | METTL1 | 0.007371422 | 0.579802018  |
| SNX21     | METTL1 | 0.004862154 | -0.603280439 |
| PREX1     | METTL1 | 0.001904059 | -0.650381316 |
| NCOA3     | METTL1 | 0.012459607 | 0.547526786  |
| NCOA5     | METTL1 | 0.001803636 | 0.652885428  |
| ATP5E     | METTL1 | 0.001772754 | 0.653678972  |
| CHD6      | METTL1 | 0.01210002  | 0.549412746  |
| PLCG1     | METTL1 | 0.030761039 | 0.483571316  |
| SRSF6     | METTL1 | 0.001140203 | 0.673228159  |
| ZNFX1     | METTL1 | 0.018766347 | 0.519990132  |
| STX16     | METTL1 | 0.016228557 | 0.530014047  |
| PMEPA1    | METTL1 | 0.001384481 | 0.664798881  |
| DDX27     | METTL1 | 5.85E-05    | 0.775709545  |
| BCAS4     | METTL1 | 0.039683489 | 0.463243665  |
| FASTKD3   | METTL1 | 0.044123746 | 0.454431043  |
| CHST8     | METTL1 | 0.044962502 | -0.452843995 |
| IQSEC2    | METTL1 | 0.001804341 | -0.652867444 |
| PAIP2B    | METTL1 | 0.004184406 | 0.611336071  |
| SNRNP27   | METTL1 | 0.042709508 | 0.457160452  |
| MPHOSPH10 | METTL1 | 3.25E-05    | 0.791309176  |
| IL17C     | METTL1 | 0.017313754 | -0.525584267 |
| ATP8A1    | METTL1 | 0.004464145 | 0.607889173  |
| LYPD3     | METTL1 | 1.04E-05    | 0.818254569  |
| F13A1     | METTL1 | 0.004417274 | -0.608454014 |

|          |        |             |              |
|----------|--------|-------------|--------------|
| SLC17A3  | METTL1 | 0.011811617 | 0.550958396  |
| SERPINB6 | METTL1 | 0.041681391 | -0.459188788 |
| OARD1    | METTL1 | 5.50E-06    | 0.831665849  |
| AARS2    | METTL1 | 0.049584178 | 0.444485674  |
| ZNF391   | METTL1 | 0.047971661 | 0.447331256  |
| RPS10    | METTL1 | 5.23E-05    | 0.778762093  |
| TBCC     | METTL1 | 0.040066136 | 0.462455016  |
| TREM1    | METTL1 | 0.038177259 | -0.466406535 |
| MEA1     | METTL1 | 0.006531764 | 0.586806115  |
| GLO1     | METTL1 | 2.87E-04    | 0.726392702  |
| RIOK1    | METTL1 | 3.10E-06    | 0.84282467   |
| NUP153   | METTL1 | 0.038171071 | 0.466419726  |
| EEF1E1   | METTL1 | 6.67E-04    | 0.695216397  |
| LRRFIP1  | METTL1 | 0.009312486 | -0.565818286 |
| SH3TC1   | METTL1 | 0.015121609 | -0.534784514 |
| BBS2     | METTL1 | 0.00755524  | 0.578356568  |
| C16orf70 | METTL1 | 0.032345133 | -0.479652995 |
| PIWIL1   | METTL1 | 0.004771828 | 0.604298269  |
| GPR18    | METTL1 | 4.34E-05    | 0.783754365  |
| UPF3B    | METTL1 | 0.007145702 | 0.58161786   |
| RNF113A  | METTL1 | 0.004380815 | 0.608896818  |
| NDUFA1   | METTL1 | 0.006896004 | 0.583682166  |
| FAM193A  | METTL1 | 0.046737284 | 0.44955954   |
| HS3ST3B1 | METTL1 | 0.01339474  | 0.542820295  |
| MRPS7    | METTL1 | 0.003179769 | 0.625541421  |
| TTF1     | METTL1 | 0.0338478   | 0.476072446  |
| GTF3C4   | METTL1 | 2.13E-04    | 0.736492828  |
| DDX31    | METTL1 | 0.004284564 | 0.610080622  |
| KIR2DL1  | METTL1 | 0.036158117 | -0.470802109 |
| PPP1R12C | METTL1 | 0.036344963 | -0.470387454 |
| MBOAT7   | METTL1 | 1.22E-04    | -0.754224748 |
| OPRL1    | METTL1 | 0.02207909  | -0.508420298 |
| PPDPF    | METTL1 | 0.014686783 | -0.536735406 |
| INSIG2   | METTL1 | 9.50E-05    | 0.761823379  |
| POLR1B   | METTL1 | 7.34E-04    | 0.691413965  |
| CCDC93   | METTL1 | 0.017253648 | 0.525823715  |
| GTF2F1   | METTL1 | 0.038703719 | -0.465290216 |
| RPL23    | METTL1 | 6.96E-05    | 0.770833278  |
| SNRPD2   | METTL1 | 8.90E-06    | 0.821644664  |
| VASP     | METTL1 | 0.003316657 | -0.623403629 |
| SDCBP2   | METTL1 | 0.008540981 | 0.571062167  |
| CD93     | METTL1 | 0.019617347 | -0.516871693 |
| CENPB    | METTL1 | 0.001772901 | -0.653675175 |
| DTD1     | METTL1 | 0.012519261 | 0.547218181  |
| ZNF133   | METTL1 | 0.030413925 | 0.484450954  |
| SNRPB2   | METTL1 | 0.001036351 | 0.677281232  |
| FAM110A  | METTL1 | 0.02309251  | -0.505157842 |
| SIRPD    | METTL1 | 0.040101786 | -0.462381836 |
| NCLN     | METTL1 | 0.017356563 | -0.525414129 |
| HNRNPR   | METTL1 | 6.66E-04    | 0.695272981  |
| ARMCX5   | METTL1 | 1.19E-04    | 0.754954218  |
| DYNLRB1  | METTL1 | 0.023933759 | 0.502534773  |
| ERGIC3   | METTL1 | 0.004424987 | 0.60836072   |
| ROMO1    | METTL1 | 0.004379207 | 0.608916423  |

|           |        |             |              |
|-----------|--------|-------------|--------------|
| MMP24-AS1 | METTL1 | 1.50E-05    | -0.810111449 |
| UROD      | METTL1 | 0.014264759 | 0.538673803  |
| CAPNS1    | METTL1 | 0.010165579 | -0.560416591 |
| PDCD2L    | METTL1 | 0.003700911 | 0.617771369  |
| RBM42     | METTL1 | 0.04502397  | -0.452728588 |
| UBA2      | METTL1 | 1.27E-05    | 0.813816885  |
| COX6B1    | METTL1 | 0.01706555  | 0.526577394  |
| CCR7      | METTL1 | 1.25E-05    | 0.814251613  |
| FRMD8     | METTL1 | 0.037616981 | -0.467607762 |
| IRF3      | METTL1 | 0.039248639 | 0.464147094  |
| PRMT1     | METTL1 | 0.006836145 | 0.584186122  |
| SCAF1     | METTL1 | 0.040190401 | -0.462200155 |
| SBDS      | METTL1 | 6.42E-04    | 0.696729181  |
| HTN1      | METTL1 | 1.89E-05    | 0.804653767  |
| PRKCG     | METTL1 | 0.005679955 | 0.594711917  |
| NSRP1     | METTL1 | 6.22E-07    | 0.870018891  |
| DNAJC8    | METTL1 | 0.015678507 | 0.53235072   |
| EMG1      | METTL1 | 2.68E-05    | 0.796155083  |
| UXT       | METTL1 | 3.02E-05    | 0.793176669  |
| CFP       | METTL1 | 0.002617989 | -0.635207619 |
| ATG14     | METTL1 | 0.042840262 | 0.456905203  |
| KTN1      | METTL1 | 0.042046228 | 0.458464634  |
| ZBTB1     | METTL1 | 9.39E-04    | 0.681383991  |
| PLEKHG3   | METTL1 | 0.011134618 | -0.554710389 |
| SLC10A3   | METTL1 | 0.031696065 | -0.481239917 |
| MAP2K2    | METTL1 | 0.016779706 | -0.52773556  |
| HNRNPH2   | METTL1 | 0.004228279 | 0.610783113  |
| NXF5      | METTL1 | 0.022831703 | 0.505986421  |
| TIMM8A    | METTL1 | 0.014103872 | 0.539424933  |
| ZC4H2     | METTL1 | 3.15E-05    | 0.792121008  |
| COX7C     | METTL1 | 1.74E-05    | 0.806593685  |
| ABHD8     | METTL1 | 3.52E-04    | -0.719150101 |
| RAB3IP    | METTL1 | 7.27E-04    | 0.691824503  |
| YEATS4    | METTL1 | 9.66E-06    | 0.819886219  |
| LRRC61    | METTL1 | 0.00688017  | 0.583815123  |
| HP1BP3    | METTL1 | 0.026594427 | 0.494692197  |
| F2RL3     | METTL1 | 0.0337393   | -0.476326776 |
| GFER      | METTL1 | 9.00E-04    | -0.683167359 |
| WDR24     | METTL1 | 0.043527468 | -0.45557348  |
| GNG13     | METTL1 | 0.002063411 | 0.646625897  |
| TUBBP1    | METTL1 | 0.004423062 | 0.608383997  |
| METTL25   | METTL1 | 0.001828917 | 0.652244238  |
| EMC6      | METTL1 | 0.005611335 | 0.595390338  |
| METTL16   | METTL1 | 3.15E-04    | 0.723180781  |
| VIL1      | METTL1 | 0.025067136 | -0.499113845 |
| PNKD      | METTL1 | 0.008819485 | -0.56912627  |
| TNFRSF19  | METTL1 | 0.008402358 | 0.572045004  |
| RNF6      | METTL1 | 0.004834713 | 0.603587987  |
| HIP1      | METTL1 | 0.013871694 | -0.540521163 |
| PTPN12    | METTL1 | 0.005111994 | -0.60054422  |
| POR       | METTL1 | 0.014506495 | -0.53755793  |
| FGL2      | METTL1 | 0.033375287 | -0.477184726 |
| PEX1      | METTL1 | 0.009309485 | 0.565837989  |
| RBM48     | METTL1 | 0.006460079 | 0.587437682  |

|           |        |             |              |
|-----------|--------|-------------|--------------|
| CASD1     | METTL1 | 0.01103576  | 0.55527363   |
| LRFN1     | METTL1 | 0.016742949 | -0.527885634 |
| ZFP36     | METTL1 | 0.002355985 | -0.640321002 |
| SRD5A3    | METTL1 | 0.038905937 | -0.464864561 |
| SPINK2    | METTL1 | 0.002562293 | 0.636257664  |
| PAICS     | METTL1 | 0.029568142 | 0.486627735  |
| PPAT      | METTL1 | 0.001421257 | 0.663640419  |
| ASPHD2    | METTL1 | 0.020138282 | -0.515015607 |
| VPREB3    | METTL1 | 5.66E-04    | 0.701619794  |
| C22orf24  | METTL1 | 1.22E-04    | 0.754359744  |
| POM121L9P | METTL1 | 0.042418389 | 0.457730928  |
| A4GALT    | METTL1 | 0.021364763 | -0.510792064 |
| TPST2     | METTL1 | 0.008959458 | -0.568172063 |
| MPST      | METTL1 | 0.003896626 | -0.615087061 |
| TST       | METTL1 | 0.004620277 | -0.606042292 |
| LIF       | METTL1 | 0.002532834 | 0.636820779  |
| EMC4      | METTL1 | 0.001003839 | 0.678620524  |
| SPECC1    | METTL1 | 0.015308763 | -0.533958684 |
| CPA4      | METTL1 | 0.001707128 | 0.655404512  |
| ATP6V1F   | METTL1 | 0.028333212 | -0.489895593 |
| NAA38     | METTL1 | 0.001043968 | 0.676972593  |
| CDHR3     | METTL1 | 0.022958363 | 0.505583094  |
| PRKRIP1   | METTL1 | 1.17E-05    | 0.815708096  |
| DNAJB9    | METTL1 | 6.85E-05    | 0.771269589  |
| IRF5      | METTL1 | 0.00763325  | -0.577751827 |
| NDUFA5    | METTL1 | 0.007934182 | 0.575465284  |
| MYO1B     | METTL1 | 0.028606639 | 0.489162544  |
| MTX2      | METTL1 | 6.75E-04    | 0.694767799  |
| CHN1      | METTL1 | 0.003414044 | 0.621926899  |
| EIF2S2P4  | METTL1 | 0.032478115 | 0.479330946  |
| ORMDL1    | METTL1 | 0.003261925 | 0.624249421  |
| HAT1      | METTL1 | 0.007918948 | 0.575579311  |
| HERC2     | METTL1 | 0.043078086 | 0.456442476  |
| WDFY4     | METTL1 | 0.043040538 | 0.4565154    |
| EIF2AK4   | METTL1 | 0.008079757 | -0.574384514 |
| CGNL1     | METTL1 | 0.00481857  | 0.603769598  |
| ELL3      | METTL1 | 0.007495182 | 0.578825638  |
| INO80     | METTL1 | 0.005762916 | 0.593900645  |
| ALDH1A2   | METTL1 | 0.042170803 | -0.458218481 |
| ANAPC13   | METTL1 | 4.61E-04    | 0.709343605  |
| MBD4      | METTL1 | 0.002831287 | 0.631350944  |
| PSMA1     | METTL1 | 0.001790492 | 0.653221776  |
| PALLD     | METTL1 | 0.028569443 | -0.48926194  |
| SERGEF    | METTL1 | 9.63E-04    | 0.680356016  |
| RPAIN     | METTL1 | 0.001296673 | 0.667673202  |
| PLD2      | METTL1 | 0.017622442 | -0.524364899 |
| KIF1C     | METTL1 | 0.026037374 | -0.496281124 |
| CCNT1     | METTL1 | 0.027768093 | 0.491428471  |
| ILF3      | METTL1 | 0.018611043 | 0.52057136   |
| AP1M2     | METTL1 | 0.038109986 | -0.46655004  |
| SIGLEC9   | METTL1 | 0.005027623 | -0.601455657 |
| KLK10     | METTL1 | 9.23E-04    | 0.682098544  |
| NGDN      | METTL1 | 3.42E-04    | 0.72020822   |
| ADCY4     | METTL1 | 0.010299775 | -0.559600719 |

|          |        |             |              |
|----------|--------|-------------|--------------|
| BCL2L2   | METTL1 | 0.006112174 | -0.590587152 |
| PARP2    | METTL1 | 0.049293353 | 0.444993592  |
| EAPP     | METTL1 | 1.23E-05    | 0.814515106  |
| NEDD8    | METTL1 | 0.007734    | 0.576978227  |
| QRICH2   | METTL1 | 0.036155667 | 0.470807557  |
| SEC14L1  | METTL1 | 0.003979336 | -0.613986126 |
| CDH15    | METTL1 | 0.035271048 | 0.472793787  |
| KLF16    | METTL1 | 0.013591062 | -0.541866068 |
| ABHD17A  | METTL1 | 0.004581691 | -0.606493876 |
| TNNI3    | METTL1 | 0.029279823 | 0.487380948  |
| CBFA2T3  | METTL1 | 0.041498915 | -0.459552817 |
| PHF10    | METTL1 | 0.001001903 | 0.678701417  |
| PRRG3    | METTL1 | 0.035196938 | 0.472961942  |
| STARD8   | METTL1 | 0.033953452 | -0.475825405 |
| SH3BP4   | METTL1 | 0.039434799 | -0.46375939  |
| EXOC3L2  | METTL1 | 0.022984199 | -0.505501038 |
| RPL36    | METTL1 | 4.56E-04    | 0.709754379  |
| ATP8B3   | METTL1 | 2.79E-04    | -0.727356124 |
| SLC27A1  | METTL1 | 0.03291644  | -0.478276671 |
| USHBP1   | METTL1 | 0.012406639 | 0.547801805  |
| COLGALT1 | METTL1 | 0.001241113 | -0.669577654 |
| PGLS     | METTL1 | 2.38E-04    | -0.732717376 |
| SNX9     | METTL1 | 0.026913671 | 0.493793387  |
| RTN4IP1  | METTL1 | 1.09E-04    | 0.757628133  |
| QRSL1    | METTL1 | 1.11E-04    | 0.757223887  |
| C6orf203 | METTL1 | 3.97E-04    | 0.714854188  |
| RSPH3    | METTL1 | 0.00413728  | -0.61193539  |
| MLLT1    | METTL1 | 0.038086939 | -0.466599249 |
| ACTN4    | METTL1 | 0.025348298 | -0.498284177 |
| STK33    | METTL1 | 7.48E-04    | 0.690655543  |
| EPO      | METTL1 | 0.001632969 | 0.657422708  |
| MAP1S    | METTL1 | 0.022977693 | -0.505521695 |
| SSBP4    | METTL1 | 0.009871503 | -0.56223554  |
| KIAA1683 | METTL1 | 0.015156493 | 0.534629967  |
| HRC      | METTL1 | 0.001284573 | 0.668082014  |
| UBAC1    | METTL1 | 0.001098304 | -0.674824359 |
| SAG      | METTL1 | 0.002877792 | 0.630542378  |
| LSP1     | METTL1 | 0.027985342 | -0.490836306 |
| ATXN10   | METTL1 | 0.019948731 | 0.515686501  |
| TUBGCP2  | METTL1 | 2.73E-04    | -0.728150924 |
| CYP2E1   | METTL1 | 0.004307736 | 0.609793637  |
| HBZ      | METTL1 | 0.001881902 | 0.650924144  |
| EXOSC2   | METTL1 | 0.014887384 | 0.5358297    |
| YIPF2    | METTL1 | 0.033878817 | -0.475999857 |
| ATG4D    | METTL1 | 0.016593377 | -0.528499054 |
| TMEM160  | METTL1 | 0.010434435 | -0.558790658 |
| GMFG     | METTL1 | 0.016864119 | 0.527391905  |
| SESN2    | METTL1 | 0.004674171 | -0.605416755 |
| ATPIF1   | METTL1 | 0.005671908 | 0.594791118  |
| THEMIS2  | METTL1 | 0.01113522  | -0.554706968 |
| CCDC62   | METTL1 | 0.004734133 | 0.604727739  |
| HIP1R    | METTL1 | 0.019058422 | 0.518907354  |
| ZNF317   | METTL1 | 0.023920151 | 0.502576618  |
| EIF3G    | METTL1 | 0.036712596 | 0.46957641   |

|           |        |             |              |
|-----------|--------|-------------|--------------|
| ZNF426    | METTL1 | 8.12E-04    | 0.687372937  |
| DKC1      | METTL1 | 4.36E-05    | 0.783631781  |
| MPP1      | METTL1 | 0.00199306  | -0.648252801 |
| ZNF331    | METTL1 | 3.10E-05    | 0.792495927  |
| LRP3      | METTL1 | 5.33E-04    | -0.703923855 |
| C12orf65  | METTL1 | 5.84E-06    | 0.830430407  |
| NOL11     | METTL1 | 1.94E-05    | 0.804080661  |
| PKDREJ    | METTL1 | 0.0300668   | -0.485338528 |
| SLC35D2   | METTL1 | 0.003913943 | -0.614854962 |
| PRRG1     | METTL1 | 0.021612742 | -0.509961662 |
| POLN      | METTL1 | 0.026095696 | 0.496113517  |
| ULBP2     | METTL1 | 3.86E-05    | 0.786857083  |
| LILRB2    | METTL1 | 0.015337312 | -0.533833424 |
| AAR2      | METTL1 | 0.016998715 | 0.526846793  |
| TTLL9     | METTL1 | 0.025429972 | 0.498044532  |
| RBM39     | METTL1 | 0.020527852 | 0.513652404  |
| ZNF227    | METTL1 | 0.007098239 | 0.582005648  |
| COX4I1    | METTL1 | 3.22E-04    | 0.722388103  |
| COX7B     | METTL1 | 0.017133798 | 0.526303167  |
| F12       | METTL1 | 0.013969974 | -0.540055343 |
| RLIM      | METTL1 | 0.042218006 | 0.458125358  |
| TRAF3     | METTL1 | 0.044432802 | 0.453843581  |
| HAUS8     | METTL1 | 0.01509906  | 0.534884566  |
| SH3BP5    | METTL1 | 0.043373806 | 0.455869844  |
| HACL1     | METTL1 | 0.010984452 | 0.555567568  |
| CAPN7     | METTL1 | 0.033609291 | 0.476632363  |
| SLC6A6    | METTL1 | 9.35E-04    | -0.681562705 |
| KCNC3     | METTL1 | 0.038765005 | -0.465161032 |
| MGAT1     | METTL1 | 0.001502828 | -0.661158146 |
| RPL27     | METTL1 | 0.001331363 | 0.666518636  |
| VPS25     | METTL1 | 0.004963983 | -0.602151532 |
| NDUFA2    | METTL1 | 1.50E-04    | 0.747787234  |
| ACAP3     | METTL1 | 0.014937101 | -0.535606746 |
| PPFIA1    | METTL1 | 0.03093052  | -0.483144652 |
| TRAF7     | METTL1 | 0.045385686 | -0.452051908 |
| NINJ1     | METTL1 | 0.031114992 | -0.482682322 |
| ZCCHC9    | METTL1 | 0.007251306 | 0.580762555  |
| RARA      | METTL1 | 0.006485237 | -0.587215383 |
| CHD1L     | METTL1 | 0.047346788 | 0.448453697  |
| RBM8A     | METTL1 | 0.002579515 | 0.635930957  |
| CLUHP3    | METTL1 | 0.003822797 | 0.616086238  |
| ZNF304    | METTL1 | 0.004330832 | 0.609508854  |
| USP29     | METTL1 | 1.97E-04    | 0.739023868  |
| SNRPA1    | METTL1 | 0.006527988 | 0.586839239  |
| LIN28A    | METTL1 | 0.013420859 | 0.542692695  |
| DNAJB1    | METTL1 | 0.017881119 | 0.523356175  |
| RFX1      | METTL1 | 0.007254764 | -0.580734723 |
| C19orf57  | METTL1 | 0.024586445 | -0.500549487 |
| SPATA6    | METTL1 | 0.007653702 | -0.577594116 |
| SLC6A11   | METTL1 | 0.004520288 | 0.607219004  |
| FCRLA     | METTL1 | 5.62E-04    | 0.701895035  |
| LINC00470 | METTL1 | 0.004648996 | 0.605708216  |
| EMILIN2   | METTL1 | 0.002391336 | -0.639604204 |
| ARFIP2    | METTL1 | 0.010128332 | 0.560644591  |



|          |        |             |              |
|----------|--------|-------------|--------------|
| TIMM10B  | METTL1 | 0.005002929 | 0.601724811  |
| HHLA1    | METTL1 | 0.008411898 | 0.571976942  |
| PTCD3    | METTL1 | 0.00167667  | 0.656224353  |
| MRPL35   | METTL1 | 0.01308286  | 0.544359651  |
| RAN      | METTL1 | 1.97E-04    | 0.739107395  |
| RAP1GAP2 | METTL1 | 0.011189011 | -0.554402209 |
| TMEM128  | METTL1 | 0.015560839 | 0.532859105  |
| COQ3     | METTL1 | 0.022228307 | 0.50793257   |
| PNISR    | METTL1 | 0.023590066 | 0.503597465  |
| SEC61G   | METTL1 | 0.002823478 | 0.631487807  |
| UTP3     | METTL1 | 0.033686338 | 0.476451153  |
| ITGB4    | METTL1 | 0.020626331 | -0.513311067 |
| H3F3B    | METTL1 | 0.007912577 | 0.575627059  |
| EIF5A    | METTL1 | 3.09E-04    | 0.72376882   |
| GUCY2D   | METTL1 | 0.010717373 | -0.55711588  |
| GPS2     | METTL1 | 4.93E-06    | 0.833847894  |
| DLG4     | METTL1 | 0.002407617 | -0.639277041 |
| NIP7     | METTL1 | 0.001093248 | 0.675020393  |
| POLR3F   | METTL1 | 0.012157696 | 0.549107221  |
| RIN2     | METTL1 | 0.032496454 | -0.479286614 |
| DAP3     | METTL1 | 0.001484232 | 0.661713904  |
| RHBG     | METTL1 | 0.048064898 | 0.44716474   |
| ARHGEF11 | METTL1 | 0.015650195 | -0.532472761 |
| RAB25    | METTL1 | 7.13E-04    | 0.692601412  |
| FCRL2    | METTL1 | 0.019451623 | 0.517470402  |
| DPH2     | METTL1 | 0.022604107 | 0.506715644  |
| TOE1     | METTL1 | 0.010847145 | 0.55635971   |
| NASP     | METTL1 | 0.002041008 | 0.647138868  |
| CTNBL1   | METTL1 | 0.03545479  | 0.472378067  |
| LPIN3    | METTL1 | 0.015534683 | 0.532972534  |
| OSER1    | METTL1 | 2.16E-04    | 0.736012105  |
| BHMT2    | METTL1 | 0.026752555 | 0.494245942  |
| AP3B1    | METTL1 | 4.68E-04    | 0.708821648  |
| SYT4     | METTL1 | 0.013218743 | 0.543685368  |
| SLC14A2  | METTL1 | 0.002131557 | 0.645093607  |
| ZMYM5    | METTL1 | 0.002890015 | 0.630331654  |
| USPL1    | METTL1 | 9.95E-05    | 0.760454385  |
| XPO4     | METTL1 | 0.009270584 | 0.566093824  |
| POMP     | METTL1 | 0.009067828 | 0.567441602  |
| HMGB1P5  | METTL1 | 0.012435119 | 0.547653813  |
| GPR12    | METTL1 | 0.010401896 | 0.558985617  |
| PIK3C2B  | METTL1 | 0.007118305 | 0.581841447  |
| SLC41A1  | METTL1 | 0.003684545 | 0.618001125  |
| LGR6     | METTL1 | 0.020480035 | -0.513818614 |
| TPT1     | METTL1 | 0.008524191 | 0.571180518  |
| KL       | METTL1 | 0.042003831 | -0.458548536 |
| MORC4    | METTL1 | 0.010003319 | 0.561414846  |
| BEX2     | METTL1 | 1.55E-04    | 0.74673909   |
| TCEAL4   | METTL1 | 0.00180246  | 0.652915449  |
| PRAM1    | METTL1 | 8.65E-04    | -0.684770291 |
| PDE6B    | METTL1 | 0.02304037  | 0.505322893  |
| CSNK1G2  | METTL1 | 0.044313607 | -0.454069776 |
| WDR74    | METTL1 | 0.035338599 | 0.472640756  |
| LGALS12  | METTL1 | 4.78E-04    | -0.707966584 |

|          |        |             |              |
|----------|--------|-------------|--------------|
| RTN3     | METTL1 | 6.19E-04    | -0.698133444 |
| RARRES3  | METTL1 | 0.009580894 | 0.564076842  |
| FOPNL    | METTL1 | 0.001528239 | 0.660407989  |
| MED10    | METTL1 | 0.019624427 | 0.516846206  |
| MORC2    | METTL1 | 0.015775185 | 0.531935305  |
| GGT2     | METTL1 | 0.001160222 | 0.672482906  |
| AGAP3    | METTL1 | 0.002282042 | -0.641849841 |
| BTG1     | METTL1 | 4.28E-05    | 0.784167551  |
| C12orf29 | METTL1 | 4.90E-04    | 0.707076053  |
| TMTC1    | METTL1 | 0.013565614 | -0.541989131 |
| LARS     | METTL1 | 1.36E-04    | 0.751005923  |
| IMPA1    | METTL1 | 0.001968835 | 0.648824142  |
| E2F5     | METTL1 | 6.88E-04    | 0.693984718  |
| CCDC59   | METTL1 | 0.001621477 | 0.657742283  |
| SWAP70   | METTL1 | 2.42E-04    | 0.732168943  |
| LYVE1    | METTL1 | 0.043327594 | -0.455959131 |
| MICALCL  | METTL1 | 0.003804603 | -0.616334936 |
| SBF2     | METTL1 | 0.029970755 | -0.485585526 |
| MICAL2   | METTL1 | 0.0046931   | -0.605198462 |
| RRAS2    | METTL1 | 0.009947141 | 0.561763534  |
| COX16    | METTL1 | 7.36E-04    | 0.691341341  |
| TTC9     | METTL1 | 0.022552062 | 0.506883217  |
| MED6     | METTL1 | 3.35E-05    | 0.790555423  |
| LOXL2    | METTL1 | 0.041792946 | 0.458966848  |
| CTIF     | METTL1 | 0.002965648 | -0.629044079 |
| MRPS36   | METTL1 | 9.05E-04    | 0.682919486  |
| CDK7     | METTL1 | 5.06E-05    | 0.779634049  |
| THUMPD3  | METTL1 | 0.001401944 | 0.664245605  |
| GSTM1    | METTL1 | 6.20E-05    | 0.774075017  |
| PRPF38B  | METTL1 | 6.73E-04    | 0.694898125  |
| GSTM3    | METTL1 | 0.049503969 | 0.444625529  |
| PSRC1    | METTL1 | 0.018508366 | -0.520957763 |
| SORT1    | METTL1 | 0.004050085 | -0.61305935  |
| LAMTOR5  | METTL1 | 0.002435433 | 0.638722349  |
| AP4B1    | METTL1 | 0.037343224 | 0.468199754  |
| PPHLN1   | METTL1 | 2.57E-04    | 0.730225169  |
| ARF3     | METTL1 | 0.008107072 | -0.5741835   |
| TMEM106C | METTL1 | 0.007235396 | 0.580890761  |
| SLC38A2  | METTL1 | 0.031897605 | 0.480744466  |
| CDC73    | METTL1 | 0.030801223 | 0.483469988  |
| TIMM17A  | METTL1 | 0.007007694 | 0.582751361  |
| ERN2     | METTL1 | 7.09E-05    | 0.770288849  |
| RPS15A   | METTL1 | 8.36E-04    | 0.686181625  |
| FBXO18   | METTL1 | 0.013665282 | 0.541508213  |
| RBM17    | METTL1 | 0.027043439 | 0.493430434  |
| IL2RA    | METTL1 | 0.001971057 | 0.648771502  |
| MYBPC3   | METTL1 | 0.0130354   | -0.544596487 |
| PUM1     | METTL1 | 0.005743671 | 0.594087979  |
| AGO4     | METTL1 | 0.004445726 | -0.608110549 |
| HOOK1    | METTL1 | 3.99E-04    | 0.714657864  |
| CYP2J2   | METTL1 | 6.15E-06    | 0.829396037  |
| ZCCHC11  | METTL1 | 0.004504071 | 0.607411873  |
| PRPF38A  | METTL1 | 9.22E-05    | 0.762697874  |
| DSC2     | METTL1 | 0.009521432 | -0.564459183 |

|          |        |             |              |
|----------|--------|-------------|--------------|
| RNF138   | METTL1 | 6.86E-04    | 0.694136329  |
| DAGLA    | METTL1 | 0.008450742 | -0.571700471 |
| TIMM10   | METTL1 | 0.01320699  | 0.54374347   |
| APLNR    | METTL1 | 0.009305613 | 0.565863412  |
| C5AR2    | METTL1 | 0.01147973  | -0.552775349 |
| UBAC2    | METTL1 | 0.005716757 | 0.59435084   |
| ARGLU1   | METTL1 | 0.040298955 | 0.461978017  |
| ERCC5    | METTL1 | 0.005836785 | 0.593186335  |
| ETS1     | METTL1 | 1.81E-04    | 0.741771892  |
| SLC37A2  | METTL1 | 0.020452074 | -0.513915946 |
| WDR36    | METTL1 | 0.02987302  | 0.485837511  |
| UBQLN1   | METTL1 | 0.005101695 | 0.60065481   |
| NAA35    | METTL1 | 0.005209955 | 0.5995014    |
| ANXA1    | METTL1 | 0.027220958 | -0.492936139 |
| AGTPBP1  | METTL1 | 0.004666004 | -0.605511159 |
| GOLM1    | METTL1 | 0.023615409 | -0.50351869  |
| ISCA1    | METTL1 | 0.014016244 | 0.53983695   |
| ADAM19   | METTL1 | 0.028843539 | 0.488531862  |
| HNF1A    | METTL1 | 0.010596359 | -0.557827748 |
| FBXO21   | METTL1 | 0.007113648 | 0.581879519  |
| HRK      | METTL1 | 0.010758452 | 0.556875718  |
| DTX1     | METTL1 | 0.02897883  | 0.488173511  |
| TMEM243  | METTL1 | 0.002690206 | 0.63387346   |
| CCDC146  | METTL1 | 0.00211059  | 0.645560645  |
| PNPLA8   | METTL1 | 3.02E-04    | 0.72462342   |
| MDFIC    | METTL1 | 0.012313153 | 0.548289531  |
| MTO1     | METTL1 | 0.008367819 | 0.572291943  |
| SYNCRIP  | METTL1 | 4.01E-04    | 0.714519036  |
| NT5E     | METTL1 | 0.005106214 | 0.600606261  |
| AKIRIN2  | METTL1 | 0.006090178 | -0.590791181 |
| ORC3     | METTL1 | 0.003937411 | 0.614541792  |
| LMO2     | METTL1 | 0.005697176 | -0.594542713 |
| NAT10    | METTL1 | 0.022831889 | 0.505985828  |
| ATP5G2   | METTL1 | 0.006244744 | 0.589370096  |
| TESPA1   | METTL1 | 4.26E-05    | 0.7842594    |
| BLOC1S1  | METTL1 | 0.016415697 | 0.529233535  |
| PPP1R1A  | METTL1 | 0.021002331 | 0.512019619  |
| HNRNPA1  | METTL1 | 1.18E-04    | 0.755273969  |
| KCNH3    | METTL1 | 0.047539421 | -0.44810647  |
| LTV1     | METTL1 | 9.48E-06    | 0.820291964  |
| MAP7     | METTL1 | 0.041820074 | -0.458912945 |
| NHSL1    | METTL1 | 0.015895232 | -0.53142231  |
| HEY2     | METTL1 | 0.045622042 | -0.451611984 |
| SMPD2    | METTL1 | 0.037209931 | 0.468489217  |
| STX11    | METTL1 | 0.001389869 | -0.664627531 |
| CCT7     | METTL1 | 8.35E-04    | 0.68623247   |
| SMYD5    | METTL1 | 0.00104833  | 0.676796683  |
| DYSF     | METTL1 | 0.019127492 | -0.518653237 |
| GNS      | METTL1 | 0.004823393 | -0.603715283 |
| KIAA0513 | METTL1 | 0.001054761 | -0.676538499 |
| FHOD1    | METTL1 | 0.001220087 | -0.670317125 |
| ZNF670   | METTL1 | 0.019948154 | 0.515688551  |
| URB2     | METTL1 | 0.002060221 | 0.646698642  |
| COG2     | METTL1 | 0.016946214 | 0.527059008  |

|           |        |             |              |
|-----------|--------|-------------|--------------|
| DHX9      | METTL1 | 9.45E-07    | 0.863453245  |
| NPL       | METTL1 | 0.019339175 | -0.517878961 |
| PIGC      | METTL1 | 4.17E-04    | 0.713060923  |
| ACBD6     | METTL1 | 0.005801679 | 0.593524874  |
| MRPL44    | METTL1 | 0.008248245 | 0.573153313  |
| DOCK10    | METTL1 | 0.024791775 | 0.499933554  |
| TTLL4     | METTL1 | 0.026675648 | -0.49446272  |
| DNAJB2    | METTL1 | 4.99E-05    | 0.780044466  |
| REV1      | METTL1 | 0.010206782 | 0.56016516   |
| TMEM127   | METTL1 | 4.73E-05    | -0.781486415 |
| GCC2      | METTL1 | 2.79E-05    | 0.795142553  |
| MRPS9     | METTL1 | 0.009796453 | 0.562706791  |
| GPR45     | METTL1 | 0.002487846 | 0.637691359  |
| EPC2      | METTL1 | 9.94E-04    | 0.679043062  |
| ISCU      | METTL1 | 0.011877369 | 0.550603344  |
| CKAP4     | METTL1 | 0.007005966 | -0.582765668 |
| PLXNC1    | METTL1 | 0.00569636  | -0.59455072  |
| PWP1      | METTL1 | 1.60E-05    | 0.808517365  |
| FLNB      | METTL1 | 0.018918139 | 0.519425744  |
| RNASEH2B  | METTL1 | 9.66E-04    | 0.680206575  |
| CKAP2     | METTL1 | 0.036178792 | 0.470756144  |
| THSD1     | METTL1 | 0.039149445 | 0.464354261  |
| LRCH1     | METTL1 | 0.003639025 | 0.618644653  |
| MED4      | METTL1 | 0.011465924 | 0.552851848  |
| PHF11     | METTL1 | 0.037985864 | 0.466815334  |
| RPL13AP25 | METTL1 | 7.21E-04    | 0.692165797  |
| NUDT15    | METTL1 | 0.007408001 | 0.579512047  |
| SETDB2    | METTL1 | 0.036084965 | 0.470964904  |
| TNS3      | METTL1 | 0.033906542 | -0.475935017 |
| RAPGEF5   | METTL1 | 1.91E-04    | 0.740105945  |
| RAC1      | METTL1 | 4.93E-04    | -0.706828344 |
| IL6       | METTL1 | 0.005511696 | 0.596387698  |
| ZDHHC4    | METTL1 | 0.03236268  | 0.479610441  |
| AOAH      | METTL1 | 0.008144576 | -0.573908398 |
| BZW2      | METTL1 | 1.66E-06    | 0.854010268  |
| TBRG4     | METTL1 | 0.025106315 | 0.498997795  |
| MYO1G     | METTL1 | 0.020954103 | -0.512184235 |
| TTYH3     | METTL1 | 5.31E-04    | -0.704017544 |
| TM6SF1    | METTL1 | 0.008130889 | -0.574008673 |
| RSAD1     | METTL1 | 0.02021764  | 0.514736223  |
| TACO1     | METTL1 | 0.008487036 | 0.571443083  |
| MRPL47    | METTL1 | 2.59E-04    | 0.729872289  |
| TRA2B     | METTL1 | 7.40E-04    | 0.691107705  |
| ERMN      | METTL1 | 0.039130765 | 0.464393319  |
| TANK      | METTL1 | 0.010414869 | 0.558907833  |
| BLK       | METTL1 | 0.023066414 | 0.505240413  |
| EPRS      | METTL1 | 0.026995317 | 0.493564867  |
| HLX       | METTL1 | 0.014645612 | -0.53692252  |
| KCTD3     | METTL1 | 0.016260204 | -0.529881547 |
| WDR33     | METTL1 | 0.001766977 | 0.653828701  |
| HS6ST1    | METTL1 | 0.02798284  | -0.490843105 |
| GYPC      | METTL1 | 0.037700213 | 0.46742844   |
| STAM      | METTL1 | 4.57E-04    | 0.709672678  |
| YME1L1    | METTL1 | 0.018925635 | 0.519397967  |

|           |        |             |              |
|-----------|--------|-------------|--------------|
| NIPSNAP3A | METTL1 | 0.020144285 | -0.514994442 |
| CDK9      | METTL1 | 0.047486432 | -0.448201876 |
| C9orf78   | METTL1 | 0.006051393 | 0.591152415  |
| KLF4      | METTL1 | 0.001888964 | -0.650750538 |
| FAM129B   | METTL1 | 0.011594892 | -0.552140118 |
| SLC2A8    | METTL1 | 0.002879341 | -0.630515635 |
| CDK5RAP2  | METTL1 | 0.04697244  | 0.449131584  |
| SLC31A2   | METTL1 | 0.022171365 | -0.50811838  |
| SLC31A1   | METTL1 | 0.017656609 | -0.524230988 |
| TLR4      | METTL1 | 0.024588884 | -0.500542147 |
| STX17     | METTL1 | 0.011046924 | 0.55520982   |
| PRPF4     | METTL1 | 0.019881858 | 0.515924399  |
| ATP6V1G1  | METTL1 | 2.56E-04    | 0.730306924  |
| MRPL50    | METTL1 | 9.51E-06    | 0.82021201   |
| NR5A1     | METTL1 | 0.006786175 | -0.58460959  |
| XPA       | METTL1 | 0.003540221 | 0.620064761  |
| ANP32B    | METTL1 | 0.031937958 | 0.48064556   |
| PDCL      | METTL1 | 0.004129832 | 0.612030631  |
| RPL35     | METTL1 | 2.44E-05    | 0.798440276  |
| CTSV      | METTL1 | 0.008811604 | 0.569180365  |
| DERL1     | METTL1 | 0.00744369  | 0.579230262  |
| MYC       | METTL1 | 0.006203234 | 0.589748874  |
| RANBP6    | METTL1 | 9.39E-04    | 0.68140164   |
| POLR1E    | METTL1 | 0.007600292 | 0.578006703  |
| IL11RA    | METTL1 | 0.01303127  | 0.54461713   |
| TLN1      | METTL1 | 0.045061464 | -0.452658252 |
| CD72      | METTL1 | 0.007151137 | 0.581573595  |
| HINT2     | METTL1 | 0.00961974  | 0.563828108  |
| RPS6      | METTL1 | 9.66E-04    | 0.680222013  |
| CNPY3     | METTL1 | 0.015518115 | -0.533044462 |
| KIF13A    | METTL1 | 0.002351255 | -0.64041759  |
| CMTR1     | METTL1 | 0.020892584 | 0.512394655  |
| TMEM14B   | METTL1 | 0.002145415 | 0.644787036  |
| FRS3      | METTL1 | 0.037825693 | -0.467158673 |
| UQCC2     | METTL1 | 0.004621115 | 0.606032527  |
| IER3      | METTL1 | 0.011037368 | -0.555264438 |
| NRM       | METTL1 | 0.02666982  | -0.494479168 |
| FGFBP2    | METTL1 | 0.048196808 | -0.446929581 |
| FCHSD2    | METTL1 | 2.19E-04    | 0.735519398  |
| ARRB1     | METTL1 | 0.007902904 | -0.575699605 |
| NUMA1     | METTL1 | 0.016910447 | 0.527203887  |
| CCDC90B   | METTL1 | 0.017242395 | 0.525868616  |
| RAB30     | METTL1 | 8.19E-05    | 0.766151548  |
| LRRC32    | METTL1 | 2.26E-05    | 0.800309103  |
| NARS2     | METTL1 | 0.003866474 | 0.615493214  |
| SLCO5A1   | METTL1 | 0.006538252 | 0.58674923   |
| TGS1      | METTL1 | 2.71E-05    | 0.795846804  |
| NEK1      | METTL1 | 0.00139585  | 0.664438022  |
| TMPRSS4   | METTL1 | 0.019105936 | 0.518732468  |
| C11orf70  | METTL1 | 0.004092659 | 0.612508085  |
| PPP2R1B   | METTL1 | 0.003172497 | 0.625657111  |
| C11orf1   | METTL1 | 7.01E-04    | 0.693244595  |
| ALKBH8    | METTL1 | 3.94E-05    | 0.786300833  |
| CTDSPL2   | METTL1 | 0.023223277 | 0.504745185  |

|           |        |             |              |
|-----------|--------|-------------|--------------|
| SLTM      | METTL1 | 0.004017479 | 0.613484792  |
| HAUS2     | METTL1 | 2.60E-04    | 0.729786679  |
| PARP6     | METTL1 | 0.002166918 | 0.644314582  |
| RPLP1     | METTL1 | 3.62E-04    | 0.718227709  |
| SMAD6     | METTL1 | 0.001276203 | -0.668366726 |
| PLCB2     | METTL1 | 2.66E-04    | -0.72895324  |
| STRA6     | METTL1 | 0.046276346 | 0.450403217  |
| RSL24D1   | METTL1 | 6.99E-05    | 0.770718027  |
| SPTBN5    | METTL1 | 0.018390566 | -0.52140319  |
| GTF2B     | METTL1 | 5.59E-04    | 0.702109125  |
| RABGGTB   | METTL1 | 7.23E-04    | 0.692021739  |
| CGREF1    | METTL1 | 0.017382983 | 0.525309295  |
| PNPT1     | METTL1 | 0.006957526 | 0.583167942  |
| DYNC2L1   | METTL1 | 0.027681988 | 0.491664178  |
| THUMPD2   | METTL1 | 0.009957044 | 0.561701951  |
| SLC5A6    | METTL1 | 3.80E-04    | 0.716418683  |
| FBXO11    | METTL1 | 0.008934003 | 0.568344686  |
| ATRAID    | METTL1 | 0.020466794 | 0.513864692  |
| DUSP5     | METTL1 | 1.53E-04    | 0.747239801  |
| CALHM2    | METTL1 | 0.029150191 | -0.487721502 |
| KIF20B    | METTL1 | 0.001383236 | 0.664838548  |
| ANXA7     | METTL1 | 0.02956227  | 0.486643017  |
| FAM149B1  | METTL1 | 0.011746573 | 0.5513112    |
| NCOA4     | METTL1 | 0.001408821 | -0.664029303 |
| MSMB      | METTL1 | 0.004423062 | 0.608383997  |
| RPS24     | METTL1 | 2.25E-04    | 0.734602251  |
| AOX1      | METTL1 | 0.044529898 | -0.45365967  |
| ATIC      | METTL1 | 3.67E-04    | 0.717670116  |
| ASNSD1    | METTL1 | 0.041902994 | 0.458748353  |
| METTL5    | METTL1 | 6.75E-05    | 0.771686377  |
| SSB       | METTL1 | 0.013590464 | 0.541868958  |
| PPIG      | METTL1 | 2.36E-04    | 0.733104092  |
| OLA1      | METTL1 | 0.002449475 | 0.63844435   |
| CIR1      | METTL1 | 0.00293404  | 0.629578804  |
| SSFA2     | METTL1 | 0.010506706 | -0.558359399 |
| WDR12     | METTL1 | 0.00467023  | 0.605462288  |
| ABI2      | METTL1 | 0.035033049 | 0.473334781  |
| ITGAV     | METTL1 | 0.021232469 | -0.511238212 |
| SLC35A5   | METTL1 | 0.031358108 | -0.482076288 |
| DIRC2     | METTL1 | 0.006129542 | -0.59042648  |
| SENP7     | METTL1 | 0.023632207 | 0.50346651   |
| COX17     | METTL1 | 2.57E-04    | 0.730231556  |
| SECISBP2L | METTL1 | 5.61E-05    | 0.776861473  |
| PARP16    | METTL1 | 0.039910629 | 0.462774814  |
| COPS4     | METTL1 | 0.003065263 | 0.627389247  |
| HNRNPD    | METTL1 | 0.010375819 | 0.559142222  |
| FGF5      | METTL1 | 0.003686808 | 0.617969312  |
| PDE5A     | METTL1 | 0.032002238 | -0.480488211 |
| NUP54     | METTL1 | 0.00180731  | 0.652791777  |
| G3BP2     | METTL1 | 6.16E-06    | 0.829371945  |
| CDKL2     | METTL1 | 0.028479232 | 0.489503428  |
| GSTCD     | METTL1 | 0.010668044 | 0.557405271  |
| INTS12    | METTL1 | 3.92E-05    | 0.786441173  |
| CASP6     | METTL1 | 0.001456196 | 0.662562913  |

|           |        |             |              |
|-----------|--------|-------------|--------------|
| LEF1      | METTL1 | 0.025310083 | 0.498396515  |
| EGF       | METTL1 | 0.043153923 | -0.456295336 |
| SLC39A8   | METTL1 | 0.001717577 | 0.655126099  |
| FBN2      | METTL1 | 0.034870461 | -0.473706009 |
| RGS3      | METTL1 | 0.041407125 | -0.459736402 |
| ETV6      | METTL1 | 0.001918872 | -0.650021354 |
| CPNE8     | METTL1 | 0.036736114 | -0.469524742 |
| YARS2     | METTL1 | 0.028663362 | 0.48901116   |
| FGD4      | METTL1 | 0.022728556 | -0.506316189 |
| FAM60A    | METTL1 | 6.93E-07    | 0.868356221  |
| AEBP2     | METTL1 | 0.001337639 | 0.66631247   |
| TMEM117   | METTL1 | 3.16E-04    | 0.722968533  |
| NDUFA9    | METTL1 | 0.008738554 | 0.569683626  |
| CD27      | METTL1 | 0.014270496 | 0.538647146  |
| PEX5      | METTL1 | 0.006816667 | 0.584350883  |
| AMIGO2    | METTL1 | 0.00625361  | 0.58928946   |
| LLPH      | METTL1 | 0.013712318 | 0.541282238  |
| INHBE     | METTL1 | 0.025737462 | 0.497147722  |
| TMEM19    | METTL1 | 0.037581206 | 0.467684934  |
| LUM       | METTL1 | 0.008357129 | 0.572368534  |
| SNRPF     | METTL1 | 1.42E-04    | 0.74947649   |
| NEDD1     | METTL1 | 0.003541188 | 0.620050691  |
| TDG       | METTL1 | 0.003610327 | 0.619053798  |
| SDSL      | METTL1 | 0.04686482  | -0.449327234 |
| MMAB      | METTL1 | 0.011692712 | 0.551604549  |
| GLTP      | METTL1 | 0.002340373 | -0.640640431 |
| LNX2      | METTL1 | 0.001818644 | 0.652503887  |
| SUOX      | METTL1 | 0.024574998 | -0.500583943 |
| TARBP2    | METTL1 | 0.00155968  | 0.659494194  |
| BRCA2     | METTL1 | 0.006808827 | 0.584417306  |
| KANSL2    | METTL1 | 8.12E-04    | 0.687346002  |
| GALNT6    | METTL1 | 0.035341021 | -0.472635275 |
| WDFY2     | METTL1 | 0.04866177  | -0.446104592 |
| HNRNPA1L2 | METTL1 | 1.32E-04    | 0.751920288  |
| RHOF      | METTL1 | 0.039259173 | 0.464125117  |
| DENR      | METTL1 | 3.60E-05    | 0.788653567  |
| ABHD13    | METTL1 | 8.51E-04    | 0.68543924   |
| NOVA1     | METTL1 | 0.029196057 | 0.487600873  |
| PELI2     | METTL1 | 0.005784018 | -0.593695829 |
| RTN1      | METTL1 | 0.029375873 | -0.487129379 |
| NAA30     | METTL1 | 9.56E-05    | 0.761634059  |
| RAB15     | METTL1 | 0.012639156 | 0.546601504  |
| WDR89     | METTL1 | 5.50E-05    | 0.777387776  |
| STON2     | METTL1 | 0.01925489  | -0.518186437 |
| EFCAB11   | METTL1 | 0.039769017 | 0.463066881  |
| GPR65     | METTL1 | 0.002937875 | 0.629513682  |
| SLC24A4   | METTL1 | 0.00689221  | -0.583714006 |
| FBLN5     | METTL1 | 0.004375899 | 0.608956756  |
| WDR20     | METTL1 | 0.005177777 | 0.599842146  |
| NIPA2     | METTL1 | 0.00255371  | 0.636421169  |
| MFAP1     | METTL1 | 0.004501113 | 0.607447115  |
| TCF12     | METTL1 | 0.031559097 | 0.481578039  |
| SERF2     | METTL1 | 0.032505857 | 0.479263891  |
| GTF2A2    | METTL1 | 0.006062384 | 0.591049851  |

|          |        |             |              |
|----------|--------|-------------|--------------|
| SRP14    | METTL1 | 6.64E-04    | 0.695409432  |
| TLE3     | METTL1 | 0.034471547 | -0.474622573 |
| PSTPIP1  | METTL1 | 0.036433377 | -0.470191821 |
| BCL2A1   | METTL1 | 0.034199319 | 0.475252816  |
| HMG20A   | METTL1 | 0.045177519 | 0.452440826  |
| SCAPER   | METTL1 | 0.040268011 | 0.462041292  |
| WDR61    | METTL1 | 0.038355034 | 0.466028248  |
| NEIL1    | METTL1 | 0.040911707 | 0.460732727  |
| MAN2C1   | METTL1 | 0.027724365 | -0.491548103 |
| DNAJA4   | METTL1 | 0.033861131 | 0.476041242  |
| TPM1     | METTL1 | 0.006243993 | -0.589376933 |
| PCSK6    | METTL1 | 0.027212379 | -0.49295997  |
| ABHD2    | METTL1 | 0.029918454 | -0.48572029  |
| ZNF710   | METTL1 | 6.13E-04    | -0.698537262 |
| FURIN    | METTL1 | 0.012076102 | -0.549539792 |
| IQGAP1   | METTL1 | 0.044624919 | -0.453479986 |
| CRTC3    | METTL1 | 0.001470727 | 0.662121157  |
| PMM2     | METTL1 | 0.024610058 | 0.500478446  |
| ITGAX    | METTL1 | 0.035838831 | -0.471514553 |
| PARN     | METTL1 | 1.04E-04    | 0.759104468  |
| CDR2     | METTL1 | 2.32E-06    | 0.848149402  |
| IGSF6    | METTL1 | 0.015272975 | -0.534115971 |
| MARVELD3 | METTL1 | 0.03714638  | 0.468627511  |
| ZFH3     | METTL1 | 0.004655131 | -0.605637063 |
| CPNE2    | METTL1 | 0.012932567 | -0.54511205  |
| KIFC3    | METTL1 | 0.017653362 | -0.524243703 |
| CMTM3    | METTL1 | 0.012309159 | -0.548310431 |
| MBTSP1   | METTL1 | 0.012998028 | 0.544783476  |
| OSGIN1   | METTL1 | 0.004010699 | 0.61357362   |
| GALNS    | METTL1 | 0.033468097 | -0.476965289 |
| COPS3    | METTL1 | 0.001788568 | 0.653271176  |
| ZNF287   | METTL1 | 0.015886015 | 0.531461588  |
| KSR1     | METTL1 | 0.009510467 | -0.564529894 |
| RANBP10  | METTL1 | 0.026797037 | 0.494120782  |
| NOB1     | METTL1 | 4.49E-05    | 0.782876721  |
| PRPSAP2  | METTL1 | 6.21E-04    | 0.697996536  |
| PCTP     | METTL1 | 0.006525203 | -0.586863679 |
| SKAP1    | METTL1 | 0.002862209 | 0.630812099  |
| G6PC3    | METTL1 | 0.035288273 | -0.472754745 |
| PTRH2    | METTL1 | 6.05E-06    | 0.829719338  |
| TAF4B    | METTL1 | 4.02E-06    | 0.837878589  |
| AFG3L2   | METTL1 | 0.003053208 | 0.627587111  |
| IMPA2    | METTL1 | 7.33E-04    | -0.691493239 |
| RPRD1A   | METTL1 | 0.001003304 | 0.678642877  |
| C18orf21 | METTL1 | 0.023161971 | 0.504938414  |
| ASXL3    | METTL1 | 0.022893002 | -0.505791003 |
| ESCO1    | METTL1 | 5.97E-06    | 0.830014862  |
| ARRB2    | METTL1 | 5.31E-04    | -0.704073914 |
| SAT2     | METTL1 | 0.028323164 | -0.489922638 |
| ASGR1    | METTL1 | 0.019898852 | -0.515863883 |
| PIK3R5   | METTL1 | 0.039677047 | -0.463256993 |
| SLC16A3  | METTL1 | 0.00383869  | -0.615869815 |
| TTYH2    | METTL1 | 0.016424561 | -0.529196742 |
| EIF4A3   | METTL1 | 1.96E-04    | 0.739160689  |



|          |        |             |              |
|----------|--------|-------------|--------------|
| NARF     | METTL1 | 0.024478631 | 0.500874528  |
| CBX8     | METTL1 | 0.014431964 | -0.537900363 |
| SECTM1   | METTL1 | 0.0111377   | -0.553346373 |
| RNF157   | METTL1 | 8.71E-04    | 0.68451205   |
| CBX4     | METTL1 | 0.026950667 | -0.493689771 |
| ELAC1    | METTL1 | 0.003366504 | 0.622643331  |
| SMAD4    | METTL1 | 0.005171902 | 0.599904548  |
| PMAIP1   | METTL1 | 0.002492598 | 0.637598797  |
| IGFBP4   | METTL1 | 0.006539335 | 0.586739741  |
| NFIC     | METTL1 | 0.008314431 | -0.572675279 |
| TPGS1    | METTL1 | 0.031095108 | -0.482732054 |
| PRDM15   | METTL1 | 0.028541991 | 0.489335363  |
| FEM1A    | METTL1 | 0.036884602 | -0.469199111 |
| MVB12A   | METTL1 | 0.027518259 | -0.492113976 |
| SOD1     | METTL1 | 1.56E-05    | 0.809197482  |
| URB1     | METTL1 | 0.045896821 | 0.451102741  |
| AKT1     | METTL1 | 0.030883347 | -0.483263224 |
| SAE1     | METTL1 | 5.28E-05    | 0.778497821  |
| RNPEPL1  | METTL1 | 0.003311062 | -0.623489556 |
| MYO1F    | METTL1 | 1.11E-04    | -0.757211995 |
| NLRP12   | METTL1 | 0.018915649 | -0.519434975 |
| ZNF787   | METTL1 | 4.82E-04    | -0.707713125 |
| RPS11    | METTL1 | 4.81E-06    | 0.834351154  |
| RPL13A   | METTL1 | 6.13E-04    | 0.698549234  |
| CTU1     | METTL1 | 0.025361638 | -0.498244995 |
| NOSIP    | METTL1 | 0.019922152 | 0.51578098   |
| RCN3     | METTL1 | 0.008565051 | -0.570892843 |
| ZNF614   | METTL1 | 1.02E-06    | 0.862234141  |
| ARHGEF19 | METTL1 | 0.010227076 | 0.560041628  |
| EFHD2    | METTL1 | 4.33E-05    | -0.783808956 |
| PGD      | METTL1 | 0.010116672 | -0.560716105 |
| RPL11    | METTL1 | 2.34E-04    | 0.733284758  |
| EVA1B    | METTL1 | 9.88E-04    | -0.679268886 |
| CYR61    | METTL1 | 0.011186097 | 0.554418691  |
| PIGK     | METTL1 | 0.030476761 | 0.484291137  |
| TINAGL1  | METTL1 | 0.042056793 | -0.458443736 |
| RPS8     | METTL1 | 1.49E-04    | 0.748003638  |
| LMO4     | METTL1 | 0.013251779 | -0.543522283 |
| SYPL2    | METTL1 | 6.09E-04    | 0.698747485  |
| MTF2     | METTL1 | 0.013099847 | 0.544275051  |
| ZNF697   | METTL1 | 0.011851548 | -0.550742581 |
| PROK1    | METTL1 | 0.011799939 | 0.551021619  |
| NME7     | METTL1 | 0.001180601 | 0.671735287  |
| MPC2     | METTL1 | 9.06E-06    | 0.821273594  |
| CREG1    | METTL1 | 0.006601372 | -0.586198257 |
| DCAF6    | METTL1 | 0.030371254 | 0.484559631  |
| ILDR2    | METTL1 | 0.041673259 | -0.459204985 |
| UFC1     | METTL1 | 2.78E-04    | 0.727491537  |
| FCGR2A   | METTL1 | 0.002176641 | -0.644102254 |
| PFDN2    | METTL1 | 0.001221498 | 0.67026715   |
| FCRL5    | METTL1 | 3.95E-04    | 0.715047742  |
| MRPL24   | METTL1 | 0.016314606 | 0.529654266  |
| HDGF     | METTL1 | 0.046362153 | -0.450245673 |
| RGS16    | METTL1 | 7.96E-07    | 0.866187019  |

|          |        |             |              |
|----------|--------|-------------|--------------|
| HMCN1    | METTL1 | 0.005849673 | 0.593062469  |
| SNX27    | METTL1 | 0.007290748 | -0.58044572  |
| ADAMTSL4 | METTL1 | 0.003475216 | -0.621017102 |
| RFX5     | METTL1 | 0.00869539  | 0.569982612  |
| PI4KB    | METTL1 | 0.021997297 | 0.508688757  |
| ANP32E   | METTL1 | 0.042671416 | 0.457234925  |
| ENSA     | METTL1 | 2.00E-04    | 0.738498979  |
| MRPL9    | METTL1 | 1.57E-04    | 0.746463651  |
| IKBKE    | METTL1 | 0.04684352  | 0.449365998  |
| EIF2D    | METTL1 | 0.006316705 | 0.588718318  |
| SMYD2    | METTL1 | 0.001037518 | 0.677233802  |
| SUSD4    | METTL1 | 0.009247211 | 0.56624796   |
| DUSP10   | METTL1 | 0.004719167 | 0.604899033  |
| ATP8B2   | METTL1 | 0.032372268 | 0.479587198  |
| ADAM15   | METTL1 | 0.001245729 | -0.669416728 |
| RAB13    | METTL1 | 0.021181323 | -0.511411286 |
| SLC27A3  | METTL1 | 0.002265498 | -0.642197565 |
| HAX1     | METTL1 | 8.12E-06    | 0.823614277  |
| AQP10    | METTL1 | 0.018620951 | -0.520534164 |
| ILF2     | METTL1 | 2.82E-05    | 0.794850519  |
| C1orf131 | METTL1 | 0.045207581 | 0.452384578  |
| GALNT2   | METTL1 | 0.007289856 | -0.580452869 |
| ACP1     | METTL1 | 6.24E-05    | 0.773883149  |
| SNAP47   | METTL1 | 0.04284613  | 0.456893762  |
| DEGS1    | METTL1 | 0.002394352 | 0.639543456  |
| FBXO28   | METTL1 | 0.00498587  | 0.60191138   |
| ARF1     | METTL1 | 0.010695703 | -0.557242873 |
| CNIH4    | METTL1 | 0.044798805 | -0.453151933 |
| CNIH3    | METTL1 | 0.023661509 | -0.503375562 |
| PARP1    | METTL1 | 0.009921554 | 0.561922876  |
| PYCR2    | METTL1 | 2.15E-07    | 0.885193118  |
| SOX13    | METTL1 | 0.045842239 | -0.45120371  |
| ARL8A    | METTL1 | 2.12E-04    | -0.736643824 |
| EML4     | METTL1 | 4.98E-04    | 0.706489106  |
| RPS27A   | METTL1 | 5.16E-05    | 0.779106902  |
| ETAA1    | METTL1 | 1.06E-04    | 0.758457356  |
| SNRPG    | METTL1 | 1.60E-04    | 0.745836118  |
| MEIS1    | METTL1 | 0.010596828 | -0.557824977 |
| TPRKB    | METTL1 | 4.72E-04    | 0.708448229  |
| SFXN5    | METTL1 | 9.81E-04    | -0.679602638 |
| DUSP11   | METTL1 | 4.56E-04    | 0.709777299  |
| ZC3H8    | METTL1 | 0.002965246 | 0.629050834  |
| LIPT1    | METTL1 | 0.002005509 | 0.647961455  |
| TRIM43CP | METTL1 | 1.97E-04    | 0.739023868  |
| AFF3     | METTL1 | 0.00701623  | 0.582680729  |
| POLR2D   | METTL1 | 0.001477349 | 0.661921073  |
| PHOSPHO2 | METTL1 | 0.048208237 | 0.446909228  |
| HSPD1    | METTL1 | 5.28E-04    | 0.704284531  |
| UNC80    | METTL1 | 0.009710284 | 0.563251496  |
| SPAG16   | METTL1 | 1.54E-05    | 0.809457148  |
| SUMF1    | METTL1 | 1.16E-04    | -0.755834073 |
| HES6     | METTL1 | 1.58E-04    | -0.746125289 |
| DIS3L2   | METTL1 | 0.044272757 | 0.454147405  |
| FANCD2   | METTL1 | 0.00474132  | 0.604645637  |

|          |        |             |              |
|----------|--------|-------------|--------------|
| TAMM41   | METTL1 | 0.035404831 | 0.472490934  |
| CTDSP1   | METTL1 | 3.86E-04    | -0.715850147 |
| STK11IP  | METTL1 | 0.00162385  | -0.657676131 |
| RBMS3    | METTL1 | 0.03532736  | 0.472666202  |
| OSBPL10  | METTL1 | 0.00256412  | 0.636222914  |
| SLC25A38 | METTL1 | 0.00347779  | 0.620979109  |
| GOLGA4   | METTL1 | 0.033211844 | 0.47757233   |
| CTDSPL   | METTL1 | 0.034156432 | -0.475352463 |
| IQSEC1   | METTL1 | 0.034916318 | -0.473601169 |
| RPL32    | METTL1 | 3.03E-05    | 0.793044251  |
| SLC25A26 | METTL1 | 2.19E-05    | 0.801090195  |
| TMF1     | METTL1 | 0.001743055 | 0.654453126  |
| ADPRH    | METTL1 | 0.032538686 | -0.479184596 |
| MED12L   | METTL1 | 0.007820395 | -0.576321391 |
| EIF2A    | METTL1 | 0.049026736 | 0.445461254  |
| NCEH1    | METTL1 | 0.024113955 | -0.501982429 |
| SPATA16  | METTL1 | 0.007117936 | 0.581844462  |
| EAF2     | METTL1 | 1.01E-04    | 0.760021674  |
| EIF2B5   | METTL1 | 0.001109293 | 0.674400808  |
| DGKQ     | METTL1 | 0.022310194 | -0.507666019 |
| FIP1L1   | METTL1 | 0.011638088 | 0.551903168  |
| CENPC    | METTL1 | 0.004597484 | 0.606308672  |
| OCIAD2   | METTL1 | 1.40E-06    | 0.856923876  |
| ENOPH1   | METTL1 | 0.006636854 | 0.585890437  |
| TRMT10A  | METTL1 | 0.006280165 | 0.589048509  |
| TBCK     | METTL1 | 0.002133322 | 0.645054465  |
| CAMK2D   | METTL1 | 0.001978857 | 0.648587075  |
| CISD2    | METTL1 | 0.034622278 | 0.474275279  |
| TIFA     | METTL1 | 0.002286342 | 0.641759822  |
| METTL14  | METTL1 | 0.017923209 | 0.523193146  |
| USP53    | METTL1 | 0.032788026 | 0.478584396  |
| RPS3A    | METTL1 | 0.002193087 | 0.643744892  |
| RPL37    | METTL1 | 9.09E-05    | 0.763113634  |
| ANKRD31  | METTL1 | 0.001006611 | 0.678504918  |
| IQGAP2   | METTL1 | 0.03200632  | -0.480478227 |
| PAM      | METTL1 | 0.001021968 | -0.677869293 |
| BDP1     | METTL1 | 0.043170927 | 0.456262373  |
| BTF3     | METTL1 | 2.98E-04    | 0.725035208  |
| TNFAIP8  | METTL1 | 3.13E-07    | 0.880082794  |
| ATG12    | METTL1 | 0.030295037 | 0.484754044  |
| YIPF5    | METTL1 | 0.039758258 | 0.463089102  |
| ARHGAP26 | METTL1 | 0.002149229 | -0.644702954 |
| CXCL14   | METTL1 | 0.002855514 | 0.630928349  |
| DDX46    | METTL1 | 0.011900106 | 0.550480934  |
| RNF145   | METTL1 | 8.65E-04    | 0.684775682  |
| C1QTNF2  | METTL1 | 0.029406482 | 0.487049346  |
| G3BP1    | METTL1 | 0.043039506 | 0.456517405  |
| N4BP3    | METTL1 | 0.019744476 | 0.516415145  |
| NHP2     | METTL1 | 2.09E-04    | 0.737181941  |
| RMND5B   | METTL1 | 0.020745827 | 0.512898618  |
| BOD1     | METTL1 | 0.01215569  | 0.54911783   |
| TENM2    | METTL1 | 0.012381649 | 0.547931892  |
| FARS2    | METTL1 | 2.36E-05    | 0.79932846   |
| CDKAL1   | METTL1 | 8.60E-04    | 0.685039839  |

|            |        |             |              |
|------------|--------|-------------|--------------|
| ZMAT2      | METTL1 | 0.001723797 | 0.654961029  |
| DCDC2      | METTL1 | 0.049837547 | 0.444045027  |
| TRIM7      | METTL1 | 0.005976717 | -0.591853319 |
| DOK3       | METTL1 | 0.001859649 | -0.651474725 |
| PPP1R18    | METTL1 | 0.032422616 | -0.479465225 |
| RPL7L1     | METTL1 | 0.046553453 | 0.449895244  |
| PM20D2     | METTL1 | 0.014865972 | 0.535925905  |
| RARS2      | METTL1 | 0.002774597 | 0.632351701  |
| GPR6       | METTL1 | 1.97E-04    | 0.739023868  |
| RNF217     | METTL1 | 0.00258648  | -0.635799347 |
| SLC18B1    | METTL1 | 0.015322012 | 0.533900529  |
| WTAP       | METTL1 | 5.81E-04    | 0.70056663   |
| VWDE       | METTL1 | 0.015097821 | 0.534890066  |
| WASH2P     | METTL1 | 0.012809617 | -0.545732833 |
| RBAK       | METTL1 | 0.010119012 | 0.560701747  |
| CREB5      | METTL1 | 0.028386487 | -0.489752329 |
| PURB       | METTL1 | 0.00527235  | 0.598845577  |
| ZNF92      | METTL1 | 0.010271767 | 0.559770282  |
| SLC12A9    | METTL1 | 0.001784501 | -0.653375768 |
| TMEM140    | METTL1 | 0.048088335 | -0.447122922 |
| TLK2       | METTL1 | 0.01854273  | 0.52082825   |
| NLGN4X     | METTL1 | 3.08E-04    | 0.723964514  |
| LANCL3     | METTL1 | 0.036946903 | -0.469062788 |
| CASK       | METTL1 | 2.61E-04    | 0.72961982   |
| KDM6A      | METTL1 | 0.019377395 | 0.517739882  |
| CCNB3      | METTL1 | 0.024289761 | 0.50144668   |
| ZNF157     | METTL1 | 0.005159439 | 0.600037113  |
| ZNF182     | METTL1 | 0.02319091  | 0.504847153  |
| CHST7      | METTL1 | 0.030214667 | -0.484959464 |
| NDUFB11    | METTL1 | 0.024118287 | 0.50196919   |
| ZNF41      | METTL1 | 0.02149621  | 0.510350943  |
| GPR174     | METTL1 | 0.01049074  | 0.558454464  |
| NONO       | METTL1 | 0.009764232 | 0.562910014  |
| IL2RG      | METTL1 | 3.78E-04    | 0.716646627  |
| ZNF711     | METTL1 | 0.00571821  | 0.59433662   |
| PRPS1      | METTL1 | 2.04E-07    | 0.885921759  |
| CXorf57    | METTL1 | 0.043104269 | 0.456391653  |
| RBMX       | METTL1 | 2.17E-04    | 0.735902728  |
| MCPH1      | METTL1 | 0.0016612   | 0.656645535  |
| MFHAS1     | METTL1 | 0.003997845 | 0.613742362  |
| FBXO25     | METTL1 | 0.002232962 | 0.642887615  |
| ZNF185     | METTL1 | 0.010174596 | -0.560361498 |
| RPL10      | METTL1 | 0.002092425 | 0.645968404  |
| CSGALNACT1 | METTL1 | 0.039301443 | 0.464036977  |
| ATP6V1B2   | METTL1 | 0.038022071 | -0.466737877 |
| CCDC25     | METTL1 | 4.63E-04    | 0.709213502  |
| DOK2       | METTL1 | 0.004524242 | -0.607172065 |
| CHMP7      | METTL1 | 0.003547272 | 0.619962323  |
| DOCK5      | METTL1 | 0.002638101 | -0.634833003 |
| MRPS28     | METTL1 | 0.002543019 | 0.636625477  |
| TERF1      | METTL1 | 0.028377106 | 0.489777541  |
| RPL7       | METTL1 | 0.004525786 | 0.607153738  |
| EBAG9      | METTL1 | 0.021302335 | 0.511002319  |
| POLR2K     | METTL1 | 1.40E-05    | 0.811703175  |

|          |        |             |              |
|----------|--------|-------------|--------------|
| EIF3H    | METTL1 | 8.23E-04    | 0.686838977  |
| UTP23    | METTL1 | 5.28E-06    | 0.832500711  |
| NDUFB9   | METTL1 | 0.002731217 | 0.63312904   |
| TATDN1   | METTL1 | 2.95E-06    | 0.843719436  |
| GSDMC    | METTL1 | 0.001681212 | 0.656101289  |
| FAM135B  | METTL1 | 0.025227117 | 0.498640869  |
| SLC39A4  | METTL1 | 0.00816538  | -0.573756242 |
| AK3      | METTL1 | 0.002826932 | 0.631427238  |
| UHRF2    | METTL1 | 4.31E-04    | 0.711822747  |
| ZCCHC7   | METTL1 | 8.72E-06    | 0.822084515  |
| FBXO10   | METTL1 | 0.029958301 | 0.4856176    |
| UGCG     | METTL1 | 0.034176614 | 0.475305557  |
| SNX30    | METTL1 | 0.014194827 | -0.538999451 |
| GSN      | METTL1 | 0.018566378 | -0.520739235 |
| ASTN2    | METTL1 | 9.36E-04    | 0.681515412  |
| WDR31    | METTL1 | 0.048872445 | 0.445732779  |
| POLE3    | METTL1 | 3.10E-05    | 0.792541978  |
| SURF1    | METTL1 | 0.010214469 | 0.560118344  |
| SURF2    | METTL1 | 5.89E-04    | 0.700095166  |
| RPL7A    | METTL1 | 6.94E-04    | 0.693677951  |
| ASB6     | METTL1 | 0.004690192 | -0.605231941 |
| SLC25A25 | METTL1 | 0.029438243 | -0.48696637  |
| NOTCH1   | METTL1 | 0.026513992 | -0.494919997 |
| NACC2    | METTL1 | 6.25E-04    | -0.697749009 |
| USP6NL   | METTL1 | 0.001512098 | 0.660883281  |
| COMMD3   | METTL1 | 0.014725601 | 0.536559371  |
| FAM171A1 | METTL1 | 0.003873701 | 0.61539563   |
| ZEB1     | METTL1 | 3.80E-04    | 0.716444808  |
| NRBF2    | METTL1 | 0.006356603 | 0.588359567  |
| A1CF     | METTL1 | 0.008240315 | 0.573210796  |
| ADD3     | METTL1 | 0.001393712 | 0.664505691  |
| DNAJB12  | METTL1 | 0.033886016 | -0.475983018 |
| EIF4EBP2 | METTL1 | 0.012683389 | -0.546375189 |
| PLEKHS1  | METTL1 | 0.014216026 | 0.5389006    |
| ADM      | METTL1 | 0.041873603 | -0.458806665 |
| GAS2     | METTL1 | 0.010563346 | 0.558023091  |
| IMMP1L   | METTL1 | 1.61E-04    | 0.745624092  |
| SAA4     | METTL1 | 0.004423062 | 0.608383997  |
| PGAP2    | METTL1 | 0.00820602  | 0.573459924  |
| DGKZ     | METTL1 | 0.032673482 | -0.478859678 |
| EIF3M    | METTL1 | 0.001640448 | 0.657215713  |
| SSRP1    | METTL1 | 3.86E-04    | 0.715889152  |
| PTPRJ    | METTL1 | 0.005739162 | -0.594131944 |
| SESN3    | METTL1 | 0.001386308 | 0.664740713  |
| ENDOD1   | METTL1 | 0.044657218 | 0.453418976  |
| TENM4    | METTL1 | 0.012518651 | 0.547221329  |
| RPS3     | METTL1 | 8.75E-04    | 0.684306963  |
| ZC3H12C  | METTL1 | 0.007572223 | -0.578224486 |
| DRD2     | METTL1 | 0.011528274 | 0.552506952  |
| NPAT     | METTL1 | 0.02714514  | 0.493146941  |
| AASDHPPT | METTL1 | 0.007780137 | 0.576626719  |
| GRIK4    | METTL1 | 0.042974425 | -0.456643922 |
| TMC2     | METTL1 | 0.002950273 | -0.629303586 |
| ESAM     | METTL1 | 0.019763634 | -0.516346549 |

|           |        |             |              |
|-----------|--------|-------------|--------------|
| KIRREL3   | METTL1 | 0.032210957 | -0.47997899  |
| COMMD7    | METTL1 | 0.032490954 | -0.479299906 |
| C20orf144 | METTL1 | 0.010000007 | 0.56143536   |
| DSN1      | METTL1 | 0.00122703  | 0.670071756  |
| GPHA2     | METTL1 | 0.00200167  | 0.648051145  |
| NUDT22    | METTL1 | 0.025130142 | -0.498927286 |
| FERMT3    | METTL1 | 0.002736835 | -0.633027787 |
| PLCB3     | METTL1 | 0.003096855 | -0.626873783 |
| MRPL49    | METTL1 | 0.011879028 | 0.550594407  |
| FAU       | METTL1 | 7.17E-05    | 0.769991823  |
| PPP4C     | METTL1 | 0.019454826 | -0.517458794 |
| ALDOA     | METTL1 | 7.83E-04    | -0.688846424 |
| HIRIP3    | METTL1 | 0.002476665 | 0.637909776  |
| CNKSR2    | METTL1 | 8.63E-05    | 0.764625571  |
| CLEC1A    | METTL1 | 0.047023476 | -0.449038921 |
| CWC15     | METTL1 | 1.50E-04    | 0.747861066  |
| ARID5B    | METTL1 | 0.012700545 | 0.546287579  |
| TMCO3     | METTL1 | 4.67E-04    | -0.708845922 |
| LATS2     | METTL1 | 2.05E-04    | -0.737705598 |
| SAP18     | METTL1 | 8.59E-04    | 0.685073961  |
| CTAGE5    | METTL1 | 0.001870035 | 0.651217065  |
| PDCD4     | METTL1 | 1.64E-04    | 0.745089338  |
| GPM6A     | METTL1 | 3.00E-06    | 0.843412909  |
| VEGFC     | METTL1 | 0.027371074 | -0.492520127 |
| CCDC102B  | METTL1 | 4.83E-05    | 0.780892392  |
| CNDP1     | METTL1 | 0.019557839 | 0.517086213  |
| RGS18     | METTL1 | 0.004483438 | -0.607658096 |
| C11orf57  | METTL1 | 0.024453559 | 0.500950186  |
| IL18      | METTL1 | 0.012096111 | -0.549433497 |
| FOXO1     | METTL1 | 3.96E-04    | 0.71490472   |
| ITPR1     | METTL1 | 2.02E-04    | 0.738325633  |
| PRSS53    | METTL1 | 0.044295404 | 0.45410436   |
| CACNA2D4  | METTL1 | 0.018975613 | -0.51921299  |
| NGLY1     | METTL1 | 0.002077279 | 0.646310682  |
| OXSM      | METTL1 | 0.017993972 | 0.522919748  |
| C12orf45  | METTL1 | 0.00112701  | 0.673725368  |
| ANK3      | METTL1 | 0.008743055 | 0.569652518  |
| IPMK      | METTL1 | 0.01683013  | -0.527530113 |
| PLBD2     | METTL1 | 7.30E-05    | -0.769473026 |
| DLG5      | METTL1 | 0.044581697 | -0.453561681 |
| DIP2C     | METTL1 | 1.04E-04    | 0.759242374  |
| EIF4E     | METTL1 | 0.013898464 | 0.540394016  |
| TEX30     | METTL1 | 7.10E-08    | 0.899099287  |
| CSNK1G3   | METTL1 | 8.17E-04    | 0.687131247  |
| NPAS3     | METTL1 | 0.004669609 | 0.605469475  |
| FAM177A1  | METTL1 | 0.011007994 | 0.555432564  |
| MBIP      | METTL1 | 2.96E-04    | 0.72531374   |
| MIPOL1    | METTL1 | 3.22E-04    | 0.722390343  |
| TMEM18    | METTL1 | 0.034654729 | 0.474200663  |
| NDUFC2    | METTL1 | 3.76E-04    | 0.716832336  |
| NUBPL     | METTL1 | 0.03795174  | 0.466888387  |
| ATP6V1G3  | METTL1 | 0.002846357 | 0.631087723  |
| ANKRD50   | METTL1 | 0.039788931 | -0.46302576  |
| UPF2      | METTL1 | 0.008968486 | 0.568110934  |

|          |        |             |              |
|----------|--------|-------------|--------------|
| CDC123   | METTL1 | 0.001289516 | 0.667914626  |
| PTPRO    | METTL1 | 0.040382837 | 0.461806683  |
| THYN1    | METTL1 | 0.003152028 | 0.625983958  |
| NCAPD3   | METTL1 | 0.006669821 | 0.585605634  |
| DRD3     | METTL1 | 0.040297973 | 0.461980024  |
| MMAA     | METTL1 | 0.005133371 | 0.600315263  |
| NR3C2    | METTL1 | 0.004676818 | 0.605386176  |
| VENTX    | METTL1 | 0.011100372 | -0.554905043 |
| ADAM8    | METTL1 | 0.003238203 | -0.624619683 |
| ASAP2    | METTL1 | 0.008526407 | -0.571164884 |
| TMEM45B  | METTL1 | 0.011043456 | 0.555229637  |
| AMN1     | METTL1 | 0.002066757 | 0.646549664  |
| BICD1    | METTL1 | 0.006471593 | 0.587335854  |
| SAV1     | METTL1 | 0.001370925 | 0.665232436  |
| ZNF385D  | METTL1 | 0.027693866 | -0.491631628 |
| GABRA2   | METTL1 | 0.004779488 | 0.604211338  |
| PABPC3   | METTL1 | 0.03485041  | 0.473751883  |
| FBXO4    | METTL1 | 0.010541062 | 0.55815523   |
| CCL28    | METTL1 | 0.019476736 | 0.517379416  |
| KCNE4    | METTL1 | 0.006751924 | 0.584901332  |
| FAM168B  | METTL1 | 3.67E-05    | 0.78820657   |
| MGAT5    | METTL1 | 2.23E-04    | 0.734920579  |
| RNF219   | METTL1 | 0.004717923 | 0.604913291  |
| ARL14EP  | METTL1 | 1.57E-04    | 0.746384899  |
| PSTPIP2  | METTL1 | 0.008152913 | -0.57384739  |
| ATP5A1   | METTL1 | 0.035599323 | 0.472052234  |
| HAUS1    | METTL1 | 0.001815942 | 0.652572382  |
| C18orf25 | METTL1 | 0.013745684 | 0.541122317  |
| PDK1     | METTL1 | 0.040390325 | 0.4617914    |
| SPON1    | METTL1 | 0.011409286 | 0.553166463  |
| PDE3B    | METTL1 | 0.030639844 | 0.483877553  |
| TGOLN2   | METTL1 | 0.011003734 | -0.555456973 |
| KCNK13   | METTL1 | 0.045409371 | -0.452007745 |
| SPOCK1   | METTL1 | 0.01508575  | -0.534943681 |
| TADA1    | METTL1 | 0.036912539 | 0.46913796   |
| JMY      | METTL1 | 0.001059994 | 0.676329347  |
| ZNF547   | METTL1 | 0.001198036 | 0.671104249  |
| ZNF773   | METTL1 | 9.23E-05    | 0.762671509  |
| ZNF776   | METTL1 | 6.10E-06    | 0.829569971  |
| ZNF256   | METTL1 | 2.05E-05    | 0.802663756  |
| USP12    | METTL1 | 8.44E-04    | 0.685789323  |
| CCDC50   | METTL1 | 0.001780976 | 0.653466574  |
| CAMK4    | METTL1 | 0.001619561 | 0.657795769  |
| PFKM     | METTL1 | 3.60E-04    | 0.718382168  |
| TMEM123  | METTL1 | 0.011555495 | 0.552356851  |
| MBNL1    | METTL1 | 2.20E-04    | 0.735374219  |
| CAPSL    | METTL1 | 0.002385261 | 0.639726759  |
| DDX4     | METTL1 | 0.006536778 | 0.586762148  |
| PELO     | METTL1 | 0.001374459 | 0.665119065  |
| RASGRP3  | METTL1 | 0.002012335 | 0.647802343  |
| WDR78    | METTL1 | 7.00E-04    | 0.693299942  |
| PANK1    | METTL1 | 0.008003825 | 0.574946239  |
| HNRNPDL  | METTL1 | 5.53E-06    | 0.831550525  |
| PTPRK    | METTL1 | 4.66E-04    | 0.708947642  |

|          |        |             |              |
|----------|--------|-------------|--------------|
| RAD17    | METTL1 | 0.0048596   | 0.603309005  |
| STK32B   | METTL1 | 0.040082035 | -0.462422374 |
| CWC27    | METTL1 | 2.61E-04    | 0.729668816  |
| SRP19    | METTL1 | 0.002976114 | 0.628868047  |
| CENPH    | METTL1 | 0.030462719 | 0.48432683   |
| BANK1    | METTL1 | 0.00348712  | 0.620841601  |
| DAB2     | METTL1 | 0.00306987  | -0.627313818 |
| SCOC     | METTL1 | 0.003346795 | 0.622942821  |
| CETN3    | METTL1 | 0.021480121 | 0.51040482   |
| SMARCA5  | METTL1 | 0.002376829 | 0.639897285  |
| RGPD3    | METTL1 | 5.01E-04    | 0.706261911  |
| RANBP2   | METTL1 | 0.03801532  | 0.466752315  |
| AHCTF1   | METTL1 | 0.014402037 | 0.538038267  |
| PTPRR    | METTL1 | 0.040568162 | -0.461429119 |
| NR4A2    | METTL1 | 0.004573029 | 0.606595672  |
| CCDC148  | METTL1 | 0.026087833 | -0.496136095 |
| SCN3A    | METTL1 | 0.002607639 | 0.635401327  |
| CD96     | METTL1 | 0.019026286 | 0.51902584   |
| TRAPPC8  | METTL1 | 0.009878713 | 0.562190419  |
| INO80C   | METTL1 | 0.010384999 | 0.559087054  |
| LPCAT1   | METTL1 | 0.026965449 | -0.4936484   |
| UBALD1   | METTL1 | 0.015664893 | -0.532409381 |
| TMEM251  | METTL1 | 0.00684047  | 0.584149588  |
| ING1     | METTL1 | 0.004087523 | -0.612574341 |
| TEX29    | METTL1 | 0.027696198 | 0.491625239  |
| CMTM7    | METTL1 | 0.001473223 | -0.662045658 |
| RPIA     | METTL1 | 0.005035537 | 0.601369629  |
| TUBGCP5  | METTL1 | 0.013989545 | 0.539962895  |
| CFDP1    | METTL1 | 1.91E-04    | 0.740148896  |
| ZDHHC7   | METTL1 | 0.00175355  | -0.654178298 |
| CMIP     | METTL1 | 3.46E-05    | -0.789695722 |
| CEBPG    | METTL1 | 0.013036774 | 0.544589622  |
| KCTD15   | METTL1 | 0.012122933 | -0.549291229 |
| CLCA3P   | METTL1 | 0.006441708 | 0.587600468  |
| HS2ST1   | METTL1 | 2.82E-05    | 0.7948754    |
| MSI2     | METTL1 | 0.02665548  | 0.494519651  |
| GDPD1    | METTL1 | 0.008984069 | 0.568005547  |
| AK5      | METTL1 | 0.017324822 | 0.525540244  |
| CABYR    | METTL1 | 0.041983913 | 0.458587977  |
| IMPACT   | METTL1 | 0.03083047  | 0.483396304  |
| C16orf74 | METTL1 | 0.003121284 | 0.626478175  |
| NRGN     | METTL1 | 0.01082344  | -0.556497283 |
| GPR15    | METTL1 | 0.027457037 | 0.492282707  |
| CC2D1B   | METTL1 | 0.021821893 | 0.509267145  |
| CERS3    | METTL1 | 0.023309685 | 0.504473521  |
| PRKCA    | METTL1 | 0.036756061 | 0.469480939  |
| LRRK1    | METTL1 | 0.012823562 | -0.545662183 |
| CEP112   | METTL1 | 2.81E-04    | 0.727148172  |
| ABCA10   | METTL1 | 0.006139418 | 0.590335279  |
| MIA3     | METTL1 | 0.002826957 | 0.631426792  |
| DISP1    | METTL1 | 0.023899706 | 0.502639522  |
| TDH      | METTL1 | 0.007079191 | 0.582161877  |
| WNT3A    | METTL1 | 0.007244951 | 0.580813737  |
| BUB3     | METTL1 | 0.001907887 | 0.650288071  |



|          |        |             |              |
|----------|--------|-------------|--------------|
| FAM69A   | METTL1 | 2.10E-05    | 0.802135638  |
| ATP5G3   | METTL1 | 0.00277157  | 0.63240561   |
| CEP170P1 | METTL1 | 0.016416579 | 0.529229872  |
| BTG3     | METTL1 | 0.004772173 | 0.604294343  |
| TMPRSS15 | METTL1 | 0.013759404 | 0.541056647  |
| NCAM2    | METTL1 | 0.039237525 | 0.464170285  |
| MRPL39   | METTL1 | 4.80E-05    | 0.781108266  |
| JAM2     | METTL1 | 0.03882582  | 0.465032995  |
| ATP5J    | METTL1 | 0.001907541 | 0.650296492  |
| CCDC174  | METTL1 | 7.38E-04    | 0.691230995  |
| OXNAD1   | METTL1 | 0.008148586 | 0.573879044  |
| PLCL2    | METTL1 | 3.56E-04    | 0.718795996  |
| ZNF18    | METTL1 | 0.018757107 | 0.520024606  |
| FBXL18   | METTL1 | 0.030015293 | -0.485470911 |
| AZIN1    | METTL1 | 0.009341256 | 0.565629686  |
| GTF3C6   | METTL1 | 0.030795881 | 0.483483452  |
| AGPAT5   | METTL1 | 0.001531659 | 0.660307836  |
| MARVELD1 | METTL1 | 0.0096132   | -0.563869925 |
| ZFYVE27  | METTL1 | 0.00524336  | 0.599149481  |
| GOLGA7B  | METTL1 | 0.00508692  | 0.600813783  |
| HSPA13   | METTL1 | 1.24E-04    | 0.753859105  |
| ZCCHC10  | METTL1 | 0.001076994 | 0.675655942  |
| DBI      | METTL1 | 0.027658218 | 0.491729349  |
| SLC16A1  | METTL1 | 4.31E-04    | 0.711833599  |
| NIFK     | METTL1 | 2.67E-05    | 0.796271373  |
| SLC7A7   | METTL1 | 0.006598052 | -0.586227131 |
| CNOT8    | METTL1 | 7.20E-04    | 0.692176858  |
| MIER3    | METTL1 | 8.26E-05    | 0.765919678  |
| NUP205   | METTL1 | 0.04329732  | 0.456017661  |
| ZKSCAN2  | METTL1 | 7.59E-04    | 0.690087127  |
| C9orf85  | METTL1 | 0.033350896 | 0.477242476  |
| RBM45    | METTL1 | 0.042982797 | 0.45662764   |
| ALS2CR12 | METTL1 | 0.008441258 | 0.571767873  |
| ELMO1    | METTL1 | 0.019421533 | 0.517579545  |
| LSM11    | METTL1 | 0.018171829 | 0.522236359  |
| RASA2    | METTL1 | 0.003063904 | 0.627411524  |
| RAB39B   | METTL1 | 1.72E-05    | 0.806912811  |
| MICU3    | METTL1 | 0.024899019 | 0.499613451  |
| PSD3     | METTL1 | 0.012032526 | 0.549771777  |
| GPR61    | METTL1 | 0.011945275 | 0.550238327  |
| ADK      | METTL1 | 3.93E-04    | 0.715189616  |
| DCK      | METTL1 | 0.00125187  | 0.669203395  |
| NDUFAF6  | METTL1 | 0.009738849 | 0.563070495  |
| C8orf37  | METTL1 | 0.029944614 | 0.48565286   |
| ADAMTSL3 | METTL1 | 0.015624794 | 0.532582406  |
| WHAMM    | METTL1 | 0.001426875 | 0.663465657  |
| N6AMT1   | METTL1 | 0.019845046 | 0.516055632  |
| USP16    | METTL1 | 0.018935105 | 0.519362889  |
| CCT8     | METTL1 | 0.003984909 | 0.613912633  |
| ANKRD9   | METTL1 | 8.69E-04    | -0.684618686 |
| C14orf2  | METTL1 | 0.014849387 | 0.5360005    |
| UQCRB    | METTL1 | 9.61E-04    | 0.680423268  |
| RPL30    | METTL1 | 3.12E-04    | 0.723484515  |
| ZFAND3   | METTL1 | 1.01E-04    | -0.760001575 |

|           |        |             |              |
|-----------|--------|-------------|--------------|
| NPTN      | METTL1 | 0.001027293 | -0.677650751 |
| KAT6B     | METTL1 | 0.001544885 | 0.659922225  |
| SAMD8     | METTL1 | 0.027504365 | 0.492152244  |
| RAB11FIP1 | METTL1 | 0.045131365 | -0.452527244 |
| BAG4      | METTL1 | 0.003483424 | -0.620896049 |
| MS4A1     | METTL1 | 0.018276709 | 0.521835877  |
| EIF4A2    | METTL1 | 1.67E-07    | 0.888553217  |
| BRPF1     | METTL1 | 0.005086295 | -0.600820515 |
| TATDN2    | METTL1 | 0.00173194  | 0.654745696  |
| NTAN1     | METTL1 | 0.026314618 | 0.495487003  |
| FCHO2     | METTL1 | 0.030310892 | -0.48471357  |
| C1orf27   | METTL1 | 0.00733804  | 0.580067668  |
| NECAP2    | METTL1 | 0.011938638 | 0.550273929  |
| STEAP2    | METTL1 | 0.013511481 | 0.542251526  |
| MMP14     | METTL1 | 0.021377481 | -0.510749289 |
| FZD1      | METTL1 | 0.004954243 | -0.602258676 |
| SUSD3     | METTL1 | 0.009866493 | 0.562266906  |
| DDX19B    | METTL1 | 0.001267196 | 0.668674824  |
| ST3GAL2   | METTL1 | 0.013442525 | -0.542587006 |
| ZNF19     | METTL1 | 0.028464465 | 0.489543018  |
| CACNA2D3  | METTL1 | 0.02656765  | -0.494767972 |
| FAM81A    | METTL1 | 0.00956109  | 0.56420397   |
| MYO1E     | METTL1 | 0.006839034 | 0.584161717  |
| ERG       | METTL1 | 0.047785107 | -0.447665176 |
| TMEM164   | METTL1 | 0.019031359 | -0.519007123 |
| SLC38A10  | METTL1 | 0.003973804 | -0.614059173 |
| SNX22     | METTL1 | 0.006967732 | 0.583082989  |
| WDR19     | METTL1 | 0.033739325 | 0.476326715  |
| SLC37A3   | METTL1 | 0.007996945 | 0.574997348  |
| WDR66     | METTL1 | 0.049950267 | 0.443849543  |
| MRPL17    | METTL1 | 0.033027189 | 0.478012033  |
| UBXN11    | METTL1 | 0.004367237 | -0.609062504 |
| NCK1      | METTL1 | 2.99E-04    | 0.724934151  |
| AAED1     | METTL1 | 0.002122201 | -0.645301537 |
| XKR8      | METTL1 | 0.007029296 | -0.582572736 |
| GPR153    | METTL1 | 0.047070405 | -0.448953784 |
| GPRASP2   | METTL1 | 0.004141859 | 0.611876914  |
| SHROOM4   | METTL1 | 0.021464379 | -0.510457566 |
| MITD1     | METTL1 | 0.005537601 | 0.59612698   |
| TMSB15B   | METTL1 | 4.16E-04    | 0.713148023  |
| CD1D      | METTL1 | 0.00540851  | -0.597436333 |
| SNX29P1   | METTL1 | 0.026428033 | 0.495164043  |
| HMHB1     | METTL1 | 1.97E-04    | 0.739023868  |
| NCF1      | METTL1 | 0.031157658 | -0.482575698 |
| CPA5      | METTL1 | 0.032862681 | 0.478405381  |
| TSR2      | METTL1 | 9.05E-06    | 0.821274796  |
| ZFAND2B   | METTL1 | 0.00687079  | 0.583894004  |
| PKD1L1    | METTL1 | 0.016168521 | 0.530265967  |
| ELK4      | METTL1 | 0.049703193 | 0.444278476  |
| RNF166    | METTL1 | 0.003179837 | -0.625540342 |
| NBL1      | METTL1 | 1.31E-04    | 0.752184246  |
| F11R      | METTL1 | 0.027186739 | -0.493031222 |
| EDA       | METTL1 | 2.24E-04    | 0.734754962  |
| VWA5B1    | METTL1 | 8.41E-05    | 0.76539519   |

|          |        |             |              |
|----------|--------|-------------|--------------|
| CDA      | METTL1 | 0.035516611 | -0.472238573 |
| PINK1    | METTL1 | 0.002425499 | -0.638919839 |
| APOA2    | METTL1 | 0.010311204 | -0.559531633 |
| WFDC8    | METTL1 | 5.50E-06    | 0.8316513    |
| WNT9B    | METTL1 | 0.033640187 | 0.476559659  |
| CACHD1   | METTL1 | 0.035894106 | 0.471390863  |
| CDC42SE2 | METTL1 | 0.001026852 | 0.677668821  |
| RAPGEF6  | METTL1 | 1.80E-05    | 0.805814437  |
| MIS18A   | METTL1 | 0.03685244  | 0.469269555  |
| FBXW5    | METTL1 | 0.003589583 | -0.619351231 |
| SV2A     | METTL1 | 0.023165181 | 0.504928286  |
| TNNI1    | METTL1 | 0.002390662 | 0.639617796  |
| ATP5G1   | METTL1 | 0.001049548 | 0.676747671  |
| RCAN1    | METTL1 | 0.042331895 | -0.457901005 |
| SNF8     | METTL1 | 0.009304865 | 0.565868325  |
| MORC3    | METTL1 | 0.011341796 | 0.553543014  |
| ARHGAP27 | METTL1 | 0.001275005 | -0.668407599 |
| PLA2G4D  | METTL1 | 0.004779488 | 0.604211342  |
| ATP13A2  | METTL1 | 0.014823838 | -0.536115537 |
| M1AP     | METTL1 | 0.010696273 | -0.557239531 |
| PSMB4    | METTL1 | 4.01E-04    | 0.714461522  |
| C1R      | METTL1 | 0.033537717 | 0.476800994  |
| ALDH4A1  | METTL1 | 0.039400448 | -0.463830824 |
| THEM4    | METTL1 | 2.77E-04    | 0.72765789   |
| NAE1     | METTL1 | 7.08E-05    | 0.770347353  |
| CTBP1    | METTL1 | 0.026015097 | -0.496345222 |
| ZDHHC1   | METTL1 | 0.009650166 | -0.563633852 |
| ATP6V0D1 | METTL1 | 0.039320139 | -0.463998017 |
| ZYX      | METTL1 | 1.58E-04    | -0.746150088 |
| ABR      | METTL1 | 9.17E-04    | -0.682369502 |
| ZNF222   | METTL1 | 0.00102899  | 0.677581326  |
| NPR2     | METTL1 | 0.035221246 | 0.472906757  |
| ZNF233   | METTL1 | 0.045156104 | 0.452480915  |
| ZNF235   | METTL1 | 0.017193026 | 0.526065897  |
| GNE      | METTL1 | 5.44E-05    | 0.77766432   |
| PTGIR    | METTL1 | 0.049523944 | -0.444590683 |
| TMEM234  | METTL1 | 0.014458821 | 0.537776805  |
| UBE2J2   | METTL1 | 0.022829622 | -0.505993062 |
| ZNF362   | METTL1 | 0.037709342 | -0.467408791 |
| FNDC5    | METTL1 | 2.80E-05    | 0.795090246  |
| NR2F6    | METTL1 | 0.009748414 | -0.56300998  |
| CCDC58   | METTL1 | 1.85E-04    | 0.741095404  |
| KALRN    | METTL1 | 0.005353565 | 0.598001449  |
| FAM86C2P | METTL1 | 0.003573755 | 0.619579134  |
| PDE9A    | METTL1 | 2.13E-04    | 0.736483353  |
| WDR4     | METTL1 | 0.010208375 | 0.560155457  |
| G6PD     | METTL1 | 5.68E-04    | -0.701442128 |
| AGPAT3   | METTL1 | 0.001156229 | -0.67263068  |
| GAB3     | METTL1 | 0.009838124 | -0.562444771 |
| C21orf33 | METTL1 | 0.005783303 | 0.593702758  |
| ICOSLG   | METTL1 | 0.00125886  | 0.668961652  |
| ITGB2    | METTL1 | 0.001395099 | -0.664461762 |
| CLDND2   | METTL1 | 0.013606915 | -0.541789501 |
| ZNF761   | METTL1 | 0.003088001 | 0.627017801  |

|          |        |             |              |
|----------|--------|-------------|--------------|
| TOR2A    | METTL1 | 1.81E-05    | -0.805640126 |
| SHKBP1   | METTL1 | 0.003065218 | -0.627389988 |
| ZDHHC12  | METTL1 | 0.020330459 | -0.514340533 |
| MED27    | METTL1 | 0.020212236 | 0.514755219  |
| DEDD2    | METTL1 | 0.027835639 | -0.491243967 |
| CHTOP    | METTL1 | 5.36E-06    | 0.832198483  |
| CXCR5    | METTL1 | 7.89E-05    | 0.767238749  |
| ZBTB7B   | METTL1 | 0.002828946 | -0.631391935 |
| SHC1     | METTL1 | 0.04524648  | -0.452311834 |
| NLRX1    | METTL1 | 0.006341001 | -0.588499636 |
| ANO10    | METTL1 | 0.039677211 | -0.463256654 |
| FDPS     | METTL1 | 0.010322386 | 0.559464104  |
| RUSC1    | METTL1 | 0.017724256 | -0.523966465 |
| FAM189B  | METTL1 | 0.012705164 | -0.546264012 |
| NBEAL2   | METTL1 | 0.005333103 | -0.598213132 |
| CCDC12   | METTL1 | 0.00560122  | 0.595490917  |
| GPATCH4  | METTL1 | 1.12E-06    | 0.860666206  |
| LRRC71   | METTL1 | 0.019009856 | -0.519086477 |
| NACC1    | METTL1 | 0.022779715 | -0.506152482 |
| HK3      | METTL1 | 0.006046986 | -0.59119358  |
| LY6K     | METTL1 | 0.011354631 | 0.55347126   |
| ZNF394   | METTL1 | 0.049380885 | 0.444840479  |
| PTGER1   | METTL1 | 0.018175946 | -0.522220606 |
| PPP1R16A | METTL1 | 0.020067835 | -0.515264355 |
| MGAT4B   | METTL1 | 0.002127699 | -0.645179267 |
| RPL8     | METTL1 | 0.001599417 | 0.658361138  |
| PSMC2    | METTL1 | 0.027188345 | 0.493026759  |
| MFSD12   | METTL1 | 0.018131985 | -0.522388988 |
| DVL3     | METTL1 | 0.001061771 | -0.676258555 |
| AP2M1    | METTL1 | 0.040880675 | -0.460795445 |
| U2AF1L4  | METTL1 | 2.04E-04    | 0.737926819  |
| COX7A1   | METTL1 | 0.026745596 | -0.494265536 |
| SAP30BP  | METTL1 | 0.024476896 | 0.500879768  |
| SRSF2    | METTL1 | 4.42E-05    | 0.783264417  |
| ITGA5    | METTL1 | 0.007378317 | -0.579747267 |
| ZNF385A  | METTL1 | 3.55E-04    | -0.718872462 |
| SIGLEC16 | METTL1 | 0.012211122 | -0.548825259 |
| MPP3     | METTL1 | 0.001033877 | -0.677381869 |
| CD300LG  | METTL1 | 0.034476379 | 0.474611422  |
| EMC10    | METTL1 | 0.003144785 | -0.626100032 |
| JOSD2    | METTL1 | 7.80E-05    | -0.767568444 |
| FAM171A2 | METTL1 | 0.046497023 | -0.449998498 |
| ASGR2    | METTL1 | 0.028063822 | -0.490623279 |
| RPL26    | METTL1 | 4.58E-04    | 0.709583169  |
| POLR3K   | METTL1 | 0.005313013 | 0.598421612  |
| SNRNP25  | METTL1 | 0.02392632  | 0.502557645  |
| HS3ST6   | METTL1 | 1.97E-04    | 0.739023868  |
| PAQR4    | METTL1 | 0.001347966 | -0.665974989 |
| ZNF75A   | METTL1 | 0.004530841 | 0.607093802  |
| ADCY9    | METTL1 | 0.033008024 | -0.478057779 |
| CLPB     | METTL1 | 0.043701336 | -0.45523912  |
| CYB561A3 | METTL1 | 2.04E-04    | 0.737991618  |
| UBXN1    | METTL1 | 2.62E-04    | 0.729558714  |
| RPL29    | METTL1 | 0.012062568 | 0.549611772  |

|          |        |             |              |
|----------|--------|-------------|--------------|
| DCP1A    | METTL1 | 0.006396647 | 0.588001361  |
| ZFPL1    | METTL1 | 0.017010734 | 0.526798282  |
| RPS6KA4  | METTL1 | 0.001153984 | -0.672713953 |
| TPCN2    | METTL1 | 0.026078062 | -0.496164163 |
| TAL1     | METTL1 | 0.032046964 | -0.480378872 |
| BEND5    | METTL1 | 0.001473206 | 0.66204616   |
| C1orf123 | METTL1 | 0.043780498 | 0.455087223  |
| MAGOH    | METTL1 | 7.44E-04    | 0.69091299   |
| ACOT11   | METTL1 | 0.031944737 | -0.480628955 |
| JAK1     | METTL1 | 0.035412114 | 0.472474473  |
| RBP7     | METTL1 | 0.044030974 | -0.454608003 |
| MATN1    | METTL1 | 0.002749575 | 0.632798833  |
| SDC3     | METTL1 | 0.022981231 | -0.50551046  |
| PEF1     | METTL1 | 0.04963758  | 0.444392658  |
| KIAA1522 | METTL1 | 0.002075641 | -0.64634782  |
| NFIA     | METTL1 | 0.011584529 | -0.552197071 |
| OMA1     | METTL1 | 0.013815176 | 0.540790246  |
| USP1     | METTL1 | 0.002381554 | 0.639801657  |
| LRRIQ3   | METTL1 | 0.018448675 | 0.521183181  |
| TYW3     | METTL1 | 1.56E-06    | 0.855145871  |
| FAM102B  | METTL1 | 0.009881666 | -0.562171947 |
| PEX19    | METTL1 | 1.97E-04    | 0.73908122   |
| NCSTN    | METTL1 | 0.035032108 | -0.473336927 |
| OLFML2B  | METTL1 | 0.009251077 | -0.566222444 |
| C1orf74  | METTL1 | 0.01077653  | 0.556770264  |
| AXDND1   | METTL1 | 0.021141618 | 0.511545876  |
| TFB2M    | METTL1 | 2.10E-05    | 0.802106871  |
| CNST     | METTL1 | 0.001454533 | 0.662613709  |
| PM20D1   | METTL1 | 0.001766181 | 0.65384938   |
| HAAO     | METTL1 | 0.018812013 | -0.519819955 |
| IL24     | METTL1 | 0.003056803 | 0.627528038  |
| MEMO1    | METTL1 | 0.01340359  | -0.54277704  |
| PQLC3    | METTL1 | 0.002933228 | -0.629592613 |
| FRZB     | METTL1 | 0.001375003 | 0.665101616  |
| NUP35    | METTL1 | 1.77E-05    | 0.806233648  |
| CCDC138  | METTL1 | 0.040954659 | 0.46064598   |
| SMC6     | METTL1 | 2.68E-04    | 0.728729779  |
| H3F3A    | METTL1 | 2.10E-04    | -0.736997752 |
| SGPP2    | METTL1 | 0.048059088 | 0.447175109  |
| SMARCD1  | METTL1 | 0.008219078 | 0.573364967  |
| CTSS     | METTL1 | 0.015384212 | -0.533628054 |
| ERCC3    | METTL1 | 0.002475497 | 0.637932639  |
| IWS1     | METTL1 | 0.022938508 | 0.505646202  |
| BOLA3    | METTL1 | 2.37E-05    | 0.799223078  |
| CDC42EP3 | METTL1 | 0.034734756 | -0.474016889 |
| BMP10    | METTL1 | 0.003964933 | 0.614176475  |
| FZD5     | METTL1 | 3.91E-04    | -0.715422268 |
| DCAF16   | METTL1 | 0.007569194 | 0.578248022  |
| GNPDA2   | METTL1 | 9.61E-04    | 0.680455289  |
| HELQ     | METTL1 | 0.00104417  | 0.676964417  |
| MRPS18C  | METTL1 | 0.007493499 | 0.578838831  |
| CGGBP1   | METTL1 | 0.039373607 | 0.463886674  |
| PBXIP1   | METTL1 | 0.010393377 | 0.55903674   |
| LENEP    | METTL1 | 1.17E-04    | 0.755516642  |

|          |        |             |              |
|----------|--------|-------------|--------------|
| KBTBD8   | METTL1 | 0.001153076 | 0.672747662  |
| LMOD3    | METTL1 | 0.015694815 | 0.532280499  |
| SLC22A15 | METTL1 | 0.024989573 | -0.499344017 |
| ATP1A1   | METTL1 | 0.0100446   | 0.561159638  |
| FSTL1    | METTL1 | 0.012400039 | -0.547836144 |
| IGFBP7   | METTL1 | 0.018802821 | -0.519854185 |
| KRTCAP2  | METTL1 | 0.001611006 | 0.658035153  |
| CCT3     | METTL1 | 0.001724424 | 0.654944435  |
| SSR2     | METTL1 | 0.023917175 | 0.502585771  |
| SRGAP2   | METTL1 | 0.023892471 | -0.502661795 |
| CCDC141  | METTL1 | 3.41E-04    | 0.720330523  |
| TGFBP2   | METTL1 | 0.014192446 | 0.539010561  |
| TRAT1    | METTL1 | 0.002081901 | 0.646205996  |
| STT3B    | METTL1 | 0.04771362  | 0.447793399  |
| DPPA2    | METTL1 | 0.0235977   | 0.503573729  |
| FCRL1    | METTL1 | 0.007049726 | 0.582404215  |
| SERPINI1 | METTL1 | 0.001833305 | 0.652133711  |
| SUCLG1   | METTL1 | 0.02562296  | 0.49748068   |
| RPL22L1  | METTL1 | 1.69E-04    | 0.743963876  |
| PPM1L    | METTL1 | 0.007784553 | -0.576593165 |
| CTLA4    | METTL1 | 6.58E-06    | 0.828010943  |
| ICOS     | METTL1 | 1.66E-04    | 0.744625562  |
| PPP4R2   | METTL1 | 0.003866744 | 0.615489565  |
| GTPBP8   | METTL1 | 0.006096452 | 0.590732918  |
| CADPS    | METTL1 | 0.024792112 | 0.499932546  |
| WDFY3    | METTL1 | 0.023949039 | -0.502487809 |
| ALB      | METTL1 | 0.008992082 | 0.567951407  |
| C4orf36  | METTL1 | 0.046469054 | 0.450049711  |
| THOC7    | METTL1 | 0.031358309 | 0.482075789  |
| GMPS     | METTL1 | 0.029100965 | 0.487851133  |
| RPL9     | METTL1 | 9.49E-04    | 0.680978175  |
| C3orf67  | METTL1 | 0.01051994  | 0.558280688  |
| RBM47    | METTL1 | 2.24E-04    | -0.73475487  |
| APBB2    | METTL1 | 0.007557312 | 0.578340444  |
| IL17RC   | METTL1 | 0.001169237 | -0.672150836 |
| CRELD1   | METTL1 | 0.003800984 | 0.616384515  |
| U2SURP   | METTL1 | 0.001906421 | 0.650323766  |
| MTMR14   | METTL1 | 0.048487737 | -0.446412671 |
| PF4      | METTL1 | 0.011094748 | -0.554937057 |
| MTHFD2L  | METTL1 | 1.00E-04    | 0.760214894  |
| RCHY1    | METTL1 | 0.036994687 | 0.468958354  |
| GYG1     | METTL1 | 0.032859202 | -0.478413717 |
| RYK      | METTL1 | 0.004843478 | 0.603489603  |
| SNRK     | METTL1 | 0.001984231 | 0.648460354  |
| PLB1     | METTL1 | 0.023392057 | -0.504215285 |
| WDR43    | METTL1 | 6.77E-06    | 0.827410257  |
| ZDHHC3   | METTL1 | 0.040343045 | -0.461887925 |
| LZTFL1   | METTL1 | 0.017608432 | 0.524419871  |
| LRRC2    | METTL1 | 0.002550268 | 0.636486861  |
| ELP6     | METTL1 | 0.049009882 | 0.445490882  |
| ZNF148   | METTL1 | 3.15E-04    | 0.723176081  |
| SMIM12   | METTL1 | 0.021871484 | 0.509103247  |
| GRIK3    | METTL1 | 0.001195925 | 0.671180239  |
| MEAF6    | METTL1 | 0.046394146 | 0.450186988  |

|          |        |             |              |
|----------|--------|-------------|--------------|
| SENP2    | METTL1 | 0.018408454 | 0.521335404  |
| RFC4     | METTL1 | 1.65E-04    | 0.744794272  |
| TKT      | METTL1 | 7.17E-04    | -0.692345019 |
| PRKCD    | METTL1 | 0.009398992 | -0.565252625 |
| SFMBT1   | METTL1 | 0.008280919 | 0.572916935  |
| GNL3     | METTL1 | 3.46E-06    | 0.840743051  |
| UVSSA    | METTL1 | 0.02243274  | -0.507268562 |
| ARHGEF3  | METTL1 | 0.03794846  | 0.466895411  |
| ZDHHC19  | METTL1 | 0.019119972 | 0.518680869  |
| EXO5     | METTL1 | 4.03E-04    | 0.714349182  |
| C1orf50  | METTL1 | 0.042808823 | 0.456966521  |
| AIMP1    | METTL1 | 8.10E-06    | 0.823664141  |
| SGMS2    | METTL1 | 0.049496766 | -0.444638097 |
| METAP1   | METTL1 | 0.009357454 | 0.565523708  |
| H2AFZ    | METTL1 | 0.017884711 | 0.523342247  |
| BDH2     | METTL1 | 1.65E-05    | 0.8078792    |
| PGRMC2   | METTL1 | 2.17E-04    | 0.735872884  |
| ZNF589   | METTL1 | 0.012960838 | 0.54496998   |
| APEH     | METTL1 | 0.047978227 | 0.44731952   |
| INTU     | METTL1 | 0.038607678 | -0.465492982 |
| DUSP7    | METTL1 | 0.001977332 | -0.648623082 |
| WDR82    | METTL1 | 0.001142736 | 0.673133257  |
| C4orf3   | METTL1 | 0.003499851 | 0.620654463  |
| NDST3    | METTL1 | 0.048369094 | 0.446623183  |
| MAD2L1   | METTL1 | 0.001736195 | 0.654633501  |
| TMEM155  | METTL1 | 0.036383469 | 0.470302207  |
| MAP9     | METTL1 | 8.65E-05    | 0.764575484  |
| FAM198B  | METTL1 | 0.023467469 | -0.503979501 |
| NAA15    | METTL1 | 1.49E-04    | 0.748147947  |
| ANAPC10  | METTL1 | 0.035928993 | 0.47131287   |
| ABCE1    | METTL1 | 7.27E-07    | 0.8676053    |
| OTUD4    | METTL1 | 0.009375002 | 0.565409067  |
| ITGA2    | METTL1 | 0.039053181 | 0.464555698  |
| MOCS2    | METTL1 | 7.24E-06    | 0.826016456  |
| ELOVL7   | METTL1 | 0.023633122 | -0.503463667 |
| NDUFAF2  | METTL1 | 0.004310264 | 0.609762406  |
| ZNF474   | METTL1 | 0.002724444 | 0.633251341  |
| SLC25A46 | METTL1 | 0.043079044 | 0.456440616  |
| WDR41    | METTL1 | 0.025753386 | -0.497101509 |
| NDUFS4   | METTL1 | 0.026274742 | 0.495600811  |
| GRPEL2   | METTL1 | 0.013278365 | 0.543391274  |
| CDC20B   | METTL1 | 0.006138686 | 0.590342032  |
| RHOBTB3  | METTL1 | 0.040302322 | -0.461971135 |
| TIGD6    | METTL1 | 0.026519756 | 0.494903655  |
| PAPD4    | METTL1 | 0.030995885 | 0.482980584  |
| EBF1     | METTL1 | 0.005239543 | 0.599189603  |
| ANKRA2   | METTL1 | 0.001959858 | 0.649037356  |
| UBLCP1   | METTL1 | 0.033982828 | 0.475756821  |
| UTP15    | METTL1 | 0.004544218 | 0.606935437  |
| NSA2     | METTL1 | 6.37E-05    | 0.773299566  |
| FOXQ1    | METTL1 | 0.008328452 | -0.572574413 |
| ACSL6    | METTL1 | 0.04024483  | 0.462088716  |
| UQCRQ    | METTL1 | 0.026566655 | 0.494770789  |
| SLC35A1  | METTL1 | 0.046087191 | -0.450751304 |

|          |        |             |              |
|----------|--------|-------------|--------------|
| CREBRF   | METTL1 | 0.018392032 | 0.521397631  |
| DCBLD1   | METTL1 | 0.035662914 | -0.471909203 |
| SFXN1    | METTL1 | 0.021041544 | 0.511885998  |
| TMEM200A | METTL1 | 0.009393628 | 0.565287574  |
| PDSS2    | METTL1 | 0.046037383 | 0.450843146  |
| IL31RA   | METTL1 | 0.009108297 | -0.56717065  |
| PI16     | METTL1 | 0.020038158 | 0.515369355  |
| KIAA0895 | METTL1 | 0.027062576 | 0.493377025  |
| STK17A   | METTL1 | 0.003686079 | 0.617979562  |
| TRA2A    | METTL1 | 1.49E-05    | 0.81015558   |
| SAP30L   | METTL1 | 0.020817567 | -0.512651911 |
| RPS14    | METTL1 | 0.004132476 | 0.611996799  |
| SLU7     | METTL1 | 0.001543536 | 0.65996147   |
| RP9      | METTL1 | 0.020579099 | 0.513474615  |
| CAMLG    | METTL1 | 6.71E-04    | 0.694979748  |
| SLC29A4  | METTL1 | 0.006851373 | -0.584057571 |
| STEAP1   | METTL1 | 0.045693208 | 0.451479866  |
| CDC47L   | METTL1 | 1.37E-04    | 0.750618098  |
| MIOS     | METTL1 | 6.14E-05    | 0.774361296  |
| HEY1     | METTL1 | 0.003210493 | 0.625055034  |
| FABP5    | METTL1 | 0.020889199 | 0.512406247  |
| TAGAP    | METTL1 | 4.51E-05    | 0.782748351  |
| BRI3     | METTL1 | 1.76E-04    | -0.74266545  |
| SLC35G3  | METTL1 | 0.031079025 | 0.482772295  |
| CTSB     | METTL1 | 0.012179089 | -0.5489942   |
| PEX2     | METTL1 | 0.018198058 | 0.522136033  |
| RAD21    | METTL1 | 1.31E-04    | 0.752001333  |
| MED30    | METTL1 | 0.039705281 | 0.463198595  |
| ORC5     | METTL1 | 1.45E-04    | 0.748815415  |
| DEFB1    | METTL1 | 0.003930731 | 0.614630778  |
| MICALL2  | METTL1 | 4.42E-04    | -0.710923108 |
| SLC4A2   | METTL1 | 0.030318504 | -0.484694144 |
| PHAX     | METTL1 | 0.001804551 | 0.652862107  |
| ALDH7A1  | METTL1 | 4.27E-04    | 0.712166925  |
| COX6C    | METTL1 | 1.44E-04    | 0.749176103  |
| SLC25A32 | METTL1 | 0.003481089 | 0.620930452  |
| DCAF13   | METTL1 | 0.002206719 | 0.643450353  |
| GEM      | METTL1 | 9.92E-04    | 0.679128438  |
| TMEM67   | METTL1 | 0.009854401 | 0.562342672  |
| NUDT2    | METTL1 | 0.004552822 | 0.606833789  |
| PSIP1    | METTL1 | 4.19E-04    | 0.712872609  |
| UBAP1    | METTL1 | 0.019496447 | 0.517308069  |
| DIRAS2   | METTL1 | 0.007377632 | 0.579752705  |
| SYK      | METTL1 | 0.029067734 | -0.487938742 |
| LETM2    | METTL1 | 0.021743514 | 0.509526792  |
| PRKACG   | METTL1 | 0.021635097 | 0.509887174  |
| C8orf34  | METTL1 | 0.033469381 | 0.476962256  |
| KDM1B    | METTL1 | 0.013795219 | -0.540885473 |
| HGSNAT   | METTL1 | 0.010357183 | -0.559254332 |
| GKAP1    | METTL1 | 0.004602981 | 0.606244331  |
| HNRNPK   | METTL1 | 1.82E-04    | 0.741659121  |
| ANKS6    | METTL1 | 0.035796743 | 0.471608836  |
| FBP1     | METTL1 | 0.012917932 | -0.545185694 |
| CYBB     | METTL1 | 0.019848312 | -0.51604398  |



|          |        |             |              |
|----------|--------|-------------|--------------|
| DYNLT3   | METTL1 | 9.41E-05    | 0.762084111  |
| NCF1C    | METTL1 | 0.011407607 | -0.553175806 |
| PIGA     | METTL1 | 0.017935752 | 0.523144622  |
| STRBP    | METTL1 | 1.43E-04    | 0.749281395  |
| NDUFB6   | METTL1 | 0.00804706  | 0.57462587   |
| NOL6     | METTL1 | 0.003444624 | 0.621470411  |
| AQP3     | METTL1 | 0.00941108  | 0.565173916  |
| STOML2   | METTL1 | 0.032899427 | 0.478317387  |
| ARHGAP12 | METTL1 | 0.038019564 | 0.466743239  |
| HECTD2   | METTL1 | 0.007152031 | 0.581566318  |
| SLC7A3   | METTL1 | 0.049810255 | 0.444092411  |
| CLDN2    | METTL1 | 0.022193507 | 0.508046084  |
| WRN      | METTL1 | 0.033077242 | 0.477892656  |
| CFL2     | METTL1 | 0.012916194 | 0.545194444  |
| ZCCHC24  | METTL1 | 0.001791354 | -0.653199644 |
| PGM2L1   | METTL1 | 8.75E-04    | 0.684317281  |
| INPPL1   | METTL1 | 1.48E-04    | -0.748317962 |
| GJB2     | METTL1 | 3.93E-04    | 0.715182787  |
| REEP3    | METTL1 | 0.005118447 | -0.600475025 |
| MICU2    | METTL1 | 0.001089362 | 0.675171618  |
| PCF11    | METTL1 | 0.001557348 | 0.659561431  |
| RPL36AL  | METTL1 | 0.005898202 | 0.592598064  |
| C10orf10 | METTL1 | 0.02566171  | -0.497367868 |
| C10orf25 | METTL1 | 0.008009054 | -0.574907415 |
| ZNF22    | METTL1 | 2.04E-05    | 0.802818215  |
| KLHDC2   | METTL1 | 0.020946993 | 0.512208529  |
| NEMF     | METTL1 | 0.021923962 | 0.50893013   |
| RPUSD4   | METTL1 | 0.010523653 | 0.558258617  |
| FAAH2    | METTL1 | 3.10E-05    | 0.792533058  |
| NUDT5    | METTL1 | 0.01816131  | 0.522276629  |
| PRPF18   | METTL1 | 9.55E-04    | 0.680712626  |
| TAF3     | METTL1 | 0.028908378 | 0.488359955  |
| ZNF503   | METTL1 | 0.045770148 | -0.451337209 |
| QSOX2    | METTL1 | 0.015968437 | 0.531111101  |
| CLEC1B   | METTL1 | 0.005880327 | -0.59276876  |
| HPRT1    | METTL1 | 0.00277519  | 0.632341138  |
| DDX21    | METTL1 | 0.003303187 | 0.623610697  |
| BMS1     | METTL1 | 0.009740878 | 0.56305765   |
| STK32C   | METTL1 | 0.025610011 | -0.497518408 |
| FUNDC2   | METTL1 | 0.00357285  | 0.619592187  |
| TMEM55B  | METTL1 | 0.006628277 | 0.585964717  |
| METTL17  | METTL1 | 0.003331347 | 0.623178586  |
| ARHGEF40 | METTL1 | 3.10E-04    | -0.723703238 |
| PPP1R36  | METTL1 | 0.002528328 | 0.636907393  |
| TRUB1    | METTL1 | 0.003394353 | 0.62222264   |
| UBTD1    | METTL1 | 4.36E-05    | -0.783675882 |
| ISCA2    | METTL1 | 0.014098457 | 0.539450335  |
| TTC7B    | METTL1 | 0.037966676 | -0.466856405 |
| AGBL2    | METTL1 | 0.006110465 | 0.590602983  |
| MOAP1    | METTL1 | 0.004806019 | 0.603911133  |
| CLMN     | METTL1 | 0.037432576 | -0.468006163 |
| PDZRN4   | METTL1 | 0.014503336 | 0.537572414  |
| PTER     | METTL1 | 0.039856154 | 0.46288707   |
| ARL5B    | METTL1 | 0.009416541 | 0.565138383  |

|            |        |             |              |
|------------|--------|-------------|--------------|
| TAF1D      | METTL1 | 1.74E-07    | 0.888012394  |
| ABTB2      | METTL1 | 0.021165947 | -0.511463386 |
| R3HCC1L    | METTL1 | 0.015653802 | 0.532457201  |
| HTRA1      | METTL1 | 0.039622896 | -0.46336909  |
| CMTM5      | METTL1 | 0.032481003 | -0.479323961 |
| SVOP       | METTL1 | 0.024511103 | 0.500776512  |
| NDUFB8     | METTL1 | 1.36E-05    | 0.8122883    |
| SPINT1     | METTL1 | 0.02370033  | -0.503255203 |
| DEPDC4     | METTL1 | 0.00475616  | 0.604476429  |
| BRD7       | METTL1 | 0.020511987 | 0.513707518  |
| BAG5       | METTL1 | 0.014897909 | 0.535782449  |
| API5       | METTL1 | 0.037188485 | 0.468535865  |
| ZNF319     | METTL1 | 0.012257108 | -0.548583353 |
| NOLC1      | METTL1 | 2.25E-04    | 0.734636606  |
| COPS2      | METTL1 | 0.001440105 | 0.663056404  |
| FRS2       | METTL1 | 0.003389413 | 0.622297053  |
| CCT2       | METTL1 | 6.25E-05    | 0.773841571  |
| PCBD1      | METTL1 | 0.022705162 | -0.506391148 |
| ARIH1      | METTL1 | 0.02370246  | 0.503248604  |
| COX11      | METTL1 | 1.91E-04    | 0.740093901  |
| ZNF202     | METTL1 | 0.001383803 | 0.664820479  |
| FAM227B    | METTL1 | 0.029178461 | 0.487647134  |
| CYYR1      | METTL1 | 0.037729842 | -0.467364678 |
| WBP1L      | METTL1 | 0.020599941 | -0.51340241  |
| ANAPC16    | METTL1 | 7.90E-06    | 0.82419613   |
| SYNPO2L    | METTL1 | 7.25E-04    | 0.691911184  |
| TAF10      | METTL1 | 0.029347056 | -0.487204787 |
| TPP1       | METTL1 | 0.035972936 | -0.471214716 |
| CYB5A      | METTL1 | 0.002071183 | 0.646449023  |
| KIAA0355   | METTL1 | 0.018260773 | 0.521896612  |
| RIC3       | METTL1 | 0.018682748 | 0.520302522  |
| ZMAT1      | METTL1 | 0.021749912 | 0.509505572  |
| RNF169     | METTL1 | 0.007216342 | -0.581044603 |
| RPL27A     | METTL1 | 2.54E-04    | 0.73054679   |
| TMEM130    | METTL1 | 0.036117533 | 0.470892394  |
| MAPK7      | METTL1 | 0.006826301 | -0.584269339 |
| MCM7       | METTL1 | 0.001163216 | 0.672372379  |
| CCDC68     | METTL1 | 4.59E-04    | 0.709477511  |
| ZNF3       | METTL1 | 0.032095856 | 0.480259487  |
| RIMKLB     | METTL1 | 0.022047027 | 0.508525439  |
| TK2        | METTL1 | 0.014972158 | -0.535449895 |
| TMEM135    | METTL1 | 0.01207836  | 0.549527789  |
| FAM96B     | METTL1 | 0.004051936 | 0.613035291  |
| CHRFAM7A   | METTL1 | 0.030598738 | -0.483981638 |
| ATF7IP2    | METTL1 | 6.51E-05    | 0.772713291  |
| ZCCHC18    | METTL1 | 0.032171263 | 0.480075633  |
| ZNF667-AS1 | METTL1 | 0.018875931 | 0.519582316  |
| YPEL4      | METTL1 | 0.048765381 | 0.445921579  |
| PPIB       | METTL1 | 0.043636977 | 0.455362767  |
| TMEM170A   | METTL1 | 0.013335705 | 0.543109445  |
| TERF2IP    | METTL1 | 6.75E-04    | 0.694771916  |
| GPR182     | METTL1 | 0.031065611 | -0.482805871 |
| MTMR10     | METTL1 | 0.031178737 | 0.482523064  |
| MIR202HG   | METTL1 | 0.006921124 | 0.583471754  |

|          |        |             |              |
|----------|--------|-------------|--------------|
| C15orf48 | METTL1 | 3.69E-04    | 0.717472719  |
| TSC22D4  | METTL1 | 0.007731537 | -0.576997044 |
| MS4A14   | METTL1 | 0.028944255 | -0.488264966 |
| CCNDBP1  | METTL1 | 0.046025229 | 0.450865567  |
| MBD6     | METTL1 | 0.005079171 | -0.60089731  |
| NUDT21   | METTL1 | 0.046790953 | 0.449461723  |
| NKX3-1   | METTL1 | 0.034954708 | 0.473513484  |
| DUSP18   | METTL1 | 0.030093137 | -0.485270904 |
| PHB      | METTL1 | 0.01500887  | 0.535285952  |
| SNRPD1   | METTL1 | 3.10E-05    | 0.792505664  |
| URM1     | METTL1 | 0.041298761 | -0.459953538 |
| ENDOG    | METTL1 | 0.005374018 | -0.597790532 |
| C15orf39 | METTL1 | 0.008585002 | -0.570752783 |
| ISLR2    | METTL1 | 0.003732743 | 0.617326894  |
| COQ7     | METTL1 | 0.035553846 | 0.472154645  |
| GPRC5B   | METTL1 | 0.03935913  | 0.463916809  |
| CRK      | METTL1 | 0.041032786 | -0.460488371 |
| C16orf92 | METTL1 | 0.026293732 | 0.495546597  |
| NOD2     | METTL1 | 0.035709038 | -0.471805583 |
| POP5     | METTL1 | 5.78E-04    | 0.700795937  |
| ATP5L    | METTL1 | 0.009346777 | 0.565593549  |
| CD3D     | METTL1 | 0.002644053 | 0.634722601  |
| STIM1    | METTL1 | 0.032828035 | 0.478488419  |
| ZNF180   | METTL1 | 6.15E-05    | 0.774316106  |
| ZNF668   | METTL1 | 1.20E-04    | -0.754875699 |
| VKORC1   | METTL1 | 0.033907282 | 0.475933289  |
| SMG8     | METTL1 | 7.95E-04    | 0.688220542  |
| MIDN     | METTL1 | 0.005042167 | -0.601297652 |
| FAM129C  | METTL1 | 0.01764539  | 0.524274934  |
| TRAPPC2L | METTL1 | 6.85E-04    | 0.694153353  |
| TP53I13  | METTL1 | 0.04065143  | -0.46125991  |
| CORO6    | METTL1 | 0.039130894 | -0.464393049 |
| ZNF610   | METTL1 | 0.003971795 | 0.614085724  |
| ZNF701   | METTL1 | 0.048336742 | 0.446680654  |
| SERTAD3  | METTL1 | 0.00276115  | -0.632591563 |
| NCKAP5L  | METTL1 | 0.004156454 | -0.611690868 |
| CYP2S1   | METTL1 | 0.026574066 | -0.49474981  |
| TMC4     | METTL1 | 0.037260364 | -0.4683796   |
| ZNF146   | METTL1 | 0.037566662 | 0.467716324  |
| PPP1R14A | METTL1 | 0.006396865 | 0.587999412  |
| YIF1B    | METTL1 | 0.001428492 | -0.663415479 |
| GLOD4    | METTL1 | 0.004370643 | 0.609020897  |
| SLC43A2  | METTL1 | 4.45E-04    | -0.710634378 |
| RILP     | METTL1 | 3.56E-04    | -0.718771542 |
| TSR1     | METTL1 | 6.15E-05    | 0.77428249   |
| C19orf48 | METTL1 | 0.002895642 | 0.630234909  |
| KLK2     | METTL1 | 3.02E-04    | 0.724649926  |
| KLK11    | METTL1 | 0.046853568 | 0.449347711  |
| ZNF558   | METTL1 | 0.003558656 | 0.619797316  |
| PRDX2    | METTL1 | 6.98E-05    | 0.770722202  |
| ZNF232   | METTL1 | 0.004999463 | 0.601762679  |
| MIS12    | METTL1 | 3.39E-05    | 0.790224165  |
| CD300C   | METTL1 | 0.002585105 | -0.635825298 |
| CD300A   | METTL1 | 0.040637848 | -0.461287492 |

|           |        |             |              |
|-----------|--------|-------------|--------------|
| TEKT1     | METTL1 | 0.001960895 | 0.649012701  |
| ATP5H     | METTL1 | 0.008241884 | 0.573199421  |
| EVPL      | METTL1 | 0.041910367 | 0.458733732  |
| GHDC      | METTL1 | 0.002848949 | -0.631042574 |
| ZNF598    | METTL1 | 0.007543198 | -0.578450379 |
| DNASE1L2  | METTL1 | 0.03130688  | -0.482203681 |
| ECI1      | METTL1 | 0.021182199 | -0.511408321 |
| ZNF597    | METTL1 | 0.015168926 | 0.53457495   |
| VPS37C    | METTL1 | 0.024921997 | -0.499545011 |
| FTH1      | METTL1 | 0.007073673 | -0.582207197 |
| ATG16L2   | METTL1 | 0.00374672  | -0.617132717 |
| TRANK1    | METTL1 | 0.0131224   | 0.544162866  |
| RPSA      | METTL1 | 1.34E-05    | 0.812700003  |
| FADD      | METTL1 | 0.03379254  | -0.476201898 |
| PNOC      | METTL1 | 3.25E-04    | 0.722033303  |
| COPS6     | METTL1 | 0.009198573 | 0.566569732  |
| KIAA1586  | METTL1 | 2.92E-04    | 0.725764341  |
| THAP9     | METTL1 | 2.30E-06    | 0.848268621  |
| HOOK3     | METTL1 | 0.03949282  | -0.463638844 |
| MAPK1IP1L | METTL1 | 5.19E-04    | 0.70493579   |
| RBPJ      | METTL1 | 0.006721738 | -0.585159451 |
| ZCCHC4    | METTL1 | 0.039235439 | 0.464174638  |
| PTGDR     | METTL1 | 0.046383523 | -0.45020647  |
| TTC39C    | METTL1 | 0.008579456 | 0.570791694  |
| NKIRAS2   | METTL1 | 8.58E-04    | -0.68514253  |
| SMIM4     | METTL1 | 0.00536783  | 0.597854281  |
| HIST1H2AE | METTL1 | 0.026547637 | -0.494824644 |
| KIF5C     | METTL1 | 0.04401979  | 0.454629357  |
| BMI1      | METTL1 | 0.002700049 | 0.633693933  |
| MMADHC    | METTL1 | 1.91E-04    | 0.74002949   |
| MFSD2A    | METTL1 | 0.022112716 | -0.508310161 |
| RFWD3     | METTL1 | 3.96E-04    | 0.714971644  |
| RHOH      | METTL1 | 7.77E-07    | 0.866554487  |
| CDC40     | METTL1 | 0.01986659  | 0.515978807  |
| RAB31     | METTL1 | 0.001883365 | -0.650888131 |
| REEP4     | METTL1 | 8.42E-05    | -0.765369868 |
| BMP1      | METTL1 | 0.004439064 | -0.608190809 |
| FEN1      | METTL1 | 0.006574026 | 0.586436427  |
| SERINC2   | METTL1 | 0.007251638 | -0.580759882 |
| CDKN2AIP  | METTL1 | 4.25E-04    | 0.712393203  |
| SNRNP48   | METTL1 | 0.026354137 | 0.495374344  |
| ADAM9     | METTL1 | 0.031496288 | -0.481733473 |
| NDUFS5    | METTL1 | 6.83E-04    | 0.694301552  |
| ZNF30     | METTL1 | 0.004289321 | 0.610021606  |
| FAM84B    | METTL1 | 0.001190899 | 0.671361621  |
| LDLRAD4   | METTL1 | 0.008324966 | 0.572599477  |
| IL7R      | METTL1 | 0.004280233 | 0.610134411  |
| DNAJC21   | METTL1 | 1.71E-04    | 0.743614324  |
| CA7       | METTL1 | 0.025372768 | -0.498212314 |
| GSTM4     | METTL1 | 0.012733934 | 0.546117352  |
| TET2      | METTL1 | 0.022211504 | -0.507987359 |
| ZBTB5     | METTL1 | 1.17E-04    | 0.755506078  |
| CHTF8     | METTL1 | 0.016035152 | 0.530828306  |
| LCMT2     | METTL1 | 0.006253684 | 0.589288787  |

|          |        |             |              |
|----------|--------|-------------|--------------|
| ZNF507   | METTL1 | 0.001930464 | 0.649741289  |
| DDX19A   | METTL1 | 0.022462996 | 0.507170698  |
| ANKRD49  | METTL1 | 0.001406177 | 0.664112352  |
| TMEM150A | METTL1 | 0.034733885 | -0.474018887 |
| ZNF608   | METTL1 | 0.001805753 | 0.652831452  |
| CEP120   | METTL1 | 2.14E-04    | 0.736293275  |
| MFF      | METTL1 | 0.018943526 | 0.519331707  |
| SIGLEC7  | METTL1 | 0.004079229 | -0.612681476 |
| ATP5I    | METTL1 | 0.016339688 | 0.529549685  |
| MFSD7    | METTL1 | 0.002170762 | -0.644230547 |
| KLK7     | METTL1 | 2.41E-04    | 0.732350676  |
| CHST14   | METTL1 | 0.025411015 | -0.498100102 |
| CSNK1G1  | METTL1 | 0.023762195 | 0.503063725  |
| CPT1C    | METTL1 | 0.001375273 | 0.665092956  |
| XPO6     | METTL1 | 0.039065114 | 0.464530706  |
| NSMCE1   | METTL1 | 1.26E-04    | 0.753269416  |
| RAB3B    | METTL1 | 0.032153894 | 0.480117952  |
| TBC1D10B | METTL1 | 0.009085838 | -0.567320897 |
| PRELID1  | METTL1 | 0.013654774 | -0.541558783 |
| SLC50A1  | METTL1 | 2.39E-05    | 0.799025622  |
| NMD3     | METTL1 | 0.005126966 | 0.600383774  |
| ADRB2    | METTL1 | 0.014994204 | -0.535351406 |
| MRPL1    | METTL1 | 5.92E-04    | 0.699871247  |
| P2RY12   | METTL1 | 0.007763208 | -0.576755497 |
| PDILT    | METTL1 | 0.002975828 | 0.628872848  |
| GP2      | METTL1 | 2.41E-04    | 0.732350823  |
| SIN3A    | METTL1 | 0.004494073 | 0.607531063  |
| PTAFR    | METTL1 | 0.014309073 | -0.538468114 |
| RNASE6   | METTL1 | 0.047328331 | -0.448487022 |
| CD52     | METTL1 | 3.89E-05    | 0.786678818  |
| GPR183   | METTL1 | 1.67E-05    | 0.807575279  |
| CCDC8    | METTL1 | 0.001921627 | 0.649954666  |
| METTL15  | METTL1 | 0.026438075 | 0.4951355    |
| ZEB2     | METTL1 | 0.006202493 | -0.589755655 |
| GJB1     | METTL1 | 0.001373709 | 0.665143095  |
| HINT1    | METTL1 | 3.25E-06    | 0.841898504  |
| C15orf40 | METTL1 | 0.00339921  | 0.622149557  |
| FAM103A1 | METTL1 | 9.50E-06    | 0.820238435  |
| PROKR1   | METTL1 | 0.029581908 | 0.486591918  |
| APLF     | METTL1 | 0.027725122 | 0.491546031  |
| BCRP2    | METTL1 | 0.010615755 | 0.557713209  |
| CHRNA5   | METTL1 | 0.030176405 | 0.48505741   |
| AGPAT2   | METTL1 | 6.25E-04    | -0.697782152 |
| GP9      | METTL1 | 0.018215056 | -0.522071077 |
| CNBP     | METTL1 | 0.011774592 | 0.551159031  |
| ZNF32    | METTL1 | 3.67E-05    | 0.788200627  |
| LIMS1    | METTL1 | 0.030053758 | -0.48537203  |
| TAPT1    | METTL1 | 4.64E-04    | 0.709123042  |
| UGP2     | METTL1 | 0.0099893   | 0.561501712  |
| ROBO1    | METTL1 | 0.045733034 | 0.451406001  |
| AVEN     | METTL1 | 0.025872927 | 0.496755312  |
| P2RY1    | METTL1 | 0.007207343 | -0.581117375 |
| AHSP     | METTL1 | 0.044046856 | 0.454577688  |
| ITGAM    | METTL1 | 0.00680212  | -0.584474186 |

|          |        |             |              |
|----------|--------|-------------|--------------|
| GUSB     | METTL1 | 0.028902216 | -0.48837628  |
| KLF13    | METTL1 | 0.006046835 | -0.591194995 |
| TMEM42   | METTL1 | 0.012808815 | 0.545736898  |
| SF3B5    | METTL1 | 0.001568569 | 0.65923864   |
| UBE2E3   | METTL1 | 0.008581506 | -0.570777306 |
| TRAPPC1  | METTL1 | 0.021109844 | 0.511653728  |
| SIMC1    | METTL1 | 0.016645303 | 0.528285597  |
| NIPA1    | METTL1 | 0.001322837 | 0.666800048  |
| HNRNPA3  | METTL1 | 0.003379923 | 0.622440262  |
| USP38    | METTL1 | 0.047867138 | 0.447518222  |
| SLC16A5  | METTL1 | 0.001779965 | -0.653492641 |
| NANP     | METTL1 | 0.003879362 | -0.615319286 |
| ANKK1    | METTL1 | 0.034625434 | 0.474268019  |
| ADPRM    | METTL1 | 1.82E-05    | 0.805491543  |
| USP47    | METTL1 | 0.006976318 | 0.583011609  |
| FAXDC2   | METTL1 | 0.023695465 | -0.503270277 |
| CRTAP    | METTL1 | 0.00466738  | -0.605495246 |
| ELP5     | METTL1 | 3.39E-04    | 0.720579976  |
| UBB      | METTL1 | 5.56E-05    | 0.777063392  |
| NFRKB    | METTL1 | 0.007439936 | 0.579259845  |
| FRMPD2   | METTL1 | 0.015113386 | 0.534820984  |
| FOS      | METTL1 | 0.030835778 | -0.483382936 |
| OR2A20P  | METTL1 | 0.012440823 | 0.547624207  |
| SETMAR   | METTL1 | 2.81E-07    | 0.881579709  |
| SLC30A1  | METTL1 | 0.01145174  | -0.552930515 |
| ZNF804A  | METTL1 | 5.14E-04    | -0.705270077 |
| TMEM182  | METTL1 | 0.003335311 | 0.623117999  |
| MGMT     | METTL1 | 0.012225483 | 0.548749636  |
| HARS     | METTL1 | 0.024166075 | 0.501823279  |
| DENND5B  | METTL1 | 0.001644825 | 0.657094957  |
| CD14     | METTL1 | 0.013924613 | -0.54027001  |
| DNAJC18  | METTL1 | 3.03E-06    | 0.843212373  |
| SPATA24  | METTL1 | 2.62E-04    | 0.729542352  |
| PA2G4    | METTL1 | 0.046821086 | 0.44940684   |
| TMC7     | METTL1 | 0.003592205 | 0.619313559  |
| NUDCD2   | METTL1 | 4.76E-05    | 0.781304744  |
| HSPA4    | METTL1 | 0.003676983 | 0.61810757   |
| GTSF1    | METTL1 | 5.78E-05    | 0.776008088  |
| ACYP2    | METTL1 | 5.12E-06    | 0.833109833  |
| TRABD    | METTL1 | 0.011843937 | -0.550783671 |
| TMEM133  | METTL1 | 0.006289382 | 0.588965068  |
| ZNF296   | METTL1 | 0.026949626 | -0.493692684 |
| KCNS3    | METTL1 | 1.66E-04    | 0.744695651  |
| CHCHD7   | METTL1 | 1.79E-05    | 0.805864935  |
| KBTBD2   | METTL1 | 0.001227198 | 0.670065817  |
| TRIAP1   | METTL1 | 7.60E-04    | 0.69005719   |
| LSM3     | METTL1 | 7.99E-04    | 0.688038492  |
| KIAA0232 | METTL1 | 0.026653194 | -0.494526105 |
| RPS9     | METTL1 | 0.003168916 | 0.625714163  |
| TSEN34   | METTL1 | 0.009935766 | -0.56183433  |
| NDUFA3   | METTL1 | 0.009428992 | 0.56505744   |
| OSCAR    | METTL1 | 7.16E-04    | -0.692415398 |
| ZNF415   | METTL1 | 0.027124758 | 0.493203688  |
| PDGFD    | METTL1 | 0.027855463 | -0.491189885 |

|            |        |             |              |
|------------|--------|-------------|--------------|
| S1PR1      | METTL1 | 0.005274444 | 0.598823671  |
| C8orf74    | METTL1 | 0.027272434 | 0.492793283  |
| FAM86JP    | METTL1 | 0.001990279 | 0.648318093  |
| MTM1       | METTL1 | 2.50E-04    | 0.731096979  |
| SIGLEC17P  | METTL1 | 0.008586654 | -0.570741202 |
| TRMT61B    | METTL1 | 0.036030973 | 0.471085225  |
| INSR       | METTL1 | 0.012904406 | -0.545253813 |
| JAGN1      | METTL1 | 1.25E-04    | 0.753539585  |
| C9orf16    | METTL1 | 0.010614382 | -0.557721313 |
| RBKS       | METTL1 | 2.91E-04    | 0.725859127  |
| TMEM126A   | METTL1 | 0.002553184 | 0.636431208  |
| TMEM126B   | METTL1 | 0.020296604 | 0.514459088  |
| TRIM8      | METTL1 | 6.76E-05    | -0.771634878 |
| SCAND1     | METTL1 | 0.035729545 | -0.471759545 |
| C10orf35   | METTL1 | 0.015774276 | 0.531939201  |
| GAA        | METTL1 | 0.003589705 | -0.619349475 |
| CHD7       | METTL1 | 0.001014618 | 0.678172471  |
| KRT15      | METTL1 | 0.001150676 | 0.672836911  |
| LURAP1     | METTL1 | 0.037659037 | 0.467517115  |
| KRT38      | METTL1 | 0.030467664 | 0.484314259  |
| KCND3      | METTL1 | 0.032115653 | -0.480211185 |
| XAGE5      | METTL1 | 1.97E-04    | 0.739023868  |
| PDE7B      | METTL1 | 0.046166138 | 0.450605891  |
| ZNF524     | METTL1 | 5.49E-04    | -0.702777536 |
| ZBTB26     | METTL1 | 0.006242748 | 0.589388261  |
| POLR1C     | METTL1 | 6.39E-04    | 0.696888381  |
| ASXL1      | METTL1 | 0.002643593 | 0.634731131  |
| LRRC8C     | METTL1 | 0.004609736 | 0.606165351  |
| RSL1D1     | METTL1 | 0.003298491 | 0.623683054  |
| PTGER4     | METTL1 | 0.008616487 | 0.570532298  |
| TBCA       | METTL1 | 2.63E-04    | 0.729381186  |
| PLRG1      | METTL1 | 0.025355456 | 0.498263149  |
| NMUR1      | METTL1 | 0.035464182 | -0.472356862 |
| ZNF274     | METTL1 | 1.62E-05    | 0.808276708  |
| PTCRA      | METTL1 | 0.005491468 | -0.596591989 |
| S100Z      | METTL1 | 0.014952624 | -0.535537256 |
| ZIK1       | METTL1 | 0.006360867 | 0.588321337  |
| SHANK2-AS3 | METTL1 | 2.60E-04    | 0.729841416  |
| ATF7IP     | METTL1 | 0.008482419 | 0.571475771  |
| RGS19      | METTL1 | 0.002598725 | -0.63556867  |
| HDAC3      | METTL1 | 0.045492925 | 0.451852089  |
| GPHN       | METTL1 | 0.010237581 | 0.559977763  |
| TMEM51     | METTL1 | 0.029009559 | -0.488092301 |
| LGALS4     | METTL1 | 2.69E-05    | 0.79603473   |
| NXNL1      | METTL1 | 1.97E-04    | 0.739023868  |
| RASGRP4    | METTL1 | 8.74E-04    | -0.684360364 |
| BCL2       | METTL1 | 4.77E-04    | 0.708087591  |
| RHNO1      | METTL1 | 4.41E-07    | 0.875167506  |
| CTPS1      | METTL1 | 0.009280514 | 0.566028435  |
| UTF1       | METTL1 | 0.019942461 | -0.515708778 |
| METTL18    | METTL1 | 5.69E-06    | 0.830980568  |
| COL8A2     | METTL1 | 0.021884227 | -0.509061179 |
| PWWP2B     | METTL1 | 0.038597206 | -0.465515115 |
| FBXL14     | METTL1 | 0.039996294 | -0.462598525 |

|           |        |             |              |
|-----------|--------|-------------|--------------|
| MLLT3     | METTL1 | 1.08E-04    | 0.758112583  |
| RPS21     | METTL1 | 2.36E-04    | 0.733128913  |
| RPS7      | METTL1 | 2.88E-04    | 0.726200869  |
| PRND      | METTL1 | 0.041653237 | 0.459244873  |
| RNASEH1   | METTL1 | 4.76E-04    | 0.708152094  |
| PRNP      | METTL1 | 0.041601643 | 0.459347729  |
| LGALS9C   | METTL1 | 0.02780808  | -0.491319203 |
| TVP23B    | METTL1 | 0.019903029 | 0.515849015  |
| PPIH      | METTL1 | 2.49E-05    | 0.798011265  |
| C20orf196 | METTL1 | 9.00E-05    | 0.763409606  |
| MAL       | METTL1 | 0.015861054 | 0.531568047  |
| LAMB2     | METTL1 | 0.003167073 | -0.625743558 |
| ORMDL3    | METTL1 | 8.96E-05    | 0.763523823  |
| EIF2AK3   | METTL1 | 5.53E-06    | 0.831544668  |
| MOB3A     | METTL1 | 0.003736787 | -0.617270647 |
| CYCS      | METTL1 | 9.87E-06    | 0.819406528  |
| FRMD3     | METTL1 | 0.023562236 | -0.503684052 |
| MTBP      | METTL1 | 0.003797091 | 0.616437897  |
| MALT1     | METTL1 | 1.11E-06    | 0.860884824  |
| ISG20     | METTL1 | 1.05E-04    | 0.758795546  |
| CEBPB     | METTL1 | 2.37E-04    | -0.732945394 |
| PAIP1     | METTL1 | 0.0025298   | 0.636879093  |
| CLEC7A    | METTL1 | 0.012107518 | -0.54937296  |
| C5orf34   | METTL1 | 0.045794759 | 0.451291616  |
| C1QTNF4   | METTL1 | 0.04887975  | -0.445719908 |
| ZNF131    | METTL1 | 0.002287564 | 0.641734258  |
| MACROD2   | METTL1 | 1.75E-05    | 0.806496424  |
| CLEC12A   | METTL1 | 0.026635862 | -0.49457506  |
| ALG14     | METTL1 | 0.017445681 | 0.525061022  |
| SUCLG2    | METTL1 | 0.002033774 | 0.647305526  |
| CSDC2     | METTL1 | 0.043567805 | -0.455495819 |
| GNB2      | METTL1 | 8.68E-05    | -0.764451387 |
| PDZD3     | METTL1 | 0.011297231 | -0.553792656 |
| C2CD2L    | METTL1 | 0.015248564 | -0.534223427 |
| ZNF24     | METTL1 | 3.77E-04    | 0.716726822  |
| NIPAL4    | METTL1 | 0.001994352 | 0.648222487  |
| RASGRP1   | METTL1 | 0.022388533 | 0.507411739  |
| KLHL6     | METTL1 | 0.02054872  | 0.513579964  |
| CHCHD1    | METTL1 | 0.039331398 | 0.46397456   |
| MRPL52    | METTL1 | 0.009726924 | 0.563146003  |
| RND1      | METTL1 | 1.49E-04    | 0.747972379  |
| TAF15     | METTL1 | 1.30E-06    | 0.858180384  |
| THEMIS    | METTL1 | 0.012333069 | 0.548185378  |
| FAM71D    | METTL1 | 0.021503268 | 0.510327317  |
| CORO1B    | METTL1 | 4.11E-04    | -0.713630691 |
| EFCAB12   | METTL1 | 0.023341312 | 0.504374283  |
| RAB43     | METTL1 | 0.020697993 | -0.513063494 |
| FADS6     | METTL1 | 0.020569522 | 0.513507813  |
| RPL38     | METTL1 | 2.73E-05    | 0.795742558  |
| CES3      | METTL1 | 0.020272971 | 0.514541939  |
| SSH3      | METTL1 | 0.047983252 | -0.447310541 |
| DMXL1     | METTL1 | 0.005198276 | 0.599624868  |
| NBEA      | METTL1 | 0.016444519 | 0.529113962  |
| ANKRD13D  | METTL1 | 0.017456556 | -0.52501803  |



|          |        |             |              |
|----------|--------|-------------|--------------|
| FRG2C    | METTL1 | 4.71E-05    | 0.781595256  |
| KAT5     | METTL1 | 0.013782512 | 0.540946162  |
| TADA2B   | METTL1 | 0.024718153 | 0.500153934  |
| CCDC96   | METTL1 | 0.023594463 | 0.503583794  |
| COQ2     | METTL1 | 0.005577589 | -0.595726488 |
| TRMT112  | METTL1 | 0.011422875 | 0.55309086   |
| NOC3L    | METTL1 | 0.030322594 | 0.484683707  |
| ESRRA    | METTL1 | 4.43E-04    | -0.710860827 |
| RHOD     | METTL1 | 0.00510653  | 0.600602873  |
| CKS1B    | METTL1 | 0.038902887 | 0.464870967  |
| MAB21L3  | METTL1 | 0.007940348 | 0.575419176  |
| IQCB1    | METTL1 | 1.07E-04    | 0.758173634  |
| SYT12    | METTL1 | 7.22E-04    | 0.692068307  |
| ZNF483   | METTL1 | 0.016509956 | 0.528843105  |
| ZBTB21   | METTL1 | 0.001163894 | 0.672347376  |
| MAP3K11  | METTL1 | 0.003575658 | -0.619551687 |
| TRIB1    | METTL1 | 0.029045165 | -0.487998288 |
| DAB1     | METTL1 | 0.00355656  | 0.61982766   |
| MINOS1   | METTL1 | 0.003835509 | 0.615913073  |
| EHBP1L1  | METTL1 | 3.69E-04    | -0.717465361 |
| THAP2    | METTL1 | 9.89E-04    | 0.679244248  |
| RNF26    | METTL1 | 0.006890178 | 0.583731063  |
| SMARCC1  | METTL1 | 0.002031656 | 0.647354398  |
| LTA      | METTL1 | 0.013141824 | 0.544066368  |
| GMPPB    | METTL1 | 0.004500606 | 0.607453149  |
| SNX33    | METTL1 | 0.013356447 | -0.543007733 |
| CHD2     | METTL1 | 0.006766332 | 0.584778461  |
| LRFN4    | METTL1 | 0.012815668 | -0.545702167 |
| SLC19A1  | METTL1 | 0.017305267 | -0.525618033 |
| HSPB7    | METTL1 | 0.043392441 | -0.45583386  |
| UQCRH    | METTL1 | 0.006731837 | 0.585072988  |
| EIF1AX   | METTL1 | 1.39E-04    | 0.750220006  |
| C11orf80 | METTL1 | 0.002865796 | 0.630749894  |
| TOMM20   | METTL1 | 4.35E-04    | 0.711528795  |
| EIF1     | METTL1 | 0.029951364 | 0.485635469  |
| NET1     | METTL1 | 0.036806036 | 0.469371277  |
| GOLIM4   | METTL1 | 0.023511394 | -0.503842441 |
| USMG5    | METTL1 | 0.002455846 | 0.638318631  |
| C1QTNF1  | METTL1 | 0.026946078 | 0.493702617  |
| PIFO     | METTL1 | 0.021430482 | 0.51057125   |
| XXYL1    | METTL1 | 6.12E-05    | -0.774435302 |
| CCS      | METTL1 | 1.72E-04    | 0.743431004  |
| SPERT    | METTL1 | 0.045756309 | 0.451362855  |
| SLC25A30 | METTL1 | 0.039172209 | 0.464306683  |
| PIK3R6   | METTL1 | 0.003870755 | -0.615435389 |
| MSRB3    | METTL1 | 0.012600257 | -0.546801063 |
| LEMD3    | METTL1 | 0.041468656 | 0.459613302  |
| FAM174A  | METTL1 | 0.044609259 | 0.453509578  |
| RGMB     | METTL1 | 0.001469166 | 0.662168447  |
| ZDHHC24  | METTL1 | 0.038298444 | -0.466148518 |
| TRMT10C  | METTL1 | 5.40E-06    | 0.832038415  |
| MGA      | METTL1 | 0.034722214 | 0.474045668  |
| C12orf66 | METTL1 | 0.001137835 | 0.673317036  |
| LIG4     | METTL1 | 0.002536461 | 0.636751154  |

|           |        |             |              |
|-----------|--------|-------------|--------------|
| RPL4      | METTL1 | 0.0383079   | 0.466128411  |
| SNAPC5    | METTL1 | 5.96E-06    | 0.830042119  |
| CNTNAP2   | METTL1 | 0.02333507  | 0.504393861  |
| GCSAM     | METTL1 | 0.027756527 | 0.491460099  |
| MRPL11    | METTL1 | 0.036889369 | 0.469188674  |
| AKIRIN1   | METTL1 | 0.006016347 | 0.591480461  |
| CMKLR1    | METTL1 | 0.043496369 | -0.455633396 |
| UGT8      | METTL1 | 0.003622222 | 0.61888388   |
| SLCO2A1   | METTL1 | 0.006957988 | -0.583164092 |
| LARP7     | METTL1 | 9.73E-05    | 0.761101955  |
| NR1D2     | METTL1 | 0.002356973 | 0.640300857  |
| WDR49     | METTL1 | 0.030233555 | -0.48491115  |
| SRP72     | METTL1 | 3.53E-04    | 0.719086104  |
| C4orf26   | METTL1 | 0.026302565 | 0.495521387  |
| CEP135    | METTL1 | 0.007886436 | 0.575823283  |
| DENND6A   | METTL1 | 0.037681722 | 0.467468251  |
| PDE12     | METTL1 | 0.022550791 | 0.506887314  |
| RSRC1     | METTL1 | 0.01590237  | 0.531391908  |
| CATSPERD  | METTL1 | 0.001537102 | 0.660148832  |
| METTL15P1 | METTL1 | 3.42E-05    | 0.789979927  |
| C19orf70  | METTL1 | 0.002816628 | 0.631608112  |
| C3orf33   | METTL1 | 0.030132603 | 0.485169659  |
| FUT1      | METTL1 | 0.008104143 | 0.574205027  |
| DHX36     | METTL1 | 7.16E-04    | 0.692406851  |
| ZG16      | METTL1 | 0.04358264  | 0.45546727   |
| CTBP2     | METTL1 | 0.015181858 | -0.534517769 |
| ATR       | METTL1 | 0.040826813 | 0.460904391  |
| GK5       | METTL1 | 0.005065664 | -0.60104316  |
| PDIK1L    | METTL1 | 1.49E-04    | 0.747982506  |
| ZNF654    | METTL1 | 6.83E-04    | 0.694310379  |
| PPM1E     | METTL1 | 0.003018021 | 0.628168384  |
| FAM131A   | METTL1 | 3.56E-04    | -0.718765415 |
| DDIT3     | METTL1 | 0.005783645 | 0.593699443  |
| ARHGAP1   | METTL1 | 0.019176039 | -0.518475065 |
| CATSPER1  | METTL1 | 0.011169024 | -0.554515311 |
| CST6      | METTL1 | 0.044202357 | -0.454281316 |
| CHRNA7    | METTL1 | 0.01369644  | -0.541358452 |
| CLTB      | METTL1 | 0.001883236 | -0.650891309 |
| RFESD     | METTL1 | 0.02903966  | 0.488012815  |
| SART1     | METTL1 | 0.027201568 | 0.492990006  |
| MCTP1     | METTL1 | 0.003561073 | -0.619762337 |
| POLD4     | METTL1 | 5.86E-04    | 0.700296842  |
| LRRC25    | METTL1 | 0.004781982 | -0.604183058 |
| UBQLNL    | METTL1 | 0.012704413 | 0.546267844  |
| LIPT2     | METTL1 | 2.99E-05    | 0.793414512  |
| KCNE3     | METTL1 | 0.006938656 | -0.583325269 |
| MRPL48    | METTL1 | 0.00637167  | 0.588224574  |
| SUGCT     | METTL1 | 0.006009431 | 0.59154539   |
| CCDC85B   | METTL1 | 0.016256229 | -0.529898179 |
| RMI2      | METTL1 | 0.031355815 | 0.482081987  |
| GPR156    | METTL1 | 0.002751664 | 0.632761378  |
| B3GNTL1   | METTL1 | 0.040519587 | -0.461527951 |
| TOMM5     | METTL1 | 0.009107842 | 0.567173687  |
| RUVBL1    | METTL1 | 0.002665707 | 0.634322683  |

|          |        |             |              |
|----------|--------|-------------|--------------|
| MSRA     | METTL1 | 0.003846941 | -0.615757745 |
| FAM172BP | METTL1 | 2.39E-04    | 0.732636839  |
| SWI5     | METTL1 | 0.019439171 | 0.51751555   |
| BAIAP2   | METTL1 | 0.001306386 | -0.667347326 |
| CALCB    | METTL1 | 0.019526434 | 0.517199633  |
| ORAI3    | METTL1 | 0.018921724 | -0.519412459 |
| UNC119B  | METTL1 | 0.007130051 | 0.581745507  |
| B3GALT6  | METTL1 | 0.04941113  | -0.444787623 |
| RPL23P2  | METTL1 | 0.039736595 | 0.463133862  |
| TPRN     | METTL1 | 0.002583219 | -0.635860934 |
| DLEU1    | METTL1 | 0.003017823 | 0.628171663  |
| TCP11L1  | METTL1 | 0.045971127 | -0.450965434 |
| HSF5     | METTL1 | 5.21E-04    | 0.704759978  |
| SPHK1    | METTL1 | 0.014288753 | -0.538562366 |
| BNIP3    | METTL1 | 0.012342602 | 0.548135572  |
| MYPOP    | METTL1 | 0.009088171 | -0.567305278 |
| SMIM19   | METTL1 | 2.13E-06    | 0.849682103  |
| RTTN     | METTL1 | 6.09E-04    | 0.698792786  |
| ZBTB8OS  | METTL1 | 0.011808971 | 0.550972714  |
| SLC35G1  | METTL1 | 0.016355468 | 0.529483954  |
| IDSP1    | METTL1 | 0.025684231 | -0.497302365 |
| CDC26    | METTL1 | 1.14E-04    | 0.756243538  |
| CRLF3    | METTL1 | 1.17E-04    | 0.75552597   |
| RNPEP    | METTL1 | 1.09E-04    | -0.757687545 |
| EID2     | METTL1 | 0.044666947 | 0.453400605  |
| EID2B    | METTL1 | 8.28E-04    | 0.686593551  |
| DNAJC30  | METTL1 | 0.035802004 | 0.471597045  |
| SLCO3A1  | METTL1 | 0.002182448 | -0.643975803 |
| DIRAS1   | METTL1 | 0.001071108 | 0.675888067  |
| GNG7     | METTL1 | 0.04921433  | 0.445132     |
| CNBD1    | METTL1 | 1.97E-04    | 0.739023868  |
| KBTBD11  | METTL1 | 0.042531007 | -0.457509884 |
| C8orf59  | METTL1 | 5.93E-04    | 0.699806075  |
| METRNL   | METTL1 | 0.017206794 | -0.526010834 |
| TCEANC   | METTL1 | 1.86E-04    | 0.740909205  |
| C8G      | METTL1 | 0.008906469 | -0.568531855 |
| GCNT4    | METTL1 | 5.75E-04    | 0.700987663  |
| THAP4    | METTL1 | 0.04101775  | 0.460518684  |
| HCG4     | METTL1 | 9.29E-04    | 0.681832816  |
| RHOG     | METTL1 | 0.032046128 | -0.480380915 |
| EPS8L2   | METTL1 | 0.016325046 | 0.529610721  |
| ANO6     | METTL1 | 0.005645466 | -0.59505205  |
| ZBTB34   | METTL1 | 7.02E-04    | -0.693192075 |
| FAM210A  | METTL1 | 0.018626909 | 0.520511806  |
| TALDO1   | METTL1 | 0.046884641 | -0.449291174 |
| ULK1     | METTL1 | 0.002063668 | -0.646620029 |
| B3GNT8   | METTL1 | 0.041395412 | -0.45975985  |
| FBXO39   | METTL1 | 2.34E-04    | 0.733342341  |
| BEND2    | METTL1 | 0.049792343 | -0.444123519 |
| RPL13AP3 | METTL1 | 0.006938081 | 0.583330064  |
| HIC1     | METTL1 | 0.015517104 | -0.53304885  |
| MAGEF1   | METTL1 | 0.002802539 | 0.631856335  |
| ZFAS1    | METTL1 | 0.00181122  | 0.652692306  |
| PAWR     | METTL1 | 0.01843142  | 0.521248453  |

|           |        |             |              |
|-----------|--------|-------------|--------------|
| TGIF1     | METTL1 | 1.23E-04    | 0.754087235  |
| NAP1L5    | METTL1 | 0.005426776 | 0.597249514  |
| CD19      | METTL1 | 0.007753817 | 0.57682704   |
| ARIH2     | METTL1 | 0.00376228  | 0.616917266  |
| RBM44     | METTL1 | 0.016706082 | -0.528036423 |
| ZBTB33    | METTL1 | 0.003951431 | 0.614355436  |
| SAMD12    | METTL1 | 0.004487774 | 0.607606275  |
| RPLP2     | METTL1 | 0.004921364 | 0.60262167   |
| CSTF2T    | METTL1 | 0.001535684 | 0.660190212  |
| CASC2     | METTL1 | 0.025364076 | -0.498237834 |
| IL17RA    | METTL1 | 0.017230001 | -0.525918101 |
| PNPLA2    | METTL1 | 0.002961447 | -0.629114874 |
| MBOAT4    | METTL1 | 0.006044404 | 0.59121771   |
| AGTRAP    | METTL1 | 2.43E-04    | -0.732082762 |
| THAP5     | METTL1 | 0.001519922 | 0.660652376  |
| CD151     | METTL1 | 0.002507382 | -0.63731171  |
| FAM20C    | METTL1 | 2.44E-04    | -0.731960098 |
| FLII      | METTL1 | 0.007184941 | -0.581298855 |
| ZCCHC3    | METTL1 | 0.008578553 | -0.570798026 |
| TMEM78    | METTL1 | 0.001961297 | 0.649003125  |
| CHID1     | METTL1 | 0.01379847  | 0.54086995   |
| UBE2N     | METTL1 | 7.20E-05    | 0.769843452  |
| ZNF354C   | METTL1 | 0.030219631 | 0.484946764  |
| MAMDC4    | METTL1 | 0.028603651 | -0.489170525 |
| BET1L     | METTL1 | 8.45E-04    | 0.685724342  |
| RPS27     | METTL1 | 2.82E-05    | 0.794859163  |
| ODF3B     | METTL1 | 0.015949106 | -0.531193104 |
| ZNRF3-AS1 | METTL1 | 0.022085096 | 0.508400617  |
| IMPDH2    | METTL1 | 8.18E-04    | 0.687043978  |
| C2orf69   | METTL1 | 9.59E-05    | 0.761548014  |
| STAP2     | METTL1 | 0.002011312 | 0.64782615   |
| PDE4DIP   | METTL1 | 0.011610204 | 0.552056044  |
| DDX10     | METTL1 | 7.71E-05    | 0.767912785  |
| ZNF518B   | METTL1 | 5.98E-06    | 0.829969639  |
| AMER3     | METTL1 | 7.57E-05    | 0.768432121  |
| LCORL     | METTL1 | 0.023977055 | -0.502401762 |
| ZNF454    | METTL1 | 0.011460495 | 0.552881951  |
| KDELC2    | METTL1 | 0.024487781 | 0.500846898  |
| PLEC      | METTL1 | 0.025230003 | -0.498632359 |
| PRSS36    | METTL1 | 0.004569007 | -0.606643003 |
| ZNF543    | METTL1 | 0.029799974 | 0.486026263  |
| WDR6      | METTL1 | 0.004664425 | 0.605529428  |
| GEN1      | METTL1 | 0.034955765 | 0.473511072  |
| TMEM11    | METTL1 | 0.032469649 | -0.479351417 |
| CALML3    | METTL1 | 1.97E-04    | 0.739023868  |
| FAM220A   | METTL1 | 0.022605129 | 0.506712359  |
| NT5DC1    | METTL1 | 2.73E-05    | 0.795746387  |
| RPS3AP5   | METTL1 | 6.05E-04    | 0.699022803  |
| COX14     | METTL1 | 0.004307533 | 0.609796146  |
| CD28      | METTL1 | 6.83E-04    | 0.694285145  |
| EPM2AIP1  | METTL1 | 0.018701298 | 0.52023311   |
| CTNNBIP1  | METTL1 | 7.70E-05    | -0.76794051  |
| GPR35     | METTL1 | 0.00319177  | -0.625350985 |
| SUZ12     | METTL1 | 0.024928147 | 0.499526699  |

|           |        |             |              |
|-----------|--------|-------------|--------------|
| KCTD12    | METTL1 | 0.010835978 | -0.55642449  |
| GRINA     | METTL1 | 4.29E-04    | -0.712020325 |
| ZHX2      | METTL1 | 5.75E-04    | 0.700992163  |
| MPI       | METTL1 | 8.33E-04    | 0.686304697  |
| OPLAH     | METTL1 | 0.001714379 | -0.655211172 |
| TAF7      | METTL1 | 1.11E-05    | 0.816907289  |
| PFAS      | METTL1 | 0.039434371 | 0.46376028   |
| ZNF552    | METTL1 | 0.027084134 | 0.493316896  |
| GAK       | METTL1 | 0.035223253 | -0.472902202 |
| ZBTB7A    | METTL1 | 0.005218955 | -0.599406395 |
| CTC1      | METTL1 | 0.039673146 | 0.463265064  |
| FBXO34    | METTL1 | 0.03065985  | 0.483826938  |
| EIF3K     | METTL1 | 0.005494052 | 0.596565858  |
| MRFAP1L1  | METTL1 | 0.00902923  | 0.567700952  |
| SNX18     | METTL1 | 0.015620593 | -0.532600552 |
| MRFAP1    | METTL1 | 3.41E-05    | 0.790075226  |
| RRS1      | METTL1 | 0.012847827 | 0.545539394  |
| TRIML2    | METTL1 | 0.001104444 | 0.674587241  |
| C12orf42  | METTL1 | 0.031536194 | 0.48163469   |
| CYC1      | METTL1 | 0.009073107 | -0.567406201 |
| GIMAP7    | METTL1 | 0.00995532  | 0.561712672  |
| EDC3      | METTL1 | 0.001641365 | 0.657190383  |
| LINC00311 | METTL1 | 1.43E-04    | 0.749436631  |
| MAGED1    | METTL1 | 0.009763506 | 0.5629146    |
| LDLRAD3   | METTL1 | 0.01724206  | -0.525869955 |
| DAND5     | METTL1 | 8.60E-04    | 0.685004428  |
| RAB39A    | METTL1 | 0.022289785 | -0.50773238  |
| PACS2     | METTL1 | 0.049349011 | -0.444896209 |
| VWA1      | METTL1 | 0.031004401 | 0.482959229  |
| GEMIN4    | METTL1 | 1.89E-06    | 0.851752039  |
| KLHL28    | METTL1 | 0.0146457   | 0.536922119  |
| C14orf28  | METTL1 | 2.63E-04    | 0.72940516   |
| LBX2      | METTL1 | 0.034428571 | -0.47472181  |
| SLITRK4   | METTL1 | 0.003526887 | -0.620258917 |
| HTR1D     | METTL1 | 0.032625837 | 0.478974403  |
| GCC1      | METTL1 | 2.46E-04    | 0.731729534  |
| ZFPM1     | METTL1 | 0.020580647 | -0.513469251 |
| CDC42EP4  | METTL1 | 0.003011312 | -0.62827985  |
| PCED1B    | METTL1 | 0.03973464  | 0.463137901  |
| ATP8B5P   | METTL1 | 0.009329716 | 0.565705282  |
| CDH5      | METTL1 | 0.014068213 | -0.53959235  |
| MYADM     | METTL1 | 0.004593681 | -0.606353218 |
| SERTAD2   | METTL1 | 0.020399019 | -0.514100928 |
| CITED4    | METTL1 | 0.042194904 | -0.458170923 |
| TIGD5     | METTL1 | 0.036783311 | -0.46942113  |
| ZNF154    | METTL1 | 0.038514936 | 0.465689155  |
| R3HDM2    | METTL1 | 0.025550423 | 0.497692216  |
| GPBAR1    | METTL1 | 0.011184913 | -0.554425386 |
| CCR8      | METTL1 | 0.046619059 | 0.44977532   |
| DCTPP1    | METTL1 | 0.011520266 | 0.552551165  |
| SOCS4     | METTL1 | 3.43E-04    | 0.720083141  |
| C3orf80   | METTL1 | 0.02251343  | -0.507007798 |
| TMEM150B  | METTL1 | 0.010343979 | -0.559333865 |
| RCC1      | METTL1 | 0.004459202 | 0.607948502  |

|           |        |             |              |
|-----------|--------|-------------|--------------|
| PRKRA     | METTL1 | 0.002157005 | 0.644531893  |
| PNPLA1    | METTL1 | 0.022630485 | -0.506630832 |
| ALX1      | METTL1 | 5.50E-04    | 0.7026734    |
| FZD2      | METTL1 | 0.029474397 | -0.486872002 |
| CCDC66    | METTL1 | 3.60E-05    | 0.788684045  |
| ATP5EP2   | METTL1 | 8.54E-04    | 0.685333796  |
| MCFD2     | METTL1 | 0.030817805 | 0.483428204  |
| HARBI1    | METTL1 | 0.003616307 | 0.618968316  |
| TPRXL     | METTL1 | 0.043379178 | 0.45585947   |
| ZNF571    | METTL1 | 7.20E-04    | 0.692176409  |
| GLIPR1L2  | METTL1 | 0.002378399 | 0.639865483  |
| C9orf139  | METTL1 | 0.029665384 | -0.486374998 |
| HIST1H2AC | METTL1 | 0.048818065 | -0.445828635 |
| MB21D2    | METTL1 | 0.003468849 | 0.621111172  |
| PCGF5     | METTL1 | 0.004461231 | 0.607924146  |
| CHRM4     | METTL1 | 0.012949435 | 0.545027256  |
| S1PR5     | METTL1 | 0.014932054 | -0.535629353 |
| WDFY3-AS2 | METTL1 | 0.021313092 | -0.510966056 |
| SRSF8     | METTL1 | 0.007848222 | 0.576111086  |
| ZDHHC20   | METTL1 | 0.039642222 | -0.463329071 |
| PPA1      | METTL1 | 0.002522799 | 0.637013853  |
| GREM2     | METTL1 | 1.71E-04    | 0.743709573  |
| C11orf42  | METTL1 | 0.003788937 | -0.616549853 |
| SSR4      | METTL1 | 0.02622067  | 0.495755357  |
| CUEDC1    | METTL1 | 0.001477928 | -0.661903603 |
| SCRIB     | METTL1 | 0.01303934  | -0.544576803 |
| ZNF572    | METTL1 | 0.019400339 | 0.517656497  |
| PITPNB    | METTL1 | 0.009035444 | 0.56765914   |
| MRPL14    | METTL1 | 0.00147682  | 0.661937048  |
| ZFP82     | METTL1 | 0.003077399 | 0.62719072   |
| OR56B2P   | METTL1 | 0.046544887 | 0.449910912  |
| OR56B1    | METTL1 | 0.028999912 | 0.48811779   |
| AEN       | METTL1 | 0.001470189 | 0.662137459  |
| METTL23   | METTL1 | 0.006274065 | 0.589103781  |
| OR52N4    | METTL1 | 0.010793119 | 0.556673621  |
| HLA-V     | METTL1 | 0.006112508 | 0.590584062  |
| NPM1      | METTL1 | 2.15E-05    | 0.801563006  |
| PJA1      | METTL1 | 0.007836728 | 0.576197882  |
| HIST3H2A  | METTL1 | 0.029675373 | -0.486349074 |
| ZNF746    | METTL1 | 0.027458207 | -0.492279481 |
| SLC25A41  | METTL1 | 0.035588955 | 0.472075575  |
| HEPHL1    | METTL1 | 0.02760367  | 0.491879073  |
| AATK      | METTL1 | 0.02760144  | -0.491885198 |
| ZNF467    | METTL1 | 7.92E-04    | -0.688395036 |
| RAP2B     | METTL1 | 0.001085924 | -0.675305794 |
| ZBTB2     | METTL1 | 0.008961749 | 0.568156549  |
| RNF135    | METTL1 | 0.006153707 | -0.590203544 |
| RPL24P4   | METTL1 | 0.010664388 | 0.557426759  |
| SETD2     | METTL1 | 1.98E-04    | 0.738953124  |
| MEX3D     | METTL1 | 0.013712016 | -0.54128369  |
| P2RY13    | METTL1 | 0.046910769 | -0.449243659 |
| TNFSF15   | METTL1 | 0.041129828 | 0.460292925  |
| PLAG1     | METTL1 | 0.009409064 | 0.565187036  |
| C3orf58   | METTL1 | 7.49E-04    | -0.690605195 |

|          |        |             |              |
|----------|--------|-------------|--------------|
| ZNF329   | METTL1 | 1.63E-04    | 0.745241651  |
| ZNF101   | METTL1 | 0.002293414 | 0.641612043  |
| CCDC149  | METTL1 | 0.016993899 | -0.526866238 |
| SNRPE    | METTL1 | 8.13E-05    | 0.766366606  |
| CHST15   | METTL1 | 0.00301782  | -0.628171718 |
| TMEM259  | METTL1 | 0.043411841 | -0.455796411 |
| TNRC18   | METTL1 | 3.61E-04    | -0.718293895 |
| TMEM30B  | METTL1 | 0.019252578 | 0.518194886  |
| IST1     | METTL1 | 0.005033393 | 0.60139293   |
| ERCC6L2  | METTL1 | 0.00294327  | 0.62942217   |
| MRPL41   | METTL1 | 0.037297851 | -0.468298197 |
| TP53TG1  | METTL1 | 6.92E-04    | 0.693784221  |
| UBA7     | METTL1 | 0.006058281 | 0.59108812   |
| MRPS16   | METTL1 | 0.009697696 | 0.563331399  |
| RAD51B   | METTL1 | 0.00236988  | 0.640038197  |
| EXT1     | METTL1 | 0.047665814 | -0.447879228 |
| SHMT2    | METTL1 | 0.00138697  | 0.664719659  |
| BACE2    | METTL1 | 0.022625995 | 0.506645264  |
| IZUMO1   | METTL1 | 7.07E-04    | 0.692916103  |
| TMIGD1   | METTL1 | 0.041516041 | 0.459518599  |
| AP1S2    | METTL1 | 0.025786357 | -0.497005897 |
| C8orf33  | METTL1 | 0.005431447 | 0.597201824  |
| GLTPD2   | METTL1 | 0.015375313 | -0.533666983 |
| LIPF     | METTL1 | 1.97E-04    | 0.739023868  |
| KBTBD3   | METTL1 | 0.001847856 | 0.651768758  |
| YBEY     | METTL1 | 0.004452775 | 0.60802574   |
| PGBD4    | METTL1 | 0.006022571 | 0.591422089  |
| KPNA2    | METTL1 | 0.002262447 | 0.642261912  |
| NCF1B    | METTL1 | 0.030285895 | -0.484777388 |
| BGN      | METTL1 | 0.001121197 | 0.673945959  |
| FES      | METTL1 | 0.0080774   | -0.574401883 |
| LIMK2    | METTL1 | 0.014067436 | 0.539596002  |
| SATB1    | METTL1 | 0.004264302 | 0.610332623  |
| CSF1R    | METTL1 | 0.032207174 | -0.479988196 |
| TSPAN10  | METTL1 | 0.018078913 | 0.522592705  |
| PLCB1    | METTL1 | 0.008739089 | -0.569679934 |
| TTC3     | METTL1 | 0.002346752 | 0.640509691  |
| SEPHS1P1 | METTL1 | 0.039123861 | 0.464407758  |
| C1orf116 | METTL1 | 0.037781258 | -0.467254124 |
| ACBD3    | METTL1 | 8.16E-04    | 0.687152221  |
| LCK      | METTL1 | 0.01052737  | 0.558236533  |
| GLUD2    | METTL1 | 0.005195412 | 0.599655178  |
| RPL35A   | METTL1 | 9.96E-05    | 0.760396223  |
| LENG9    | METTL1 | 0.018150635 | -0.522317514 |
| CEP63    | METTL1 | 0.013963226 | 0.540087244  |
| ODF3L1   | METTL1 | 0.013057185 | 0.544487687  |
| GJC1     | METTL1 | 0.012003458 | 0.549926904  |
| CNOT10   | METTL1 | 1.19E-04    | 0.754997718  |
| SLC8A1   | METTL1 | 0.015812146 | -0.531777026 |
| OTOP2    | METTL1 | 0.018909935 | -0.519456156 |
| WBP2NL   | METTL1 | 0.040316841 | 0.461941461  |
| OR2T11   | METTL1 | 0.001407051 | 0.664084879  |
| FANCF    | METTL1 | 6.14E-04    | 0.698486211  |
| SMDT1    | METTL1 | 0.045431449 | 0.451966592  |

|            |        |             |              |
|------------|--------|-------------|--------------|
| WT1-AS     | METTL1 | 5.50E-06    | 0.831651301  |
| RIMBP3C    | METTL1 | 0.016639021 | 0.528311392  |
| PTTG1IP    | METTL1 | 0.004434736 | -0.608243    |
| ABHD16B    | METTL1 | 0.03466267  | -0.474182413 |
| GBP6       | METTL1 | 0.00379969  | 0.616402254  |
| FHL3       | METTL1 | 0.025824659 | -0.496894947 |
| PMCH       | METTL1 | 9.89E-04    | 0.679250332  |
| CCDC159    | METTL1 | 0.029612419 | -0.486512577 |
| RIPK4      | METTL1 | 7.40E-04    | 0.691095849  |
| SF3A3      | METTL1 | 0.011167089 | 0.554526267  |
| TRIM61     | METTL1 | 0.003323504 | 0.623298633  |
| SSTR3      | METTL1 | 0.004700462 | 0.605113749  |
| GTF2H2C    | METTL1 | 0.04517138  | 0.452452317  |
| ASB7       | METTL1 | 0.001033763 | 0.677386518  |
| GPR132     | METTL1 | 0.037267572 | 0.468363942  |
| FAM46C     | METTL1 | 0.002150075 | 0.644684307  |
| HIST2H2AA3 | METTL1 | 0.006555325 | -0.586599778 |
| MRPL54     | METTL1 | 2.15E-04    | 0.736156274  |
| HMCES      | METTL1 | 4.23E-05    | 0.784437989  |
| FAM19A1    | METTL1 | 0.014787898 | 0.53627764   |
| EFHC2      | METTL1 | 0.041536858 | -0.45947702  |
| CMTM4      | METTL1 | 0.01606383  | -0.530707072 |
| ASCL2      | METTL1 | 0.020904952 | -0.512352312 |
| CBX6       | METTL1 | 0.009210186 | -0.566492775 |
| MACC1      | METTL1 | 0.003954639 | 0.614312862  |
| CHEK2      | METTL1 | 7.26E-04    | 0.691863065  |
| AIFM3      | METTL1 | 0.016408662 | -0.529262748 |
| KCTD16     | METTL1 | 0.014613016 | 0.537070965  |
| SLC35F3    | METTL1 | 0.013156768 | -0.543992205 |
| EMILIN3    | METTL1 | 1.16E-04    | 0.755900387  |
| CCR4       | METTL1 | 0.002008991 | 0.647880234  |
| LIN9       | METTL1 | 0.003815417 | 0.616187005  |
| SCN5A      | METTL1 | 0.044307135 | -0.454082071 |
| UTY        | METTL1 | 0.011405467 | 0.553187721  |
| TTC32      | METTL1 | 0.041259449 | 0.460032421  |
| HTR7P1     | METTL1 | 0.002862493 | -0.630807171 |
| KCNH8      | METTL1 | 0.001337447 | 0.66631878   |
| PP2D1      | METTL1 | 3.81E-04    | 0.716324337  |
| VPS33B     | METTL1 | 0.024211641 | 0.501684362  |
| ADAP2      | METTL1 | 0.038404399 | -0.465923445 |
| CLDN5      | METTL1 | 0.013350606 | -0.543036364 |
| NIPSNAP1   | METTL1 | 2.85E-04    | 0.726626616  |
| RPL7AP28   | METTL1 | 0.001154687 | 0.67268786   |
| NR2C2AP    | METTL1 | 6.79E-05    | 0.771528612  |
| PPP1R2     | METTL1 | 0.001200292 | 0.671023154  |
| TSPYL2     | METTL1 | 0.038618931 | 0.465469203  |
| PGP        | METTL1 | 0.003153089 | -0.625966963 |
| SNRNP35    | METTL1 | 1.48E-04    | 0.748251708  |
| IRAK1      | METTL1 | 0.045309449 | -0.452194183 |
| CMSS1      | METTL1 | 2.18E-09    | 0.932413051  |
| OLIG1      | METTL1 | 0.033575106 | -0.47671287  |
| PCDH9      | METTL1 | 0.007683085 | 0.577368135  |
| OAF        | METTL1 | 0.001111194 | -0.674327896 |
| LINC00315  | METTL1 | 0.022386596 | 0.507418018  |



|           |        |             |              |
|-----------|--------|-------------|--------------|
| TM2D3     | METTL1 | 0.002382616 | 0.639780195  |
| CLECL1    | METTL1 | 0.037068101 | 0.468798106  |
| CCSER1    | METTL1 | 1.67E-04    | 0.744374652  |
| ZDHC23    | METTL1 | 4.92E-04    | 0.706885889  |
| SPATA32   | METTL1 | 0.039497718 | 0.463628674  |
| PKP3      | METTL1 | 0.017572841 | -0.524559671 |
| MAML2     | METTL1 | 0.001582623 | 0.658837087  |
| TMEM255B  | METTL1 | 0.025336014 | -0.498320273 |
| PROS1     | METTL1 | 0.049727134 | -0.444236842 |
| HDDC3     | METTL1 | 0.001689557 | 0.65587596   |
| BEX5      | METTL1 | 0.001290121 | 0.667894175  |
| ZFP1      | METTL1 | 0.024471021 | 0.500897515  |
| DUSP8     | METTL1 | 0.046713286 | 0.449603307  |
| XPOT      | METTL1 | 6.99E-04    | 0.693351981  |
| PDE4B     | METTL1 | 4.26E-06    | 0.836707885  |
| RPL7P26   | METTL1 | 1.97E-04    | 0.739023868  |
| NELL2     | METTL1 | 1.20E-04    | 0.754836726  |
| HIST2H2BE | METTL1 | 0.012626564 | -0.546666048 |
| EIF4ENIF1 | METTL1 | 0.046315619 | 0.450331081  |
| RNLS      | METTL1 | 0.019820165 | 0.516144441  |
| NDUFA12   | METTL1 | 0.001763269 | 0.653925028  |
| RPS17     | METTL1 | 0.011415432 | 0.553132259  |
| UBE2G2    | METTL1 | 0.014708073 | 0.536638814  |
| SATL1     | METTL1 | 0.036014648 | 0.471121634  |
| SDR42E1   | METTL1 | 0.009017254 | 0.567781606  |
| ARMCX2    | METTL1 | 1.03E-05    | 0.818459076  |
| PIGW      | METTL1 | 1.42E-04    | 0.749671447  |
| BTBD6     | METTL1 | 0.003952971 | 0.614334988  |
| RBM43     | METTL1 | 0.004622805 | 0.606012818  |
| IMMP2L    | METTL1 | 3.51E-04    | 0.71934428   |
| TCEAL2    | METTL1 | 0.007317904 | 0.580228394  |
| FMNL1     | METTL1 | 0.001486968 | -0.661631753 |
| PTRHD1    | METTL1 | 0.013401663 | 0.542786458  |
| LCN12     | METTL1 | 0.037096982 | -0.468735132 |
| SORCS2    | METTL1 | 0.040673579 | -0.461214947 |
| SIVA1     | METTL1 | 0.029678616 | -0.486340657 |
| DGAT1     | METTL1 | 0.001973533 | -0.648712888 |
| CIB1      | METTL1 | 0.036771683 | 0.469446646  |
| EFCAB10   | METTL1 | 0.025158326 | -0.498843954 |
| RPS27L    | METTL1 | 0.012956179 | 0.544993379  |
| C6orf120  | METTL1 | 4.48E-04    | 0.710443193  |
| PRSS57    | METTL1 | 0.021535502 | -0.510219496 |
| TNFAIP2   | METTL1 | 2.02E-04    | -0.738180426 |
| RAB11B    | METTL1 | 0.011010047 | -0.5554208   |
| PRMT3     | METTL1 | 0.025566326 | 0.497645798  |
| GP1BA     | METTL1 | 0.026562578 | -0.49478233  |
| PRPF39    | METTL1 | 1.07E-05    | 0.817666465  |
| PPIL6     | METTL1 | 0.00271486  | 0.633424833  |
| RBM11     | METTL1 | 0.040838058 | 0.460881636  |
| GAS2L1    | METTL1 | 7.86E-04    | -0.688671159 |
| HGS       | METTL1 | 0.013925665 | -0.540265025 |
| RAD51D    | METTL1 | 0.027154135 | 0.493121906  |
| MAPK11    | METTL1 | 0.003562811 | 0.6197372    |
| SP140L    | METTL1 | 0.020349211 | 0.514274933  |

|           |        |             |              |
|-----------|--------|-------------|--------------|
| SMYD3     | METTL1 | 0.003780802 | 0.616661743  |
| PARBPB    | METTL1 | 0.005618567 | 0.59531852   |
| ROR1      | METTL1 | 5.69E-04    | 0.701405348  |
| BRCC3     | METTL1 | 0.049302588 | 0.444977429  |
| PRKG1     | METTL1 | 0.048929312 | -0.445632626 |
| LSAMP     | METTL1 | 1.43E-04    | 0.749417025  |
| MRPL40    | METTL1 | 6.94E-04    | 0.693682375  |
| NDUFA4L2  | METTL1 | 1.91E-04    | 0.740060419  |
| ZBTB3     | METTL1 | 0.047571678 | -0.44804843  |
| DRG1      | METTL1 | 8.96E-04    | 0.683333117  |
| MORF4L1   | METTL1 | 3.02E-04    | 0.724563672  |
| WDR53     | METTL1 | 4.25E-04    | 0.71239148   |
| PIGP      | METTL1 | 2.25E-04    | 0.734740777  |
| IKZF1     | METTL1 | 0.028090411 | 0.490551213  |
| RPL12P4   | METTL1 | 1.31E-06    | 0.858086053  |
| ZNF829    | METTL1 | 0.018799904 | 0.519865048  |
| TMPRSS11B | METTL1 | 0.030332287 | 0.484658979  |
| THNSL1    | METTL1 | 0.025926769 | 0.496599796  |
| IFITM1    | METTL1 | 8.44E-05    | 0.765297165  |
| LAMP1     | METTL1 | 7.53E-04    | -0.690432452 |
| POMK      | METTL1 | 0.030051052 | -0.485378985 |
| KLHL34    | METTL1 | 0.022575702 | 0.506807063  |
| ZNF267    | METTL1 | 0.002252139 | 0.642479876  |
| SHOX      | METTL1 | 0.022238191 | 0.507900355  |
| SLITRK2   | METTL1 | 0.011301107 | 0.553770907  |
| SDHAP3    | METTL1 | 0.004834562 | 0.603589686  |
| ZNF529    | METTL1 | 0.00567928  | 0.594718553  |
| DLEU7     | METTL1 | 0.01621851  | -0.530056153 |
| MATN1-AS1 | METTL1 | 1.32E-04    | 0.751950526  |
| AIDA      | METTL1 | 1.67E-04    | 0.744416774  |
| C15orf41  | METTL1 | 1.73E-04    | 0.743327339  |
| CD300LF   | METTL1 | 0.015848922 | -0.531619837 |
| ANKRD46   | METTL1 | 0.014011554 | 0.539859061  |
| PIP5K1C   | METTL1 | 9.04E-05    | -0.763285051 |
| CYP4F2    | METTL1 | 0.01976115  | 0.516355438  |
| ZBTB6     | METTL1 | 0.002713761 | 0.633444743  |
| WWOX      | METTL1 | 0.004764274 | 0.604384103  |
| POLR1D    | METTL1 | 0.008051234 | 0.57459501   |
| SAPCD2    | METTL1 | 0.046886395 | -0.449287984 |
| EDARADD   | METTL1 | 0.02771166  | 0.491582888  |
| KLHL32    | METTL1 | 0.0131896   | 0.543829511  |
| MKL2      | METTL1 | 0.026396269 | 0.495254384  |
| BTLA      | METTL1 | 0.036517935 | 0.470005066  |
| ZNF17     | METTL1 | 0.00999566  | 0.561462291  |
| PPP1CC    | METTL1 | 1.95E-04    | 0.73940308   |
| BACE1     | METTL1 | 0.020108388 | -0.515121078 |
| TMEM212   | METTL1 | 0.007924233 | 0.575539732  |
| RXRA      | METTL1 | 0.002108404 | -0.645609559 |
| C9orf47   | METTL1 | 0.014434837 | -0.537887139 |
| ZNF75D    | METTL1 | 0.003985415 | 0.613905965  |
| KRT10     | METTL1 | 5.43E-04    | 0.703205276  |
| GOLGA8R   | METTL1 | 0.027409818 | -0.492413048 |
| NKRF      | METTL1 | 1.16E-04    | 0.755737161  |
| NAP1L2    | METTL1 | 5.21E-04    | 0.704727463  |

|          |        |             |              |
|----------|--------|-------------|--------------|
| RPS23    | METTL1 | 4.16E-05    | 0.784895514  |
| CYP4F8   | METTL1 | 0.002082325 | 0.64619641   |
| CROCCP5  | METTL1 | 1.97E-04    | 0.739023868  |
| FOXD2    | METTL1 | 0.038143029 | -0.466479528 |
| UBE2H    | METTL1 | 0.014071629 | 0.539576297  |
| MIR22HG  | METTL1 | 0.036658328 | -0.469695733 |
| KTN1-AS1 | METTL1 | 2.68E-04    | 0.728726192  |
| KATNA1   | METTL1 | 0.025889111 | 0.496708541  |
| FSD2     | METTL1 | 0.024808689 | 0.499882997  |
| ARAP1    | METTL1 | 0.004068415 | -0.612821427 |
| ZFP91    | METTL1 | 0.019386941 | 0.51770518   |
| C17orf58 | METTL1 | 0.007605346 | -0.577967556 |
| BCDIN3D  | METTL1 | 3.34E-04    | 0.721028846  |
| CYP27C1  | METTL1 | 6.28E-04    | 0.697584855  |
| MST1L    | METTL1 | 0.001967816 | 0.648848309  |
| SPIN4    | METTL1 | 0.007156325 | -0.581531357 |
| ZSCAN30  | METTL1 | 0.019633416 | 0.516813856  |
| LILRB4   | METTL1 | 0.013999796 | -0.539914518 |
| RTN4RL2  | METTL1 | 0.018542453 | -0.520829292 |
| ZNF395   | METTL1 | 0.006391348 | 0.588048658  |
| TMEM232  | METTL1 | 0.011264924 | 0.553974126  |
| KANK3    | METTL1 | 0.031798896 | -0.480986818 |
| PNLIPRP1 | METTL1 | 0.032996262 | 0.478085863  |
| GPR141   | METTL1 | 0.026328569 | -0.495447215 |
| TMPRSS6  | METTL1 | 0.038731553 | -0.465231525 |
| TMEM262  | METTL1 | 8.32E-04    | 0.686384288  |
| C3orf70  | METTL1 | 0.026501383 | 0.494955756  |
| MITF     | METTL1 | 0.00796859  | -0.575208378 |
| NAP1L1   | METTL1 | 0.001025431 | 0.677727074  |
| MRPS21   | METTL1 | 8.58E-07    | 0.864986811  |
| RNF220   | METTL1 | 0.010415842 | 0.558901997  |
| TSPYL4   | METTL1 | 5.41E-04    | 0.703334276  |
| KRT12    | METTL1 | 0.028885168 | 0.488421457  |
| TAF9B    | METTL1 | 0.023858941 | 0.502765075  |
| CHP1     | METTL1 | 5.62E-06    | -0.831217771 |
| C11orf96 | METTL1 | 0.026773945 | -0.494185734 |
| PLEKHG7  | METTL1 | 0.00119738  | 0.671127858  |
| PTMA     | METTL1 | 0.028352723 | 0.4898431    |
| HSPA14   | METTL1 | 5.32E-04    | 0.70394489   |
| SIRT7    | METTL1 | 0.025319048 | -0.498370149 |
| AGMO     | METTL1 | 0.011236599 | 0.55413358   |
| TLR5     | METTL1 | 0.025030902 | -0.499221301 |
| USP7     | METTL1 | 1.20E-04    | 0.75479018   |
| MAGEH1   | METTL1 | 6.14E-05    | 0.774348242  |
| TET3     | METTL1 | 0.005111936 | -0.600544837 |
| TCL6     | METTL1 | 0.009865179 | 0.56227514   |
| DHRS4L2  | METTL1 | 0.00776741  | -0.576723516 |
| TMSB4XP8 | METTL1 | 0.00196372  | 0.648945544  |
| ERAS     | METTL1 | 0.02644482  | 0.495116334  |
| C2orf88  | METTL1 | 0.030019487 | -0.485460125 |
| TMEM203  | METTL1 | 0.02921744  | 0.487544686  |
| THSD4    | METTL1 | 6.90E-04    | 0.693868976  |
| TCEA1    | METTL1 | 1.32E-05    | 0.812967429  |
| FANCM    | METTL1 | 0.043039517 | 0.456517384  |

|                |        |             |              |
|----------------|--------|-------------|--------------|
| CARD9          | METTL1 | 0.002534411 | -0.636790498 |
| PEAR1          | METTL1 | 0.031847209 | -0.480868127 |
| TMEM256-PLSCR3 | METTL1 | 0.023190089 | 0.50484974   |
| EIF4EBP1       | METTL1 | 1.32E-04    | -0.751849964 |
| CLEC17A        | METTL1 | 0.005573084 | 0.595771485  |
| LCN10          | METTL1 | 0.027532004 | 0.492076135  |
| KLHL17         | METTL1 | 0.01586402  | -0.531555387 |
| SCGB1C1        | METTL1 | 0.025256273 | -0.498554924 |
| PRSS45         | METTL1 | 7.80E-04    | 0.688969224  |
| OTOG           | METTL1 | 1.97E-04    | 0.739023868  |
| TMPPE          | METTL1 | 0.006879954 | -0.58381694  |
| NUTM2B         | METTL1 | 0.039621236 | -0.463372529 |
| DCUN1D3        | METTL1 | 0.0229699   | -0.505546443 |
| COMMD6         | METTL1 | 7.19E-05    | 0.769907677  |
| PLA2G2A        | METTL1 | 1.97E-04    | 0.739023868  |
| HYKK           | METTL1 | 0.015978869 | 0.531066742  |
| FAM230A        | METTL1 | 0.033784978 | 0.476219625  |
| ZNF383         | METTL1 | 0.044804468 | 0.453141265  |
| ZNF669         | METTL1 | 7.80E-05    | 0.767564319  |
| C19orf35       | METTL1 | 0.046614076 | -0.449784425 |
| CHM            | METTL1 | 0.0096869   | 0.56339999   |
| BLOC1S5        | METTL1 | 4.65E-04    | 0.709049699  |
| CERKL          | METTL1 | 0.015494065 | 0.533148981  |
| IER5L          | METTL1 | 0.003799937 | -0.616398865 |
| LCTL           | METTL1 | 0.023451691 | 0.504028784  |
| SRSF10         | METTL1 | 0.002313363 | 0.641197273  |
| C15orf52       | METTL1 | 0.014100326 | -0.539441567 |
| FAM72B         | METTL1 | 0.047425231 | -0.448312169 |
| SUMO2          | METTL1 | 0.002206691 | 0.643450968  |
| NANOS1         | METTL1 | 0.005153153 | 0.600104077  |
| DPYD           | METTL1 | 0.024840862 | -0.499786905 |
| RHCE           | METTL1 | 0.03761304  | 0.467616261  |
| ZDHHC9         | METTL1 | 0.048989373 | 0.445526946  |
| ZBED6CL        | METTL1 | 1.82E-06    | 0.852487344  |
| TMSB4XP2       | METTL1 | 0.025400526 | 0.498130861  |
| ZNF548         | METTL1 | 0.017323953 | 0.525543702  |
| MTF1           | METTL1 | 0.026103847 | -0.496090117 |
| RPL14          | METTL1 | 3.03E-04    | 0.724488588  |
| FAM78B         | METTL1 | 0.001263281 | 0.668809332  |
| ZNF563         | METTL1 | 0.001653879 | 0.656845991  |
| TRMT2B         | METTL1 | 0.001073582 | 0.675790383  |
| LIPI           | METTL1 | 0.001013052 | 0.67823732   |
| ZNF567         | METTL1 | 0.020458672 | 0.513892971  |
| NDUFA4         | METTL1 | 0.007290905 | 0.580444461  |
| ALKBH2         | METTL1 | 5.79E-06    | 0.830633342  |
| RNF222         | METTL1 | 0.013330399 | 0.54313548   |
| TMEM120A       | METTL1 | 0.005942705 | -0.592174943 |
| SP6            | METTL1 | 0.030338566 | 0.484642965  |
| ZNF527         | METTL1 | 0.006645244 | 0.585817844  |
| ZAR1L          | METTL1 | 0.002866515 | 0.630737437  |
| S100A13        | METTL1 | 0.02215536  | 0.508170677  |
| ZNF33A         | METTL1 | 0.017857579 | 0.523447486  |
| PCDH18         | METTL1 | 0.019716476 | 0.516515497  |
| TSPYL1         | METTL1 | 0.008119192 | 0.574094487  |

|           |        |             |              |
|-----------|--------|-------------|--------------|
| PNRC2     | METTL1 | 0.001173236 | 0.672004208  |
| C6orf222  | METTL1 | 2.33E-04    | 0.73349768   |
| GSPT2     | METTL1 | 1.30E-05    | 0.813289158  |
| C8orf76   | METTL1 | 0.007831156 | 0.576239992  |
| MMP23B    | METTL1 | 0.008176727 | -0.573673387 |
| ZFP92     | METTL1 | 0.003589639 | -0.619350416 |
| USP32P3   | METTL1 | 0.04051877  | -0.461529614 |
| BLOC1S2   | METTL1 | 0.004247958 | 0.610536623  |
| PAX5      | METTL1 | 0.002023476 | 0.64754361   |
| SPOCK3    | METTL1 | 0.007586992 | -0.578109809 |
| KIAA0895L | METTL1 | 0.018839589 | -0.519717353 |
| ACADSB    | METTL1 | 0.017254208 | 0.525821481  |
| STK40     | METTL1 | 0.019892701 | -0.515885783 |
| SEMA4A    | METTL1 | 0.007155186 | -0.581540626 |
| RNF216P1  | METTL1 | 0.003524112 | 0.620299397  |
| SIRPB2    | METTL1 | 0.019994402 | -0.51552439  |
| ZNF766    | METTL1 | 6.13E-06    | 0.829446399  |
| RYR1      | METTL1 | 0.033166486 | -0.477680158 |
| SUPT5H    | METTL1 | 0.001224525 | 0.670160146  |
| ZNF107    | METTL1 | 0.039252245 | 0.464139569  |
| PPIA      | METTL1 | 2.39E-04    | 0.732669144  |
| GRM7      | METTL1 | 0.047142007 | -0.448824011 |
| SUPT3H    | METTL1 | 1.39E-04    | 0.75022858   |
| GIMAP5    | METTL1 | 0.011245567 | 0.554083059  |
| CGB7      | METTL1 | 0.025110087 | 0.498986628  |
| CD55      | METTL1 | 0.035852875 | 0.471483113  |
| SRGAP2B   | METTL1 | 0.019580561 | -0.51700424  |
| FUT4      | METTL1 | 0.002718173 | -0.633364804 |
| ASB13     | METTL1 | 0.039604759 | -0.463406661 |
| SLC35F1   | METTL1 | 0.031668151 | 0.481308732  |
| ZNF781    | METTL1 | 0.018498786 | 0.5209939    |
| EVL       | METTL1 | 0.040162831 | 0.462256647  |
| ZNF765    | METTL1 | 0.001292269 | 0.667821622  |
| XRCC6     | METTL1 | 9.71E-04    | 0.680028156  |
| PPP1R26   | METTL1 | 2.43E-04    | -0.732035555 |
| ZNF569    | METTL1 | 0.020522159 | 0.513672177  |
| ARMCX4    | METTL1 | 0.004898224 | 0.602878345  |
| PIK3R4    | METTL1 | 0.049808644 | 0.444095207  |
| ZNF775    | METTL1 | 0.0406434   | 0.461276216  |
| RFX8      | METTL1 | 0.02933623  | 0.487233133  |
| MYL6B     | METTL1 | 0.018883007 | 0.519556049  |
| ZNF799    | METTL1 | 0.046301224 | -0.450357517 |
| ESRRG     | METTL1 | 0.007167467 | 0.581440741  |
| IPO4      | METTL1 | 0.024695176 | 0.50022282   |
| NCOR2     | METTL1 | 5.06E-05    | -0.779678508 |
| GDAP2     | METTL1 | 0.004683757 | -0.60530611  |
| TCEAL3    | METTL1 | 0.027058453 | 0.493388528  |
| NACA      | METTL1 | 0.001836321 | 0.652057868  |
| MAN2A2    | METTL1 | 0.008420509 | -0.571915563 |
| FAM72A    | METTL1 | 0.00848652  | -0.571446735 |
| SULF2     | METTL1 | 0.003428927 | -0.621704315 |
| PLXNB2    | METTL1 | 0.003886755 | -0.615219742 |
| MKL1      | METTL1 | 0.040183683 | -0.462213918 |
| HLA-DQB2  | METTL1 | 0.025273868 | 0.4985031    |

|           |        |             |              |
|-----------|--------|-------------|--------------|
| TCF4      | METTL1 | 0.00786454  | 0.575988054  |
| ZNF136    | METTL1 | 6.06E-04    | 0.698966259  |
| TRAPPC4   | METTL1 | 5.65E-04    | 0.701669741  |
| HSH2D     | METTL1 | 0.010253417 | 0.55988158   |
| AMZ2      | METTL1 | 5.75E-04    | 0.701022147  |
| ZNF418    | METTL1 | 0.040940346 | 0.460674878  |
| DAPK1     | METTL1 | 0.003865842 | -0.615501761 |
| MAML3     | METTL1 | 0.01152089  | -0.552547723 |
| STRN3     | METTL1 | 0.010400956 | 0.558991261  |
| C6orf106  | METTL1 | 0.010813607 | 0.556554426  |
| PATE2     | METTL1 | 0.027735999 | 0.491516259  |
| PPTC7     | METTL1 | 0.017669116 | 0.524182021  |
| HIST3H2BB | METTL1 | 0.025673775 | -0.497332771 |
| KPNA5     | METTL1 | 0.00805194  | 0.574589798  |
| PDLIM7    | METTL1 | 0.036400491 | -0.470264545 |
| FAM3C     | METTL1 | 0.001535623 | 0.660191972  |
| SLC39A10  | METTL1 | 0.014049132 | 0.539682072  |
| AP2A1     | METTL1 | 0.001686223 | -0.655965883 |
| FUT11     | METTL1 | 0.037996477 | -0.466792624 |
| WDR5B     | METTL1 | 0.020259286 | 0.514589951  |
| WDR45     | METTL1 | 0.001187732 | 0.67147623   |
| METTL9    | METTL1 | 0.010355188 | -0.559266341 |
| ZSCAN25   | METTL1 | 0.003428762 | 0.621706771  |
| GMFB      | METTL1 | 0.030075928 | 0.485315084  |
| SIGLEC15  | METTL1 | 0.006927485 | -0.583418564 |
| ZNF420    | METTL1 | 0.001986451 | 0.648408089  |
| MAFG      | METTL1 | 2.13E-04    | -0.73655599  |
| ARRDC1    | METTL1 | 0.00237581  | -0.639917918 |
| IGF2R     | METTL1 | 0.022928136 | -0.505679186 |
| PCBP2     | METTL1 | 0.036135305 | 0.470852848  |
| SLC25A29  | METTL1 | 0.034922369 | -0.473587344 |
| PGAP1     | METTL1 | 0.004369298 | 0.609037328  |
| SRC       | METTL1 | 0.036518905 | -0.470002925 |
| LRRRC8B   | METTL1 | 0.026390729 | 0.495270148  |
| HIST1H3J  | METTL1 | 0.025895257 | -0.496690784 |
| PIWIL2    | METTL1 | 0.026049906 | 0.496245083  |
| SLC22A4   | METTL1 | 0.049132256 | -0.445275934 |
| ENTPD4    | METTL1 | 0.014512218 | 0.537531695  |
| C1D       | METTL1 | 0.037153364 | 0.468612303  |
| HIST1H4J  | METTL1 | 0.002862693 | 0.630803693  |
| SERPINA1  | METTL1 | 0.036828603 | -0.469321795 |
| EIF4BP6   | METTL1 | 0.003872671 | 0.61540953   |
| C6orf141  | METTL1 | 0.005967194 | 0.591943219  |
| IL27      | METTL1 | 0.023340929 | -0.504375487 |
| ZNF165    | METTL1 | 2.79E-04    | 0.727322655  |
| ZNF720    | METTL1 | 0.013509763 | 0.542259867  |
| MRPL21    | METTL1 | 0.003968769 | 0.614125728  |
| UAP1L1    | METTL1 | 0.036710176 | -0.469581728 |
| BNIP3P1   | METTL1 | 0.020759221 | 0.512852504  |
| OR8S1     | METTL1 | 1.97E-04    | 0.739023868  |
| ADARB1    | METTL1 | 0.022582978 | 0.506783638  |
| ZNF860    | METTL1 | 0.006378889 | 0.588159985  |
| DCHS2     | METTL1 | 0.04252962  | 0.457512604  |
| GGT3P     | METTL1 | 1.88E-04    | 0.740588227  |

|           |        |             |              |
|-----------|--------|-------------|--------------|
| IPP       | METTL1 | 0.005635362 | 0.595152018  |
| GSTK1     | METTL1 | 0.007684579 | 0.577356668  |
| HIST1H2BH | METTL1 | 0.011191389 | -0.554388766 |
| ZNF628    | METTL1 | 0.017065355 | -0.526578176 |
| LINC00477 | METTL1 | 0.007358396 | 0.57990556   |
| MIB2      | METTL1 | 0.003395873 | -0.622199757 |
| ATG7      | METTL1 | 0.034011019 | -0.475691051 |
| RAB40C    | METTL1 | 0.002538168 | -0.636718413 |
| TOPORS    | METTL1 | 0.026101028 | 0.496098209  |
| DMBX1     | METTL1 | 0.001023607 | 0.677801921  |
| ENPP1     | METTL1 | 0.041546589 | 0.45945759   |
| MPEG1     | METTL1 | 0.014471941 | -0.537716514 |
| DPP4      | METTL1 | 0.003766565 | 0.616858057  |
| PDCD1LG2  | METTL1 | 0.030930073 | 0.483145773  |
| DNAH10    | METTL1 | 0.017199178 | -0.526041288 |
| SPTAN1    | METTL1 | 0.018171137 | 0.522239008  |
| KLHL14    | METTL1 | 1.39E-04    | 0.750197291  |
| PTMAP2    | METTL1 | 0.004839471 | 0.603534557  |
| PSAP      | METTL1 | 0.035240245 | -0.472863644 |
| RPL37A    | METTL1 | 2.00E-06    | 0.850784305  |
| CFD       | METTL1 | 0.020148946 | -0.514978013 |
| OCLN      | METTL1 | 0.009583728 | 0.56405867   |
| HIST1H2BF | METTL1 | 0.021411563 | -0.510634762 |
| SLC22A20  | METTL1 | 0.027977976 | -0.490856326 |
| FAM212B   | METTL1 | 0.006082277 | -0.590864618 |
| SGTB      | METTL1 | 0.001763793 | 0.653911407  |
| FAM49A    | METTL1 | 0.045840185 | -0.45120751  |
| ADH5      | METTL1 | 0.025555696 | 0.497676823  |
| HIST1H4K  | METTL1 | 0.021810041 | -0.50930636  |
| RPL12     | METTL1 | 2.61E-04    | 0.729650985  |
| C1orf122  | METTL1 | 0.008193498 | -0.573551097 |
| SNHG12    | METTL1 | 7.49E-04    | 0.690620572  |
| IRAK4     | METTL1 | 0.045599045 | 0.45165471   |
| MRPL42    | METTL1 | 0.026343138 | 0.495405686  |
| ZNF560    | METTL1 | 0.003855514 | 0.615641504  |
| RPS4X     | METTL1 | 5.86E-05    | 0.77566072   |
| ZNF273    | METTL1 | 2.64E-06    | 0.845773758  |
| ZNF84     | METTL1 | 0.038801133 | 0.465084951  |
| MAK16     | METTL1 | 1.80E-04    | 0.742090552  |
| SIRPA     | METTL1 | 7.92E-04    | -0.688350678 |
| PRIM1     | METTL1 | 7.28E-04    | 0.691773585  |
| ZBTB14    | METTL1 | 4.41E-04    | 0.710972832  |
| CD2AP     | METTL1 | 0.001348811 | 0.66594749   |
| ZNF649    | METTL1 | 9.00E-04    | 0.683179772  |
| TOR4A     | METTL1 | 0.002648797 | -0.634634744 |
| HIBCH     | METTL1 | 0.005180716 | 0.599810943  |
| ZNF544    | METTL1 | 0.009345558 | 0.565601529  |
| ZNF770    | METTL1 | 0.001532104 | 0.660294816  |
| HMG5      | METTL1 | 0.004431701 | 0.608279629  |
| MIER1     | METTL1 | 0.010747701 | 0.556938501  |
| SVIP      | METTL1 | 1.22E-04    | 0.754195918  |
| DDRGK1    | METTL1 | 0.006519613 | -0.586912766 |
| ZXDA      | METTL1 | 0.044497162 | 0.45372164   |
| RPS6KL1   | METTL1 | 0.047833801 | 0.447577921  |

|         |        |             |              |
|---------|--------|-------------|--------------|
| CSF2RA  | METTL1 | 0.026577859 | -0.494739073 |
| RPL23A  | METTL1 | 8.46E-05    | 0.765228592  |
| UBL5    | METTL1 | 0.001571823 | 0.659145412  |
| TMEM116 | METTL1 | 0.027986395 | 0.490833444  |
| SDAD1   | METTL1 | 0.029904012 | 0.485757536  |
| FAM109A | METTL1 | 0.003127416 | -0.626379285 |
| TMEM239 | METTL1 | 0.034838322 | 0.473779549  |
| HYLS1   | METTL1 | 0.0234455   | 0.504048129  |
| ZNF442  | METTL1 | 0.02218884  | 0.508061318  |
| ZNF813  | METTL1 | 0.002313255 | 0.641199519  |
| GFPT1   | METTL1 | 0.039104212 | 0.464448864  |
| UVRAG   | METTL1 | 9.79E-04    | 0.679662886  |
| ZNF26   | METTL1 | 0.002531702 | 0.636842526  |
| ZNF568  | METTL1 | 0.011811104 | 0.55096117   |
| ZXDB    | METTL1 | 0.004176586 | 0.61143513   |
| CYP21A2 | METTL1 | 0.010297997 | -0.55961147  |
| ZNF480  | METTL1 | 0.002241103 | 0.642714164  |
| GPN1    | METTL1 | 4.90E-04    | 0.70705571   |
| ZNF627  | METTL1 | 0.01518898  | 0.534486296  |
| TLK1    | METTL1 | 0.001776728 | 0.653576217  |
| LRBA    | METTL1 | 0.016226606 | 0.530022219  |
| COPS8   | METTL1 | 0.032450994 | 0.479396541  |
| PPIAP22 | METTL1 | 0.009215234 | 0.566459354  |
| FAM3D   | METTL1 | 0.014869607 | -0.535909566 |
| TAT     | METTL1 | 9.72E-04    | 0.67995836   |
| PAPSS2  | METTL1 | 0.047141282 | -0.448825325 |
| CEP290  | METTL1 | 0.015309623 | 0.533954909  |
| MT-CO2  | METTL1 | 0.037999753 | -0.466785614 |
| ECI2    | METTL1 | 0.004278415 | 0.610156993  |
| GPATCH3 | METTL1 | 0.002663883 | 0.634356253  |
| GATSL2  | METTL1 | 0.008863631 | -0.568824001 |
| RPL10A  | METTL1 | 2.34E-04    | 0.733326022  |
| MT-ND2  | METTL1 | 0.018859993 | -0.519641514 |
| SYCP1   | METTL1 | 0.007698323 | 0.577251225  |
| FAM169A | METTL1 | 0.002152886 | 0.644622446  |
| ZNF830  | METTL1 | 5.28E-06    | 0.832462956  |
| MT-ND5  | METTL1 | 0.005633644 | -0.59516903  |
| CNOT7   | METTL1 | 5.50E-08    | 0.902036964  |
| MTOR    | METTL1 | 0.028487857 | 0.489480314  |
| BRINP2  | METTL1 | 1.97E-04    | 0.739023868  |
| MT-CO1  | METTL1 | 0.005670055 | -0.594809378 |
| FOXJ3   | METTL1 | 0.011118474 | 0.55480209   |
| INPP5F  | METTL1 | 0.027555949 | 0.492010248  |
| DENND4B | METTL1 | 0.038182242 | -0.466395912 |
| KTI12   | METTL1 | 0.007574571 | 0.57820624   |
| CD3E    | METTL1 | 0.001711011 | 0.655300895  |
| RUSC2   | METTL1 | 0.011385652 | -0.553298116 |
| TSEN15  | METTL1 | 0.041324429 | 0.459902066  |
| TYW1    | METTL1 | 0.002815813 | 0.631622443  |
| MT-ND1  | METTL1 | 9.19E-04    | -0.682298704 |
| PRMT6   | METTL1 | 0.005205741 | 0.599545918  |
| CAPZA2  | METTL1 | 0.025314499 | -0.498383527 |
| TOP1    | METTL1 | 0.016968396 | 0.52696928   |
| MAP3K3  | METTL1 | 0.001352173 | -0.66583814  |



|             |        |             |              |
|-------------|--------|-------------|--------------|
| RPL39       | METTL1 | 1.10E-04    | 0.757446421  |
| NOS1AP      | METTL1 | 0.039880561 | -0.462836761 |
| GPRASP1     | METTL1 | 6.60E-04    | 0.695611971  |
| ZFP2        | METTL1 | 0.016263343 | 0.529868419  |
| L3MBTL3     | METTL1 | 5.84E-05    | 0.775735477  |
| DMD         | METTL1 | 0.001173472 | 0.671995581  |
| NAGA        | METTL1 | 0.002694368 | -0.633797488 |
| PJA2        | METTL1 | 0.006203759 | 0.589744073  |
| SGMS1       | METTL1 | 0.044987958 | 0.452796186  |
| MIR324      | METTL1 | 0.010925767 | 0.555905139  |
| MIRLET7A1   | METTL1 | 0.011278189 | 0.553899565  |
| RNU5A-1     | METTL1 | 4.17E-05    | 0.784838208  |
| SNORD104    | METTL1 | 1.85E-04    | 0.741138761  |
| RNA5SP383   | METTL1 | 0.035032154 | -0.473336822 |
| RNU1-134P   | METTL1 | 0.013762299 | -0.541042798 |
| RNU6-490P   | METTL1 | 0.001537011 | 0.660151486  |
| SNORA73B    | METTL1 | 1.64E-05    | 0.808036056  |
| RNA5SP393   | METTL1 | 0.00871869  | 0.569821074  |
| SNORA38B    | METTL1 | 0.002328349 | 0.640887646  |
| RNU6-1099P  | METTL1 | 0.013311811 | 0.543226765  |
| SNORA33     | METTL1 | 2.03E-04    | 0.738121198  |
| RNU6-226P   | METTL1 | 0.041075033 | -0.46040324  |
| RNU4-1      | METTL1 | 5.26E-04    | 0.704405307  |
| RNU6-595P   | METTL1 | 0.021185616 | -0.511396748 |
| SNORA74A    | METTL1 | 6.51E-05    | 0.772724231  |
| RNY1        | METTL1 | 7.76E-05    | 0.767720675  |
| RNA5S9      | METTL1 | 1.97E-04    | 0.739023868  |
| RNU6-343P   | METTL1 | 0.001149414 | 0.67288391   |
| RN7SKP78    | METTL1 | 0.032680369 | -0.478843103 |
| RNU6-1240P  | METTL1 | 1.47E-05    | 0.810525724  |
| RN7SK       | METTL1 | 2.95E-04    | 0.725474065  |
| RNU6-8      | METTL1 | 0.004534101 | 0.607055176  |
| RN7SKP230   | METTL1 | 0.016555802 | 0.528653853  |
| VTRNA1-3    | METTL1 | 7.76E-05    | 0.767720691  |
| RNU4-2      | METTL1 | 2.02E-06    | 0.85063253   |
| ZNF525      | METTL1 | 0.001123197 | 0.673869958  |
| BTBD7P1     | METTL1 | 0.040715084 | 0.46113074   |
| RBMS3-AS2   | METTL1 | 9.20E-04    | 0.682272132  |
| MRPS18B     | METTL1 | 0.014639553 | 0.536950094  |
| CHML        | METTL1 | 0.002691545 | 0.633849005  |
| C1orf53     | METTL1 | 0.00531979  | -0.598351205 |
| SAMD5       | METTL1 | 4.38E-06    | 0.8361783    |
| CENPW       | METTL1 | 0.009062724 | 0.567475847  |
| FAM229B     | METTL1 | 0.025017721 | 0.499260422  |
| FANK1       | METTL1 | 1.23E-05    | 0.814566834  |
| HIST2H2BC   | METTL1 | 0.033219038 | -0.477555238 |
| CHIAP2      | METTL1 | 0.016817365 | 0.527582076  |
| PCMTD2      | METTL1 | 0.004022829 | 0.613414792  |
| CYP17A1-AS1 | METTL1 | 0.010051475 | 0.561117219  |
| KHDC3L      | METTL1 | 1.97E-04    | 0.739023868  |
| LIPN        | METTL1 | 0.009284613 | -0.566001459 |
| LINC00963   | METTL1 | 0.006537628 | -0.586754701 |
| SYS1        | METTL1 | 0.009149769 | 0.566893989  |
| MAFB        | METTL1 | 0.014286442 | -0.538573092 |

|           |        |             |              |
|-----------|--------|-------------|--------------|
| TRAF3IP1  | METTL1 | 0.002081263 | 0.646220443  |
| CHIC1     | METTL1 | 0.024892782 | 0.499632039  |
| NAP1L6    | METTL1 | 0.01170032  | 0.551563046  |
| GIGYF2    | METTL1 | 0.035345011 | 0.472626242  |
| NHSL2     | METTL1 | 0.002989979 | -0.628635659 |
| GGTA1P    | METTL1 | 0.025327574 | -0.498345083 |
| PHACTR4   | METTL1 | 0.014744961 | -0.536471716 |
| ASAH2B    | METTL1 | 0.024792787 | 0.499930528  |
| CXorf65   | METTL1 | 0.008346042 | 0.572448065  |
| LRRC37A5P | METTL1 | 1.01E-05    | 0.818832837  |
| ZDBF2     | METTL1 | 1.15E-05    | 0.816027032  |
| PFDN6     | METTL1 | 0.00925262  | 0.566212264  |
| RING1     | METTL1 | 0.001488952 | 0.661572292  |
| HLA-DOA   | METTL1 | 0.016508063 | 0.528850929  |
| HNRNPCP2  | METTL1 | 0.032981857 | 0.47812027   |
| COL5A2    | METTL1 | 0.002986301 | 0.628697225  |
| TAP2      | METTL1 | 0.023179466 | 0.504883233  |
| HLA-DQA2  | METTL1 | 0.025978868 | 0.496449557  |
| COL15A1   | METTL1 | 0.012303217 | -0.548341539 |
| NOTCH4    | METTL1 | 0.007726373 | -0.577036505 |
| AGER      | METTL1 | 0.020434982 | 0.513975498  |
| SMIM5     | METTL1 | 0.029171647 | -0.487665054 |
| STK19     | METTL1 | 4.57E-04    | 0.709679373  |
| DXO       | METTL1 | 0.007499053 | 0.578795314  |
| C6orf48   | METTL1 | 3.64E-04    | 0.717990905  |
| CASP12    | METTL1 | 0.004133957 | 0.61197787   |
| MBD5      | METTL1 | 0.033211427 | 0.47757332   |
| CSNK2B    | METTL1 | 0.014774742 | 0.536337056  |
| APOM      | METTL1 | 0.021806418 | 0.509318352  |
| TRIM64    | METTL1 | 0.010533478 | 0.558200254  |
| NCR3      | METTL1 | 0.024276922 | 0.501485701  |
| LTB       | METTL1 | 0.017951398 | 0.523084134  |
| ZNF551    | METTL1 | 0.016003115 | 0.530963943  |
| ABCF1     | METTL1 | 0.004297138 | 0.609924736  |
| PRR3      | METTL1 | 0.028887162 | 0.488416172  |
| LILRB3    | METTL1 | 0.026278657 | -0.495589633 |
| TRIM39    | METTL1 | 1.89E-05    | 0.804678952  |
| ZNF616    | METTL1 | 0.047396099 | 0.448364708  |
| HLA-J     | METTL1 | 0.020662127 | 0.513187317  |
| HLA-G     | METTL1 | 0.038242677 | 0.466267173  |
| TBC1D8    | METTL1 | 0.010639194 | -0.55757502  |
| AKT1S1    | METTL1 | 0.020933355 | -0.512255145 |
| OR2H1     | METTL1 | 0.004088827 | 0.612557509  |
| RANBP17   | METTL1 | 0.033258564 | -0.477461383 |
| FAM216A   | METTL1 | 0.032789694 | 0.478580391  |
| IGFL4     | METTL1 | 0.01804422  | 0.522726135  |
| MZT1      | METTL1 | 6.62E-06    | 0.82788567   |
| TRIM13    | METTL1 | 0.001384313 | 0.664804233  |
| TMEM231   | METTL1 | 0.029210103 | 0.48756396   |
| C2orf91   | METTL1 | 0.009535546 | 0.564368253  |
| CCNI2     | METTL1 | 7.07E-04    | 0.692932194  |
| TRIQQ     | METTL1 | 0.040573316 | -0.461418638 |
| ARID3C    | METTL1 | 0.010399818 | 0.558998084  |
| SLC10A5P1 | METTL1 | 0.042009289 | 0.458537731  |

|             |        |             |              |
|-------------|--------|-------------|--------------|
| ZBTB10      | METTL1 | 0.006737494 | 0.585024603  |
| C4orf46     | METTL1 | 0.003719515 | 0.617511217  |
| PDE7A       | METTL1 | 0.039012643 | 0.464640642  |
| SARNP       | METTL1 | 6.69E-07    | 0.868898385  |
| IPO7        | METTL1 | 0.00858453  | 0.570756094  |
| NAP1L4      | METTL1 | 0.024298086 | 0.501421386  |
| TMSB4X      | METTL1 | 0.023674748 | 0.503334497  |
| TMEM256     | METTL1 | 0.007892145 | 0.575780384  |
| CPT1B       | METTL1 | 0.006495582 | -0.58712418  |
| HMGN1       | METTL1 | 1.90E-04    | 0.740347517  |
| DENND6B     | METTL1 | 4.22E-04    | -0.712590503 |
| LCMT1       | METTL1 | 9.09E-04    | 0.682758703  |
| ADARB2-AS1  | METTL1 | 0.004362826 | 0.609116421  |
| ITSN1       | METTL1 | 0.024681817 | -0.500262893 |
| ITPRIPL2    | METTL1 | 0.014511496 | -0.537535004 |
| LINC00487   | METTL1 | 0.003956147 | 0.614292867  |
| TTC23L      | METTL1 | 0.006347914 | 0.58843754   |
| NANOGNB     | METTL1 | 4.39E-04    | 0.711179363  |
| ZNF316      | METTL1 | 0.012491533 | -0.547361478 |
| ONECUT3     | METTL1 | 0.005321559 | 0.598332846  |
| OLIG2       | METTL1 | 0.028932637 | -0.488295717 |
| HSP90AB2P   | METTL1 | 2.05E-04    | 0.737787528  |
| NYNRIN      | METTL1 | 0.012103045 | -0.549396693 |
| DNAJC19     | METTL1 | 2.62E-04    | 0.729487834  |
| DEFA1       | METTL1 | 1.97E-04    | 0.739023868  |
| TMEM211     | METTL1 | 0.005355774 | -0.59797864  |
| SERPINB5    | METTL1 | 2.08E-04    | 0.737245719  |
| HNRNPA1P4   | METTL1 | 0.017708675 | 0.524027322  |
| B3GALT4     | METTL1 | 0.010131433 | -0.560625583 |
| VPS52       | METTL1 | 0.044911899 | 0.452939094  |
| HLA-H       | METTL1 | 0.016252875 | 0.529912215  |
| RAB12       | METTL1 | 0.0179443   | 0.523111571  |
| HLA-A       | METTL1 | 0.001165578 | 0.672285343  |
| ANKRD28     | METTL1 | 0.008390499 | 0.572129696  |
| COLQ        | METTL1 | 0.023138726 | -0.505011787 |
| SNORD60     | METTL1 | 3.99E-05    | 0.785966156  |
| SNORD116-17 | METTL1 | 8.68E-04    | 0.684651792  |
| SNORD101    | METTL1 | 8.14E-04    | 0.68726888   |
| RNU6-701P   | METTL1 | 9.32E-04    | 0.681718793  |
| SNORA5A     | METTL1 | 9.27E-04    | 0.681942657  |
| SNORA70F    | METTL1 | 0.001175182 | 0.671933031  |
| RNU6-4P     | METTL1 | 1.97E-04    | 0.739023868  |
| SNORD59A    | METTL1 | 6.93E-05    | 0.770961965  |
| SNORD116-13 | METTL1 | 0.001871569 | 0.651179123  |
| SNORD116-15 | METTL1 | 1.97E-04    | 0.739023868  |
| SNORD116-5  | METTL1 | 5.50E-06    | 0.8316513    |
| RNU6-83P    | METTL1 | 0.019075927 | 0.518842883  |
| SNORD15B    | METTL1 | 0.002371882 | 0.639997576  |
| SNORD116-19 | METTL1 | 0.001261281 | 0.668878179  |
| SNORA19     | METTL1 | 0.024241745 | 0.5015927    |
| MIR25       | METTL1 | 5.86E-05    | 0.775656415  |
| MIR649      | METTL1 | 0.01530343  | 0.533982106  |
| MIR93       | METTL1 | 0.016268913 | 0.529845123  |
| MIR550A1    | METTL1 | 0.03986826  | -0.462862113 |

|           |        |             |              |
|-----------|--------|-------------|--------------|
| MIR223    | METTL1 | 0.033361743 | -0.47721679  |
| MIR30C1   | METTL1 | 0.040670437 | 0.461221324  |
| MIR23A    | METTL1 | 0.035488533 | -0.472301905 |
| MIR320A   | METTL1 | 0.049691797 | 0.444298299  |
| SNORD78   | METTL1 | 2.75E-05    | 0.795508473  |
| MT-TL1    | METTL1 | 0.035205759 | 0.472941912  |
| SNORD83A  | METTL1 | 0.029072544 | 0.487926056  |
| MT-RNR2   | METTL1 | 0.027307602 | -0.492695805 |
| MT-TM     | METTL1 | 0.049709783 | 0.444267015  |
| MT-TA     | METTL1 | 0.005324935 | 0.59829781   |
| MT-TN     | METTL1 | 0.033705641 | 0.476405803  |
| MT-TC     | METTL1 | 0.035597551 | 0.472056223  |
| MT-TY     | METTL1 | 0.018535425 | 0.520855767  |
| MT-TS1    | METTL1 | 0.02681845  | 0.494060592  |
| MT-TK     | METTL1 | 5.50E-06    | 0.8316513    |
| MT-TE     | METTL1 | 0.008588902 | 0.57072544   |
| GNRHR2    | METTL1 | 7.95E-04    | 0.688213094  |
| AKR7L     | METTL1 | 0.001363664 | 0.665466144  |
| MT-RNR1   | METTL1 | 0.035310123 | -0.472705238 |
| TSN       | METTL1 | 1.12E-04    | 0.757020365  |
| IGKJ3     | METTL1 | 0.00996804  | 0.561633634  |
| IGKV5-2   | METTL1 | 0.028576624 | 0.489242744  |
| IGKV3D-20 | METTL1 | 0.032644889 | 0.478928511  |
| IGKV3D-11 | METTL1 | 0.032475297 | 0.479337759  |
| IGLV4-69  | METTL1 | 0.011385671 | 0.553298015  |
| IGLV4-60  | METTL1 | 3.47E-05    | 0.789629873  |
| IGLV10-54 | METTL1 | 0.015603369 | 0.532674998  |
| IGLV1-51  | METTL1 | 3.46E-05    | 0.78973416   |
| IGLV1-50  | METTL1 | 0.013080052 | 0.544373642  |
| IGLV5-45  | METTL1 | 0.004626619 | 0.605968372  |
| IGLV7-43  | METTL1 | 0.00576633  | 0.593867463  |
| IGLV5-37  | METTL1 | 0.001061595 | 0.676265553  |
| IGLV2-33  | METTL1 | 1.97E-04    | 0.739023868  |
| IGLV3-19  | METTL1 | 0.001544151 | 0.65994358   |
| IGLV3-16  | METTL1 | 0.020721147 | 0.512983649  |
| IGLV4-3   | METTL1 | 0.014112458 | 0.539384677  |
| TRBV4-1   | METTL1 | 0.010834326 | 0.556434076  |
| TRBV6-6   | METTL1 | 2.67E-04    | 0.728840967  |
| TRBV5-5   | METTL1 | 0.025990197 | 0.496416919  |
| TRBV5-6   | METTL1 | 0.0173109   | 0.52559562   |
| TRBV5-1   | METTL1 | 3.91E-04    | 0.715373789  |
| TRBV4-2   | METTL1 | 0.03404565  | 0.47561031   |
| TRBV19    | METTL1 | 8.86E-04    | 0.683795881  |
| TRBV20-1  | METTL1 | 0.009568842 | 0.564154178  |
| TRBV24-1  | METTL1 | 0.027234066 | 0.492899743  |
| TRBV25-1  | METTL1 | 0.003288795 | 0.623832732  |
| TRBV27    | METTL1 | 2.69E-05    | 0.796095565  |
| TRBJ2-2P  | METTL1 | 2.94E-04    | 0.725600884  |
| TRBJ2-3   | METTL1 | 1.68E-05    | 0.807411481  |
| TRBJ2-4   | METTL1 | 1.80E-05    | 0.805858423  |
| TRBC2     | METTL1 | 0.00630248  | 0.588846668  |
| TRAV2     | METTL1 | 0.038656041 | 0.465390828  |
| TRAV13-2  | METTL1 | 0.008628239 | 0.570450165  |
| TRAV9-2   | METTL1 | 0.015356005 | 0.533751507  |

|           |        |             |              |
|-----------|--------|-------------|--------------|
| TRAV12-3  | METTL1 | 0.008033727 | 0.574724515  |
| TRAV16    | METTL1 | 0.047069883 | 0.44895473   |
| TRAV19    | METTL1 | 0.019063299 | 0.518889388  |
| TRAV21    | METTL1 | 0.012180456 | 0.548986981  |
| TRAV23DV6 | METTL1 | 0.013248884 | 0.543536563  |
| TRAV27    | METTL1 | 0.008980776 | 0.568027803  |
| TRAV29DV5 | METTL1 | 3.74E-04    | 0.716984711  |
| TRAV35    | METTL1 | 0.013076553 | 0.544391083  |
| TRAV39    | METTL1 | 8.12E-04    | 0.687351959  |
| TRAV41    | METTL1 | 0.038075623 | 0.466623421  |
| IGHD      | METTL1 | 0.03016952  | 0.485075047  |
| IGHM      | METTL1 | 0.001562364 | 0.659416896  |
| IGHJ6     | METTL1 | 0.033818225 | 0.476141708  |
| IGHD5-12  | METTL1 | 0.012099581 | 0.549415075  |
| IGHV1-2   | METTL1 | 0.006757465 | 0.584854048  |
| IGHV1-3   | METTL1 | 0.044316303 | 0.454064655  |
| IGHV3-7   | METTL1 | 0.020273057 | 0.514541639  |
| IGHV3-11  | METTL1 | 0.030074158 | 0.485319631  |
| IGHV3-13  | METTL1 | 0.001384648 | 0.664793552  |
| IGHV3-21  | METTL1 | 0.005764089 | 0.59388924   |
| IGHV3-30  | METTL1 | 0.034297443 | 0.475025197  |
| IGHV3-38  | METTL1 | 3.55E-04    | 0.718914971  |
| IGHV3-48  | METTL1 | 0.009412841 | 0.565162456  |
| IGHV3-49  | METTL1 | 0.009703523 | 0.563294403  |
| IGHV3-73  | METTL1 | 0.005258598 | 0.598989563  |
| IGHV7-81  | METTL1 | 0.022739168 | 0.506282208  |
| SNORD91A  | METTL1 | 0.047115675 | -0.448871719 |
| SNORD17   | METTL1 | 0.019955938 | 0.515660899  |
| SNORD19   | METTL1 | 0.020683291 | 0.513114228  |
| RNA5SP354 | METTL1 | 0.005575228 | 0.59575007   |
| SNORA26   | METTL1 | 7.50E-04    | 0.690563145  |
| RNU6-876P | METTL1 | 1.97E-04    | 0.739023868  |
| SNORA45   | METTL1 | 4.72E-04    | 0.708474095  |
| C17orf100 | METTL1 | 0.002852829 | 0.630975045  |
| HMG2P8    | METTL1 | 0.044628711 | 0.453472822  |
| RNF208    | METTL1 | 0.044165762 | -0.454350991 |
| RPS26P6   | METTL1 | 0.003643358 | 0.618583103  |
| COX20P1   | METTL1 | 0.002014197 | 0.647759023  |
| AURKAPS1  | METTL1 | 0.037348275 | 0.4681888    |
| SCAF8     | METTL1 | 0.020305254 | 0.514428782  |
| PDCL3P5   | METTL1 | 1.23E-04    | 0.753946184  |
| ZNF254    | METTL1 | 0.037309715 | 0.468272447  |
| TCTEX1D2  | METTL1 | 6.36E-04    | 0.697084174  |
| RPL12P38  | METTL1 | 0.007556557 | 0.578346321  |
| EEF1A1P16 | METTL1 | 2.63E-04    | 0.729445987  |
| NRAS      | METTL1 | 0.003236265 | 0.624650031  |
| QTRT1     | METTL1 | 6.10E-04    | 0.698689144  |
| RPS3P6    | METTL1 | 5.84E-04    | 0.700388437  |
| YBX2P1    | METTL1 | 0.037821797 | -0.46716704  |
| H2AFZP1   | METTL1 | 0.024669061 | -0.500301175 |
| SIPA1     | METTL1 | 0.029419636 | -0.487014973 |
| SYNJ2BP   | METTL1 | 0.025307538 | 0.498404001  |
| NT5C3AP1  | METTL1 | 5.81E-04    | 0.700574739  |
| GBP7      | METTL1 | 0.027452168 | 0.492296139  |

|            |        |             |              |
|------------|--------|-------------|--------------|
| RBMXL1     | METTL1 | 2.33E-04    | 0.733452748  |
| DNAJC9     | METTL1 | 3.69E-05    | 0.788066146  |
| RPLP0P6    | METTL1 | 0.002542478 | 0.636635824  |
| C8orf82    | METTL1 | 0.007931695 | -0.575483883 |
| ZBTB9      | METTL1 | 0.002992324 | 0.628596455  |
| TMX2       | METTL1 | 0.018181023 | 0.522201178  |
| LEPROT     | METTL1 | 4.36E-04    | -0.711403914 |
| ADAT3      | METTL1 | 0.007756374 | -0.576807551 |
| SLC35F6    | METTL1 | 0.001533169 | -0.660263686 |
| PIGCP1     | METTL1 | 0.010052277 | -0.561112271 |
| FAM209B    | METTL1 | 0.04933395  | 0.444922553  |
| RPS29      | METTL1 | 3.96E-04    | 0.714981514  |
| CENPBD1P1  | METTL1 | 0.043868649 | -0.45491833  |
| ZNF134     | METTL1 | 2.79E-04    | 0.727415688  |
| GTF2H4     | METTL1 | 0.010118597 | 0.560704292  |
| PSMC1P2    | METTL1 | 9.86E-04    | 0.679373089  |
| DDX47      | METTL1 | 0.003944141 | 0.614452266  |
| ZNF845     | METTL1 | 0.003881982 | 0.615283995  |
| EEF1B2P2   | METTL1 | 1.97E-04    | 0.739023868  |
| YBX1P10    | METTL1 | 1.37E-05    | 0.812124578  |
| NPM1P6     | METTL1 | 6.68E-04    | 0.695186986  |
| RPL13AP7   | METTL1 | 0.016814764 | 0.527592666  |
| LTB4R      | METTL1 | 0.003567324 | -0.619671961 |
| LTB4R2     | METTL1 | 0.011813483 | -0.550948299 |
| GALT       | METTL1 | 0.009681671 | 0.563433235  |
| RPS10P2    | METTL1 | 1.97E-04    | 0.739023868  |
| NUDT19     | METTL1 | 0.001558549 | -0.65952681  |
| ZNF726     | METTL1 | 0.038583795 | 0.465543466  |
| PGAM1P7    | METTL1 | 0.003384566 | 0.622370157  |
| RRM2P3     | METTL1 | 0.003036147 | -0.62786825  |
| SMIM7      | METTL1 | 0.04989713  | -0.443941654 |
| TSPAN4     | METTL1 | 0.014192969 | -0.539008122 |
| CPNE1      | METTL1 | 0.017271869 | 0.525751056  |
| PAXIP1-AS2 | METTL1 | 0.028439054 | 0.489611176  |
| TPT1P5     | METTL1 | 0.011301109 | 0.553770901  |
| LDHAP4     | METTL1 | 0.02547503  | 0.497912584  |
| LYRM4      | METTL1 | 0.001715039 | 0.655193597  |
| PTMAP5     | METTL1 | 1.71E-04    | 0.74376943   |
| EEF1A1P12  | METTL1 | 0.002443431 | 0.638563848  |
| HNRNPA1P43 | METTL1 | 1.97E-04    | 0.739023868  |
| C19orf38   | METTL1 | 0.003109672 | -0.6266659   |
| C12orf74   | METTL1 | 0.013431504 | 0.542640753  |
| FIS1       | METTL1 | 3.37E-05    | 0.790344556  |
| RPSAP53    | METTL1 | 8.12E-05    | 0.766405368  |
| SPDYE3     | METTL1 | 0.033527493 | 0.476825104  |
| HAUS3      | METTL1 | 7.31E-05    | 0.769409044  |
| LCNL1      | METTL1 | 0.026126806 | -0.496024234 |
| NOTO       | METTL1 | 4.36E-06    | 0.836285118  |
| RPS15AP1   | METTL1 | 9.65E-04    | 0.680286423  |
| RPS4XP3    | METTL1 | 5.50E-06    | 0.8316513    |
| C17orf98   | METTL1 | 0.006498617 | 0.587097437  |
| RPSAP6     | METTL1 | 0.036370604 | 0.470330681  |
| ZSWIM8     | METTL1 | 0.018513878 | -0.520936976 |
| IFRD2      | METTL1 | 0.002521019 | 0.63704816   |

|              |        |             |              |
|--------------|--------|-------------|--------------|
| HNRNPUL2     | METTL1 | 0.001718983 | 0.655088738  |
| MTCP1        | METTL1 | 0.014982263 | 0.535404737  |
| UPF3AP2      | METTL1 | 7.29E-04    | 0.691696537  |
| APOC1P1      | METTL1 | 0.004779488 | 0.604211341  |
| OR7E5P       | METTL1 | 1.97E-04    | 0.739023868  |
| ZSWIM7       | METTL1 | 8.39E-04    | 0.686027408  |
| DNAJA1P3     | METTL1 | 1.97E-04    | 0.739023868  |
| PHB2         | METTL1 | 0.034831894 | 0.473794264  |
| TTC3P1       | METTL1 | 0.006245159 | 0.589366318  |
| UBXN2B       | METTL1 | 0.031093292 | -0.482736595 |
| YWHAZP6      | METTL1 | 0.023135105 | 0.505023223  |
| FASTKD5      | METTL1 | 0.032753199 | 0.478668015  |
| DDX3X        | METTL1 | 0.008993938 | 0.567938878  |
| MYL5         | METTL1 | 0.022975025 | -0.505530166 |
| ZNF407       | METTL1 | 4.35E-04    | 0.711491427  |
| NPEPL1       | METTL1 | 0.049981071 | -0.44379618  |
| HNRNPA1P7    | METTL1 | 0.007510552 | 0.578705307  |
| TMEM242      | METTL1 | 0.001102373 | 0.674667083  |
| TNFRSF25     | METTL1 | 0.021470406 | 0.510437368  |
| TSTD1        | METTL1 | 3.64E-05    | 0.788392926  |
| NBPF7        | METTL1 | 0.007669044 | 0.577476034  |
| MMP23A       | METTL1 | 0.010428752 | -0.558824671 |
| RPL10P1      | METTL1 | 0.00121583  | 0.670468138  |
| HMGB1P17     | METTL1 | 5.50E-06    | 0.8316513    |
| ADAMTS7P4    | METTL1 | 0.003284804 | 0.623894438  |
| MORF4L1P1    | METTL1 | 0.032442782 | 0.479416413  |
| HNRNPA1P1    | METTL1 | 0.041398786 | 0.459753096  |
| RAET1K       | METTL1 | 0.021619538 | 0.509939011  |
| GAPDHP63     | METTL1 | 1.97E-04    | 0.739023868  |
| ZNF579       | METTL1 | 0.029091441 | -0.487876234 |
| IGKV1OR2-118 | METTL1 | 0.014399233 | -0.5380512   |
| HNRNPA3P12   | METTL1 | 0.045838435 | 0.45121075   |
| HMGB1P20     | METTL1 | 0.020098462 | 0.515156125  |
| RPS20P2      | METTL1 | 0.040969826 | 0.460615363  |
| NBPF1        | METTL1 | 0.018376327 | 0.521457183  |
| PPIAP9       | METTL1 | 4.80E-05    | 0.781099375  |
| ZSCAN12P1    | METTL1 | 0.047313341 | 0.448514096  |
| RPL12P8      | METTL1 | 0.002147213 | 0.644747387  |
| RPL21P28     | METTL1 | 0.013800677 | 0.540859416  |
| RNU6ATAC7P   | METTL1 | 0.018261525 | 0.521893745  |
| SNORD99      | METTL1 | 0.001746731 | 0.654356709  |
| MIR1225      | METTL1 | 2.60E-04    | 0.729841339  |
| SNORA11      | METTL1 | 0.027992467 | 0.490816946  |
| EBF2         | METTL1 | 0.011301107 | 0.553770907  |
| CEBPD        | METTL1 | 0.005053217 | -0.601177855 |
| ARIH2OS      | METTL1 | 0.037914938 | 0.466967231  |
| PPP2R2A      | METTL1 | 0.004953192 | 0.60227025   |
| ZNF880       | METTL1 | 0.04234183  | 0.457881456  |
| TIGD1        | METTL1 | 0.011986873 | 0.550015549  |
| FADS3        | METTL1 | 0.019777092 | 0.516298392  |
| TTC4P1       | METTL1 | 0.03194641  | 0.480624856  |
| UBA52        | METTL1 | 3.47E-04    | 0.719707722  |
| ZNF630       | METTL1 | 0.003695056 | 0.61785347   |
| RAB6C        | METTL1 | 0.04043954  | 0.461691019  |

|              |        |             |              |
|--------------|--------|-------------|--------------|
| RNU4-62P     | METTL1 | 0.043460172 | -0.455703173 |
| RN7SKP110    | METTL1 | 0.032817179 | 0.478514453  |
| RNA5SP115    | METTL1 | 5.67E-04    | 0.701524551  |
| RN7SKP252    | METTL1 | 0.006330737 | 0.588591935  |
| RNU6-1199P   | METTL1 | 0.007092913 | 0.582049298  |
| RNA5SP221    | METTL1 | 3.81E-05    | 0.787197899  |
| RNU6-195P    | METTL1 | 0.00907493  | -0.567393981 |
| RNY3P8       | METTL1 | 1.13E-05    | 0.816521488  |
| RN7SKP273    | METTL1 | 0.029578589 | 0.486600552  |
| RNU2-6P      | METTL1 | 0.032759557 | 0.478652744  |
| IGLV9-49     | METTL1 | 0.001341318 | 0.666191995  |
| HLA-U        | METTL1 | 0.006359257 | 0.588335768  |
| FBXW7        | METTL1 | 0.001434834 | 0.663219098  |
| DDR1-AS1     | METTL1 | 0.043167429 | 0.456269153  |
| KIF28P       | METTL1 | 0.021370423 | -0.510773024 |
| EEF1A1P8     | METTL1 | 0.011380339 | 0.553327745  |
| ZNF844       | METTL1 | 0.007758874 | 0.576788503  |
| TMSB4XP4     | METTL1 | 0.033262124 | 0.477452933  |
| TVP23CP1     | METTL1 | 0.003625188 | 0.618841595  |
| AK4P4        | METTL1 | 0.011524867 | 0.552525759  |
| LINC01044    | METTL1 | 0.004779488 | 0.604211341  |
| IGHV3-64     | METTL1 | 1.25E-04    | 0.753616339  |
| EEF1A1P24    | METTL1 | 0.022299967 | 0.507699264  |
| MED15P9      | METTL1 | 0.00225544  | 0.642409982  |
| ENTPD3-AS1   | METTL1 | 0.004851839 | 0.603395879  |
| RPS20P14     | METTL1 | 0.003403394 | 0.622086672  |
| EEF1A1P1     | METTL1 | 0.03150331  | 0.481716085  |
| TRIM26BP     | METTL1 | 0.006234827 | 0.589460402  |
| NBEAP3       | METTL1 | 1.97E-04    | 0.739023868  |
| ASS1P2       | METTL1 | 0.013889292 | -0.540437556 |
| RPL3P2       | METTL1 | 0.004078397 | 0.612692221  |
| EPB41L4A-AS1 | METTL1 | 4.99E-04    | 0.706369966  |
| SNHG14       | METTL1 | 0.002377385 | 0.639886019  |
| RPS24P8      | METTL1 | 0.007127456 | 0.581766693  |
| HCG20        | METTL1 | 0.025338944 | -0.498311663 |
| ASH2LP1      | METTL1 | 0.004164094 | 0.611593694  |
| DNAJC27-AS1  | METTL1 | 0.015574196 | 0.532801243  |
| PHEX-AS1     | METTL1 | 1.97E-04    | 0.739023868  |
| LINC00466    | METTL1 | 1.97E-04    | 0.739023868  |
| WARS2-IT1    | METTL1 | 0.005991874 | 0.591710478  |
| ANKRD30BP2   | METTL1 | 0.021924395 | 0.508928702  |
| CDKN2AIPNLP3 | METTL1 | 1.97E-04    | 0.739023868  |
| OACYLP       | METTL1 | 0.014983847 | 0.53539766   |
| IGHV4-59     | METTL1 | 0.015280303 | 0.534083743  |
| LINC00572    | METTL1 | 1.97E-04    | 0.739023868  |
| STK24-AS1    | METTL1 | 0.003343288 | -0.622996267 |
| HLA-K        | METTL1 | 0.005581764 | 0.595684807  |
| PPIAP10      | METTL1 | 1.96E-04    | 0.739220571  |
| EIF4BP3      | METTL1 | 0.001874141 | 0.651115545  |
| LINC01087    | METTL1 | 0.004779487 | 0.604211344  |
| LPP-AS1      | METTL1 | 0.013417819 | 0.542707537  |
| FAM96AP2     | METTL1 | 0.004232831 | 0.610726008  |
| HNRNPA1P48   | METTL1 | 1.91E-05    | 0.804375186  |
| BMS1P12      | METTL1 | 0.027768632 | 0.491426998  |



|              |        |             |              |
|--------------|--------|-------------|--------------|
| HCG18        | METTL1 | 0.009232693 | 0.566343859  |
| IGHV3-74     | METTL1 | 0.035744592 | 0.471725781  |
| EIF3EP2      | METTL1 | 6.96E-05    | 0.77082713   |
| NPIPA3       | METTL1 | 0.004362826 | 0.609116422  |
| LINC00265-2P | METTL1 | 1.09E-05    | 0.817201174  |
| OR2X1P       | METTL1 | 0.031502819 | 0.481717301  |
| MTND5P24     | METTL1 | 0.0166271   | 0.528360365  |
| LINC00863    | METTL1 | 0.007122568 | -0.581806615 |
| LINC00184    | METTL1 | 0.011015952 | 0.555386977  |
| KCNC4-AS1    | METTL1 | 0.019122144 | 0.518672889  |
| EIF4BP7      | METTL1 | 0.039461845 | 0.463703181  |
| HMGB3P22     | METTL1 | 3.54E-04    | 0.718948105  |
| SETP20       | METTL1 | 0.049768805 | 0.444164411  |
| OR52K3P      | METTL1 | 0.01463188  | -0.536985022 |
| PSME2P2      | METTL1 | 0.002975829 | 0.628872847  |
| AATK-AS1     | METTL1 | 0.003349848 | 0.62289633   |
| PLEKHM1      | METTL1 | 0.001463143 | -0.662351267 |
| HSPA7        | METTL1 | 0.03055373  | -0.484095727 |
| ZNRF2P2      | METTL1 | 0.035491292 | -0.472295679 |
| RAB6C-AS1    | METTL1 | 1.50E-04    | 0.747778633  |
| ZNF70P1      | METTL1 | 0.012517155 | 0.547229054  |
| JPX          | METTL1 | 0.001527733 | 0.660422825  |
| IGKV6D-21    | METTL1 | 0.010226483 | 0.560045235  |
| RPL35P5      | METTL1 | 4.21E-04    | 0.712673068  |
| ZNF469       | METTL1 | 0.003844072 | -0.615796679 |
| SBDSP1       | METTL1 | 0.003642769 | 0.618591478  |
| HNRNPA1P35   | METTL1 | 0.022648841 | 0.506571859  |
| SLC26A6      | METTL1 | 2.21E-04    | -0.735200148 |
| LINC00694    | METTL1 | 0.032210622 | -0.479979806 |
| MTND1P23     | METTL1 | 0.009265692 | 0.56612606   |
| PPIAP21      | METTL1 | 5.50E-06    | 0.8316513    |
| LINC00937    | METTL1 | 0.037900116 | -0.466999002 |
| BAIAP2-AS1   | METTL1 | 0.014265056 | -0.538672422 |
| TRGV6        | METTL1 | 0.007458992 | -0.579109777 |
| RPL37AP1     | METTL1 | 0.043332961 | -0.455948756 |
| C12orf77     | METTL1 | 0.02132866  | 0.510913598  |
| TPI1P1       | METTL1 | 0.011571331 | 0.552269663  |
| SLC16A1-AS1  | METTL1 | 0.013010663 | 0.54472021   |
| FTOP1        | METTL1 | 0.018389056 | -0.521408912 |
| RPS7P10      | METTL1 | 1.97E-04    | 0.739023868  |
| RPL7P37      | METTL1 | 1.97E-04    | 0.739023868  |
| TRBV2        | METTL1 | 0.003005375 | 0.628378654  |
| PWWP2AP1     | METTL1 | 0.018556656 | 0.520775822  |
| MICD         | METTL1 | 0.01963142  | 0.51682104   |
| PSMD5-AS1    | METTL1 | 8.20E-04    | 0.686986741  |
| HNRNPA3P1    | METTL1 | 2.16E-06    | 0.849383256  |
| CT45A6       | METTL1 | 0.016988015 | 0.526889999  |
| ALG1L5P      | METTL1 | 6.09E-04    | 0.698779147  |
| DANCR        | METTL1 | 0.024273468 | 0.501496202  |
| IL6STP1      | METTL1 | 1.97E-04    | 0.739023868  |
| RPL41P1      | METTL1 | 2.37E-04    | 0.732891245  |
| ST7-AS1      | METTL1 | 0.022139383 | -0.50822291  |
| ELL2P1       | METTL1 | 0.009860671 | -0.562303374 |
| IGHJ1P       | METTL1 | 0.004726713 | 0.604812601  |

|            |        |             |              |
|------------|--------|-------------|--------------|
| RBM26-AS1  | METTL1 | 0.011981969 | 0.550041779  |
| HPN-AS1    | METTL1 | 0.027586788 | 0.491925457  |
| SCAMP4     | METTL1 | 0.015439518 | -0.533386519 |
| RPL7P6     | METTL1 | 0.012288876 | 0.548416671  |
| RPS3AP53   | METTL1 | 0.03827518  | 0.466198     |
| CLYBL-AS2  | METTL1 | 0.046602308 | 0.449805929  |
| CYCSP24    | METTL1 | 0.001523714 | -0.660540823 |
| LINC00355  | METTL1 | 2.19E-04    | 0.735570826  |
| RD3L       | METTL1 | 0.035068671 | -0.473253629 |
| SLC9A7P1   | METTL1 | 0.037147784 | -0.468624453 |
| RPS26P13   | METTL1 | 1.09E-05    | 0.817201174  |
| NPM1P22    | METTL1 | 1.97E-04    | 0.739023868  |
| TOP3BP1    | METTL1 | 0.003948287 | 0.614397171  |
| RPL7P47    | METTL1 | 7.08E-04    | 0.692889644  |
| IFNA14     | METTL1 | 0.012311158 | 0.54829997   |
| HNRNPA1P21 | METTL1 | 0.011386606 | 0.5532928    |
| ORM2       | METTL1 | 0.006465739 | -0.587387612 |
| ITPKB-IT1  | METTL1 | 4.63E-04    | 0.709157684  |
| LINC00687  | METTL1 | 1.97E-04    | 0.739023868  |
| OST4       | METTL1 | 0.005118805 | 0.600471186  |
| GRK5-IT1   | METTL1 | 2.73E-04    | 0.728096611  |
| LINC01013  | METTL1 | 2.59E-04    | 0.729933851  |
| RPL15P18   | METTL1 | 8.70E-05    | 0.764391984  |
| EEF1A1P11  | METTL1 | 0.010389904 | 0.559057598  |
| HK2P1      | METTL1 | 0.002186273 | 0.643892671  |
| DHFR       | METTL1 | 0.015662977 | 0.532417642  |
| LINC01128  | METTL1 | 1.08E-04    | 0.758075105  |
| MTND1P9    | METTL1 | 0.006518318 | 0.586924142  |
| DUTP1      | METTL1 | 0.016444197 | 0.529115295  |
| PSMA6P2    | METTL1 | 0.00726316  | 0.580667183  |
| ANKRD20A8P | METTL1 | 0.014162265 | 0.53915152   |
| RPL41      | METTL1 | 1.07E-05    | 0.817686087  |
| TRAC       | METTL1 | 0.023348821 | 0.504350738  |
| TRBV7-8    | METTL1 | 0.00506783  | 0.601019749  |
| LINC00242  | METTL1 | 9.80E-05    | 0.760896333  |
| TUBB8P1    | METTL1 | 0.037280025 | 0.468336898  |
| ORM1       | METTL1 | 0.034383147 | -0.474826805 |
| HYI-AS1    | METTL1 | 0.014524679 | 0.537474598  |
| DPY19L1P1  | METTL1 | 0.009002209 | 0.567883046  |
| LINC00452  | METTL1 | 0.003587172 | 0.619385884  |
| NPM1P25    | METTL1 | 0.002862453 | 0.630807863  |
| HNRNPA1P53 | METTL1 | 4.02E-04    | 0.714363358  |
| RPL4P4     | METTL1 | 0.004004336 | 0.613657099  |
| ZNF492     | METTL1 | 5.18E-04    | 0.70501095   |
| EEF1DP3    | METTL1 | 0.017160846 | -0.526194731 |
| SLC25A38P1 | METTL1 | 8.36E-05    | 0.765574374  |
| RPS15P5    | METTL1 | 4.36E-06    | 0.836285118  |
| PET100     | METTL1 | 0.00404458  | 0.613130976  |
| KHSRPP1    | METTL1 | 5.50E-06    | 0.831651301  |
| OGFR-AS1   | METTL1 | 0.016052606 | -0.5307545   |
| RHEBP1     | METTL1 | 0.038621605 | -0.465463554 |
| UBBP1      | METTL1 | 0.006090336 | 0.590789716  |
| ATP5G1P1   | METTL1 | 5.95E-04    | 0.699662305  |
| RPL4P5     | METTL1 | 0.001684716 | 0.656006563  |

|             |        |             |              |
|-------------|--------|-------------|--------------|
| HERC2P4     | METTL1 | 0.039156241 | -0.464340054 |
| ARMC2-AS1   | METTL1 | 0.028753465 | 0.488771178  |
| RPL4P3      | METTL1 | 0.015431689 | 0.53342067   |
| FAM41C      | METTL1 | 0.003310356 | 0.623500403  |
| LIMD1-AS1   | METTL1 | 0.00727413  | 0.58057904   |
| RPSAP8      | METTL1 | 2.43E-04    | 0.732141027  |
| RPS23P8     | METTL1 | 5.73E-04    | 0.701132708  |
| RGPD4-AS1   | METTL1 | 2.43E-04    | 0.732039735  |
| CEACAM22P   | METTL1 | 0.004394122 | 0.608734854  |
| ENO1-AS1    | METTL1 | 0.027420673 | 0.492383068  |
| VN1R108P    | METTL1 | 0.047104799 | 0.448891428  |
| STMND1      | METTL1 | 0.025611071 | 0.497515317  |
| RPL9P8      | METTL1 | 0.036833311 | 0.469311476  |
| TPT1P7      | METTL1 | 5.50E-06    | 0.8316513    |
| PRDX3P2     | METTL1 | 0.036758933 | -0.469474635 |
| LINC00441   | METTL1 | 0.003596342 | 0.619254152  |
| DIRC3       | METTL1 | 0.033048716 | 0.477960673  |
| LINC00574   | METTL1 | 1.99E-06    | 0.850848427  |
| DBIL5P      | METTL1 | 0.019909397 | 0.515826355  |
| PPP1R2P3    | METTL1 | 0.001328642 | 0.666608279  |
| CAP1P2      | METTL1 | 4.19E-04    | 0.712877064  |
| LINC01063   | METTL1 | 0.021155624 | -0.511498378 |
| PNLIPP1     | METTL1 | 1.97E-04    | 0.739023868  |
| TMA7        | METTL1 | 0.002153671 | 0.64460518   |
| DYTN        | METTL1 | 0.02514551  | -0.498881838 |
| MTND4P24    | METTL1 | 0.027960381 | 0.490904159  |
| IGHV3-43    | METTL1 | 0.032643676 | 0.478931433  |
| RPL4P2      | METTL1 | 0.007631175 | 0.577767849  |
| C9orf172    | METTL1 | 0.036382557 | -0.470304226 |
| EEF1B2P3    | METTL1 | 5.43E-05    | 0.777737671  |
| OSBPL10-AS1 | METTL1 | 0.008759227 | 0.569540856  |
| GOLGA8N     | METTL1 | 0.001648138 | -0.657003718 |
| SPTLC1P4    | METTL1 | 0.042457371 | 0.457654365  |
| NUTM2HP     | METTL1 | 0.049004098 | 0.445501052  |
| PET117      | METTL1 | 0.013207841 | 0.543739262  |
| LYRM9       | METTL1 | 0.014087634 | 0.53950113   |
| SNHG15      | METTL1 | 2.52E-04    | 0.730854595  |
| FAM157B     | METTL1 | 0.031129476 | -0.482646114 |
| SNHG7       | METTL1 | 0.046654296 | 0.449710964  |
| EEF1A1P14   | METTL1 | 0.001647326 | 0.657026062  |
| LINC00884   | METTL1 | 0.048117774 | 0.447070417  |
| OR7E157P    | METTL1 | 0.005166748 | 0.599959339  |
| GPX1        | METTL1 | 5.17E-04    | -0.705075532 |
| NKAPP1      | METTL1 | 0.041407353 | 0.459735945  |
| HOTAIRM1    | METTL1 | 0.002208772 | -0.643406136 |
| EEF1A1P6    | METTL1 | 6.12E-04    | 0.698602589  |
| SRGAP2-AS1  | METTL1 | 0.047933955 | -0.447398666 |
| DCUN1D2-AS  | METTL1 | 0.003494843 | -0.620728013 |
| ZNF90P3     | METTL1 | 1.97E-04    | 0.739023868  |
| ENOX1-AS1   | METTL1 | 1.97E-04    | 0.739023868  |
| EIF4HP1     | METTL1 | 0.03902954  | 0.464605226  |
| ADH5P4      | METTL1 | 5.50E-04    | 0.702673399  |
| RPS15AP40   | METTL1 | 5.89E-05    | 0.775506012  |
| RPS28       | METTL1 | 0.003285118 | 0.623889577  |

|                |        |             |              |
|----------------|--------|-------------|--------------|
| RPS20P10       | METTL1 | 0.011301109 | 0.5537709    |
| RPSAP14        | METTL1 | 0.003193429 | 0.62532469   |
| GDI2P2         | METTL1 | 3.29E-04    | 0.721634776  |
| PAGE2          | METTL1 | 4.62E-04    | 0.709310698  |
| TPT1P1         | METTL1 | 2.60E-04    | 0.729841339  |
| RPL7P13        | METTL1 | 0.011301109 | 0.553770901  |
| BCAS2P2        | METTL1 | 0.004007915 | 0.613610127  |
| JAZF1-AS1      | METTL1 | 0.04102348  | -0.46050713  |
| RNF219-AS1     | METTL1 | 0.023158722 | 0.504948667  |
| RPL5P7         | METTL1 | 0.004698174 | 0.605140069  |
| RPL34-AS1      | METTL1 | 0.002425223 | 0.63892534   |
| FAM133B        | METTL1 | 3.18E-04    | 0.722795826  |
| HSPA8P20       | METTL1 | 1.97E-04    | 0.739023868  |
| RAD1P1         | METTL1 | 0.027165434 | 0.493090471  |
| MAPKAPK5-AS1   | METTL1 | 0.001216763 | 0.670434992  |
| LINC00624      | METTL1 | 0.004088828 | 0.612557503  |
| ACTBP13        | METTL1 | 0.003235621 | 0.624660117  |
| HMGA1P4        | METTL1 | 5.03E-05    | 0.779829206  |
| GAS5           | METTL1 | 1.64E-04    | 0.745016936  |
| TPT1P9         | METTL1 | 0.008276546 | 0.572948527  |
| MORF4          | METTL1 | 6.13E-04    | 0.698514016  |
| HNRNPUL2-BSCL2 | METTL1 | 0.023295424 | 0.504518301  |
| LINC01032      | METTL1 | 0.021324415 | -0.510927901 |
| EIF3EP1        | METTL1 | 0.004169174 | 0.611529163  |
| MIR155HG       | METTL1 | 0.0014936   | 0.661433214  |
| SOX9-AS1       | METTL1 | 0.003933608 | 0.614592439  |
| FTH1P2         | METTL1 | 0.014735246 | 0.53651569   |
| LINC00330      | METTL1 | 0.036327219 | 0.470426762  |
| ZSCAN31        | METTL1 | 0.020390223 | 0.514131631  |
| KRT18P16       | METTL1 | 1.97E-04    | 0.739023868  |
| MCF2L-AS1      | METTL1 | 0.01072544  | 0.557068663  |
| LINC00957      | METTL1 | 8.41E-04    | 0.685957971  |
| DBF4P1         | METTL1 | 7.34E-04    | 0.691425017  |
| SNX19P2        | METTL1 | 1.97E-04    | 0.739023868  |
| RPS2P7         | METTL1 | 0.001698443 | 0.655637032  |
| LINC00402      | METTL1 | 0.001078068 | 0.67561369   |
| NFAM1          | METTL1 | 0.001245417 | -0.669427568 |
| LINC00494      | METTL1 | 0.035991148 | 0.471174065  |
| H3F3AP4        | METTL1 | 0.010743157 | -0.556965051 |
| KIAA0040       | METTL1 | 2.08E-04    | 0.737328725  |
| HSP90AB7P      | METTL1 | 1.97E-04    | 0.739023868  |
| TTC28-AS1      | METTL1 | 0.012015793 | 0.549861039  |
| VN2R19P        | METTL1 | 0.027701995 | 0.491609358  |
| MORC2-AS1      | METTL1 | 1.33E-04    | 0.751682915  |
| HSPB1P1        | METTL1 | 0.012855348 | 0.545501372  |
| ZBED5          | METTL1 | 0.014228513 | 0.538842427  |
| BMP6P1         | METTL1 | 0.043573571 | 0.455484721  |
| RPL5P9         | METTL1 | 0.042656321 | 0.457264452  |
| NRADDP         | METTL1 | 0.049984477 | -0.44379028  |
| PKMP1          | METTL1 | 7.68E-05    | 0.768008001  |
| HNRNPA1P54     | METTL1 | 0.004771642 | 0.604300376  |
| RPL13AP5       | METTL1 | 2.45E-05    | 0.798402237  |
| PITPNA-AS1     | METTL1 | 3.33E-06    | 0.841429701  |
| LINC00347      | METTL1 | 0.004423062 | 0.608383995  |

|            |        |             |              |
|------------|--------|-------------|--------------|
| RPL24P8    | METTL1 | 5.92E-05    | 0.775368496  |
| BCYRN1     | METTL1 | 0.039462059 | 0.463702737  |
| CBR3-AS1   | METTL1 | 0.038651507 | 0.4654004    |
| RPS20P24   | METTL1 | 2.00E-06    | 0.850779902  |
| LINC00106  | METTL1 | 0.003190204 | -0.625375799 |
| DDX11L5    | METTL1 | 0.019372453 | -0.517757855 |
| TMSB4XP1   | METTL1 | 1.97E-04    | 0.739023868  |
| WASF3-AS1  | METTL1 | 1.97E-04    | 0.739023868  |
| PRMT5-AS1  | METTL1 | 0.007031178 | 0.582557195  |
| PCNPP4     | METTL1 | 3.15E-04    | 0.723158115  |
| RPL21P111  | METTL1 | 1.97E-04    | 0.739023868  |
| CDKN2AIPNL | METTL1 | 3.68E-04    | 0.717612928  |
| TRBV30     | METTL1 | 0.002692077 | 0.633839295  |
| FTH1P11    | METTL1 | 0.004103231 | 0.612371935  |
| HSPE1P22   | METTL1 | 0.014855695 | 0.535972119  |
| CDC42P6    | METTL1 | 2.40E-04    | 0.732461153  |
| NRBF2P3    | METTL1 | 0.011403165 | 0.553200537  |
| LINC00959  | METTL1 | 0.014284825 | 0.5385806    |
| RPSAP15    | METTL1 | 2.44E-06    | 0.847255497  |
| LINC00857  | METTL1 | 0.009305614 | 0.565863409  |
| IGHJ2P     | METTL1 | 0.02234444  | 0.507554773  |
| GFOD1-AS1  | METTL1 | 0.024401981 | -0.501106304 |
| RPL18AP16  | METTL1 | 1.97E-04    | 0.739023868  |
| ZEB2-AS1   | METTL1 | 4.14E-04    | -0.71330461  |
| RPL9P7     | METTL1 | 0.014202803 | 0.538962245  |
| GOLGA2P5   | METTL1 | 0.008941266 | 0.568295393  |
| MKRN4P     | METTL1 | 0.010991487 | 0.555527203  |
| RNU7-38P   | METTL1 | 0.006513744 | 0.586964339  |
| SCARNA7    | METTL1 | 0.009153525 | 0.566868988  |
| SCARNA12   | METTL1 | 6.03E-04    | 0.69915605   |
| RPL5P22    | METTL1 | 0.047163629 | 0.448784853  |
| RN7SL546P  | METTL1 | 0.003885611 | 0.615235129  |
| RN7SL184P  | METTL1 | 0.004088828 | 0.612557501  |
| RN7SL425P  | METTL1 | 0.005958876 | 0.592021843  |
| ALKBH6     | METTL1 | 0.026832545 | 0.49402099   |
| HLA-DOB    | METTL1 | 0.001341414 | 0.666188855  |
| RN7SL333P  | METTL1 | 0.049426881 | -0.444760105 |
| MYLK-AS1   | METTL1 | 0.001961923 | 0.64898825   |
| IGKV2D-30  | METTL1 | 0.002923829 | 0.62975259   |
| HLA-L      | METTL1 | 4.47E-04    | 0.710461057  |
| NME1       | METTL1 | 0.001007992 | 0.678447396  |
| TNFSF12    | METTL1 | 0.012561079 | -0.547002554 |
| CEACAMP3   | METTL1 | 0.016446558 | 0.529105509  |
| WBP1       | METTL1 | 0.005060344 | 0.601100698  |
| MRPS17     | METTL1 | 0.022367567 | 0.507479725  |
| RPL21P39   | METTL1 | 6.68E-06    | 0.827681531  |
| IGKV1D-8   | METTL1 | 0.002607969 | 0.635395142  |
| RPS4XP22   | METTL1 | 0.033905966 | 0.475936365  |
| IGKV1-6    | METTL1 | 0.013497856 | 0.542317704  |
| IGKV1-37   | METTL1 | 0.001683985 | 0.656026323  |
| RPP21      | METTL1 | 1.31E-04    | 0.752201443  |
| ADSL       | METTL1 | 0.00583807  | 0.593173967  |
| EGFL8      | METTL1 | 0.036547004 | 0.469940942  |
| LILRA2     | METTL1 | 0.002945994 | -0.62937601  |

|            |        |             |              |
|------------|--------|-------------|--------------|
| CPHL1P     | METTL1 | 0.038055086 | -0.466667298 |
| RPS27P29   | METTL1 | 1.97E-04    | 0.739023868  |
| TCAM1P     | METTL1 | 0.008241817 | 0.573199903  |
| PPIL3      | METTL1 | 0.010070487 | 0.561000034  |
| SETP14     | METTL1 | 0.002066328 | 0.646559437  |
| CDKN2B-AS1 | METTL1 | 0.006436496 | 0.587646717  |
| RN7SL837P  | METTL1 | 0.020401542 | 0.514092122  |
| RPL34P17   | METTL1 | 0.035667971 | 0.471897837  |
| RPL3P9     | METTL1 | 1.97E-04    | 0.739023868  |
| IGKV1-8    | METTL1 | 9.60E-04    | 0.680504955  |
| ISY1       | METTL1 | 1.61E-04    | 0.745529134  |
| IGKV1D-12  | METTL1 | 0.002420486 | 0.639019754  |
| TMEM189    | METTL1 | 0.001939222 | -0.649530618 |
| RDH14      | METTL1 | 1.24E-05    | 0.814308148  |
| IGKV1-16   | METTL1 | 0.043979597 | 0.454706128  |
| NDUFB2-AS1 | METTL1 | 0.008508058 | 0.571294409  |
| NSUN6      | METTL1 | 0.004648442 | 0.605714642  |
| RPL5P1     | METTL1 | 0.004088828 | 0.612557501  |
| YAE1D1     | METTL1 | 3.30E-05    | 0.790884759  |
| RN7SL582P  | METTL1 | 0.004779488 | 0.604211341  |
| IGKV1D-16  | METTL1 | 0.023144067 | 0.504994923  |
| RPL36A     | METTL1 | 0.009874422 | 0.562217273  |
| PDXP       | METTL1 | 0.042844475 | -0.456896988 |
| HNF1A-AS1  | METTL1 | 0.046088331 | 0.450749204  |
| CD302      | METTL1 | 0.005196354 | -0.599645207 |
| ATP5J2     | METTL1 | 0.01946765  | 0.517412325  |
| HSPA8P9    | METTL1 | 0.004779487 | 0.604211342  |
| PSMC1P1    | METTL1 | 0.03692987  | -0.469100042 |
| UGT1A8     | METTL1 | 1.97E-04    | 0.739023868  |
| TRBV11-2   | METTL1 | 0.029363057 | 0.487162909  |
| RPL7AP30   | METTL1 | 3.93E-04    | 0.715181118  |
| ATP5O      | METTL1 | 0.002479272 | 0.637858776  |
| PLEKHO2    | METTL1 | 0.035394288 | -0.472514769 |
| PISD       | METTL1 | 0.023747622 | -0.503108794 |
| HOGA1      | METTL1 | 0.00218012  | 0.644026469  |
| PWP2       | METTL1 | 0.001779272 | 0.65351054   |
| C2orf15    | METTL1 | 0.036426039 | 0.470208045  |
| AKAP2      | METTL1 | 9.12E-07    | 0.864011344  |
| RPS3AP49   | METTL1 | 0.003111649 | 0.626633905  |
| MTFP1      | METTL1 | 7.43E-05    | 0.768968517  |
| SNHG3      | METTL1 | 1.03E-04    | 0.759495984  |
| PSG2       | METTL1 | 0.003822762 | 0.61608672   |
| C22orf39   | METTL1 | 7.83E-04    | 0.68884599   |
| PEG10      | METTL1 | 0.035516331 | 0.472239203  |
| RPL5P3     | METTL1 | 7.02E-04    | 0.693194055  |
| RPL36AP51  | METTL1 | 0.003465859 | 0.621155398  |
| IGKV1-39   | METTL1 | 0.035104788 | 0.473171411  |
| RPL7AP11   | METTL1 | 6.66E-05    | 0.772054332  |
| KIR2DP1    | METTL1 | 0.030410548 | -0.484459551 |
| MRPL20     | METTL1 | 0.021144477 | 0.511536179  |
| IGKV2D-28  | METTL1 | 0.044509885 | 0.453697552  |
| IGKV1D-43  | METTL1 | 5.53E-05    | 0.777259431  |
| GNG10      | METTL1 | 0.043513878 | 0.455599659  |
| RN7SL317P  | METTL1 | 1.97E-04    | 0.739023868  |

|            |        |             |              |
|------------|--------|-------------|--------------|
| RPL5P12    | METTL1 | 5.50E-06    | 0.8316513    |
| TRBV1      | METTL1 | 0.044591126 | 0.453543854  |
| RPL23AP81  | METTL1 | 0.003733542 | 0.617315781  |
| RPS26P21   | METTL1 | 0.004251499 | -0.610492367 |
| RN7SL749P  | METTL1 | 8.11E-04    | 0.687405161  |
| FTH1P23    | METTL1 | 0.017914905 | 0.523225287  |
| IGKV3-7    | METTL1 | 0.003377773 | 0.622472751  |
| RN7SL842P  | METTL1 | 0.015913173 | 0.531345912  |
| MRPL33     | METTL1 | 0.003595886 | 0.619260707  |
| IGKV2D-29  | METTL1 | 3.33E-04    | 0.721135036  |
| PRAF2      | METTL1 | 0.008937803 | 0.56831889   |
| MCCC1-AS1  | METTL1 | 0.002261429 | 0.642283409  |
| LARP1BP2   | METTL1 | 0.04050278  | 0.461562168  |
| C4orf48    | METTL1 | 0.004231477 | -0.610742993 |
| ZNF487     | METTL1 | 0.017087638 | -0.526488547 |
| TTC4       | METTL1 | 0.006185977 | 0.589906958  |
| RPLP0P2    | METTL1 | 0.010180085 | 0.560327978  |
| EEF1A1P10  | METTL1 | 0.009401238 | 0.565237994  |
| JMJD7      | METTL1 | 0.048134665 | -0.447040302 |
| OR2A7      | METTL1 | 0.024805002 | 0.499894014  |
| TIPARP-AS1 | METTL1 | 0.002189173 | 0.64382973   |
| ZNF512     | METTL1 | 0.045052603 | 0.45267487   |
| TMEM199    | METTL1 | 0.01275076  | 0.546031708  |
| IGKV2-28   | METTL1 | 0.006583638 | 0.586352626  |
| RN7SL59P   | METTL1 | 0.004779488 | 0.60421134   |
| P2RY11     | METTL1 | 0.007623079 | 0.577830383  |
| PBX2P1     | METTL1 | 0.035403703 | 0.472493484  |
| CFHR1      | METTL1 | 0.025723948 | 0.497186957  |
| RBM12      | METTL1 | 3.01E-05    | 0.79327852   |
| OR2A1-AS1  | METTL1 | 0.011475333 | 0.552799704  |
| LILRA6     | METTL1 | 0.006087098 | -0.590819792 |
| IGKV1-27   | METTL1 | 0.018895409 | 0.519510028  |
| RPL12P33   | METTL1 | 7.37E-04    | 0.691261483  |
| FCGR2C     | METTL1 | 0.046972881 | -0.449130783 |
| ARAP1-AS2  | METTL1 | 0.045225628 | -0.452350822 |
| EEF1A1P4   | METTL1 | 2.75E-06    | 0.845032784  |
| BDNF-AS    | METTL1 | 0.011744893 | 0.551320332  |
| DDX11-AS1  | METTL1 | 0.043946646 | 0.454769108  |
| CEBPA      | METTL1 | 0.00414256  | -0.61186796  |
| SNHG6      | METTL1 | 7.44E-05    | 0.768912059  |
| RAB30-AS1  | METTL1 | 0.012337328 | 0.548163118  |
| NUDT16P1   | METTL1 | 0.008740006 | -0.569673589 |
| KCTD21-AS1 | METTL1 | 8.26E-04    | 0.686662297  |
| SBF2-AS1   | METTL1 | 0.002258954 | 0.642335685  |
| H2AFJ      | METTL1 | 0.019320083 | -0.517948514 |
| LINC00920  | METTL1 | 0.012057834 | 0.549636963  |
| SOCS2-AS1  | METTL1 | 0.045869638 | 0.451153014  |
| CSTF3-AS1  | METTL1 | 0.003663498 | 0.618297856  |
| ZBED5-AS1  | METTL1 | 0.004320148 | 0.609640438  |
| MIR4458HG  | METTL1 | 0.006921646 | 0.583467383  |
| OIP5-AS1   | METTL1 | 0.023956954 | 0.50246349   |
| CKMT2-AS1  | METTL1 | 0.005895483 | 0.592624002  |
| MTND4P12   | METTL1 | 0.007481341 | 0.578934181  |
| USP51      | METTL1 | 0.027183506 | 0.493040213  |

|              |        |             |              |
|--------------|--------|-------------|--------------|
| LINC00926    | METTL1 | 0.0186337   | 0.520486326  |
| UBA6-AS1     | METTL1 | 0.006957168 | 0.583170923  |
| SMURF2P1     | METTL1 | 0.046173822 | -0.450591748 |
| ADH1C        | METTL1 | 1.97E-04    | 0.739023868  |
| TRIM52-AS1   | METTL1 | 0.028579031 | 0.489236308  |
| SUMO2P17     | METTL1 | 0.008005719 | 0.574932179  |
| BACH1-IT1    | METTL1 | 0.048647988 | -0.44612896  |
| OTX2-AS1     | METTL1 | 0.006910649 | 0.583559416  |
| HSPA8P4      | METTL1 | 0.028139399 | -0.490418577 |
| CCDC153      | METTL1 | 0.013298087 | -0.543294232 |
| EGFLAM-AS4   | METTL1 | 0.004779488 | 0.604211341  |
| SERBP1P6     | METTL1 | 0.009727703 | 0.563141072  |
| LAMTOR3P2    | METTL1 | 0.007365869 | 0.579846135  |
| TBCAP3       | METTL1 | 5.13E-04    | 0.705363233  |
| EEF1A1P9     | METTL1 | 0.001867256 | 0.651285901  |
| LINC00939    | METTL1 | 0.00569913  | 0.594523538  |
| PDLIM1P4     | METTL1 | 0.046980883 | -0.449116249 |
| NPM1P27      | METTL1 | 6.64E-04    | 0.695410635  |
| NAIP         | METTL1 | 0.013129354 | -0.544128303 |
| GZMAP1       | METTL1 | 0.001362117 | 0.665516046  |
| EEF1A1P19    | METTL1 | 0.004577517 | 0.606542915  |
| PVT1         | METTL1 | 6.03E-04    | 0.699168396  |
| MTRNR2L5     | METTL1 | 0.005729407 | 0.594227164  |
| LINC00536    | METTL1 | 0.026890799 | 0.4938575    |
| RAC1P2       | METTL1 | 0.042071569 | 0.458414515  |
| CDC42P4      | METTL1 | 0.029374727 | -0.487132377 |
| ANKRD33B-AS1 | METTL1 | 0.012233003 | -0.548710062 |
| CIR1P2       | METTL1 | 0.016399542 | 0.529300631  |
| SMIM20       | METTL1 | 5.75E-06    | 0.830745518  |
| LINC01021    | METTL1 | 0.020612951 | 0.513357368  |
| KIAA1210     | METTL1 | 1.03E-04    | 0.759473318  |
| FGD5P1       | METTL1 | 0.008818713 | 0.56913157   |
| CHCHD10      | METTL1 | 0.021066826 | -0.511799948 |
| GPR162       | METTL1 | 0.029413693 | -0.487030502 |
| ATP6V1E2     | METTL1 | 0.013466728 | 0.542469097  |
| GAPDHP62     | METTL1 | 0.008933438 | 0.568348518  |
| ZNF969P      | METTL1 | 7.75E-04    | 0.689232218  |
| LINC00923    | METTL1 | 8.85E-04    | 0.683864968  |
| ZNF550       | METTL1 | 0.029711963 | 0.486254166  |
| PPIAP11      | METTL1 | 0.001552982 | 0.659687557  |
| LINC00605    | METTL1 | 0.045307693 | 0.452197461  |
| TRBV21-1     | METTL1 | 0.003461603 | 0.62121841   |
| MSNP1        | METTL1 | 0.03591314  | 0.471348303  |
| FAM86EP      | METTL1 | 0.020652477 | 0.51322066   |
| RNA5-8SP6    | METTL1 | 0.00735446  | 0.579936874  |
| SCARNA11     | METTL1 | 0.003465859 | 0.621155398  |
| RNU6-917P    | METTL1 | 0.005062296 | -0.601079582 |
| RNY5         | METTL1 | 1.48E-04    | 0.74828967   |
| RNU1-103P    | METTL1 | 0.040834616 | 0.460888601  |
| RNU6-320P    | METTL1 | 0.036639813 | 0.469736476  |
| SNORD116-25  | METTL1 | 0.001373709 | 0.665143094  |
| RNA5SP395    | METTL1 | 0.033921831 | -0.475899279 |
| RNU2-24P     | METTL1 | 0.005435357 | 0.597161921  |
| RNU6-1238P   | METTL1 | 0.014230182 | -0.538834653 |



|              |        |             |              |
|--------------|--------|-------------|--------------|
| RNU6-709P    | METTL1 | 1.97E-04    | 0.739023868  |
| HNRNPA3P7    | METTL1 | 0.035712972 | 0.471796749  |
| IGLV2-34     | METTL1 | 0.025927607 | 0.496597377  |
| IGHV7-56     | METTL1 | 1.97E-04    | 0.739023868  |
| IGHV3-65     | METTL1 | 0.00905109  | 0.56755396   |
| IGLV2-5      | METTL1 | 0.021599435 | 0.510006029  |
| IGLVI-70     | METTL1 | 0.048443097 | 0.44649183   |
| CCDC71L      | METTL1 | 0.006955596 | 0.583184011  |
| IGHVIII-76-1 | METTL1 | 0.048558509 | 0.446287287  |
| TUG1         | METTL1 | 0.049970257 | 0.44381491   |
| IGHVII-26-2  | METTL1 | 0.042659537 | 0.45725816   |
| HMGB1P41     | METTL1 | 1.97E-04    | 0.739023868  |
| PCDHGA7      | METTL1 | 0.03244805  | 0.479403664  |
| ALG11        | METTL1 | 0.008658247 | 0.570240861  |
| ATXN7L3B     | METTL1 | 5.13E-05    | 0.779270565  |
| PCDHGA8      | METTL1 | 0.018053111 | 0.52269192   |
| IGLV1-41     | METTL1 | 8.41E-04    | 0.685946176  |
| ETV3L        | METTL1 | 0.016156329 | -0.530317218 |
| IGKV2D-10    | METTL1 | 1.97E-04    | 0.739023868  |
| IGHV3-22     | METTL1 | 0.019963302 | 0.515634749  |
| CDC42P3      | METTL1 | 0.022701655 | 0.50640239   |
| IGHVII-20-1  | METTL1 | 4.80E-05    | 0.781099376  |
| IGLC5        | METTL1 | 0.049888238 | 0.443957075  |
| LYN          | METTL1 | 0.040920525 | -0.460714912 |
| MTND2P32     | METTL1 | 2.40E-04    | 0.732461153  |
| PINX1        | METTL1 | 2.75E-04    | 0.727842412  |
| IGKV2-26     | METTL1 | 0.013532615 | 0.542148982  |
| MTND6P3      | METTL1 | 1.97E-04    | 0.739023868  |
| CASC19       | METTL1 | 0.049759588 | 0.444180427  |
| TYW1B        | METTL1 | 0.008672587 | 0.570141054  |
| FAM90A12P    | METTL1 | 0.020182633 | 0.514859357  |
| IGHVII-1-1   | METTL1 | 1.97E-04    | 0.739023868  |
| IGHV3-79     | METTL1 | 1.32E-04    | 0.751920049  |
| IGHV7-27     | METTL1 | 5.48E-04    | 0.702870215  |
| IGHV4-55     | METTL1 | 6.76E-06    | 0.827448699  |
| SIGLEC14     | METTL1 | 0.034907634 | -0.473621016 |
| AP5B1        | METTL1 | 2.25E-04    | -0.734734792 |
| CHMP4A       | METTL1 | 0.003021207 | 0.628115519  |
| CSNK2A3      | METTL1 | 1.97E-04    | 0.739023868  |
| STT3A-AS1    | METTL1 | 0.046942811 | 0.449185414  |
| SENCR        | METTL1 | 0.004709731 | -0.605007262 |
| IGLL5        | METTL1 | 0.008865592 | 0.568810603  |
| NAP1L1P1     | METTL1 | 2.48E-04    | 0.73138154   |
| KRT18P58     | METTL1 | 1.97E-04    | 0.739023868  |
| SCARNA9      | METTL1 | 0.03729918  | 0.468295312  |
| FAM66D       | METTL1 | 0.044173362 | 0.454336517  |
| CHMP1B       | METTL1 | 1.93E-04    | 0.739731146  |
| EID3         | METTL1 | 1.10E-04    | 0.757538596  |
| SNHG9        | METTL1 | 0.001207323 | 0.670771249  |
| EID1         | METTL1 | 6.66E-04    | 0.695266731  |
| NOX5         | METTL1 | 0.045661994 | 0.451537794  |
| POLR2M       | METTL1 | 8.14E-05    | 0.766322616  |
| FDXACB1      | METTL1 | 1.08E-07    | 0.894042391  |
| OR10G2       | METTL1 | 0.014448305 | 0.537825164  |

|              |        |             |              |
|--------------|--------|-------------|--------------|
| RAB44        | METTL1 | 0.045978815 | -0.450951237 |
| PABPC1P4     | METTL1 | 0.005522454 | 0.596279305  |
| SNHG1        | METTL1 | 7.15E-07    | 0.867865241  |
| TIFAB        | METTL1 | 0.021403232 | -0.510662743 |
| ZNF432       | METTL1 | 1.04E-05    | 0.81820972   |
| LINC00507    | METTL1 | 0.035074839 | 0.473239583  |
| MTRNR2L3     | METTL1 | 7.79E-04    | 0.689029928  |
| ZNF10        | METTL1 | 1.84E-06    | 0.852228396  |
| ZNF486       | METTL1 | 0.044964267 | 0.45284068   |
| USP30-AS1    | METTL1 | 2.65E-04    | 0.72919084   |
| HMBS         | METTL1 | 0.014590759 | 0.537172475  |
| CACNA1C-AS2  | METTL1 | 0.008488299 | 0.571434143  |
| HIST1H3F     | METTL1 | 0.001333708 | 0.666441512  |
| RPL41P2      | METTL1 | 0.029515767 | 0.486764132  |
| ABCC6P1      | METTL1 | 0.020614482 | -0.513352069 |
| TRDV3        | METTL1 | 8.41E-04    | 0.685927417  |
| ZBTB11-AS1   | METTL1 | 0.003754031 | -0.617031391 |
| CLEC12B      | METTL1 | 0.04567541  | -0.451512892 |
| ZNF350       | METTL1 | 7.65E-05    | 0.768121567  |
| ZNF253       | METTL1 | 0.03919685  | 0.464255203  |
| A2ML1-AS2    | METTL1 | 9.73E-04    | 0.679912699  |
| KIAA1147     | METTL1 | 0.010931232 | 0.555873645  |
| LSM14A       | METTL1 | 9.53E-06    | 0.820176647  |
| CLLU1        | METTL1 | 0.033188264 | 0.477628373  |
| TAS2R38      | METTL1 | 0.03837946  | 0.465976379  |
| PWAR6        | METTL1 | 0.028891973 | 0.488403421  |
| GRAMD4P3     | METTL1 | 0.034768887 | 0.47393861   |
| EEF1A1P17    | METTL1 | 0.046853568 | 0.44934771   |
| CUX1         | METTL1 | 0.002306829 | -0.64133281  |
| OLA1P3       | METTL1 | 0.043861385 | 0.454932237  |
| CHURC1       | METTL1 | 0.009074906 | 0.56739414   |
| C17orf49     | METTL1 | 0.005953101 | 0.592076475  |
| PDF          | METTL1 | 0.02259903  | -0.506731979 |
| PPIAP6       | METTL1 | 0.0074639   | 0.579071177  |
| ASB9P1       | METTL1 | 0.020012482 | -0.515460298 |
| FAM181A-AS1  | METTL1 | 0.019213725 | 0.518336999  |
| NBEAP1       | METTL1 | 0.026240748 | 0.495697943  |
| BMS1P15      | METTL1 | 0.00136899  | 0.665294607  |
| DNAJC8P1     | METTL1 | 0.031502818 | 0.481717301  |
| PTCSC3       | METTL1 | 3.95E-04    | 0.715055489  |
| LINC00924    | METTL1 | 0.015934764 | 0.531254062  |
| ITGB3        | METTL1 | 0.017753333 | -0.523853015 |
| IGHV4OR15-8  | METTL1 | 0.021260157 | 0.511144652  |
| LINC00596    | METTL1 | 0.007117936 | 0.581844463  |
| HNRNPA1P45   | METTL1 | 0.041467012 | 0.459616589  |
| MRPL46       | METTL1 | 1.95E-04    | 0.739418335  |
| UBE2Q2L      | METTL1 | 0.002212959 | 0.643316056  |
| EEF1A1P22    | METTL1 | 2.94E-05    | 0.79381277   |
| PIGHP1       | METTL1 | 0.007987372 | -0.57506853  |
| LINC00677    | METTL1 | 0.001453706 | -0.66263897  |
| ANP32BP1     | METTL1 | 0.015164741 | 0.534593465  |
| IGHV3OR16-16 | METTL1 | 0.006379384 | 0.588155559  |
| IL21R-AS1    | METTL1 | 3.82E-04    | 0.71621693   |
| TGFB3L       | METTL1 | 0.018028172 | -0.522787924 |

|            |        |             |              |
|------------|--------|-------------|--------------|
| CSPG4P13   | METTL1 | 0.037141659 | -0.468637791 |
| MOCS1P1    | METTL1 | 1.97E-04    | 0.739023868  |
| AQP4-AS1   | METTL1 | 0.017469436 | 0.52496714   |
| MT1L       | METTL1 | 0.002751373 | 0.632766591  |
| LINC00565  | METTL1 | 6.23E-04    | 0.697880238  |
| CCPG1      | METTL1 | 0.00479027  | -0.604089165 |
| DOCK9-AS2  | METTL1 | 0.025823853 | 0.496897279  |
| TMEM178B   | METTL1 | 0.02336872  | 0.504288374  |
| RBFADN     | METTL1 | 1.21E-04    | 0.754549532  |
| ZNF865     | METTL1 | 0.01124467  | -0.554088115 |
| LINC01003  | METTL1 | 0.017761698 | -0.523820402 |
| GOLGA6L7P  | METTL1 | 0.023333473 | 0.504398869  |
| C15orf65   | METTL1 | 0.012381978 | 0.547930175  |
| GOLGA8H    | METTL1 | 0.022562343 | -0.506850091 |
| HNRNPA1P16 | METTL1 | 0.002149031 | 0.644707313  |
| CYCSP40    | METTL1 | 0.023879868 | -0.502700602 |
| RN7SL134P  | METTL1 | 5.07E-04    | 0.705773633  |
| RN7SL460P  | METTL1 | 0.047690842 | 0.447834286  |
| GTSCR1     | METTL1 | 0.013769952 | 0.541006199  |
| LINC00675  | METTL1 | 0.007722539 | 0.577065815  |
| MIR3781    | METTL1 | 0.017049851 | 0.526640594  |
| MIR5582    | METTL1 | 0.016123635 | 0.530454808  |
| RN7SL533P  | METTL1 | 6.00E-04    | 0.699330104  |
| UBBP4      | METTL1 | 7.37E-04    | 0.691238445  |
| RN7SL650P  | METTL1 | 0.013636782 | 0.541645445  |
| RN7SL374P  | METTL1 | 5.09E-04    | 0.705621169  |
| MIR4802    | METTL1 | 0.016658861 | 0.52822995   |
| RN7SL470P  | METTL1 | 1.28E-04    | 0.752693573  |
| RN7SL750P  | METTL1 | 5.50E-06    | 0.8316513    |
| MIR4632    | METTL1 | 0.01682556  | 0.527548713  |
| MIR4523    | METTL1 | 9.35E-04    | 0.681576759  |
| LINC00667  | METTL1 | 9.14E-04    | 0.68250291   |
| MIR4473    | METTL1 | 0.02335065  | 0.504345006  |
| RN7SL686P  | METTL1 | 0.010419875 | 0.558877836  |
| RN7SL275P  | METTL1 | 0.001440621 | 0.663040521  |
| RN7SL32P   | METTL1 | 0.036849736 | 0.469275478  |
| RN7SL336P  | METTL1 | 0.014369012 | 0.53819071   |
| RN7SL670P  | METTL1 | 0.002275437 | 0.641988413  |
| MIR4737    | METTL1 | 0.020807938 | 0.512684985  |
| RN7SL474P  | METTL1 | 5.50E-06    | 0.8316513    |
| RN7SL572P  | METTL1 | 5.50E-04    | 0.7026734    |
| RN7SL158P  | METTL1 | 1.97E-04    | 0.739023868  |
| MIR3667    | METTL1 | 0.001362922 | 0.665490085  |
| RN7SL866P  | METTL1 | 0.033188041 | 0.477628903  |
| MIR5006    | METTL1 | 1.01E-05    | 0.818832836  |
| MIR4442    | METTL1 | 5.28E-04    | 0.704233061  |
| MIR3168    | METTL1 | 0.001149843 | 0.67286793   |
| LINC00909  | METTL1 | 7.35E-04    | 0.691396663  |
| RN7SL835P  | METTL1 | 0.00550171  | 0.59648847   |
| MIR4767    | METTL1 | 0.02564113  | -0.497427765 |
| RN7SL613P  | METTL1 | 1.97E-04    | 0.739023868  |
| RN7SL431P  | METTL1 | 0.020518988 | -0.513683192 |
| RN7SL421P  | METTL1 | 2.28E-05    | 0.800178219  |
| MIR4736    | METTL1 | 0.028610478 | -0.489152291 |

|            |        |             |              |
|------------|--------|-------------|--------------|
| RN7SL528P  | METTL1 | 8.16E-04    | 0.687141667  |
| MIR5706    | METTL1 | 1.97E-04    | 0.739023868  |
| LINC00526  | METTL1 | 7.42E-06    | 0.825489892  |
| DPRXP4     | METTL1 | 0.036286343 | -0.470517368 |
| MIR1273C   | METTL1 | 0.008654648 | 0.570265939  |
| RN7SL345P  | METTL1 | 1.22E-04    | 0.754263922  |
| RN7SL206P  | METTL1 | 0.00260079  | 0.635529862  |
| RN7SL540P  | METTL1 | 0.004779488 | 0.604211341  |
| RN7SL245P  | METTL1 | 8.07E-04    | 0.687634664  |
| RN7SL102P  | METTL1 | 1.89E-04    | 0.740396742  |
| LRRRC37A7P | METTL1 | 5.99E-05    | 0.775037016  |
| RN7SL667P  | METTL1 | 2.41E-04    | 0.732350676  |
| RN7SL407P  | METTL1 | 0.00249513  | 0.637549528  |
| ARGFXP2    | METTL1 | 0.024936016 | -0.499503277 |
| RN7SL365P  | METTL1 | 0.020956306 | 0.512176708  |
| RN7SL391P  | METTL1 | 0.002147213 | 0.644747387  |
| MIR4740    | METTL1 | 0.013753682 | -0.54108403  |
| RN7SL811P  | METTL1 | 0.002975824 | 0.628872919  |
| MIR3941    | METTL1 | 2.82E-04    | 0.726987465  |
| RN7SL243P  | METTL1 | 8.04E-04    | 0.687758873  |
| MIR4421    | METTL1 | 1.97E-04    | 0.739023868  |
| RN7SL605P  | METTL1 | 0.002112869 | 0.645509697  |
| RN7SL92P   | METTL1 | 0.030179088 | 0.485050539  |
| RN7SL133P  | METTL1 | 0.04301278  | 0.456569343  |
| RN7SL723P  | METTL1 | 2.41E-04    | 0.732350676  |
| RN7SL64P   | METTL1 | 0.023214331 | 0.504773356  |
| RPL17      | METTL1 | 7.75E-04    | 0.689234846  |
| RN7SL49P   | METTL1 | 0.032800852 | 0.478553616  |
| RN7SL376P  | METTL1 | 0.004779488 | 0.604211341  |
| RN7SL360P  | METTL1 | 2.41E-04    | 0.732350676  |
| RN7SL548P  | METTL1 | 5.50E-06    | 0.8316513    |
| MIR4489    | METTL1 | 2.85E-04    | 0.726603899  |
| MIR544B    | METTL1 | 0.016074216 | -0.53066321  |
| ESRG       | METTL1 | 0.002295693 | 0.641564522  |
| MIR3609    | METTL1 | 1.18E-06    | 0.859783808  |
| RN7SL3     | METTL1 | 1.03E-04    | 0.75944348   |
| RN7SL562P  | METTL1 | 0.001234368 | 0.669813705  |
| RN7SL114P  | METTL1 | 1.97E-04    | 0.739023868  |
| RN7SL550P  | METTL1 | 0.007302258 | 0.580353528  |
| RN7SL758P  | METTL1 | 1.97E-04    | 0.739023868  |
| MIR3176    | METTL1 | 0.015751115 | -0.53203854  |
| RN7SL138P  | METTL1 | 0.00984306  | -0.562413793 |
| RN7SL510P  | METTL1 | 3.73E-04    | 0.717126285  |
| SNORA76    | METTL1 | 0.003808001 | 0.616288404  |
| CBX3P2     | METTL1 | 5.62E-04    | 0.701891905  |
| RN7SL235P  | METTL1 | 0.006379384 | 0.588155559  |
| RN7SL202P  | METTL1 | 0.010105409 | 0.560785251  |
| RN7SL137P  | METTL1 | 0.002606091 | 0.635430357  |
| AARSD1     | METTL1 | 0.005179872 | 0.5998199    |
| OR1AB1P    | METTL1 | 1.97E-04    | 0.739023868  |
| ZNF582-AS1 | METTL1 | 1.24E-05    | 0.814456891  |
| NFE2L3P1   | METTL1 | 0.049551867 | -0.444541992 |
| S1PR2      | METTL1 | 0.028590907 | -0.489204572 |
| LIN37      | METTL1 | 7.73E-05    | 0.767846128  |

|             |        |             |              |
|-------------|--------|-------------|--------------|
| NDUFA7      | METTL1 | 0.002217599 | 0.643216384  |
| PTOV1-AS1   | METTL1 | 1.47E-04    | 0.748549556  |
| EEF1A1P7    | METTL1 | 0.015998545 | 0.530983313  |
| SIGLEC20P   | METTL1 | 0.04987117  | -0.443986682 |
| DNAH17-AS1  | METTL1 | 1.97E-04    | 0.739023868  |
| CYP2T3P     | METTL1 | 0.047681735 | -0.447850638 |
| VN1R80P     | METTL1 | 0.025355725 | 0.498262359  |
| ZNF723      | METTL1 | 0.003136953 | 0.626225797  |
| SIGLEC22P   | METTL1 | 0.003807566 | -0.616294363 |
| HNRNPA1P52  | METTL1 | 0.001914429 | 0.650129081  |
| ZSCAN16-AS1 | METTL1 | 0.034565613 | 0.4744057    |
| SPIB        | METTL1 | 0.028075181 | 0.490592486  |

## Additional file 2: Table S2: DEGs

| name           | baseMean    | log2FoldChange | lfcSE       | stat        | pvalue      | padj        |
|----------------|-------------|----------------|-------------|-------------|-------------|-------------|
| IFI44L         | 9142.45854  | 2.066960259    | 0.361934535 | 5.710867743 | 1.12402E-08 | 1.66594E-05 |
| FFAR2          | 999.009647  | 1.983431199    | 0.273191811 | 7.260214687 | 3.86476E-13 | 8.59214E-09 |
| RP11-1149M10.1 | 5.261963955 | 1.955047156    | 0.372179759 | 5.252964759 | 1.4967E-07  | 8.29743E-05 |
| NRIR           | 248.4395346 | 1.903196626    | 0.346121253 | 5.498641325 | 3.82729E-08 | 3.54534E-05 |
| RSAD2          | 2769.486518 | 1.901060592    | 0.353205989 | 5.382299996 | 7.35401E-08 | 5.06944E-05 |
| RP11-925D8.3   | 4.422883639 | 1.880630996    | 0.382648728 | 4.91477133  | 8.88861E-07 | 0.000278326 |
| ZDHHC4P1       | 12.73688959 | 1.811322076    | 0.359485442 | 5.038652094 | 4.68822E-07 | 0.00016811  |
| USP18          | 867.4885983 | 1.798614153    | 0.34266577  | 5.248887717 | 1.5302E-07  | 8.29743E-05 |
| IFIT3          | 4300.698368 | 1.790183044    | 0.350422909 | 5.108635881 | 3.24493E-07 | 0.000147227 |
| CTD-3247F14.2  | 204.9877947 | 1.789652989    | 0.331228476 | 5.403077078 | 6.55073E-08 | 5.06944E-05 |
| GBP1P1         | 71.18267883 | 1.747861849    | 0.34638453  | 5.046015903 | 4.51118E-07 | 0.000167154 |
| CTA-384D8.31   | 23.8650707  | 1.732871236    | 0.374073768 | 4.632431851 | 3.61395E-06 | 0.000763287 |
| RP11-16C1.2    | 10.52322265 | 1.723469258    | 0.372997696 | 4.620589557 | 3.82651E-06 | 0.000780468 |
| HMGB1P3        | 4.022195908 | 1.719699783    | 0.374560035 | 4.591252735 | 4.40593E-06 | 0.000867816 |
| SNORA51        | 3.141929276 | 1.709172836    | 0.38375813  | 4.453776231 | 8.4373E-06  | 0.001339844 |
| CMPK2          | 2590.343002 | 1.708976465    | 0.331042053 | 5.16241502  | 2.43784E-07 | 0.000115315 |
| ISG15          | 2796.326576 | 1.698428258    | 0.32860069  | 5.168669172 | 2.35767E-07 | 0.000113947 |
| MTOR-AS1       | 6.089452162 | 1.68636474     | 0.359585827 | 4.689741958 | 2.7355E-06  | 0.000633496 |
| IFI6           | 4350.869472 | 1.671248704    | 0.334405239 | 4.997675008 | 5.80257E-07 | 0.000195459 |
| CTD-2373N4.5   | 2.847171444 | 1.663845824    | 0.384038221 | 4.332500607 | 1.47425E-05 | 0.00188482  |
| IFIT1          | 2404.046366 | 1.657303854    | 0.365338017 | 4.5363575   | 5.72341E-06 | 0.001009864 |
| LINC00487      | 91.57891588 | 1.651603375    | 0.383377163 | 4.308037971 | 1.64709E-05 | 0.002023101 |
| GALNT14        | 16.66233573 | 1.651260924    | 0.29012613  | 5.691527765 | 1.25908E-08 | 1.74949E-05 |
| MTND4P14       | 20.81311881 | 1.641059891    | 0.355464576 | 4.61666225  | 3.89961E-06 | 0.000788147 |
| IFI44          | 5873.64464  | 1.639735111    | 0.323845189 | 5.063330158 | 4.11995E-07 | 0.000163562 |
| AC002511.3     | 8.39317586  | 1.636213399    | 0.349112687 | 4.686777253 | 2.77541E-06 | 0.000636112 |
| LAMP3          | 399.8082004 | 1.599364845    | 0.343431486 | 4.657012851 | 3.2083E-06  | 0.000692495 |
| RP11-336A10.2  | 5.452924121 | 1.598513553    | 0.36982683  | 4.322329863 | 1.5439E-05  | 0.001928315 |
| CTD-2047H16.2  | 7.263271598 | 1.594874999    | 0.348351105 | 4.57835493  | 4.68647E-06 | 0.000905997 |
| MTND1P11       | 23.20759625 | 1.592998814    | 0.348981719 | 4.564705623 | 5.00196E-06 | 0.000950457 |
| IFI27          | 1137.844374 | 1.577432928    | 0.384442724 | 4.103167596 | 4.07532E-05 | 0.003387005 |
| AC098831.4     | 10.76574143 | 1.574100318    | 0.346130038 | 4.547713709 | 5.42318E-06 | 0.000997662 |
| RP11-34P13.9   | 3.338617191 | 1.572443573    | 0.377915394 | 4.160834936 | 3.17086E-05 | 0.002889123 |
| AC009505.2     | 5.113484279 | 1.569104641    | 0.375950691 | 4.173697987 | 2.99695E-05 | 0.002776175 |
| RP11-288L9.4   | 96.17178222 | 1.560205937    | 0.307286034 | 5.07737341  | 3.82688E-07 | 0.00015469  |
| EPST11         | 4797.484857 | 1.556092438    | 0.305925263 | 5.086511728 | 3.64709E-07 | 0.000152985 |
| RP11-665C16.1  | 3.32102606  | 1.535205854    | 0.378352624 | 4.057605938 | 4.95783E-05 | 0.003827172 |
| PCCA-AS1       | 6.229457572 | 1.530163513    | 0.382209571 | 4.003467283 | 6.24208E-05 | 0.004485439 |
| IGKV3D-15      | 23.78930221 | 1.528414334    | 0.377101841 | 4.053054556 | 5.05532E-05 | 0.003853749 |
| CHRN2          | 9.779691019 | 1.527966608    | 0.303169062 | 5.039981974 | 4.65576E-07 | 0.00016811  |
| RN7SL127P      | 5.451456544 | 1.523429087    | 0.357736908 | 4.258518073 | 2.05787E-05 | 0.00224267  |
| AP001610.5     | 26.53378485 | 1.52118104     | 0.335482275 | 4.534311216 | 5.77918E-06 | 0.001011674 |
| SERPING1       | 865.6345054 | 1.519292095    | 0.358687128 | 4.235702859 | 2.27838E-05 | 0.002408046 |
| HERC5          | 2010.778974 | 1.517027704    | 0.298727227 | 5.078304111 | 3.80819E-07 | 0.00015469  |
| SPATS2L        | 727.8862218 | 1.509223684    | 0.296494574 | 5.090223628 | 3.57641E-07 | 0.000152985 |
| RP11-493P1.2   | 9.549944861 | 1.498436653    | 0.301140398 | 4.975873924 | 6.49539E-07 | 0.000212361 |
| SRGAP2-AS1     | 2.592067647 | 1.478735981    | 0.385296218 | 3.83791979  | 0.000124081 | 0.006583696 |
| RP11-421E14.2  | 3.567529412 | 1.477890489    | 0.375303993 | 3.937849093 | 8.22153E-05 | 0.005252327 |
| CTD-2047H16.4  | 127.2432835 | 1.477174399    | 0.26315017  | 5.61342749  | 1.98358E-08 | 2.44994E-05 |
| OTOF           | 1157.710194 | 1.476893652    | 0.385154364 | 3.834549961 | 0.000125794 | 0.006611492 |

|               |             |             |             |             |             |             |
|---------------|-------------|-------------|-------------|-------------|-------------|-------------|
| MIR645        | 7.016199252 | 1.474529256 | 0.33048669  | 4.46169029  | 8.13157E-06 | 0.00131957  |
| OASL          | 1247.780452 | 1.471362308 | 0.324890308 | 4.528797176 | 5.93204E-06 | 0.001022334 |
| PROK2         | 557.8323723 | 1.465863674 | 0.245330216 | 5.975063724 | 2.3E-09     | 5.09569E-06 |
| AP001626.1    | 7.906994769 | 1.46207884  | 0.367839677 | 3.974771981 | 7.04467E-05 | 0.004867074 |
| RP11-925D8.6  | 3.561815661 | 1.455471191 | 0.384992249 | 3.780520767 | 0.000156501 | 0.007613398 |
| MUC5B         | 12.41379936 | 1.452956049 | 0.342363164 | 4.243902968 | 2.19665E-05 | 0.002347885 |
| RP11-280G9.1  | 5.482714383 | 1.452593054 | 0.376759855 | 3.855487874 | 0.000115499 | 0.006324569 |
| RNU4ATAC12P   | 5.486042332 | 1.449543535 | 0.381463231 | 3.799956109 | 0.000144722 | 0.007197882 |
| CCL2          | 269.8878533 | 1.440239481 | 0.383937028 | 3.751238813 | 0.000175963 | 0.008049402 |
| RPL7P49       | 3.801055824 | 1.436292601 | 0.371190371 | 3.869423115 | 0.000109093 | 0.006048278 |
| IFIT2         | 3310.625211 | 1.436003871 | 0.33541553  | 4.281268288 | 1.85831E-05 | 0.002194994 |
| DLGAP1        | 27.47616423 | 1.435820481 | 0.369645768 | 3.884314676 | 0.000102619 | 0.005880325 |
| AC093627.12   | 12.81945022 | 1.431797631 | 0.341781157 | 4.189223432 | 2.79911E-05 | 0.002659391 |
| RP11-925D8.5  | 5.796348007 | 1.429712681 | 0.380450115 | 3.757950449 | 0.000171311 | 0.007901622 |
| IGFL2         | 6.851111043 | 1.428365071 | 0.384700945 | 3.712923216 | 0.000204879 | 0.00893112  |
| EGR3          | 2910.464034 | 1.424135079 | 0.314398302 | 4.529716187 | 5.9063E-06  | 0.001022334 |
| DNM1P34       | 4.316083486 | 1.415061205 | 0.358872583 | 3.943074146 | 8.04438E-05 | 0.005229316 |
| LGALS3BP      | 2795.481399 | 1.413461171 | 0.281040142 | 5.029392451 | 4.92036E-07 | 0.000170921 |
| RP11-477G18.2 | 2.884704582 | 1.412398602 | 0.381244327 | 3.704707199 | 0.000211635 | 0.009085228 |
| RP11-69H7.2   | 9.922538362 | 1.409119491 | 0.335915659 | 4.194860983 | 2.73039E-05 | 0.002639219 |
| FCF1P1        | 3.761307356 | 1.408310169 | 0.373485758 | 3.77071987  | 0.000162777 | 0.007765805 |
| TMEM178B      | 34.12476945 | 1.406246821 | 0.332286056 | 4.232036814 | 2.31584E-05 | 0.002428578 |
| AC002543.2    | 14.26562784 | 1.404694841 | 0.333667305 | 4.20986659  | 2.55522E-05 | 0.002536051 |
| RN7SL798P     | 10.57324102 | 1.396731162 | 0.359031614 | 3.890273467 | 0.000100131 | 0.005812478 |
| OR52P1P       | 4.65954404  | 1.395465415 | 0.355505472 | 3.925299395 | 8.66219E-05 | 0.005458842 |
| ADORA2A-AS1   | 78.83393878 | 1.391255298 | 0.281426587 | 4.943581602 | 7.67002E-07 | 0.0002436   |
| RP11-405F3.4  | 15.25376571 | 1.38488598  | 0.355802167 | 3.892292148 | 9.93016E-05 | 0.005794416 |
| FAM225A       | 26.36856938 | 1.382892324 | 0.357198662 | 3.871493575 | 0.000108171 | 0.006040142 |
| IGLV3-19      | 506.7029094 | 1.381763557 | 0.351006272 | 3.93657797  | 8.26518E-05 | 0.005265084 |
| TNFAIP6       | 92.12969026 | 1.377294355 | 0.360252339 | 3.823137853 | 0.000131764 | 0.006844343 |
| RN7SL558P     | 2.577899941 | 1.3718103   | 0.384748233 | 3.565475248 | 0.000363197 | 0.012499389 |
| RP11-616K22.2 | 3.248776847 | 1.370819615 | 0.377979378 | 3.626704771 | 0.000287061 | 0.01083522  |
| RP11-96C23.9  | 3.220824958 | 1.370648509 | 0.378180916 | 3.624319611 | 0.000289723 | 0.010898689 |
| RP11-52J3.2   | 2.608448746 | 1.365043119 | 0.385134288 | 3.54433028  | 0.000393612 | 0.01298335  |
| MAP6          | 7.947911867 | 1.3647882   | 0.376008961 | 3.629669343 | 0.000283785 | 0.010729757 |
| OR56B2P       | 2.765542108 | 1.364219793 | 0.384969236 | 3.543711196 | 0.000394537 | 0.012994593 |
| CAV1          | 83.13752084 | 1.357932558 | 0.375346847 | 3.617807292 | 0.000297109 | 0.011025816 |
| RP11-561O23.8 | 8.305352033 | 1.356937689 | 0.317488681 | 4.273971858 | 1.92021E-05 | 0.002211926 |
| C17orf77      | 5.518383767 | 1.353606926 | 0.354983797 | 3.813151292 | 0.000137206 | 0.006964304 |
| Z85986.1      | 14.04729319 | 1.350894265 | 0.339983298 | 3.97341361  | 7.08499E-05 | 0.004867074 |
| RP11-324E6.6  | 5.721123848 | 1.350764408 | 0.373532686 | 3.616187981 | 0.000298973 | 0.011025816 |
| SIGLEC1       | 6252.579929 | 1.348292161 | 0.38372905  | 3.513656738 | 0.000441984 | 0.013685486 |
| RP11-196G18.3 | 10.04720691 | 1.347891328 | 0.358505066 | 3.759755321 | 0.00017008  | 0.007867518 |
| RN7SKP243     | 2.640134174 | 1.346990791 | 0.384865373 | 3.499901226 | 0.000465431 | 0.014059039 |
| CHGA          | 3.710251458 | 1.346867962 | 0.36693349  | 3.67060516  | 0.000241977 | 0.009798962 |
| RP11-16E23.3  | 3.713176116 | 1.344070395 | 0.376403327 | 3.570824959 | 0.000355859 | 0.012324439 |
| IFITM3        | 8133.90683  | 1.343813749 | 0.328035302 | 4.096552236 | 4.19349E-05 | 0.003402542 |
| RP1-228H13.2  | 8.127613611 | 1.339386663 | 0.34443291  | 3.888672146 | 0.000100794 | 0.005820405 |
| OAS3          | 12079.28644 | 1.337768725 | 0.316548553 | 4.226109113 | 2.37767E-05 | 0.002447236 |
| MARK2P8       | 14.30141345 | 1.337348875 | 0.353869371 | 3.779216239 | 0.000157323 | 0.00763668  |
| RP11-91P24.1  | 4.58943613  | 1.33653929  | 0.346810181 | 3.853806387 | 0.000116296 | 0.006336969 |
| ALAS2         | 571.8098519 | 1.33408195  | 0.385171886 | 3.463601575 | 0.000532995 | 0.015571028 |
| CSRP2         | 12.37002096 | 1.329562141 | 0.315627165 | 4.212445219 | 2.52621E-05 | 0.002525129 |
| MRPL53P1      | 4.324603108 | 1.329392856 | 0.374659516 | 3.548269297 | 0.000387772 | 0.012837612 |

|                |             |             |             |             |             |             |
|----------------|-------------|-------------|-------------|-------------|-------------|-------------|
| SNORA31        | 4.911387519 | 1.32615088  | 0.368107481 | 3.602618656 | 0.000315028 | 0.011406664 |
| MX1            | 7889.909242 | 1.325465522 | 0.320540629 | 4.135093662 | 3.5481E-05  | 0.003093386 |
| RP11-670E13.3  | 7.821536986 | 1.32331674  | 0.36210747  | 3.654486169 | 0.000257698 | 0.010176078 |
| CNN2P1         | 13.55258491 | 1.322749249 | 0.310297544 | 4.262841503 | 2.01844E-05 | 0.002241387 |
| RP11-737O24.3  | 6.731954376 | 1.312900038 | 0.335491703 | 3.913360672 | 9.10204E-05 | 0.005567492 |
| AC009542.2     | 17.15397266 | 1.311124626 | 0.306505569 | 4.277653522 | 1.88874E-05 | 0.002194994 |
| CSNK1G2P1      | 4.91246416  | 1.309458892 | 0.362501325 | 3.612287184 | 0.000303508 | 0.011144608 |
| ALG1L          | 3.57919376  | 1.307882933 | 0.377432771 | 3.465207672 | 0.000529822 | 0.015539587 |
| RP11-39K24.4   | 37.33455773 | 1.305870376 | 0.347263536 | 3.760459254 | 0.000169602 | 0.007867518 |
| RP11-627K11.3  | 5.030942602 | 1.304329326 | 0.362186738 | 3.601261977 | 0.000316676 | 0.011435202 |
| ANXA3          | 143.456875  | 1.300092856 | 0.349798397 | 3.716691863 | 0.000201848 | 0.008833648 |
| AP001469.5     | 3.60337919  | 1.300030634 | 0.370094575 | 3.512698434 | 0.000443581 | 0.013696784 |
| AMZ2P2         | 2.786513468 | 1.299800855 | 0.3831723   | 3.392209868 | 0.000693313 | 0.017881366 |
| CXCL13         | 5.290656944 | 1.299273872 | 0.382936875 | 3.39291919  | 0.00069152  | 0.017855843 |
| CACNA1E        | 20.65366898 | 1.297476974 | 0.305005206 | 4.253950257 | 2.10032E-05 | 0.002277771 |
| CTD-2313J17.1  | 6.290493245 | 1.297468675 | 0.325116099 | 3.990785691 | 6.58548E-05 | 0.004647883 |
| AGRN           | 880.7885591 | 1.296311478 | 0.241206168 | 5.374288266 | 7.68858E-08 | 5.06944E-05 |
| IGKV2D-30      | 13.39294199 | 1.296171494 | 0.37517756  | 3.454821482 | 0.000550657 | 0.015827968 |
| KREMEN1        | 126.3445953 | 1.286677753 | 0.219354142 | 5.865755442 | 4.47092E-09 | 7.64597E-06 |
| IGLVI-70       | 9.881963896 | 1.286002116 | 0.381159767 | 3.373918835 | 0.000741062 | 0.018574175 |
| TET2-AS1       | 7.329306093 | 1.285955671 | 0.355132268 | 3.621061189 | 0.000293397 | 0.010981492 |
| LPAR3          | 28.73177519 | 1.28566926  | 0.335730109 | 3.829472615 | 0.000128418 | 0.00671763  |
| ANKRD44-IT1    | 53.7262975  | 1.285474707 | 0.300942479 | 4.271496365 | 1.94166E-05 | 0.002221285 |
| EIF2AK2        | 5838.454698 | 1.284557257 | 0.255165274 | 5.034216595 | 4.79807E-07 | 0.000169319 |
| MGAM2          | 17.21891964 | 1.283922523 | 0.36252527  | 3.541608348 | 0.000397695 | 0.01305992  |
| RP11-701P16.2  | 29.20676614 | 1.283842763 | 0.361712495 | 3.549345908 | 0.000386189 | 0.012837612 |
| LRRC4B         | 16.31405089 | 1.283554347 | 0.337549293 | 3.802568616 | 0.000143204 | 0.007138346 |
| RP4-676J13.2   | 4.76049933  | 1.283063004 | 0.359986708 | 3.564195496 | 0.000364974 | 0.012514789 |
| IGKV3-15       | 557.8468213 | 1.282478396 | 0.347765369 | 3.68776914  | 0.000226229 | 0.009309895 |
| RP4-641G12.3   | 7.055111971 | 1.279057818 | 0.355543367 | 3.59747344  | 0.000321323 | 0.011549436 |
| FFAR3          | 39.10395779 | 1.278824779 | 0.334821923 | 3.819417701 | 0.000133767 | 0.006893834 |
| RP11-16C1.1    | 6.857550535 | 1.278452525 | 0.353292212 | 3.618683014 | 0.000296106 | 0.011025816 |
| CBS            | 16.55836862 | 1.278199043 | 0.31175538  | 4.100006363 | 4.13139E-05 | 0.003387005 |
| RN7SL502P      | 4.038387779 | 1.276234476 | 0.381340154 | 3.34670887  | 0.00081777  | 0.019676053 |
| RP11-557C18.3  | 7.558640026 | 1.275886923 | 0.350287452 | 3.64239974  | 0.000270108 | 0.010461751 |
| MIR3909        | 8.236593662 | 1.275044207 | 0.334819699 | 3.808151701 | 0.000140009 | 0.007074292 |
| MIR4441        | 2.711734097 | 1.272018753 | 0.376334939 | 3.380017692 | 0.000724812 | 0.018290593 |
| RP11-517O13.1  | 2.56793678  | 1.270827177 | 0.383499856 | 3.313761811 | 0.000920499 | 0.021054044 |
| SLC1A2         | 10.27845744 | 1.265992433 | 0.283987288 | 4.457919378 | 8.2759E-06  | 0.001328446 |
| CTC-505O3.3    | 2.607413279 | 1.265937999 | 0.383278967 | 3.302915394 | 0.000956853 | 0.021596696 |
| CTC-450M9.1    | 3.955873176 | 1.265445394 | 0.368812021 | 3.431139231 | 0.000601052 | 0.016703236 |
| MIR644A        | 10.52728759 | 1.265276304 | 0.369858816 | 3.420971056 | 0.00062398  | 0.016994421 |
| RNU7-40P       | 15.96236386 | 1.264096989 | 0.296401404 | 4.264814445 | 2.00068E-05 | 0.002241387 |
| IGKV1D-39      | 5.019592961 | 1.264021132 | 0.382944065 | 3.300798332 | 0.000964102 | 0.021694236 |
| RNU6-638P      | 39.89848176 | 1.259345762 | 0.307094967 | 4.100834914 | 4.11662E-05 | 0.003387005 |
| RP11-1086F11.1 | 5.950552412 | 1.259078147 | 0.336879446 | 3.737473933 | 0.000185878 | 0.008381366 |
| FCGR3B         | 3812.992398 | 1.257797578 | 0.351260307 | 3.580813297 | 0.000342526 | 0.012049123 |
| IL13           | 7.146851901 | 1.25544542  | 0.351221875 | 3.574508048 | 0.000350887 | 0.012265598 |
| RSPO4          | 8.149292688 | 1.253891377 | 0.34504344  | 3.634010189 | 0.00027905  | 0.010623007 |
| RP11-44N11.1   | 6.994308595 | 1.252647777 | 0.351718838 | 3.561503229 | 0.000368738 | 0.012592586 |
| ZNF90P1        | 4.897039612 | 1.252359491 | 0.366520508 | 3.4168879   | 0.000633414 | 0.017069152 |
| MKRN2          | 3.665387915 | 1.249243332 | 0.362513683 | 3.446058425 | 0.000568827 | 0.016109771 |
| PXT1           | 3.856519479 | 1.249160744 | 0.354743096 | 3.521310934 | 0.000429419 | 0.013465216 |
| RP3-509L4.3    | 4.340090563 | 1.24907886  | 0.381382791 | 3.275131683 | 0.001056127 | 0.023006818 |



|               |             |             |             |             |             |             |
|---------------|-------------|-------------|-------------|-------------|-------------|-------------|
| IGLV1-40      | 1136.684643 | 1.246431021 | 0.381231958 | 3.269481991 | 0.001077446 | 0.023338679 |
| SLC12A8       | 31.59727973 | 1.245653283 | 0.337812682 | 3.687408284 | 0.00022655  | 0.009309895 |
| AC008937.2    | 18.27389674 | 1.245326576 | 0.358434256 | 3.47435145  | 0.00051209  | 0.015139336 |
| CENPUP2       | 10.59894061 | 1.245067849 | 0.309582596 | 4.02176306  | 5.77641E-05 | 0.004239861 |
| HMG2P28       | 4.458788618 | 1.243037999 | 0.356471905 | 3.487057411 | 0.000488367 | 0.014612872 |
| MIR221        | 18.13583363 | 1.241712427 | 0.31326178  | 3.963817192 | 7.37607E-05 | 0.005011804 |
| SNORA70G      | 7.471239338 | 1.240341724 | 0.380919088 | 3.256181596 | 0.001129215 | 0.023909246 |
| RP11-460N11.2 | 3.637126668 | 1.23932648  | 0.37432371  | 3.310841522 | 0.000930159 | 0.021231302 |
| IGKV3D-20     | 39.10752616 | 1.234811019 | 0.383426159 | 3.220466293 | 0.001279822 | 0.025796022 |
| CSF2RBP1      | 4.916346959 | 1.234713952 | 0.383767016 | 3.217352977 | 0.001293793 | 0.025884112 |
| GMPR          | 349.7838825 | 1.234571453 | 0.281623703 | 4.383762595 | 1.16647E-05 | 0.001631002 |
| ADRB1         | 64.22775161 | 1.233277481 | 0.351345765 | 3.510153256 | 0.000447848 | 0.013753288 |
| B3GNT5        | 951.9157311 | 1.232639746 | 0.312372802 | 3.94605336  | 7.94499E-05 | 0.00519509  |
| RP3-415N12.1  | 5.78918678  | 1.232604016 | 0.345465527 | 3.567950838 | 0.000359784 | 0.012401113 |
| HNRNPA1P34    | 5.633645815 | 1.231791515 | 0.363871971 | 3.385233303 | 0.000711178 | 0.018111002 |
| E2F7          | 45.54010489 | 1.231197238 | 0.332855387 | 3.698895335 | 0.00021654  | 0.009144252 |
| RP11-90D4.3   | 3.007198034 | 1.23043888  | 0.375180215 | 3.279594264 | 0.001039565 | 0.022798712 |
| HMGB1P14      | 11.68075594 | 1.229265815 | 0.317101621 | 3.876567421 | 0.00010594  | 0.006001233 |
| IGLV2-14      | 550.6815493 | 1.228058835 | 0.354129957 | 3.46781968  | 0.000524699 | 0.015409661 |
| GAPDHP42      | 23.02698118 | 1.227814471 | 0.290859562 | 4.221330956 | 2.42864E-05 | 0.002465458 |
| KREMEN2       | 10.67374878 | 1.225481608 | 0.299842366 | 4.087086238 | 4.36825E-05 | 0.003518655 |
| RP11-326L17.1 | 2.278486695 | 1.224881181 | 0.383014444 | 3.198002586 | 0.00138383  | 0.026869273 |
| RP11-723D22.2 | 2.454376091 | 1.224610263 | 0.383612411 | 3.192311376 | 0.001411391 | 0.027197697 |
| RPS20P15      | 6.612703706 | 1.222927178 | 0.360709061 | 3.390342278 | 0.000698054 | 0.017926813 |
| MESP1         | 9.867043637 | 1.221082084 | 0.338496169 | 3.607373428 | 0.000309312 | 0.011277185 |
| APOBEC3A      | 4730.353923 | 1.217370055 | 0.292807252 | 4.157581642 | 3.21634E-05 | 0.002906738 |
| RP3-403L10.3  | 4.078813069 | 1.215915026 | 0.377877517 | 3.217749068 | 0.001292008 | 0.025884112 |
| LY6E          | 9943.332788 | 1.214338808 | 0.284339703 | 4.270732488 | 1.94832E-05 | 0.002221285 |
| IGHG3         | 2835.749859 | 1.213114451 | 0.375602946 | 3.22977885  | 0.00123886  | 0.025291402 |
| TRPC5         | 3.270130955 | 1.212936771 | 0.384334767 | 3.155938196 | 0.001599828 | 0.029197363 |
| AC019084.7    | 3.944266047 | 1.212875534 | 0.383877964 | 3.159534142 | 0.001580216 | 0.028970825 |
| SPAG6         | 8.112127595 | 1.212367313 | 0.358809958 | 3.378856376 | 0.00072788  | 0.018347203 |
| CXCL11        | 14.71503203 | 1.211738116 | 0.369486708 | 3.279517479 | 0.001039848 | 0.022798712 |
| RN7SKP292     | 3.649755582 | 1.210785293 | 0.365755545 | 3.310367561 | 0.000931735 | 0.021245477 |
| RP11-467L19.8 | 6.86245501  | 1.207282502 | 0.336009174 | 3.593004588 | 0.000326887 | 0.011721529 |
| ZNF462        | 49.56683763 | 1.206506523 | 0.333586695 | 3.616770515 | 0.000298302 | 0.011025816 |
| RP5-1099D15.1 | 13.36537655 | 1.206487431 | 0.313036585 | 3.854141946 | 0.000116136 | 0.006336969 |
| RP11-848G14.2 | 3.469793717 | 1.206057144 | 0.384688543 | 3.135152227 | 0.00171765  | 0.030261081 |
| AP001628.6    | 11.43016348 | 1.20409742  | 0.284892516 | 4.22649719  | 2.37357E-05 | 0.002447236 |
| MIR4540       | 2.652510327 | 1.204024181 | 0.384853577 | 3.128525373 | 0.001756858 | 0.030610091 |
| MIR623        | 9.229840362 | 1.203744176 | 0.310544666 | 3.876235239 | 0.000106085 | 0.006001233 |
| GDAP1L1       | 3.543473976 | 1.201879858 | 0.385041565 | 3.121428871 | 0.001799757 | 0.031089512 |
| RP1-71H24.1   | 6.372451759 | 1.201062497 | 0.363192569 | 3.306957793 | 0.000943151 | 0.021396054 |
| BCL2L14       | 27.32363336 | 1.198223071 | 0.347002528 | 3.453067269 | 0.000554251 | 0.015878999 |
| H2AFZP1       | 7.514278006 | 1.198182996 | 0.353285137 | 3.391546574 | 0.000694994 | 0.017883212 |
| ADAMTS7P3     | 20.5699132  | 1.193195619 | 0.292829886 | 4.07470574  | 4.60726E-05 | 0.003632886 |
| DDX60         | 3050.084652 | 1.192382734 | 0.271079828 | 4.398640596 | 1.08931E-05 | 0.001606832 |
| HERC6         | 1664.522245 | 1.191694375 | 0.269435784 | 4.422925402 | 9.73734E-06 | 0.001500493 |
| MIR23A        | 41.27360476 | 1.190518338 | 0.33196474  | 3.58627949  | 0.000335429 | 0.011893569 |
| RNU6-611P     | 5.239428625 | 1.190510093 | 0.343249264 | 3.468354389 | 0.000523656 | 0.015399372 |
| RP11-318K15.2 | 16.5939044  | 1.190508383 | 0.384628538 | 3.095215941 | 0.001966697 | 0.032926534 |
| CTD-3105H18.8 | 4.433175839 | 1.190489297 | 0.346220183 | 3.438532339 | 0.000584877 | 0.016439839 |
| RN7SKP16      | 8.835402819 | 1.189182079 | 0.329662312 | 3.607273366 | 0.000309432 | 0.011277185 |
| FAM155B       | 14.73154749 | 1.188524772 | 0.367399983 | 3.234961423 | 0.001216592 | 0.024951352 |

|               |             |             |             |             |             |             |
|---------------|-------------|-------------|-------------|-------------|-------------|-------------|
| ESRP2         | 54.84572135 | 1.188349129 | 0.35669911  | 3.331516939 | 0.00086374  | 0.020298813 |
| RP11-638I2.9  | 39.80717346 | 1.187238286 | 0.35675454  | 3.327885573 | 0.000875078 | 0.020414202 |
| RP11-273G15.2 | 39.23216981 | 1.185544063 | 0.282556669 | 4.195774492 | 2.71941E-05 | 0.002639219 |
| CEACAM1       | 238.3373764 | 1.185448242 | 0.282948912 | 4.189619367 | 2.79423E-05 | 0.002659391 |
| UCHL1         | 18.00019875 | 1.1845442   | 0.374599977 | 3.162157694 | 0.001566047 | 0.028941284 |
| RNU6V         | 3.698738642 | 1.184537765 | 0.367115116 | 3.226611258 | 0.001252655 | 0.025502775 |
| IFIT1B        | 21.08813059 | 1.182778978 | 0.385324453 | 3.069566359 | 0.002143698 | 0.034585406 |
| AC010149.4    | 21.843116   | 1.182011532 | 0.247877174 | 4.768537228 | 1.85568E-06 | 0.000493694 |
| HBA1          | 6087.858627 | 1.181600463 | 0.383143911 | 3.083959913 | 0.002042651 | 0.033738648 |
| RP11-409K20.6 | 6.419575927 | 1.181131478 | 0.369937851 | 3.192783531 | 0.001409085 | 0.027197697 |
| RP11-552C15.1 | 7.867333475 | 1.177995386 | 0.344483672 | 3.419597156 | 0.000627139 | 0.017023885 |
| AL109761.5    | 8.483778171 | 1.176389593 | 0.31250427  | 3.764395254 | 0.000166953 | 0.007822964 |
| IGLV6-57      | 290.1125747 | 1.174853066 | 0.384363346 | 3.056620981 | 0.002238471 | 0.035420422 |
| RN7SL444P     | 3.834230375 | 1.174459451 | 0.358612508 | 3.275009727 | 0.001056583 | 0.023006818 |
| RP11-252K23.2 | 3.469437923 | 1.174448469 | 0.362799621 | 3.237182182 | 0.001207163 | 0.024803745 |
| AC002400.1    | 19.76648421 | 1.174322259 | 0.31793408  | 3.69360296  | 0.000221099 | 0.009207657 |
| MTND5P14      | 18.06400797 | 1.173956525 | 0.364475249 | 3.220949928 | 0.001277665 | 0.0257759   |
| CTD-3037G24.3 | 7.704042816 | 1.173586973 | 0.340378653 | 3.447886529 | 0.000564991 | 0.016042002 |
| PKN2-AS1      | 4.910271799 | 1.173384759 | 0.353630452 | 3.318110052 | 0.000906288 | 0.020841432 |
| RP11-553K8.5  | 18.82658015 | 1.172867193 | 0.328327393 | 3.572248977 | 0.000353929 | 0.012294598 |
| MIR5695       | 2.498703927 | 1.172135583 | 0.384611373 | 3.047584305 | 0.002306888 | 0.035853857 |
| RNA5SP151     | 5.476269558 | 1.171749479 | 0.376206575 | 3.114643805 | 0.001841672 | 0.031534865 |
| RP11-95O2.1   | 6.442186216 | 1.170906683 | 0.340633286 | 3.437440586 | 0.00058724  | 0.016463442 |
| GDF15         | 8.031195318 | 1.170877478 | 0.339344093 | 3.450413616 | 0.000559728 | 0.015953691 |
| ABCA1         | 1078.596388 | 1.168588436 | 0.189214223 | 6.176007386 | 6.57429E-10 | 2.08799E-06 |
| HBQ1          | 16.38384015 | 1.168546673 | 0.371689617 | 3.143877634 | 0.001667251 | 0.029892204 |
| RP11-101O6.2  | 5.409680244 | 1.168225158 | 0.33816203  | 3.454631373 | 0.000551046 | 0.015827968 |
| IFIT5         | 1800.318418 | 1.167177181 | 0.1803374   | 6.472185915 | 9.65952E-11 | 5.42795E-07 |
| KCNN3         | 17.57720563 | 1.167160543 | 0.371832337 | 3.13894308  | 0.001695584 | 0.030084772 |
| AC159540.14   | 4.895976931 | 1.166832403 | 0.348108711 | 3.351919575 | 0.000802533 | 0.019456838 |
| RLBP1         | 4.085787386 | 1.165107635 | 0.370824125 | 3.141941307 | 0.001678317 | 0.029975197 |
| RP11-17G12.2  | 12.87463373 | 1.164861636 | 0.264734601 | 4.400111025 | 1.08196E-05 | 0.001606832 |
| OR2W3         | 59.84834792 | 1.164673265 | 0.369951608 | 3.148177324 | 0.00164292  | 0.029603469 |
| RP11-5P18.1   | 3.232788095 | 1.164157318 | 0.379218692 | 3.0698838   | 0.002141421 | 0.034585406 |
| PLN           | 5.355443347 | 1.163148754 | 0.374991041 | 3.101804118 | 0.001923452 | 0.03251877  |
| CA1           | 196.9950293 | 1.162009884 | 0.381828082 | 3.04328031  | 0.002340142 | 0.036054086 |
| RP11-476D10.1 | 13.29266177 | 1.161824691 | 0.347968505 | 3.33887888  | 0.000841172 | 0.020019134 |
| OLR1          | 30.74623398 | 1.161373426 | 0.361595494 | 3.211802816 | 0.001319049 | 0.026206517 |
| RP11-39K24.12 | 18.70097077 | 1.159016459 | 0.352267451 | 3.29016052  | 0.001001302 | 0.022260956 |
| CXCL1         | 204.9891042 | 1.1576776   | 0.314530268 | 3.680655629 | 0.000232635 | 0.009489801 |
| HNRNPA3P15    | 7.970690331 | 1.157002172 | 0.340443029 | 3.398519206 | 0.000677517 | 0.017637657 |
| IGKV5-2       | 42.16972757 | 1.156280764 | 0.365486865 | 3.163672557 | 0.00155792  | 0.028887131 |
| EMP1          | 423.6670439 | 1.156172476 | 0.300727316 | 3.844587482 | 0.000120755 | 0.006484623 |
| CARS-AS1      | 6.765605032 | 1.156075028 | 0.325389696 | 3.552893783 | 0.000381018 | 0.012738043 |
| HESX1         | 28.35788735 | 1.155568223 | 0.358263899 | 3.22546655  | 0.001257675 | 0.025548203 |
| TWIST1        | 2.453566289 | 1.15458716  | 0.381562391 | 3.025945917 | 0.002478566 | 0.037206946 |
| MYBL2         | 512.1121063 | 1.152712654 | 0.343820277 | 3.352660476 | 0.000800388 | 0.019426017 |
| RPL23AP81     | 13.76454906 | 1.151893935 | 0.314804783 | 3.659073809 | 0.000253128 | 0.010114985 |
| RP11-153M7.5  | 3.135915523 | 1.151334976 | 0.373646446 | 3.08134866  | 0.002060652 | 0.033859878 |
| RP11-214O1.3  | 7.441649795 | 1.150965627 | 0.350986241 | 3.27923289  | 0.001040897 | 0.022799233 |
| E2F8          | 29.93927793 | 1.150961509 | 0.348403378 | 3.303531424 | 0.000954753 | 0.021573765 |
| RPL13AP6      | 2.291336906 | 1.150774052 | 0.384559175 | 2.992449864 | 0.002767481 | 0.040108632 |
| RN7SKP163     | 3.078843584 | 1.148812993 | 0.385184098 | 2.982503688 | 0.002859012 | 0.040849329 |
| EHD4-AS1      | 10.31408789 | 1.148521431 | 0.344150119 | 3.337268734 | 0.000846061 | 0.020052908 |

|                |             |             |             |             |             |             |
|----------------|-------------|-------------|-------------|-------------|-------------|-------------|
| TRAJ34         | 3.457324932 | 1.146077805 | 0.370276245 | 3.095196681 | 0.001966824 | 0.032926534 |
| HBA2           | 5492.496985 | 1.145767887 | 0.384783439 | 2.977695431 | 0.002904244 | 0.041206788 |
| GYPA           | 4.433980548 | 1.145152103 | 0.380935371 | 3.006158496 | 0.002645711 | 0.038847764 |
| snoU13         | 6.079964786 | 1.144922787 | 0.355908679 | 3.21690044  | 0.001295836 | 0.025884112 |
| MIR5685        | 11.12468644 | 1.144367216 | 0.284549704 | 4.021677764 | 5.77851E-05 | 0.004239861 |
| RNU6-118P      | 18.08133756 | 1.142282524 | 0.307546393 | 3.714179551 | 0.000203864 | 0.008904332 |
| IGLV3-21       | 576.7265046 | 1.142040509 | 0.384380828 | 2.971117248 | 0.002967185 | 0.041566762 |
| PGLYRP1        | 59.62832732 | 1.142008926 | 0.374816681 | 3.046846591 | 0.002312557 | 0.035853857 |
| AP000350.6     | 3.098518201 | 1.141379541 | 0.385063109 | 2.964136302 | 0.003035338 | 0.042130929 |
| AC096558.1     | 4.1234374   | 1.141184945 | 0.380590537 | 2.998458538 | 0.002713491 | 0.039608998 |
| RP11-39K24.13  | 20.02534671 | 1.140962006 | 0.344732883 | 3.309698791 | 0.000933964 | 0.021273801 |
| LYG2           | 8.348628194 | 1.140351066 | 0.322914127 | 3.531437528 | 0.000413307 | 0.013238194 |
| AC093732.1     | 5.816574013 | 1.137485338 | 0.356451609 | 3.191135369 | 0.001417149 | 0.027207296 |
| FOX1           | 4.886970555 | 1.137195671 | 0.382011724 | 2.976860659 | 0.002912163 | 0.041206788 |
| AC083884.8     | 13.03240904 | 1.136653652 | 0.333382838 | 3.409454599 | 0.000650929 | 0.017351866 |
| TNFRSF12A      | 89.85088455 | 1.13501239  | 0.353662483 | 3.209309562 | 0.001330542 | 0.026364171 |
| AP000662.9     | 2.68297735  | 1.134955238 | 0.383173405 | 2.96198855  | 0.003056592 | 0.042233774 |
| SLC4A1         | 377.9214367 | 1.134594081 | 0.381824677 | 2.971505378 | 0.002963437 | 0.041540434 |
| SPATA21        | 8.624922799 | 1.132697921 | 0.304258866 | 3.722809913 | 0.000197018 | 0.008707954 |
| SYN2           | 8.09963006  | 1.130779097 | 0.344310508 | 3.284184104 | 0.001022781 | 0.022580401 |
| RPS20P31       | 3.710641208 | 1.129141921 | 0.373897498 | 3.019923715 | 0.002528384 | 0.037613164 |
| CTD-3105H18.11 | 2.36063451  | 1.128591135 | 0.380739143 | 2.964210947 | 0.003034602 | 0.042130929 |
| RP11-345J4.6   | 4.423187635 | 1.128383895 | 0.356526967 | 3.164932813 | 0.001551188 | 0.028810363 |
| CTC-265F19.1   | 2.543197688 | 1.127308249 | 0.385219943 | 2.926401582 | 0.00342908  | 0.045136355 |
| LINC00593      | 3.178504062 | 1.126823119 | 0.375821639 | 2.998292281 | 0.002714972 | 0.039608998 |
| AC110781.3     | 12.76002908 | 1.125916362 | 0.378463805 | 2.974964439 | 0.002930225 | 0.041283121 |
| BATF2          | 101.4620068 | 1.125456955 | 0.337461255 | 3.335070141 | 0.000852779 | 0.020126305 |
| CTD-2542L18.1  | 7.818913652 | 1.122523266 | 0.377039611 | 2.97720248  | 0.002908918 | 0.041206788 |
| KLHDC7B        | 686.1215715 | 1.122457136 | 0.280019384 | 4.008497987 | 6.11062E-05 | 0.004439582 |
| RRM2           | 542.8652932 | 1.121927508 | 0.350682823 | 3.199265643 | 0.001377782 | 0.026851556 |
| CD83           | 5704.646675 | 1.120591462 | 0.331384636 | 3.381543196 | 0.000720799 | 0.01828303  |
| TMOD1          | 59.51538254 | 1.119938744 | 0.365150084 | 3.06706418  | 0.002161724 | 0.034800475 |
| UBE2CP1        | 5.604060961 | 1.119637582 | 0.350501783 | 3.194384838 | 0.001401292 | 0.027137212 |
| RYKP1          | 3.832249926 | 1.119558326 | 0.367239503 | 3.048578156 | 0.002299271 | 0.035796493 |
| HBM            | 35.33479996 | 1.118742662 | 0.382193999 | 2.927159154 | 0.003420738 | 0.045101551 |
| MOXD1          | 80.71857588 | 1.118648683 | 0.3448034   | 3.244308738 | 0.001177361 | 0.024443649 |
| CA4            | 33.40177725 | 1.11489146  | 0.348078328 | 3.202990162 | 0.001360086 | 0.026673323 |
| FOSL1          | 295.2398749 | 1.114798721 | 0.356955376 | 3.123075871 | 0.001789716 | 0.030988292 |
| TCF3P1         | 34.80061331 | 1.112321194 | 0.315214244 | 3.528778327 | 0.000417483 | 0.01331632  |
| RNF182         | 10.32673006 | 1.111452048 | 0.380453082 | 2.921390577 | 0.003484727 | 0.045616387 |
| RP11-114M5.1   | 26.08015317 | 1.110963333 | 0.284094581 | 3.910540385 | 9.20899E-05 | 0.005567857 |
| MIR199A1       | 6.773905528 | 1.110489015 | 0.352367175 | 3.151510965 | 0.001624281 | 0.029418065 |
| TKTL2          | 8.403642724 | 1.110223832 | 0.345450791 | 3.213840761 | 0.001309723 | 0.026067823 |
| ETV7           | 150.4753734 | 1.109907411 | 0.336750623 | 3.295932765 | 0.000980955 | 0.021962325 |
| BACH1-IT2      | 7.865584048 | 1.107743947 | 0.320373613 | 3.457662877 | 0.000544883 | 0.015752709 |
| ASPM           | 169.3259813 | 1.107407784 | 0.324438181 | 3.413309062 | 0.000641791 | 0.017170037 |
| SCARNA3        | 2.344171768 | 1.10740373  | 0.384663094 | 2.878892586 | 0.003990742 | 0.049548364 |
| SLCO5A1        | 16.87603684 | 1.107187584 | 0.315714368 | 3.506928089 | 0.000453312 | 0.013871974 |
| AC004893.10    | 10.35963473 | 1.10712403  | 0.324972919 | 3.406819354 | 0.000657246 | 0.017429274 |
| RP11-468E2.4   | 120.2352962 | 1.106857729 | 0.207073809 | 5.345232853 | 9.03009E-08 | 5.73591E-05 |
| IGLV4-60       | 37.60601892 | 1.106816256 | 0.379485792 | 2.916621069 | 0.003538454 | 0.046080156 |
| SNORD71        | 4.380624759 | 1.103142276 | 0.377871045 | 2.919361755 | 0.003507489 | 0.045815806 |
| LCN2           | 233.3353996 | 1.102714805 | 0.37006481  | 2.979788336 | 0.002884476 | 0.041081454 |
| TMEM14E        | 7.499303527 | 1.102603663 | 0.336303972 | 3.278592454 | 0.001043262 | 0.022828541 |

|               |             |             |             |             |             |             |
|---------------|-------------|-------------|-------------|-------------|-------------|-------------|
| RP11-363N22.2 | 2.339923436 | 1.102169899 | 0.380233705 | 2.898664382 | 0.003747558 | 0.047702666 |
| HES4          | 287.0011161 | 1.101564879 | 0.366458064 | 3.005977999 | 0.002647282 | 0.038847764 |
| BHLHA15       | 54.67760194 | 1.101140924 | 0.376939014 | 2.921270774 | 0.003486067 | 0.045616387 |
| RP11-182110.2 | 3.282130614 | 1.100946833 | 0.378929294 | 2.905414944 | 0.003667665 | 0.047269294 |
| MIR1285-1     | 12.55980157 | 1.100121169 | 0.343477245 | 3.202893889 | 0.001360541 | 0.026673323 |
| RP11-152L20.3 | 16.54360385 | 1.099036237 | 0.281652089 | 3.902105755 | 9.53595E-05 | 0.005683732 |
| CTD-2024I7.13 | 7.529370153 | 1.098515981 | 0.370141699 | 2.967825525 | 0.002999145 | 0.041803759 |
| ANGPTL1       | 22.1453631  | 1.097841134 | 0.33750221  | 3.252841317 | 0.001142573 | 0.024054621 |
| RTEL1P1       | 5.066283849 | 1.094508751 | 0.369090422 | 2.965421712 | 0.003022683 | 0.042026442 |
| RP5-850O15.3  | 5.514452115 | 1.093595902 | 0.353980043 | 3.089428132 | 0.002005422 | 0.033422181 |
| RP11-667K14.5 | 5.098599236 | 1.093213113 | 0.359669728 | 3.03949159  | 0.002369778 | 0.03633442  |
| HELZ2         | 6861.754868 | 1.092130134 | 0.202910833 | 5.382315565 | 7.35337E-08 | 5.06944E-05 |
| RP11-172E10.1 | 9.721306291 | 1.091723694 | 0.357735945 | 3.051758451 | 0.002275051 | 0.035643364 |
| LMOD2         | 10.30596145 | 1.091678679 | 0.294866102 | 3.702286128 | 0.000213665 | 0.00910002  |
| IGKV1-5       | 935.5178496 | 1.090538472 | 0.364195825 | 2.994373899 | 0.002750087 | 0.039960742 |
| MIR1250       | 2.989856237 | 1.089164157 | 0.374937344 | 2.904923119 | 0.003673433 | 0.047288805 |
| IGLV8-61      | 167.9559917 | 1.088992361 | 0.372538554 | 2.923166875 | 0.003464908 | 0.045446505 |
| PARP14        | 11049.07543 | 1.088592868 | 0.225249017 | 4.832841805 | 1.34598E-06 | 0.00038862  |
| NLRP9P        | 20.57283359 | 1.088104265 | 0.254893102 | 4.268865087 | 1.9647E-05  | 0.002228532 |
| RP11-439A17.9 | 34.85937529 | 1.08776295  | 0.29471393  | 3.690911219 | 0.000223452 | 0.009247567 |
| CTD-2288F12.1 | 8.876927365 | 1.087694616 | 0.284372619 | 3.824892216 | 0.000130829 | 0.006811703 |
| ANLN          | 51.87229852 | 1.087348052 | 0.299415793 | 3.631565455 | 0.000281707 | 0.010678834 |
| RP11-665G4.1  | 19.81912829 | 1.086594857 | 0.272607227 | 3.985935619 | 6.72147E-05 | 0.004699113 |
| TXNDC5        | 216.1657394 | 1.086131793 | 0.358651836 | 3.028373713 | 0.002458738 | 0.037009254 |
| RP11-96D1.9   | 19.39859797 | 1.08577188  | 0.32614117  | 3.329146949 | 0.000871124 | 0.020355114 |
| RNU6-920P     | 4.806249703 | 1.084223815 | 0.360385874 | 3.008508087 | 0.002625338 | 0.038729272 |
| CFAP58-AS1    | 17.60152249 | 1.08395067  | 0.308715917 | 3.511159003 | 0.000446157 | 0.013738189 |
| ERVFRD-1      | 6.962547377 | 1.083786677 | 0.357617348 | 3.030576346 | 0.002440875 | 0.036865167 |
| TSPAN1        | 4.121913495 | 1.083461714 | 0.354398363 | 3.057186003 | 0.002234256 | 0.035418255 |
| FAM20A        | 92.57317369 | 1.082013064 | 0.304078548 | 3.558334094 | 0.000373214 | 0.012648327 |
| RP11-296A18.5 | 10.07717262 | 1.081839298 | 0.349781192 | 3.092903    | 0.001982089 | 0.033132184 |
| MT2A          | 1676.641256 | 1.081456031 | 0.310292379 | 3.485280675 | 0.000491621 | 0.014668921 |
| RGS20         | 7.108164631 | 1.081246033 | 0.332466809 | 3.252192412 | 0.001145185 | 0.024064032 |
| MAFB          | 9767.309477 | 1.08108166  | 0.310479547 | 3.481973839 | 0.000497732 | 0.014773812 |
| RP11-213H15.1 | 5.012315504 | 1.080854967 | 0.372046434 | 2.905161479 | 0.003670637 | 0.047280183 |
| KCNJ15        | 363.201416  | 1.079960113 | 0.317743593 | 3.398841509 | 0.000676719 | 0.017637657 |
| GRIP2         | 2.950024991 | 1.079316001 | 0.374742076 | 2.880156967 | 0.003974772 | 0.049449993 |
| PGAP1         | 505.8746187 | 1.078303444 | 0.224374008 | 4.80583048  | 1.5411E-06  | 0.000428273 |
| RAP1GAP       | 15.97761419 | 1.077549468 | 0.352605903 | 3.055959812 | 0.002243413 | 0.035448161 |
| RN7SL431P     | 28.39913611 | 1.077535188 | 0.305428834 | 3.527941926 | 0.000418804 | 0.013320245 |
| MME           | 467.1344611 | 1.073568276 | 0.319357326 | 3.361652254 | 0.000774776 | 0.019172244 |
| SNORA72       | 5.600951015 | 1.072889421 | 0.367119898 | 2.92244966  | 0.003472898 | 0.045524445 |
| IGHD4-4       | 6.104688013 | 1.072705749 | 0.355486679 | 3.017569464 | 0.002548106 | 0.037867313 |
| DENND6A-AS1   | 3.568888885 | 1.071253608 | 0.365115205 | 2.934015331 | 0.003346077 | 0.044625063 |
| RP11-535C21.3 | 7.709344823 | 1.070342485 | 0.350228093 | 3.056129725 | 0.002242142 | 0.035448161 |
| ATP5G2P3      | 29.19504012 | 1.07034129  | 0.323089022 | 3.312837074 | 0.000923548 | 0.021102067 |
| HJURP         | 71.38483391 | 1.067690429 | 0.32757328  | 3.259394136 | 0.001116504 | 0.023715551 |
| RPS12P27      | 9.618854953 | 1.067318686 | 0.357168225 | 2.988280062 | 0.002805523 | 0.040370483 |
| GBP6          | 11.36682735 | 1.066679189 | 0.340866885 | 3.129313047 | 0.001752155 | 0.030552092 |
| SPDYE2B       | 29.17024029 | 1.065581844 | 0.355486379 | 2.997532137 | 0.002721752 | 0.039662672 |
| AC124914.3    | 7.062823447 | 1.064590969 | 0.366109678 | 2.907847112 | 0.003639262 | 0.047012246 |
| DOCK4         | 176.6094225 | 1.064207785 | 0.205318661 | 5.183200483 | 2.1811E-07  | 0.000107756 |
| FAM183B       | 14.87442517 | 1.063726806 | 0.308386864 | 3.449325926 | 0.000561988 | 0.015997588 |
| OR2L2         | 4.1606196   | 1.062829796 | 0.360075763 | 2.951683795 | 0.003160464 | 0.043212444 |

|                |             |             |             |             |             |             |
|----------------|-------------|-------------|-------------|-------------|-------------|-------------|
| SMG1P1         | 128.7611582 | 1.061396633 | 0.311607378 | 3.406198652 | 0.000658742 | 0.017429274 |
| RNU6-1024P     | 8.700615572 | 1.061346589 | 0.33157515  | 3.200923192 | 0.00136988  | 0.026809139 |
| IGHV3-33       | 230.8280593 | 1.061216507 | 0.34453621  | 3.080130549 | 0.002069099 | 0.033923455 |
| LKAAEAR1       | 10.44280955 | 1.057078381 | 0.347768383 | 3.039604617 | 0.002368889 | 0.03633442  |
| RP11-211N11.5  | 11.17667334 | 1.055963193 | 0.29120981  | 3.626125078 | 0.000287706 | 0.010841154 |
| RP11-254B13.4  | 12.32024141 | 1.055755693 | 0.360264433 | 2.930502144 | 0.003384147 | 0.044897716 |
| CKAP2L         | 43.80166154 | 1.055451418 | 0.323815711 | 3.259420044 | 0.001116402 | 0.023715551 |
| TRAJ29         | 5.941316577 | 1.055400579 | 0.364044374 | 2.899098719 | 0.00374237  | 0.047702666 |
| RP11-153M7.1   | 11.16946037 | 1.054758496 | 0.310288563 | 3.399282541 | 0.000675629 | 0.017637657 |
| RNU6-481P      | 3.727791687 | 1.054348694 | 0.356983404 | 2.953494983 | 0.003141977 | 0.043039086 |
| NFE4           | 12.17571999 | 1.053481385 | 0.348723357 | 3.020965938 | 0.002519697 | 0.037570694 |
| MIR553         | 8.944184628 | 1.053225609 | 0.345981426 | 3.044168064 | 0.002333248 | 0.035972787 |
| RNU2-6P        | 4.361828123 | 1.051748722 | 0.363948141 | 2.889831278 | 0.003854486 | 0.048716852 |
| RP11-128B16.3  | 32.37328274 | 1.051667888 | 0.298380292 | 3.524588974 | 0.00042414  | 0.013432319 |
| RNA5SP395      | 5.350643409 | 1.050264584 | 0.363425428 | 2.889903958 | 0.003853595 | 0.048716852 |
| PARP9          | 5218.945311 | 1.050134099 | 0.256258941 | 4.097941309 | 4.16841E-05 | 0.003394582 |
| CNTD2          | 17.34993415 | 1.049712915 | 0.295274872 | 3.555036387 | 0.000377927 | 0.012680929 |
| OAS2           | 9799.110246 | 1.048730918 | 0.283619006 | 3.697675034 | 0.000217583 | 0.009144252 |
| PKMYT1         | 77.44184952 | 1.048687214 | 0.308791106 | 3.396105636 | 0.00068352  | 0.017715748 |
| RP11-173A16.1  | 36.40132066 | 1.04851177  | 0.260427656 | 4.026115298 | 5.67059E-05 | 0.004202285 |
| LINC00534      | 11.74229966 | 1.047759524 | 0.340139111 | 3.080385317 | 0.00206733  | 0.033923455 |
| TRAJ16         | 6.27302124  | 1.04773148  | 0.364314646 | 2.875897224 | 0.004028809 | 0.0496274   |
| TCTEX1D4       | 64.45838553 | 1.044558945 | 0.295744129 | 3.531968487 | 0.000412479 | 0.013232644 |
| FN1            | 170.5471511 | 1.044293171 | 0.362971223 | 2.877068775 | 0.004013881 | 0.049548364 |
| CD300LD        | 9.650394275 | 1.043801676 | 0.351146276 | 2.972555166 | 0.002953321 | 0.041503312 |
| S100A3         | 6.512295822 | 1.043776483 | 0.330349919 | 3.159608718 | 0.001579811 | 0.028970825 |
| SMTNL1         | 147.8827139 | 1.043231084 | 0.256259452 | 4.070995524 | 4.68126E-05 | 0.003651715 |
| TAS1R1         | 8.507962879 | 1.042669126 | 0.306490941 | 3.401957406 | 0.000669051 | 0.017561197 |
| CFAP58         | 9.932223966 | 1.042565143 | 0.319184899 | 3.26633605  | 0.001089489 | 0.023561784 |
| DLGAP5         | 83.22011931 | 1.042060965 | 0.351651797 | 2.963331833 | 0.003043283 | 0.042180965 |
| RP11-874J12.4  | 17.89044505 | 1.041589412 | 0.353608074 | 2.945604154 | 0.003223246 | 0.043641849 |
| MIR133A1HG     | 5.957730605 | 1.041444602 | 0.342925888 | 3.036937828 | 0.002389947 | 0.036467847 |
| RP4-803J11.2   | 4.085038897 | 1.041016441 | 0.361082497 | 2.883043212 | 0.003938534 | 0.0492195   |
| KIF20A         | 36.07096596 | 1.03891524  | 0.33801681  | 3.073560871 | 0.002115205 | 0.034322641 |
| CTB-102L5.7    | 11.43556311 | 1.037767994 | 0.35022987  | 2.963105331 | 0.003045523 | 0.042185717 |
| CHRNA          | 10.29971357 | 1.034699788 | 0.288241738 | 3.589694527 | 0.000331066 | 0.011833204 |
| AC127904.2     | 19.28716485 | 1.033166285 | 0.31803226  | 3.248621018 | 0.001159659 | 0.024219076 |
| ARG1           | 89.17916078 | 1.032605025 | 0.279473936 | 3.694816912 | 0.000220045 | 0.009207657 |
| RP11-1094M14.7 | 26.78774222 | 1.032341521 | 0.266599762 | 3.872252221 | 0.000107834 | 0.00603872  |
| SKA1           | 66.57313758 | 1.031888956 | 0.317489005 | 3.250156508 | 0.001153415 | 0.02416845  |
| BTNL8          | 42.82140223 | 1.030399313 | 0.338304606 | 3.045773827 | 0.002320823 | 0.035920348 |
| RN7SKP287      | 7.51309676  | 1.029740651 | 0.322606628 | 3.191938918 | 0.001413212 | 0.027197697 |
| CDC42-IT1      | 16.71993364 | 1.02945647  | 0.353568711 | 2.911616435 | 0.003595639 | 0.046611218 |
| RP1-68D18.2    | 48.48794842 | 1.027454259 | 0.256514256 | 4.005447007 | 6.19003E-05 | 0.004468077 |
| IGHV1-24       | 112.1594701 | 1.024315422 | 0.33294862  | 3.076496974 | 0.002094484 | 0.034163298 |
| RP11-420A6.2   | 8.25703197  | 1.023623353 | 0.30002627  | 3.411779085 | 0.000645404 | 0.017237202 |
| MX2            | 6579.031611 | 1.023608879 | 0.233404513 | 4.385557362 | 1.15689E-05 | 0.001627849 |
| RP5-867C24.1   | 15.85818306 | 1.023459974 | 0.294572423 | 3.474391679 | 0.000512013 | 0.015139336 |
| MKI67          | 853.850526  | 1.022997971 | 0.343347485 | 2.979482934 | 0.002887353 | 0.041081454 |
| IGLV3-25       | 271.7654603 | 1.022828698 | 0.353826263 | 2.890765341 | 0.00384305  | 0.048655284 |
| BRCA2          | 268.2662159 | 1.02210645  | 0.162468485 | 6.291105947 | 3.15212E-10 | 1.16797E-06 |
| RP11-39K24.14  | 24.23272538 | 1.021746711 | 0.351086855 | 2.910239153 | 0.003611523 | 0.04678583  |
| RP13-638C3.2   | 15.33722583 | 1.021609579 | 0.279478339 | 3.655415952 | 0.000256765 | 0.010157307 |
| REC8           | 1413.334694 | 1.02134028  | 0.195614432 | 5.221190844 | 1.77776E-07 | 9.41029E-05 |

|               |             |              |             |              |             |             |
|---------------|-------------|--------------|-------------|--------------|-------------|-------------|
| CFLAR-AS1     | 88.02106213 | 1.019861731  | 0.269726928 | 3.781089776  | 0.000156143 | 0.007612673 |
| AC015987.1    | 12.09938081 | 1.019781427  | 0.302120677 | 3.375410906  | 0.000737056 | 0.018515501 |
| PPP1R26P1     | 18.53869219 | 1.019627338  | 0.326650354 | 3.121464058  | 0.001799542 | 0.031089512 |
| RP11-271C24.3 | 15.60036552 | 1.019130637  | 0.297355425 | 3.427314757  | 0.000609582 | 0.016814179 |
| SPATA3-AS1    | 11.59972308 | 1.019093631  | 0.351879484 | 2.896143932  | 0.003777791 | 0.047993055 |
| PDCD1LG2      | 23.62455726 | 1.016464802  | 0.304890488 | 3.333868527  | 0.000856471 | 0.020192015 |
| RP11-209D14.4 | 7.134250079 | 1.01486394   | 0.312869129 | 3.243733068  | 0.001179742 | 0.024443649 |
| BTBD19        | 198.7183975 | 1.014850566  | 0.234581038 | 4.326225912  | 1.51686E-05 | 0.001916068 |
| RN7SL34P      | 3.458308853 | 1.013855196  | 0.352571554 | 2.875601237  | 0.004032588 | 0.0496274   |
| RP11-354M20.3 | 14.42590847 | 1.012030883  | 0.324941523 | 3.114501563  | 0.00184256  | 0.031534865 |
| SNORA76A      | 12.11008949 | 1.0116153    | 0.295454098 | 3.423933895  | 0.000617216 | 0.016940683 |
| SHC2          | 51.63555552 | 1.011329593  | 0.350249821 | 2.887452132  | 0.003883757 | 0.04883987  |
| RMI2          | 80.88948673 | 1.010011797  | 0.261933147 | 3.855990769  | 0.000115262 | 0.006324569 |
| CENPA         | 26.06487843 | 1.007270723  | 0.328470087 | 3.066552365  | 0.002165429 | 0.034834886 |
| AC106900.6    | 7.195582621 | 1.004681283  | 0.337247284 | 2.97906412   | 0.002891303 | 0.041099387 |
| ADORA2A       | 31.68767933 | 1.002663654  | 0.242453038 | 4.135496344  | 3.54188E-05 | 0.003093386 |
| CDT1          | 124.4165906 | 1.002271478  | 0.312923452 | 3.202928611  | 0.001360377 | 0.026673323 |
| AC073130.3    | 8.895402476 | 1.002107987  | 0.298350893 | 3.358823494  | 0.00078275  | 0.019228849 |
| CEP55         | 83.35172069 | 1.001748482  | 0.337962578 | 2.964081075  | 0.003035883 | 0.042130929 |
| DPF1          | 6.3955727   | 1.001667278  | 0.326961155 | 3.063566613  | 0.002187155 | 0.034968422 |
| SPTSSB        | 50.98711969 | -1.003106054 | 0.305030522 | -3.288543219 | 0.001007073 | 0.022332498 |
| CYYR1         | 11.68142914 | -1.008145572 | 0.325539492 | -3.096845689 | 0.001955917 | 0.032800957 |
| LINC00638     | 17.55423112 | -1.012647034 | 0.271855826 | -3.724941453 | 0.000195361 | 0.008651904 |
| ZNF600        | 872.3194551 | -1.032457236 | 0.274366557 | -3.763057889 | 0.000167848 | 0.00782403  |
| RP3-467K16.4  | 32.19094997 | -1.032651469 | 0.28117671  | -3.672606704 | 0.000240089 | 0.009758054 |
| FAM166A       | 6.144218706 | -1.034926988 | 0.351370247 | -2.945403025 | 0.003225342 | 0.043641849 |
| TIFAB         | 32.71633164 | -1.037338419 | 0.286284666 | -3.623450866 | 0.000290698 | 0.010916905 |
| CTB-39G8.3    | 27.38931745 | -1.0389451   | 0.354950987 | -2.927010033 | 0.003422378 | 0.045101551 |
| RPL4P4        | 6.565133148 | -1.039655586 | 0.359488212 | -2.892043607 | 0.003827448 | 0.04851485  |
| FSIP1         | 15.00992361 | -1.041708036 | 0.311206209 | -3.347324075 | 0.000815958 | 0.019675021 |
| UNC45B        | 30.92963921 | -1.04316147  | 0.206243913 | -5.057901867 | 4.23894E-07 | 0.000165334 |
| RP11-73G16.2  | 7.974467284 | -1.043817548 | 0.353761116 | -2.950628264 | 0.003171283 | 0.043307109 |
| TMC2          | 2.721693924 | -1.050831916 | 0.354695548 | -2.962630692 | 0.003050223 | 0.04219823  |
| EEF1A1P6      | 145.8712588 | -1.053259259 | 0.295476721 | -3.564609951 | 0.000364398 | 0.012514789 |
| KCNK10        | 10.13681137 | -1.059570788 | 0.319342192 | -3.31797932  | 0.000906712 | 0.020841432 |
| CDHR1         | 101.6536302 | -1.065195201 | 0.223780265 | -4.760005096 | 1.93588E-06 | 0.000500448 |
| FAT4          | 44.17420703 | -1.070546716 | 0.343712398 | -3.114658425 | 0.00184158  | 0.031534865 |
| FAM221B       | 6.524002705 | -1.090491782 | 0.353288525 | -3.086688934 | 0.002023993 | 0.033555114 |
| CELA1         | 15.32156    | -1.091534511 | 0.311734908 | -3.501483101 | 0.000462676 | 0.013994857 |
| RP11-203M5.6  | 36.73916907 | -1.092135162 | 0.360135614 | -3.032566397 | 0.002424837 | 0.036722743 |
| TRBJ2-5       | 2.97021598  | -1.092401242 | 0.338978067 | -3.222631044 | 0.00127019  | 0.02573422  |
| CXXC4         | 7.25733952  | -1.093084441 | 0.349696822 | -3.125806048 | 0.001773185 | 0.03080525  |
| KRT81         | 2.486982253 | -1.095875281 | 0.375647013 | -2.917300664 | 0.003530752 | 0.046038527 |
| RP11-629G13.1 | 2.313135035 | -1.107809689 | 0.385017836 | -2.877294464 | 0.004011011 | 0.049548364 |
| C10orf82      | 6.27300668  | -1.113061463 | 0.37985756  | -2.930207481 | 0.003387357 | 0.044897716 |
| CD207         | 5.979557809 | -1.124831601 | 0.336615569 | -3.341591135 | 0.000832997 | 0.019870367 |
| SLC12A3       | 40.91568809 | -1.129379919 | 0.286303272 | -3.944697907 | 7.99006E-05 | 0.005209241 |
| RP11-495K9.7  | 4.39107231  | -1.130856866 | 0.380523781 | -2.971842819 | 0.002960182 | 0.041537925 |
| TRDV2         | 71.52765513 | -1.137292001 | 0.378296182 | -3.006353369 | 0.002644015 | 0.038847764 |
| NPM1P27       | 5.140881015 | -1.142384467 | 0.371514196 | -3.074941632 | 0.002105438 | 0.034279584 |
| LILRA4        | 162.087098  | -1.152211671 | 0.267159969 | -4.312815565 | 1.61189E-05 | 0.00200198  |
| AC008984.6    | 2.669520788 | -1.152562251 | 0.384679497 | -2.996162416 | 0.002734008 | 0.039805147 |
| LIM2          | 21.86997457 | -1.166961826 | 0.29450787  | -3.962413046 | 7.4196E-05  | 0.005011804 |
| RPL7AP6       | 28.0651545  | -1.17159163  | 0.344463851 | -3.401203425 | 0.000670899 | 0.017588942 |

|               |             |              |             |              |             |             |
|---------------|-------------|--------------|-------------|--------------|-------------|-------------|
| SLC4A3        | 72.75342094 | -1.171650283 | 0.253124018 | -4.628759825 | 3.67862E-06 | 0.000763287 |
| AC074183.4    | 2.846063616 | -1.18048347  | 0.370081351 | -3.189794531 | 0.00142374  | 0.027286709 |
| SLC16A2       | 5.166760936 | -1.181522244 | 0.323370957 | -3.653767345 | 0.00025842  | 0.010180664 |
| CLEC4C        | 79.06933966 | -1.182972048 | 0.243522792 | -4.857746731 | 1.18729E-06 | 0.000356701 |
| SMOC1         | 4.514577344 | -1.188712876 | 0.360499426 | -3.297405742 | 0.000975824 | 0.02188902  |
| SLC34A1       | 5.801401484 | -1.191063686 | 0.326753047 | -3.645149437 | 0.000267236 | 0.010404906 |
| COL13A1       | 22.52995926 | -1.195915245 | 0.349947722 | -3.417411147 | 0.000632197 | 0.017069152 |
| RP5-1171110.5 | 682.029867  | -1.196764678 | 0.256708454 | -4.661960529 | 3.13211E-06 | 0.000682678 |
| PRICKLE2      | 6.920721503 | -1.199968375 | 0.308936621 | -3.884189485 | 0.000102672 | 0.005880325 |
| SHISA3        | 3.003691887 | -1.207805681 | 0.381526883 | -3.165715801 | 0.001547019 | 0.028756955 |
| EEF1A1P9      | 8.818205733 | -1.218885237 | 0.383520309 | -3.178150434 | 0.001482178 | 0.028040659 |
| AC007228.9    | 2.493249364 | -1.228038385 | 0.385082588 | -3.189025998 | 0.00142753  | 0.027316329 |
| SORBS2        | 9.831922557 | -1.241056484 | 0.364221309 | -3.407424148 | 0.000655791 | 0.017420088 |
| FEZ1          | 78.65039959 | -1.252376894 | 0.285226536 | -4.390814791 | 1.12927E-05 | 0.001618941 |
| RP4-622L5.7   | 2.29578805  | -1.254561524 | 0.355289613 | -3.531095416 | 0.000413842 | 0.013238194 |
| RGS17         | 4.85512619  | -1.290699758 | 0.321630074 | -4.012994628 | 5.99533E-05 | 0.004370103 |
| KCNA5         | 5.368428962 | -1.308056588 | 0.333591587 | -3.921131827 | 8.8134E-05  | 0.005489492 |
| RPS2P7        | 5.268256184 | -1.316133479 | 0.375396271 | -3.505984424 | 0.000454922 | 0.013871974 |
| SIGLEC17P     | 193.9998462 | -1.325627089 | 0.288761753 | -4.590729475 | 4.417E-06   | 0.000867816 |
| LDB2          | 25.48559162 | -1.33613226  | 0.337348486 | -3.960688471 | 7.4734E-05  | 0.005011804 |
| DNASE1L3      | 46.73660682 | -1.342787966 | 0.283143283 | -4.742432699 | 2.11167E-06 | 0.000518198 |
| CHL1          | 14.2613269  | -1.346225388 | 0.365426287 | -3.683986175 | 0.000229615 | 0.009418439 |
| HTR3A         | 9.128040474 | -1.351287215 | 0.312616398 | -4.322509069 | 1.54265E-05 | 0.001928315 |
| AC007405.4    | 2.759416613 | -1.354727183 | 0.3845915   | -3.522509425 | 0.000427482 | 0.01346144  |
| CTD-2616J11.2 | 3.692457041 | -1.407084514 | 0.311760129 | -4.513356212 | 6.38097E-06 | 0.001082914 |
| SAXO2         | 51.52826268 | -1.517367825 | 0.373117563 | -4.066728498 | 4.76777E-05 | 0.003706194 |

## Additional file 2: Table S2: METTL1-coexpressed DEGs in dataset

LAMP3  
CD83  
BCL2L14  
SLCO5A1  
BRCA2  
TMC2  
CYR1  
SIGLEC17P  
RMI2  
OR56B2P  
GBP6  
PGAP1  
PDCD1LG2  
MAFB  
LINC00487  
MIR23A  
H2AFZP1  
RNU2-6P  
RPL4P4  
EEF1A1P6  
SRGAP2-AS1  
RPS2P7  
RPL23AP81  
EEF1A1P9  
NPM1P27  
RNA5SP395  
IGLV1-70  
TIFAB  
TMEM178B  
RN7SL431P  
IGKV5-2  
IGKV3D-20  
IGLV4-60  
IGLV3-19  
IGKV2D-30



### Additional file 3: Table 3: Analysis of immune cell infiltration by ssGSEA in dataset

| Sample   | Activated B cell | Activated CD4 T cell | Activated CD8 T cell | Activated dendritic cell | CD56bright natural killer | CD56dim natural killer | CD56dim natural killer c |
|----------|------------------|----------------------|----------------------|--------------------------|---------------------------|------------------------|--------------------------|
| Healthy1 | 0.514913704      | 0.521763036          | 0.828236646          | 0.389477446              | 0.354501236               | 0.45173585             |                          |
| Healthy2 | 0.482908458      | 0.473699396          | 0.813190449          | 0.375567922              | 0.346586682               | 0.457654468            |                          |
| Healthy3 | 0.455907053      | 0.466502222          | 0.810158366          | 0.440846641              | 0.373770863               | 0.446918342            |                          |
| Healthy4 | 0.469915495      | 0.464159097          | 0.798092148          | 0.374031403              | 0.337945115               | 0.416186078            |                          |
| Healthy5 | 0.384480305      | 0.448871588          | 0.75708154           | 0.447779233              | 0.340651726               | 0.422003334            |                          |
| Healthy6 | 0.426240878      | 0.439945075          | 0.762616854          | 0.404920767              | 0.359161438               | 0.435574087            |                          |
| SLE1     | 0.420139605      | 0.536437647          | 0.801310967          | 0.396012832              | 0.308718177               | 0.40095213             |                          |
| SLE2     | 0.460102281      | 0.409733752          | 0.762071732          | 0.430473818              | 0.330668429               | 0.401217584            |                          |
| SLE3     | 0.505998357      | 0.426413686          | 0.763257517          | 0.41493619               | 0.350276578               | 0.425931345            |                          |
| SLE4     | 0.352521974      | 0.483889641          | 0.792341738          | 0.44991469               | 0.359265207               | 0.421814118            |                          |
| SLE5     | 0.595522052      | 0.547529885          | 0.801494257          | 0.407591476              | 0.284708197               | 0.380356405            |                          |
| SLE6     | 0.3800401        | 0.513290147          | 0.796483646          | 0.452303911              | 0.292390887               | 0.392868261            |                          |
| SLE7     | 0.314466748      | 0.539440508          | 0.772350902          | 0.433634206              | 0.353371841               | 0.437709689            |                          |
| SLE8     | 0.525828685      | 0.625501837          | 0.821586244          | 0.418812894              | 0.294562133               | 0.385675228            |                          |
| SLE9     | 0.596616409      | 0.516701231          | 0.781603745          | 0.321562241              | 0.320339769               | 0.356486036            |                          |
| SLE10    | 0.606742817      | 0.559274525          | 0.796370355          | 0.424503177              | 0.320920376               | 0.403597885            |                          |
| SLE11    | 0.136459501      | 0.441191874          | 0.756663439          | 0.483044569              | 0.297944688               | 0.344103471            |                          |
| SLE12    | 0.406832617      | 0.435721547          | 0.76942708           | 0.448482279              | 0.308357841               | 0.43009715             |                          |
| SLE13    | 0.459092834      | 0.483252472          | 0.787308331          | 0.424246752              | 0.319653451               | 0.399744309            |                          |
| SLE14    | 0.481217853      | 0.485542212          | 0.768292894          | 0.389031649              | 0.318904082               | 0.371716875            |                          |
| SLE15    | 0.326866554      | 0.36379351           | 0.736853211          | 0.402765286              | 0.350601257               | 0.36604521             |                          |
| SLE16    | 0.491148862      | 0.499054137          | 0.747649756          | 0.424715936              | 0.308198532               | 0.389513776            |                          |
| SLE17    | 0.663565476      | 0.579787425          | 0.845712697          | 0.419902565              | 0.294704629               | 0.394954239            |                          |
| SLE18    | 0.405429173      | 0.506827714          | 0.786766483          | 0.43083193               | 0.368702434               | 0.429034517            |                          |
| SLE19    | 0.409923359      | 0.579055823          | 0.813774869          | 0.402381151              | 0.320577582               | 0.363544882            |                          |
| SLE20    | 0.376151839      | 0.558458044          | 0.796007533          | 0.4111590799             | 0.320345479               | 0.466459415            |                          |

| Central memory CD4 T | Central memory CD8 T | Effector memory CD4 T | Effector memory CD8 T | Eosinophil  | Gamma delta T cell |
|----------------------|----------------------|-----------------------|-----------------------|-------------|--------------------|
| 0.837214187          | 0.515284902          | 0.423724175           | 0.70462102            | 0.170238236 | 0.381718351        |
| 0.821770735          | 0.475090199          | 0.416534075           | 0.709619462           | 0.146129854 | 0.373205966        |
| 0.800559735          | 0.529321086          | 0.400371176           | 0.692574636           | 0.170839009 | 0.414634117        |
| 0.813603074          | 0.507474536          | 0.408666014           | 0.713405883           | 0.150227198 | 0.403942432        |
| 0.796006945          | 0.513414635          | 0.381746063           | 0.622136225           | 0.2139503   | 0.390815024        |
| 0.800670903          | 0.464779937          | 0.403383302           | 0.652693945           | 0.144480069 | 0.392531061        |
| 0.841330487          | 0.50611221           | 0.393224047           | 0.624235148           | 0.142290239 | 0.349254071        |
| 0.777785885          | 0.537297221          | 0.389667992           | 0.668346552           | 0.194893276 | 0.402147502        |
| 0.78540979           | 0.537589637          | 0.403620716           | 0.665730843           | 0.245694678 | 0.41154862         |
| 0.839621509          | 0.522752038          | 0.424685945           | 0.658251684           | 0.258429825 | 0.385454764        |
| 0.825689803          | 0.433196317          | 0.397979837           | 0.671972137           | 0.172671364 | 0.368908206        |
| 0.803294851          | 0.517842545          | 0.409993474           | 0.664497461           | 0.082761749 | 0.389350459        |
| 0.808842592          | 0.541003391          | 0.416763497           | 0.675201114           | 0.23501775  | 0.39353366         |
| 0.805318058          | 0.488838297          | 0.394170567           | 0.661626116           | 0.172581596 | 0.392562262        |
| 0.794742627          | 0.445811291          | 0.358331167           | 0.653374442           | 0.110062081 | 0.348202955        |
| 0.835981853          | 0.519836414          | 0.35798939            | 0.64048813            | 0.155945357 | 0.325361204        |
| 0.758012196          | 0.561021321          | 0.372766995           | 0.633847134           | 0.139950326 | 0.427547375        |
| 0.803276441          | 0.504262464          | 0.398757877           | 0.634430358           | 0.191425981 | 0.398208919        |
| 0.809675194          | 0.542729336          | 0.427002997           | 0.684534043           | 0.161870643 | 0.406687404        |
| 0.785954207          | 0.520579128          | 0.380001264           | 0.677045877           | 0.129702838 | 0.357326739        |
| 0.795461778          | 0.521728679          | 0.400736593           | 0.633639183           | 0.175788754 | 0.388789385        |
| 0.790220609          | 0.532979951          | 0.36900158            | 0.615380422           | 0.121544651 | 0.36587217         |
| 0.876339625          | 0.501815156          | 0.371708131           | 0.680885428           | 0.201911323 | 0.323088482        |
| 0.828425843          | 0.583545706          | 0.421603901           | 0.658168867           | 0.18794064  | 0.423606605        |
| 0.854379624          | 0.541705305          | 0.436509584           | 0.649998936           | 0.151437819 | 0.377468537        |
| 0.82284094           | 0.551555731          | 0.43771963            | 0.66299539            | 0.191380436 | 0.434068018        |

| Immature B cell | Immature dendritic cell | Macrophage  | Mast cell   | MDSC | Memory B cell |
|-----------------|-------------------------|-------------|-------------|------|---------------|
| 0.779456142     | 0.514627011             | 0.360917785 | 0.326658933 | 1    | 0.255642408   |
| 0.748855219     | 0.524652981             | 0.38971308  | 0.354992596 | 1    | 0.241873197   |
| 0.736698226     | 0.508991902             | 0.455175185 | 0.3801059   | 1    | 0.253445761   |
| 0.748236446     | 0.491762123             | 0.418815277 | 0.34123949  | 1    | 0.244709472   |
| 0.74075044      | 0.52116862              | 0.402378093 | 0.335622264 | 1    | 0.183941153   |
| 0.733369916     | 0.515265182             | 0.419440943 | 0.404436091 | 1    | 0.200539636   |
| 0.758176558     | 0.455136367             | 0.323290619 | 0.276645735 | 1    | 0.210674955   |
| 0.761324749     | 0.494083428             | 0.430236216 | 0.356456462 | 1    | 0.18262865    |
| 0.796308932     | 0.491216893             | 0.456292483 | 0.354311542 | 1    | 0.218361194   |
| 0.653217065     | 0.53208233              | 0.384912597 | 0.420700228 | 1    | 0.235766817   |
| 0.882470696     | 0.482562011             | 0.326628837 | 0.291128954 | 1    | 0.213571641   |
| 0.740903455     | 0.476225868             | 0.417863972 | 0.286617683 | 1    | 0.214694972   |
| 0.672968501     | 0.512813007             | 0.424896903 | 0.416807961 | 1    | 0.237180037   |
| 0.743220263     | 0.488965797             | 0.34608629  | 0.344900017 | 1    | 0.274121144   |
| 0.903808317     | 0.47574372              | 0.360595078 | 0.353552394 | 1    | 0.253527606   |
| 0.884726481     | 0.473083108             | 0.265202509 | 0.390684639 | 1    | 0.241179809   |
| 0.574419982     | 0.518044206             | 0.47101572  | 0.531061841 | 1    | 0.115576619   |
| 0.720092445     | 0.534695661             | 0.456468791 | 0.505293334 | 1    | 0.194101903   |
| 0.767521906     | 0.495835018             | 0.383554985 | 0.327735237 | 1    | 0.226800841   |
| 0.849573512     | 0.472414417             | 0.365420003 | 0.365502037 | 1    | 0.259040593   |
| 0.731500973     | 0.491971205             | 0.433374285 | 0.410139569 | 1    | 0.158183843   |
| 0.785635637     | 0.460896634             | 0.36320124  | 0.349471848 | 1    | 0.229274847   |
| 0.945922698     | 0.511287627             | 0.220859544 | 0.370936448 | 1    | 0.246420126   |
| 0.738907725     | 0.555967694             | 0.461621046 | 0.427611722 | 1    | 0.231869904   |
| 0.740047099     | 0.511111107             | 0.377540424 | 0.355276248 | 1    | 0.322620942   |
| 0.664908171     | 0.50577537              | 0.41075981  | 0.373792261 | 1    | 0.258559814   |

| Monocyte    | Natural killer cell | Natural killer T cell | Neutrophil  | Plasmacytoid dendritic c | Regulatory T cell |
|-------------|---------------------|-----------------------|-------------|--------------------------|-------------------|
| 0.79949643  | 0.272872431         | 0.256640892           | 0.371804394 | 0.673793208              | 0.438712301       |
| 0.803355116 | 0.240934778         | 0.225682071           | 0.384905826 | 0.660125207              | 0.455765857       |
| 0.818367921 | 0.278938989         | 0.256137763           | 0.509177739 | 0.673362428              | 0.495720949       |
| 0.813627141 | 0.253665134         | 0.209837299           | 0.453816863 | 0.659472978              | 0.464045833       |
| 0.822858983 | 0.240934417         | 0.249426594           | 0.389211399 | 0.698922096              | 0.458960873       |
| 0.821111889 | 0.236192689         | 0.214342143           | 0.436651474 | 0.667461353              | 0.468650557       |
| 0.793038646 | 0.217264999         | 0.196042357           | 0.334623926 | 0.682691827              | 0.413941765       |
| 0.808446542 | 0.228478732         | 0.212453038           | 0.556172993 | 0.678927276              | 0.499225952       |
| 0.799912947 | 0.24807462          | 0.215390218           | 0.507854481 | 0.681837776              | 0.498846047       |
| 0.816111652 | 0.248675424         | 0.218623176           | 0.623385211 | 0.739802906              | 0.390437765       |
| 0.758648786 | 0.213128747         | 0.148300695           | 0.603408451 | 0.712544771              | 0.428302861       |
| 0.784334398 | 0.271035099         | 0.237437329           | 0.640299294 | 0.679031236              | 0.516773371       |
| 0.820502805 | 0.279418006         | 0.218398079           | 0.593723062 | 0.695929591              | 0.465414995       |
| 0.760250246 | 0.226022234         | 0.180641628           | 0.505135875 | 0.687139159              | 0.467833537       |
| 0.777265469 | 0.194441876         | 0.146908731           | 0.431633195 | 0.65558379               | 0.448449158       |
| 0.751996793 | 0.208199472         | 0.16652064            | 0.583318144 | 0.683903596              | 0.421027311       |
| 0.785914684 | 0.267268885         | 0.259089132           | 0.716110951 | 0.692191262              | 0.460043142       |
| 0.832520099 | 0.272870401         | 0.195412056           | 0.627590466 | 0.702471725              | 0.448688094       |
| 0.815990688 | 0.24385104          | 0.229373367           | 0.40320656  | 0.713378602              | 0.511180376       |
| 0.757930674 | 0.21713973          | 0.202971517           | 0.508161604 | 0.668046293              | 0.475799083       |
| 0.810116777 | 0.214945961         | 0.183697943           | 0.531178726 | 0.700138164              | 0.472466616       |
| 0.785395589 | 0.20819692          | 0.172498484           | 0.559065774 | 0.67764415               | 0.456373875       |
| 0.723570509 | 0.202358206         | 0.193516971           | 0.604430134 | 0.660858441              | 0.389291541       |
| 0.839475974 | 0.290290161         | 0.253063114           | 0.637744856 | 0.727094599              | 0.499575524       |
| 0.798274211 | 0.243962935         | 0.191940382           | 0.376580664 | 0.682503479              | 0.446884873       |
| 0.806889217 | 0.275820037         | 0.269357664           | 0.476693864 | 0.695560045              | 0.462115084       |

| T follicular helper cell | Type 1 T helper cell | Type 17 T helper cell | Type 2 T helper cell |
|--------------------------|----------------------|-----------------------|----------------------|
| 0.36342307               | 0.316194683          | 0                     | 0.070963613          |
| 0.340084586              | 0.311002223          | 0                     | 0.042931327          |
| 0.333292835              | 0.33610959           | 0                     | 0.083594279          |
| 0.329804635              | 0.312502047          | 0                     | 0.058218916          |
| 0.369015942              | 0.293679696          | 0.034769228           | 0                    |
| 0.344052102              | 0.313235885          | 0                     | 0.000517803          |
| 0.302616145              | 0.302203837          | 0                     | 0.055792509          |
| 0.347604219              | 0.296935967          | 0                     | 0.002632915          |
| 0.345225692              | 0.311273992          | 0                     | 0.028172961          |
| 0.326814003              | 0.298397007          | 0                     | 0.00937265           |
| 0.281563175              | 0.303072735          | 0                     | 0.022862578          |
| 0.327175365              | 0.303810829          | 0                     | 0.076662277          |
| 0.329298691              | 0.298021765          | 0                     | 0.076738977          |
| 0.328965724              | 0.321326485          | 0                     | 0.096748226          |
| 0.285276906              | 0.270016181          | 0                     | 0.018164498          |
| 0.279274102              | 0.269344308          | 0                     | 0.017439681          |
| 0.308040086              | 0.263720334          | 0                     | 0.017234794          |
| 0.310465361              | 0.298383589          | 0.016667184           | 0                    |
| 0.334469678              | 0.308364373          | 0                     | 0.044675047          |
| 0.343672551              | 0.289577908          | 0                     | 0.048340982          |
| 0.288156564              | 0.277500128          | 0                     | 0.008463298          |
| 0.303503698              | 0.264990473          | 0                     | 0.021979336          |
| 0.269597296              | 0.274618403          | 0                     | 0.022725868          |
| 0.345737682              | 0.313966368          | 0                     | 0.078323179          |
| 0.305931812              | 0.31876593           | 0                     | 0.08585377           |
| 0.362139818              | 0.331478414          | 0                     | 0.098028589          |

#### Additional file 4: Table 4: Correlation between METTL1 and immune cells

| Gene   | Immune cell                    | correlation  | pvalue      |
|--------|--------------------------------|--------------|-------------|
| METTL1 | Activated B cell               | 0.620707931  | 0.00349621  |
| METTL1 | Activated CD4 T cell           | 0.56571245   | 0.009328622 |
| METTL1 | Activated CD8 T cell           | 0.675918036  | 0.001070351 |
| METTL1 | Activated dendritic cell       | -0.379218963 | 0.099150788 |
| METTL1 | CD56bright natural killer cell | -0.156865552 | 0.508957853 |
| METTL1 | CD56dim natural killer cell    | -0.084503688 | 0.723179281 |
| METTL1 | Central memory CD4 T cell      | 0.699122163  | 0.000603601 |
| METTL1 | Central memory CD8 T cell      | -0.278769766 | 0.233968707 |
| METTL1 | Effector memory CD4 T cel      | -0.184349282 | 0.436536962 |
| METTL1 | Effector memory CD8 T cel      | 0.235901533  | 0.316692265 |
| METTL1 | Eosinophil                     | 0.063560963  | 0.79007038  |
| METTL1 | Gamma delta T cell             | -0.615944027 | 0.003833234 |
| METTL1 | Immature B cell                | 0.629916054  | 0.00291425  |
| METTL1 | Immature dendritic cell        | -0.015103765 | 0.949607187 |
| METTL1 | Macrophage                     | -0.681244587 | 0.000942628 |
| METTL1 | Mast cell                      | -0.229522461 | 0.330333787 |
| METTL1 | Memory B cell                  | 0.580151812  | 0.007327493 |
| METTL1 | Monocyte                       | -0.584840368 | 0.006759069 |
| METTL1 | Natural killer cell            | -0.390584771 | 0.088628307 |
| METTL1 | Natural killer T cell          | -0.352059432 | 0.127933659 |
| METTL1 | Neutrophil                     | -0.15854185  | 0.504382793 |
| METTL1 | Plasmacytoid dendritic cell    | -0.442239394 | 0.050886141 |
| METTL1 | Regulatory T cell              | -0.517048798 | 0.019568208 |
| METTL1 | T follicular helper cell       | -0.486931104 | 0.02945175  |
| METTL1 | Type 1 T helper cell           | -0.100402773 | 0.673630873 |
| METTL1 | Type 17 T helper cell          | -0.200840371 | 0.395851918 |
| METTL1 | Type 2 T helper cell           | 0.087934071  | 0.712390726 |

## Additional file 5: Table 5: ImmuneDEGs in dataset

### DEGs:

IFI44L FFAR2 RP11-1149M10.1 NRIR RSAD2 RP11-925D8.3 ZDHHC4P1 USP18 IFIT3 CTD-3247F14.2 GBP1P1 CTA-384D8.31  
RP11-16C1.2 HMGB1P3 SNORA51 CMPK2 ISG15 MTOR-AS1 IFI6 CTD-2373N4.5 IFIT1 LINC00487 GALNT14 MTND4P14 IFI44  
AC002511.3 LAMP3 RP11-336A10.2 CTD-2047H16.2 MTND1P11 IFI27 AC098831.4 RP11-34P13.9 AC009505.2 RP11-288L9.4  
EPST11 RP11-665C16.1 PCCA-AS1 IGKV3D-15 CHRNB2 RN7SL127P AP001610.5 SERPING1 HERC5 SPATS2L RP11-493P1.2  
SRGAP2-AS1 RP11-421E14.2 CTD-2047H16.4 OTOF MIR645 OASL PROK2 AP001626.1 RP11-925D8.6 MUC5B RP11-280G9.1  
RNU4ATAC12P CCL2 RPL7P49 IFIT2 DLGAP1 AC093627.12 RP11-925D8.5 IGL2 EGR3 DNM1P34 LGALS3BP RP11-477G18.2  
RP11-69H7.2 FCF1P1 TMEM178B AC002543.2 RN7SL798P OR52P1P ADORA2A-AS1 RP11-405F3.4 FAM225A IGLV3-19 TNFAIP6  
RN7SL558P RP11-616K22.2 RP11-96C23.9 RP11-52J3.2 MAP6 OR56B2P CAV1 RP11-561O23.8 C17orf77 Z85986.1 RP11-324E6.6  
SIGLEC1 RP11-196G18.3 RN7SKP243 CHGA RP11-16E23.3 IFITM3 RP1-228H13.2 OAS3 MARK2P8 RP11-91P24.1 ALAS2 CSRP2  
MRPL53P1 SNORA31 MX1 RP11-670E13.3 CNN2P1 RP11-737O24.3 AC009542.2 CSNK1G2P1 ALG1L RP11-39K24.4 RP11-  
627K11.3 ANXA3 AP001469.5 AMZ2P2 CXCL13 CACNA1E CTD-2313J17.1 AGRN IGKV2D-30 KREMEN1 IGLV1-70 TET2-AS1 LPAR3  
ANKRD44-IT1 EIF2AK2 MGAM2 RP11-701P16.2 LRRC4B RP4-676J13.2 IGKV3-15 RP4-641G12.3 FFAR3 RP11-16C1.1 CBS  
RN7SL502P RP11-557C18.3 MIR3909 MIR4441 RP11-517O13.1 SLC1A2 CTC-505O3.3 CTC-450M9.1 MIR644A RNU7-40P IGKV1D-  
39 RNU6-638P RP11-1086F11.1 FCGR3B IL13 RSPO4 RP11-44N11.1 ZNF90P1 MKRNP2 PXT1 RP3-509L4.3 IGLV1-40 SLC12A8  
AC008937.2 CENPUP2 HMG2P28 MIR221 SNORA70G RP11-460N11.2 IGKV3D-20 CSF2RBP1 GMPR ADRB1 B3GNT5 RP3-  
415N12.1 HNRNPA1P34 E2F7 RP11-90D4.3 HMGB1P14 IGLV2-14 GAPDHP42 KREMEN2 RP11-326L17.1 RP11-723D22.2  
RPS20P15 MESP1 APOBEC3A RP3-403L10.3 LY6E IGHG3 TRPC5 AC019084.7 SPAG6 CXCL11 RN7SKP292 RP11-467L19.8  
ZNF462 RP5-1099D15.1 RP11-848G14.2 AP001628.6 MIR4540 MIR623 GDAP1L1 RP1-71H24.1 BCL2L14 H2AFZP1 ADAMTS7P3  
DDX60 HERC6 MIR23A RNU6-611P RP11-318K15.2 CTD-3105H18.8 RN7SKP16 FAM155B ESRP2 RP11-638I2.9 RP11-273G15.2  
CEACAM1 UCHL1 RNU6V IFIT1B AC010149.4 HBA1 RP11-409K20.6 RP11-552C15.1 AL109761.5 IGLV6-57 RN7SL444P RP11-  
252K23.2 AC002400.1 MTND5P14 CTD-3037G24.3 PKN2-AS1 RP11-553K8.5 MIR5695 RNA5SP151 RP11-95O2.1 GDF15 ABCA1  
HBQ1 RP11-101O6.2 IFIT5 KCNN3 AC159540.14 RLB1 RP11-17G12.2 OR2W3 RP11-5P18.1 PLN CA1 RP11-476D10.1 OLR1  
RP11-39K24.12 CXCL1 HNRNPA3P15 IGKV5-2 EMP1 CARS-AS1 HESX1 TWIST1 MYBL2 RPL23AP81 RP11-153M7.5 RP11-  
214O1.3 E2F8 RPL13AP6 RN7SKP163 EHD4-AS1 TRAJ34 HBA2 GYPA snoU13 MIR5685 RNU6-118P IGLV3-21 PGLYRP1  
AP000350.6 AC096558.1 RP11-39K24.13 LYG2 AC093732.1 FOXI1 AC083884.8 TNFRSF12A AP000662.9 SLC4A1 SPATA21 SYN2  
RPS20P31 CTD-3105H18.11 RP11-345J4.6 CTC-265F19.1 LINC00593 AC110781.3 BATF2 CTD-2542L18.1 KLHDC7B RRM2 CD83  
TMOD1 UBE2CP1 RYK1 HBM MOXD1 CA4 FOSL1 TCF3P1 RNF182 RP11-114M5.1 MIR199A1 TKTL2 ETV7 BACH1-IT2 ASPM  
SCARNA3 SLCO5A1 AC004893.10 RP11-468E2.4 IGLV4-60 SNORD71 LCN2 TMEM14E RP11-363N22.2 HES4 BHLHA15 RP11-  
182I10.2 MIR1285-1 RP11-152L20.3 CTD-2024I7.13 ANGPTL1 RTSEL1P1 RP5-850O15.3 RP11-667K14.5 HELZ2 RP11-172E10.1  
LMOD2 IGKV1-5 MIR1250 IGLV8-61 PARP14 NLRP9P RP11-439A17.9 CTD-2288F12.1 ANLN RP11-665G4.1 TXNDC5 RP11-96D1.9  
RNU6-920P CFAP58-AS1 ERVFRD-1 TSPAN1 FAM20A RP11-296A18.5 MT2A RGS20 MAFB RP11-213H15.1 KCNJ15 GRIP2 PGAP1  
RAP1GAP RN7SL431P MME SNORA72 IGHD4-4 DENND6A-AS1 RP11-535C21.3 ATP5G2P3 HJURP RPS12P27 GBP6 SPDYE2B  
AC124914.3 DOCK4 FAM183B OR2L2 SMG1P1 RNU6-1024P IGHV3-33 LKAAEAR1 RP11-211N11.5 RP11-254B13.4 CKAP2L  
TRAJ29 RP11-153M7.1 RNU6-481P NFE4 MIR553 RNU2-6P RP11-128B16.3 RNA5SP395 PARP9 CNTD2 OAS2 PKMYT1 RP11-  
173A16.1 LINC00534 TRAJ16 TCTEX1D4 FN1 CD300LD S100A3 SMTNL1 TAS1R1 CFAP58 DLGAP5 RP11-874J12.4 MIR133A1HG  
RP4-803J11.2 KIF20A CTB-102L5.7 CHRNG AC127904.2 ARG1 RP11-1094M14.7 SKA1 BTNL8 RN7SKP287 CDC42-IT1 RP1-  
68D18.2 IGHV1-24 RP11-420A6.2 MX2 RP5-867C24.1 MKI67 IGLV3-25 BRCA2 RP11-39K24.14 RP13-638C3.2 REC8 CFLAR-AS1  
AC015987.1 PPP1R26P1 RP11-271C24.3 SPATA3-AS1 PDCD1LG2 RP11-209D14.4 BTBD19 RN7SL34P RP11-354M20.3  
SNORA76A SHC2 RMI2 CENPAAC106900.6 ADORA2A CDT1 AC073130.3 CEP55 DPF1 SPTSSB CYR1 LINC00638 ZNF600 RP3-  
467K16.4 FAM166A TIFAB CTB-39G8.3 RPL4P4 FSIP1 UNC45B RP11-73G16.2 TMC2 EEF1A1P6 KCNK10 CDHR1 FAT4 FAM221B  
CELA1 RP11-203M5.6 TRBJ2-5 CXXC4 KRT81 RP11-629G13.1 C10orf82 CD207 SLC12A3 RP11-495K9.7 TRDV2 NPM1P27 LILRA4

AC008984.6 LIM2 RPL7AP6 SLC4A3 AC074183.4 SLC16A2 CLEC4C SMOC1 SLC34A1 COL13A1 RP5-117110.5 PRICKLE2  
SHISA3 EEF1A1P9 AC007228.9 SORBS2 FEZ1 RP4-622L5.7 RGS17 KCNA5 RPS2P7 SIGLEC17P LDB2 DNASE1L3 CHL1 HTR3A  
AC007405.4 CTD-2616J11.2 SAXO2

**Immune-related genes:**

AZGP1 B2M CALR CANX CD1A CD1B CD1C CD1D CD1E CD4 CD8A CD8B CD74 CREB1 CTSE CTSL1 CTSS FCER1G  
FCGRT PDIA3 HFE HLA-A HLA-B HLA-C HLA-DMA HLA-DMB HLA-DOA HLA-DOB HLA-DPA1 HLA-DPB1 HLA-DQA1 HLA-DQA2  
HLA-DQB1 HLA-DRA HLA-DRB1 HLA-DRB3 HLA-DRB4 HLA-DRB5 HLA-E HLA-F HLA-G HLA-H MR1 HSPA1A HSPA1B HSPA1L  
HSPA2 HSPA4 HSPA5 HSPA6 HSPA8 HSP90AA1 HSP90AB1 ICAM1 IFNA1 IFNA2 IFNA4 IFNA5 IFNA6 IFNA7 IFNA8 IFNA10 IFNA13  
IFNA14 IFNA16 IFNA17 IFNA21 IFNG KIR2DL1 KIR2DL2 KIR2DL3 KIR2DL4 KIR2DS1 KIR2DS3 KIR2DS4 KIR2DS5 KIR3DL1  
KIR3DL2 KLRC1 KLRC2 KLRC3 KLRD1 LTA CIITA MICA MICB NFYA NFYB NFYC LGMN PSMB8 PSMC1 PSMC2 PSMC3 PSMC4  
PSMC5 PSMC6 PSMD1 PSMD2 PSMD3 PSMD4 PSMD5 PSMD7 PSMD8 PSMD10 PSMD11 PSMD13 PSME1 PSME2 PSME3  
PSME4 RELB RFX5 RFXAP SLC10A2 TAP1 TAP2 TAPBP THBS1 SHFM1 KLRC4 AP3B1 RFXANK PSMD6 PSME3 PSMD14  
CLEC4M IFI30 PROCR ADRM1 KIAA0368 TRPC4AP CD209 UBXN1 ERAP1 TAPBP KIR2DL5A ERAP2 ULBP3 ULBP2 ULBP1  
KIR3DL3 RAET1E RAET1L UBR1 RAET1G PDIA2 HAMP PI3 CAMP DEFB4 PPBP REG3G CXCL14 CXCL16 SLPI IL8 CXCL10  
CXCL9 CXCL5 CXCL11 CXCL6 CXCL1 CXCL12 CXCL13 CXCL2 PF4 XCL1 CXCL3 DEFB103A CCL13 CCL1 DEFB1 CCL8 ELANE  
DEFB103B DEFA3 DEFA1 TMSB10 DEFA6 DEFA5 DEFA4 LCN2 LCN1 COLEC10 BPI S100A9 S100A8 DCD LCN6 S100A12 HTN3  
LCN8 LOC728358 CCR10 CELA1 DEFB106A PENK BPIL2 MMP12 BPIL3 LEAP2 SFTPD LCN9 BPIL1 PTGDS TMSB4X PGLYRP1  
ZC3HAV1 TMSB15A S100B S100A13 S100A6 DEFB119 DEFB107A DEFB105A SERPIND1 DEFB129 DEFB127 S100P S100A7  
DEFB104A DEFB126 DEFB106B DEFB104B DEFB107B PGLYRP3 PGLYRP2 S100A10 S100A2 DEFB125 DEFB123 DEFB105B  
DEFB132 C20orf185 LCN12 PGLYRP4 S100A11 S100A5 S100A3 S100A1 DEFB128 DEFB108B HTN1 LMBR1L S100A7A DEFB118  
COLEC12 TMSB4Y DEFB131 DEFB134 DEFB130 DEFB124 DEFB121 DEFB116 DEFB115 DEFB114 DEFB113 DEFB112 DEFB110  
TMSB15B DEFB133 S100Z MAVS TMSL3 S100A14 LCN10 S100A16 DEFB137 DEFB136 DEFB117 DEFB111 ZC3HAV1L S100A7L2  
LOC731414 LOC730963 COLEC2 DEFB4P C20orf186 IFNAR1 AZU1 LOC729523 LOC100130154 LOC100134379 LOC100134289  
LOC100129216 DEFA1A3 LOC100131433 LCN1L1 S100G LOC648637 LOC100130969 LOC100133267 LOC100133128  
LOC100128174 TCHHL1 TINAGL1 IFNGR1 SLC22A17 WFIKKN1 WFDC2 IL6 UMODL1 TGFB1 PF4V1 MMP9 KAL1 TLR4 IFNG  
SPAG11B A2M CTSL1 NFKB1 APOBEC3G FABP6 NOD2 MBL2 SFTPA1B RBP1 TLR2 SLC40A1 PLAU IL1B PAEP HFE2 MUC5AC  
CTSS OBP2A PLTP MX1 DDX58 IL29 IRF3 SFTPA2 SFTPA2B LPA LBP RBP4 SFTPA1 NOX4 LTF IFNB1 RBP5 FABP7 FABP5 FABP3  
FABP2 FABP4 R3HDM1 C20orf71 C20orf114 OASL CRABP2 CRABP1 RBP7 DUOX1 OBP2B RBP2 LCN15 CETP FABP12 FABP9  
PLUNC LCNL1 C8G SPAG11A PI15 NOX1 PMP2 APOD ORM2 ORM1 TNF CTSG PRTN3 MAPK1 PML AEN CYBB C20orf70 ISG20  
BCL3 ISG20L2 NOX5 NOX3 DUOX2 TLR3 TFRC IFIH1 LRP1 TRIM5 IDO1 GDF15 NEDD4 ADIPOQ STAT3 STAT1 IL28A SOCS3  
SEMG1 TNFSF10 CCL20 SOCS1 RNASEL IRF1 IL15 APOBEC3F RARRES3 CHIT1 IFNA1 CD40 TLR7 PPIA HFE ZYX NLRX1 PGC  
VEGFA IKBKE ISG15 DHX58 TNFAIP3 TFR2 FCN2 MUC4 F2R ELN IL27 MAPT LYZ CCL5 LEP CYLD KLKB1 CST4 CSRP1 MAPK14  
JUN ITGAV IRF5 CCR6 IL12B TLR8 GNLY CD81 EIF2AK2 APOM CACYBP NOD1 MAPK8 MAPK3 BST2 BPHL PLA2G2A GRN  
NEWENTRY PDGFRA GNAI1 WNT5A FURIN ADAR TYK2 NOS2 TRAF3 TPT1 TPM2 NEO1 AHNAK TLR1 TK2 PRDX2 MX2 FGF2  
FGA TCF7L2 F2RL1 DAK MSR1 NFKBIZ LMBR1 SPINLW1 SRC MPO ELAVL1 ROBO3 SP1 SOD1 PDF DLL4 ECD SLC11A1 DMBT1  
TMEM173 SKIV2L SEMG2 LTA DES DCK DAXX TNFRSF10A TNFRSF10B EED CCL4 LIMS1 LALBA APOBEC3H TMPRSS6 SPINK5  
MARCO BECN1 TNFSF11 KNG1 CSK KLRK1 KCNH2 JUND JAK1 CREB1 CLDN4 CCL28 RNASE3 RN7SL1 IRF7 IREB2 ILK IL18  
IL17A LTB4R APOBEC3A MASP2 TRIM27 RELA IL7R IL1A PTX3 IFNAR2 IFN1@ SYTL1 APOBEC3C DDX17 PTGS2 HTR1A SEPT-  
7 CD40LG CD14 CD8A CD4 MASP1 PROC MAP2K2 MAP2K1 HRG NDRG1 IRF9 TRIM22 LANCL1 PPP4C HMOX1 HMGB1 HLA-B  
RNASE7 ABCC4 HGF HDAC1 IL28RA PLSCR1 B2M BACH2 TANK PIK3CG ARRB1 RSAD2 STAB2 TBK1 PDYN PDGFRB PDCD1  
PCSK2 PCSK1 ARG2 AQP9 FASLG APOH BIRC5 ANXA6 IL22 VTN VIM VCAM1 PRDX1 GFAP GBP2 ALB SLC29A3 OAS1 AGER  
UNC93B1 TNFSF4 NOS1 ACTG1 ACTA1 ACO1 SERPINA3 IL8RA CCL15 CCL14 CCL4 CCL16 CCL19 CCL13 CCL18 CCL17 CCL26  
CCL22 CCR3 CCL28 CCL4L2 CCBP2 CCR7 CCL27 CCR8 CCRL1 CCR10 CCL2 CCL21 CCL7 CCL5 CCL3 CCL20 CCL11 CCR5



CCL23 CCL25 CCL1 CCL3L3 CCL4L1 CXCL12 XCL1 CCL8 CCL3L1 CCR1 CCL24 XCL2 CXCL1 CXCL10 CXCR4 CXCL2 CXCR6  
CCR4 CXCL11 FAM19A5 FAM19A3 FAM19A4 FAM19A1 FAM19A2 CCL14-CCL15 IL6 TNF IL1B IL18 PTK2B VEGFA IL4 CDH1 CD40  
DEFB103A F2RL1 MMP9 LTBP1 DEFB4 TNFSF10 IL13 IL10 IL2 PPARG FGR MIF CRP JAK2 IL1A PTK2 PTGDR CD86 HCK ARRB1  
GNAI1 VDR OLR1 ADRBK1 TXK RNASE2 CD79A CD79B LYN SYK BTK BLNK VAV3 VAV1 VAV2 RAC1 RAC2 RAC3 PPP3CA  
PPP3CB PPP3CC CHP PPP3R1 PPP3R2 CHP2 NFAT5 NFATC1 NFATC2 NFATC3 NFATC4 HRAS KRAS NRAS FOS JUN CARD11  
BCL10 MALT1 CHUK IKKBK IKKBG NFKB1 RELB NFKBIA NFKBIB NFKBIE CD81 CD19 CR2 PIK3R5 PIK3R1 PIK3R2 PIK3R3  
PIK3CA PIK3CB PIK3CD PIK3CG AKT3 AKT1 AKT2 GSK3B INPP5D CD22 CD72 PTPN6 LILRB3 FCGR2B RASGRP3 PLCG2 PRKCB  
IFITM1 IGH@ IGHA1 IGHA2 IGHD IGHD@ IGHD1-1 IGHD1-14 IGHD1-20 IGHD1-26 IGHD1-7 IGHD2-15 IGHD2-2 IGHD2-21 IGHD2-  
8 IGHD3-10 IGHD3-16 IGHD3-22 IGHD3-3 IGHD3-9 IGHD4-11 IGHD4-17 IGHD4-23 IGHD4-4 IGHD5-12 IGHD5-18 IGHD5-24 IGHD5-  
5 IGHD6-13 IGHD6-19 IGHD6-25 IGHD6-6 IGHD7-27 IGHE IGHG1 IGHG2 IGHG3 IGHG4 IGHJ@ IGHJ1 IGHJ2 IGHJ3 IGHJ4 IGHJ5  
IGHJ6 IGHM IGHV@ IGHV1-18 IGHV1-2 IGHV1-24 IGHV1-3 IGHV1-45 IGHV1-46 IGHV1-58 IGHV1-69 IGHV1-8 IGHV1-C IGHV1-F  
IGHV2-26 IGHV2-5 IGHV2-70 IGHV3-11 IGHV3-13 IGHV3-15 IGHV3-16 IGHV3-20 IGHV3-21 IGHV3-23 IGHV3-30 IGHV3-30-3  
IGHV3-30-5 IGHV3-33 IGHV3-35 IGHV3-38 IGHV3-43 IGHV3-48 IGHV3-49 IGHV3-53 IGHV3-64 IGHV3-66 IGHV3-7 IGHV3-72  
IGHV3-73 IGHV3-74 IGHV3-9 IGHV3-D IGHV3-H IGHV4-28 IGHV4-30-1 IGHV4-30-2 IGHV4-30-4 IGHV4-31 IGHV4-34 IGHV4-39  
IGHV4-4 IGHV4-59 IGHV4-61 IGHV4-B IGHV5-51 IGHV5-A IGHV6-1 IGHV7-4-1 IGHV7-81 IGK@ IGKC IGKDEL IGKJ@ IGKJ1 IGKJ2  
IGKJ3 IGKJ4 IGKJ5 IGKV@ IGKV1-12 IGKV1-13 IGKV1-16 IGKV1-17 IGKV1-27 IGKV1-33 IGKV1-37 IGKV1-39 IGKV1-5 IGKV1-6  
IGKV1-8 IGKV1-9 IGKV1D-12 IGKV1D-13 IGKV1D-16 IGKV1D-17 IGKV1D-33 IGKV1D-37 IGKV1D-39 IGKV1D-42 IGKV1D-43  
IGKV1D-8 IGKV2-24 IGKV2-28 IGKV2-30 IGKV2-40 IGKV2D-24 IGKV2D-28 IGKV2D-29 IGKV2D-30 IGKV2D-40 IGKV3-11 IGKV3-15  
IGKV3-20 IGKV3-7 IGKV3D-11 IGKV3D-15 IGKV3D-20 IGKV3D-7 IGKV4-1 IGKV5-2 IGKV6-21 IGKV6D-21 IGKV6D-41 IGL@ IGLC@  
IGLC1 IGLC2 IGLC3 IGLC6 IGLC7 IGLJ@ IGLJ1 IGLJ2 IGLJ3 IGLJ4 IGLJ5 IGLJ6 IGLJ7 IGLV@ IGLV1-36 IGLV1-40 IGLV1-44 IGLV1-  
47 IGLV1-50 IGLV1-51 IGLV10-54 IGLV11-55 IGLV2-11 IGLV2-14 IGLV2-18 IGLV2-23 IGLV2-33 IGLV2-8 IGLV3-1 IGLV3-10 IGLV3-12  
IGLV3-16 IGLV3-19 IGLV3-21 IGLV3-22 IGLV3-25 IGLV3-27 IGLV3-32 IGLV3-9 IGLV4-3 IGLV4-60 IGLV4-69 IGLV5-37 IGLV5-39  
IGLV5-45 IGLV5-48 IGLV5-52 IGLV6-57 IGLV7-43 IGLV7-46 IGLV8-61 IGLV9-49 C3 C5 CAMP CCL1 CCL11 CCL13 CCL14 CCL14-  
CCL15 CCL15 CCL16 CCL17 CCL18 CCL19 CCL2 CCL20 CCL21 CCL22 CCL23 CCL24 CCL25 CCL26 CCL27 CCL28 CCL3 CCL3L1  
CCL3L2 CCL3L3 CCL4 CCL4L1 CCL4L2 CCL5 CCL7 CCL8 CKLF CMA1 CTSG CX3CL1 CXCL1 CXCL10 CXCL11 CXCL12 CXCL13  
CXCL14 CXCL16 CXCL17 CXCL2 CXCL3 CXCL5 CXCL6 CXCL9 CYR61 DEFA1 DEFA3 DEFA5 DEFB1 DEFB103A DEFB104A  
DEFB4 EDN1 EDN2 EDN3 FGF10 FGF2 HTN3 IL8 LECT2 PF4 PF4V1 PLAUR PPBP PPBPL1 PROK2 RNASE2 SAA1 SAA2 SBDS  
SEMA3A SEMA3B SEMA3C SEMA3D SEMA3E SEMA3F SEMA3G SEMA4A SEMA4B SEMA4C SEMA4D SEMA4F SEMA4G  
SEMA5A SEMA5B SEMA6A SEMA6B SEMA6C SEMA6D SEMA7A SLIT1 SLIT2 TNC TYMP XCL1 XCL2 C5AR1 CCBP2 CCR1  
CCR10 CCR3 CCR4 CCR5 CCR6 CCR7 CCR8 CCR9 CCRL1 CCRL2 CMKLR1 CX3CR1 CXCR3 CXCR4 CXCR5 CXCR6 CXCR7  
CYSLTR1 CYSLTR2 DARC EDNRA EDNRB FPR1 FPR2 FPR3 GPR17 GPR32 GPR33 GPR44 GPR77 IL8RA IL8RB LTB4R LTB4R2  
PLAUR PLXNA1 PLXNA2 PLXNA3 PLXNA4 PLXNB1 PLXNB2 PLXNB3 PLXNC1 PLXND1 PTAFR ROBO1 ROBO2 ROBO3 RXFP3  
XCR1 ADIPOQ ADM ADM2 AGRP AGT AMBN AMELX AMH ANGPTL5 ANGPTL7 APLN AREG ARMET ARMETL1 ARTN AVP AZU1  
BDNF BMP1 BMP10 BMP15 BMP2 BMP3 BMP4 BMP5 BMP6 BMP7 BMP8A BMP8B BTC C19orf10 C3 C5 CALCA CALCB CAMP  
CAT CCK CCL1 CCL11 CCL13 CCL14 CCL14-CCL15 CCL15 CCL16 CCL17 CCL18 CCL19 CCL2 CCL20 CCL21 CCL22 CCL23  
CCL24 CCL25 CCL26 CCL27 CCL28 CCL3 CCL3L1 CCL3L2 CCL3L3 CCL4 CCL4L1 CCL4L2 CCL5 CCL7 CCL8 CD320 CD40LG  
CD70 CECR1 CER1 CGA CGB CGB1 CGB2 CGB5 CGB7 CGB8 CHGA CHGB CKLF CLCF1 CLEC11A CMA1 CMTM1 CMTM2  
CMTM3 CMTM4 CMTM5 CMTM6 CMTM7 CMTM8 CNTF CORT CRH CSF1 CSF2 CSF3 CSH1 CSH2 CSHL1 CSPG5 CTF1 CTGF  
CTSG CX3CL1 CXCL1 CXCL10 CXCL11 CXCL12 CXCL13 CXCL14 CXCL16 CXCL17 CXCL2 CXCL3 CXCL5 CXCL6 CXCL9 CYR61  
DEFA1 DEFA3 DEFA5 DEFB1 DEFB103A DEFB104A DEFB4 DKK1 EBI3 EDN1 EDN2 EDN3 EGF EPGN EPO EREG ESM1 FAM3B  
FAM3C FAM3D FASLG FGF1 FGF10 FGF11 FGF12 FGF13 FGF14 FGF16 FGF17 FGF18 FGF19 FGF2 FGF20 FGF21 FGF22 FGF23  
FGF3 FGF4 FGF5 FGF6 FGF7 FGF8 FGF9 FIGF FIGNL2 FLT3LG FSHB GAL GALP GAST GCG GDF1 GDF10 GDF11 GDF15 GDF2  
GDF3 GDF5 GDF6 GDF7 GDF9 GDNF GH1 GH2 GHRH GHRL GIP GKN1 GMFB GMFG GNRH1 GNRH2 GPHA2 GPHB5 GPI GREM1  
GREM2 GRN GRP GUCA2A HAMP HBEGF HDGF HDGFRP3 HGF HTN3 IAPP IFNA1 IFNA10 IFNA13 IFNA14 IFNA16 IFNA17 IFNA2

IFNA21 IFNA4 IFNA5 IFNA6 IFNA7 IFNA8 IFNB1 IFNE IFNG IFNK IFNW1 IGF1 IGF2 IL10 IL11 IL12A IL12B IL13 IL15 IL16 IL17A  
IL17B IL17C IL17D IL17F IL18 IL19 IL1A IL1B IL1F10 IL1F5 IL1F6 IL1F7 IL1F8 IL1F9 IL1RN IL2 IL20 IL21 IL22 IL23A IL24 IL25 IL26  
IL27 IL28A IL28B IL29 IL3 IL31 IL32 IL33 IL34 IL4 IL5 IL6 IL6ST IL7 IL8 IL9 INHA INHBA INHBB INHBC INHBE INS INS-IGF2 INSL3  
INSL4 INSL5 INSL6 JAG1 JAG2 KGFLP1 KGFLP2 KITLG KL LACRT LECT2 LEFTY1 LEFTY2 LEP LHB LIF LRSAM1 LTA LTB LTBP1  
LTBP2 LTBP3 LTBP4 MDK MIA MIF MLN MSTN NAMPT NDP NENF NGF NMB NODAL NOV NPFF NPPA NPPB NPPC NPY NRG1  
NRG2 NRG3 NRG4 NRTN NTF3 NTF4 NTS NUDT6 OGN OSGIN1 OSM OSTN OXT P11 PDGFA PDGFB PDGFC PDGFD PDGFRA  
PDGFRB PDGFRL PDYN PENK PF4 PF4V1 PGF PLAU PMCH PNOG POMC PPBP PPBPL1 PPBPL2 PPY PRL PRLH PROK1  
PROK2 PSPN PTH PTH2 PTHLH PTN PYY QRFP RABEP1 RABEP2 REG1A RETN RETNLB RLN1 RLN2 RLN3 RNASE2 S100A6  
SAA1 SAA2 SBDS SCG2 SCGB3A1 SCT SCYE1 SECTM1 SEMA3A SEMA3B SEMA3C SEMA3D SEMA3E SEMA3F SEMA3G  
SEMA4A SEMA4B SEMA4C SEMA4D SEMA4F SEMA4G SEMA5A SEMA5B SEMA6A SEMA6B SEMA6C SEMA6D SEMA7A SLIT1  
SLIT2 SLURP1 SPP1 SST STC1 STC2 TAC1 TDGF1 TDGF3 TG TGFA TGFB1 TGFB2 TGFB3 THPO TNC TNF TNFRSF11B TNFSF10  
TNFSF11 TNFSF12 TNFSF13 TNFSF13B TNFSF14 TNFSF15 TNFSF18 TNFSF4 TNFSF8 TNFSF9 TOR2A TRH TSHB TSLP TXLNA  
TYMP UCN UCN2 UCN3 UTS2 UTS2D VEGFA VEGFB VEGFC VGF VIP XCL1 XCL2 ACVR1B ACVR1C ACVR2A ACVR2B ACVRL1  
ADCYAP1R1 ADIPOR1 ADIPOR2 ADRB1 ADRB2 AGTR1 AGTR2 AMHR2 ANGPT1 ANGPT4 ANGPTL1 ANGPTL2 ANGPTL3  
ANGPTL4 ANGPTL6 APLNR AR AVPR1A AVPR1B AVPR2 BMPR1A BMPR1B BMPR2 BRD8 C3AR1 C5AR1 CALCR CALCRL CCBP2  
CCR1 CCR10 CCR3 CCR4 CCR5 CCR6 CCR7 CCR8 CCR9 CCRL1 CCRL2 CD40 CMKLR1 CNTFR CRHR1 CRHR2 CRIM1 CRLF1  
CRLF2 CRLF3 CSF1R CSF2RA CSF2RB CSF3R CX3CR1 CXCR3 CXCR4 CXCR5 CXCR6 CXCR7 CYSLTR1 CYSLTR2 DARC  
EDNRA EDNRB EGFR ENG EPOR ESR1 ESR2 ESRRR ESRRB ESRRG FGFR1 FGFR2 FGFR3 FGFR4 FGFR1 FLT1 FLT3 FLT4  
FPR1 FPR2 FPR3 FSHR GALR2 GALR3 GCGR GHR GHRHR GHSR GIPR GLP1R GLP2R GNRHR GPER GPR17 GPR32 GPR33  
GPR44 GPR77 HNF4A HNF4G HTR3A HTR3B HTR3C HTR3D HTR3E IFNAR1 IFNAR2 IFNGR1 IFNGR2 IGF1R IGF2R IL10RA  
IL10RB IL11RA IL11RB IL12RB1 IL12RB2 IL13RA1 IL13RA2 IL15RA IL15RB IL17RA IL17RB IL17RC IL17RD IL17RE IL18R1 IL18RAP  
IL1R1 IL1R2 IL1RAP IL1RL1 IL1RL2 IL20RA IL20RB IL21R IL22RA1 IL22RA2 IL23R IL27RA IL28RA IL2RA IL2RB IL2RG IL31RA  
IL3RA IL4R IL5RA IL6R IL7R IL8RA IL8RB IL9R INSR KDR LEPR LGR4 LGR5 LGR6 LHCGR LIFR LTB4R LTB4R2 LTBR MC1R MC2R  
MC3R MC4R MCHR1 MCHR2 MET MLNR MPL MTNR1A MTNR1B NGFR NMBR NPR1 NPR3 NR0B1 NR0B2 NR1D1 NR1D2 NR1H2  
NR1H3 NR1H4 NR1I2 NR1I3 NR2C1 NR2C2 NR2E1 NR2E3 NR2F1 NR2F2 NR2F6 NR3C1 NR3C2 NR4A1 NR4A2 NR4A3 NR5A1  
NR5A2 NR6A1 NRP1 NRP2 OGFR OPRD1 OPRK1 OPRL1 OPRM1 OSMR OXTR PGR PGRMC2 PLAUR PLXNA1 PLXNA2 PLXNA3  
PLXNA4 PLXNB1 PLXNB2 PLXNB3 PLXNC1 PLXND1 PPARA PPARB PPARC PRLHR PRLR PTAFR PTGDR PTGDS PTGER1  
PTGER2 PTGER3 PTGER4 PTGFR PTH1R PTH2R RARA RARB RARG ROBO1 ROBO2 ROBO3 RORA RORB RORC RXFP1 RXFP2  
RXFP3 RXRA RXRB RXRG S1PR1 S1PR2 SCTR SDC1 SDC2 SDC3 SDC4 SORT1 SSTR1 SSTR2 SSTR5 ST2 TACR1 TEK TGFB1  
TGFB2 TGFB3 THRA THRB TIE1 TNFRSF10A TNFRSF10B TNFRSF10C TNFRSF10D TNFRSF11A TNFRSF12A TNFRSF13B  
TNFRSF13C TNFRSF14 TNFRSF17 TNFRSF18 TNFRSF19 TNFRSF1A TNFRSF1B TNFRSF21 TNFRSF25 TNFRSF4 TNFRSF6B  
TNFRSF8 TNFRSF9 TRHR TSHR TUBB3 VDR VIPR1 VIPR2 XCR1 IFNA10 IFNA13 IFNA14 IFNA16 IFNA17 IFNA21 IFNA4  
IFNA5 IFNA6 IFNA7 IFNA8 IFNB1 IFNE IFNG IFNK IFNW1 IFNAR2 IFNGR1 IFNGR2 IL11 IL12A IL12B IL13 IL15 IL16 IL17A IL17B  
IL17C IL17D IL17F IL18 IL19 IL1A IL1B IL1F10 IL1F5 IL1F6 IL1F7 IL1F8 IL1F9 IL1RN IL2 IL20 IL21 IL22 IL23A IL24 IL25 IL26 IL27  
IL28A IL28B IL29 IL3 IL31 IL32 IL33 IL34 IL4 IL5 IL6 IL6ST IL7 IL8 IL9 TXLNA IL10RA IL10RB IL11RA IL11RB IL12RB1 IL12RB2  
IL13RA1 IL13RA2 IL15RA IL15RB IL17RA IL17RB IL17RC IL17RD IL17RE IL18R1 IL18RAP IL1R1 IL1R2 IL1RAP IL1RL1 IL1RL2  
IL20RA IL20RB IL21R IL22RA1 IL22RA2 IL23R IL27RA IL28RA IL2RA IL2RB IL2RG IL31RA IL3RA IL4R IL5RA IL6R IL7R IL8RA IL8RB  
IL9R ST2 HLA-A HLA-B HLA-C HLA-E HLA-G KIR3DL1 KIR3DL2 KIR2DL1 KIR2DL2 KIR2DL3 KIR2DL4 KIR2DL5A KLRC1 KLRC2  
KLRC3 KLRD1 PTPN6 PTPN11 ICAM1 ICAM2 ITGAL ITGB2 PTK2B VAV3 VAV1 VAV2 RAC1 RAC2 RAC3 PAK1 MAP2K1 MAP2K2  
MAPK1 MAPK3 TNF CSF2 IFNG KIR2DS1 KIR2DS3 KIR2DS4 KIR2DS5 NCR2 TYROBP LCK FCGR3A FCGR3B LOC652578 NCR1  
NCR3 FCER1G CD247 ZAP70 SYK LCP2 LAT PLCG1 PLCG2 SH3BP2 PIK3CA PIK3CB PIK3CD PIK3CG PIK3R5 PIK3R1 PIK3R2  
PIK3R3 FYN SHC2 SHC4 SHC3 SHC1 GRB2 SOS1 SOS2 HRAS KRAS NRAS ARAF BRAF RAF1 MICA MICB ULBP3 ULBP2 ULBP1  
KLRK1 HCST CD48 CD244 PPP3CA PPP3CB PPP3CC CHP PPP3R1 PPP3R2 CHP2 NFAT5 NFATC1 NFATC2 NFATC3 NFATC4  
PRKCA PRKCB PRKCG SH2D1B SH2D1A IFNGR1 IFNGR2 IFNA1 IFNA2 IFNA4 IFNA5 IFNA6 IFNA7 IFNA8 IFNA10 IFNA13 IFNA14

IFNA16 IFNA17 IFNA21 IFNB1 IFNAR1 IFNAR2 TNFSF10 TNFRSF10D TNFRSF10C TNFRSF10B TNFRSF10A FASLG FAS GZMB  
PRF1 CASP3 BID CD3D CD3E CD3G CD247 CD4 CD8A CD8B PTPRC LCK FYN ZAP70 LCP2 LAT ITK TEC NCK1 NCK2 VAV3 VAV1  
VAV2 GRAP2 GRB2 PAK1 PAK2 PAK3 PAK4 PAK6 PAK7 RHOA CDC42 PPP3CA PPP3CB PPP3CC CHP PPP3R1 PPP3R2 CHP2  
NFAT5 NFATC1 NFATC2 NFATC3 NFATC4 SOS1 SOS2 HRAS KRAS NRAS FOS JUN CARD11 BCL10 MALT1 CHUK IKBKB IKBKG  
NFKB1 RELA NFKBIA NFKBIB NFKBIE CD28 ICOS CD40LG PIK3R5 PIK3R1 PIK3R2 PIK3R3 PIK3CA PIK3CB PIK3CD PIK3CG  
AKT3 AKT1 AKT2 MAP3K8 MAP3K14 PDCD1 CTLA4 PTPN6 CBL CBLB IL2 IL4 IL5 IL10 IFNG CSF2 TNF CDK4 RASGRP1  
PDK1 PLCG1 PRKCQ TRAC TRAJ1 TRAJ2 TRAJ3 TRAJ4 TRAJ5 TRAJ6 TRAJ7 TRAJ8 TRAJ9 TRAJ10 TRAJ11 TRAJ12 TRAJ13  
TRAJ14 TRAJ15 TRAJ16 TRAJ17 TRAJ18 TRAJ19 TRAJ20 TRAJ21 TRAJ22 TRAJ23 TRAJ24 TRAJ25 TRAJ26 TRAJ27 TRAJ28  
TRAJ29 TRAJ30 TRAJ31 TRAJ32 TRAJ33 TRAJ34 TRAJ35 TRAJ36 TRAJ37 TRAJ38 TRAJ39 TRAJ40 TRAJ41 TRAJ42 TRAJ43  
TRAJ44 TRAJ45 TRAJ46 TRAJ47 TRAJ48 TRAJ49 TRAJ50 TRAJ52 TRAJ53 TRAJ54 TRAJ56 TRAJ57 TRAJ58 TRAJ59 TRAJ61  
TRAV1-1 TRAV1-2 TRAV2 TRAV3 TRAV4 TRAV5 TRAV7 TRAV8-1 TRAV8-2 TRAV8-3 TRAV8-4 TRAV8-6 TRAV8-7 TRAV9-1 TRAV9-  
2 TRAV10 TRAV12-1 TRAV12-2 TRAV12-3 TRAV13-1 TRAV13-2 TRAV14DV4 TRAV16 TRAV17 TRAV18 TRAV19 TRAV20 TRAV21  
TRAV22 TRAV23DV6 TRAV24 TRAV25 TRAV26-1 TRAV26-2 TRAV27 TRAV29DV5 TRAV30 TRAV34 TRAV35 TRAV36DV7 TRAV38-  
1 TRAV38-2DV8 TRAV39 TRAV40 TRAV41 TRBC1 TRBC2 TRBD1 TRBD2 TRBJ1-1 TRBJ1-2 TRBJ1-3 TRBJ1-4 TRBJ1-5 TRBJ1-6  
TRBJ2-1 TRBJ2-2 TRBJ2-3 TRBJ2-4 TRBJ2-5 TRBJ2-6 TRBJ2-7 TRBV2 TRBV3-1 TRBV4-1 TRBV4-2 TRBV4-3 TRBV5-1 TRBV5-4  
TRBV5-5 TRBV5-6 TRBV5-7 TRBV5-8 TRBV6-1 TRBV6-2 TRBV6-3 TRBV6-4 TRBV6-5 TRBV6-6 TRBV6-7 TRBV6-8 TRBV6-9  
TRBV7-2 TRBV7-3 TRBV7-4 TRBV7-6 TRBV7-7 TRBV7-8 TRBV7-9 TRBV9 TRBV10-1 TRBV10-2 TRBV10-3 TRBV11-1 TRBV11-2  
TRBV11-3 TRBV12-3 TRBV12-4 TRBV12-5 TRBV13 TRBV14 TRBV15 TRBV16 TRBV17 TRBV18 TRBV19 TRBV20-1 TRBV24-1  
TRBV25-1 TRBV27 TRBV28 TRBV29-1 TRBV30 TRDC TRDD1 TRDD2 TRDD3 TRDJ1 TRDJ2 TRDJ3 TRDJ4 TRDV1 TRDV2 TRDV3  
TRGV9 TRGV8 TRGV5 TRGV4 TRGV3 TRGV2 TRGJP2 TRGJP1 TRGJP TRGJ2 TRGJ1 TRGC2 TRGC1 TRAV6 BMP1 BMP10  
BMP15 BMP2 BMP3 BMP4 BMP5 BMP6 BMP7 BMP8A BMP8B GDF1 GDF10 GDF11 GDF15 GDF2 GDF3 GDF5 GDF6 GDF7 GDF9  
GDNF INHA INHBA INHBB INHBC INHBE LEFTY1 LEFTY2 NODAL TGFB1 TGFB2 TGFB3 ACVR1B ACVR1C ACVR2A ACVR2B  
ACVRL1 AMHR2 BMPR1A BMPR1B BMPR2 TGFB3 TGFB2 TGFB3 TNFRSF11B TNFSF10 TNFSF11 TNFSF12 TNFSF13  
TNFSF13B TNFSF14 TNFSF15 TNFSF18 TNFSF4 TNFSF8 TNFSF9 TNFRSF10B TNFRSF10C TNFRSF10D TNFRSF11A  
TNFRSF12A TNFRSF13B TNFRSF13C TNFRSF14 TNFRSF17 TNFRSF18 TNFRSF19 TNFRSF1A TNFRSF1B TNFRSF21  
TNFRSF25 TNFRSF4 TNFRSF6B TNFRSF8 TNFRSF9 ADAM28 CD180 CD79B BLK CD19 MS4A1 TNFRSF17 IGHM GNG7 MICAL3  
SPIB HLA-DOB IGKC PNOG FCRL2 BACH2 CR2 TCL1A AKNA ARHGAP25 CCL21 CD27 CD38 CLEC17A CLEC9A CLECL1 AIM2  
BIRC3 BRIP1 CCL20 CCL4 CCL5 CCNB1 CCR7 DUSP2 ESCO2 ETS1 EXO1 EXOC6 IARS ITK KIF11 KNTC1 NUF2 PRC1 PSAT1  
RGS1 RTKN2 SAMSN1 SELL TRAT1 ADRM1 AHS1 C1GALT1C1 CCT6B CD37 CD3D CD3E CD3G CD69 CD8A CETN3 CSE1L  
GEMIN6 GNLY GPT2 GZMA GZMH GZMK IL2RB LCK MPZL1 NKG7 PIK3IP1 PTRH2 TIMM13 ZAP70 ABHD3 AHNAK ANXA2P2  
AQP3 ATHL1 BMI1 BZW2 CD63 COL4A1 CYLD ELMO2 FYN GLIPR1 GSS IFITM2 ITGB1 ITGB2 KLF5 LSP1 NDUFB9 PKM2 SFXN3  
SIRPG SMAD4 STX4 TRADD VIM XRCC6 ACTN4 ADAM12 ADCY9 F13A1 FCER1G FCGR3B FGF7 FKBP4 GLUD1 GM2A GUSB  
IL1RN NOL11 NTRK1 RARA RNF128 SIGLEC1 TNFRSF11A TOX4 UBA52 ULBP1 ATM CASP3 CASQ1 CD300E DARS DOCK9  
EXOSC9 EZH2 GDE1 IL34 NCOA4 NEFL PDGFRL PTGS1 REPS1 SCG2 SDPR SIGLEC14 SIGLEC6 TAL1 TFEC TIPIN TPK1  
UQCRB USP9Y WIPF1 ZCRB1 ACAP1 APOL3 ARHGAP10 ATP10D C3AR1 CCR5 CD160 CD55 CFLAR CMKLR1 DAPP1 FCRL6  
FLT3LG GZMM HAPLN3 HLA-DMB HLA-DPA1 HLA-DPB1 IFI16 LIME1 LTK NFKBIA SETD7 SIK1 TRIB2 ACP5 AQP9 BTN3A2 C1orf54  
CARD8 CCL18 CD209 CD33 CD36 CDK5 IL10RB KLRF1 LGALS1 MAPK7 KLHL7 KRT80 LAMC1 LCORL LMNB1 MEIS3P1 MPL  
FABP1 FABP5 FADD MFAP3L MINPP1 RPS24 RPS7 RPS9 DBNL CCL13 CD22 CYBB FAM129C FCRL1 FCRL3 FCRL5 FCRLA  
HDAC9 HLA-DQA1 HVCN1 KIAA0226 NCF1 NCF1B P2RY10 SP100 TXNIP STAP1 TAGAP ZCCHC2 AICDA CCNA2 CDKN3 CLCN5  
ENPP1 FCER1A FCRL4 MYC RUNX2 SORL1 SOX5 STAT5A STAT5B TLR9 CCL3L1 CD72 CLEC5A FOXP3 ITGA4 L1CAM LIPA  
LRP1 LRRC42 MARCO MMP12 MND1 MRC1 MS4A6A PELO PLEK PRSS23 PTGIR ST8SIA4 STAB1 B3GAT1 CDK5R1 PDCD1  
BCL6 CD200 CD83 CD84 FGF2 GPR18 CEBPA CECR1 CLEC10A CLEC4A CSF1R CTSS DMN DPP4 LRRC32 MC5R MICA NCAM1  
NCR2 NRP1 PDCD1LG2 PDCD6 PRDX1 RAE1 RAET1E SIGLEC7 SIGLEC9 TYRO3 CHST12 CLIC3 IVNS1ABP KIR2DL2 LGMN  
CD70 TBX21 ADAM8 AHCYL2 ALCAM B3GALNT1 BBS12 BST1 CD151 CD47 CD48 CD52 CD53 CD59 CD6 CD68 CD7 CD96 CFHR3

CHRM3 CLEC7A COL23A1 COL4A4 COL5A3 DAB1 DLEU7 DOC2B EMP1 F12 FURIN GAB3 GATM GFPT2 GPR25 GREM2 HAVCR1  
HSD11B1 HUNK IGF2 RCSD1 RYR1 SAV1 SELE SELP SH3KBP1 SIT1 SLC35B3 SIGLEC10 SKAP1 THUMP2 TIGIT ZEB2 ENC1  
FAM134B FBXO30 FCGR2C STAC LTC4S MAN1B1 MDH1 MMD RGS16 IL12A P2RX5 CD97 ITGB4 ICAM3 METRNL TNFRSF1A  
IRF1 HTR2B CALD1 MOCOS TRAF3IP2 TLR8 TRAF1 DUSP14 IL17A IL17RA C2CD4A C2CD4B CA2 CCDC65 CEACAM3 IL17C  
IL17F IL17RC IL17RE IL23A ILDR1 LONRF3 SH2D6 TNIP2 ABCA1 ABCB1 ADAMTS12 ANK1 ANKRD22 B3GALT2 CAMTA1 CCR9  
CD40 GPR44 IFT80 ASB2 CSRP2 DAPK1 DLC1 DNAJC12 DUSP6 GNAI1 LAMP3 NRP2 OSBPL1A PDE4B PHLDA1 PLA2G4A  
RAB27B RBMS3 RNF125 TMPRSS3 GATA3 BIRC5 CDC25C CDC7 CENPF CXCR6 DHFR EVI5 GSTA4 HELLS IL26 LAIR2 ABCD1  
C1QC CAPG CCL3L3 CD207 CD302 ATP5B ATP5L ATP6V1A BCL2L1 C1QB SNURF SPCS3 CCNA1 CEACAM8 NOS2 SRA1  
TNFRSF6B TREM1 TREML1 RHOA SLC25A37 TNFSF14 TREML4 VNN2 XPO6 CLEC4C TNFAIP2 UBD ACTR3 RAB1A SLA HLA-  
DQA2 SIGLEC5 SLAMF9 ABAT C1orf75 C5orf15 CDHR1 DCAF12 DYNLL1 GPR137B HCP5 HDGFRP2 KRT86 MLST8 ELMOD3  
ENTPD5 FAM119A FAM179A CLIC2 COX7A2L CREB3L4 CSF1 CSNK2A2 CSTA CSTB CTPS CTSD FST GATA2 GMPR HDC HEY1  
HOXA1 HS2ST1 HS3ST1 BCL11B CDH3 MYL6B NAA16 CIQA CIQB CYP27B1 EIF3M CYP27A1 DDX55 DYRK2 RPL37A NOTCH3  
AKR7A3 GPRC5C GRIN1 HLA-E PORCN PSMC4 UPP1 IL21R KIR2DS1 KIR2DS2 KIR2DS5 GIPR KRT18P50 LRMP FOSB RRP12  
GPR183 NR4A3 ST3GAL6 DEPDC5 PDE6C PKD2L2 GPR65 IL5RA P2RY14 DACH1 DAPK2 EMR3 ACADM AHCYL1 ALDH1A2  
ALDH3A2 ALDH9A1 ALOX15 AMT ARL1 ATIC ATP5A1 CAPZA1 LILRA5 RDX RRAGD TACSTD2 INPP5F RAB38 PLAU CSF3R  
SLC18A2 AMPD2 CLTB C1orf162 AIF1 CCL1 CCL14 CCL23 CCL26 CD300LB CNR1 CNR2 EIF1 EIF4A1 FPR1 FPR2 FRAT2 GPR27  
GPR77 RNASE2 MS4A2 BASP1 IGSF6 HK3 VNN1 FES NPL FZD2 FAM198B HNMT SLC15A3 CD4 TXNDC3 FRMD4A CRYBB1  
HRH1 WNT5B ADAMTS3 CPA3 CMA1 CTSG ARHGAP15 CPM FCN1 FTL HSPA6 ITGA9 RNASE3 S100A4 SIGLEC8 SLC6A4 PTGS2  
EGR3 PILRA CCR2 CD14 CD2 CD86 CXCR4 FCGR2A FCGR2B FCGR3A FERMT3 GPSM3 IL18BP IL4R ITGAL ITGAM PARVG  
PSAP PTGER2 PTGES2 S100A8 S100A9 ASGR2 CFP ASGR1 CD1D UPK3A ACTG1 ANXA5 ATP6V1B2 CFL1 DAZAP2 CTBS  
EMR4P HIVEP2 MARCKSL1 MBP MMP15 PNPLA6 TMBIM6 PQBP1 TEX264 IKZF1 AKT3 AXL BST2 CDH2 CRTAM CSF2RA CTSZ  
CXCL1 CYTH1 DAXX DGKH DLL4 DPYD ERBB3 F11R FAM27A FAM49A FASLG FCGR1A FN1 FSTL1 FUCA1 GBP3 GLS2 GRB2  
LST1 BCL2 CDC5L FGF18 FUT5 FZR1 GAGE2 IGFBP5 KANK2 LDB3 BTN2A2 CD101 CD109 CNPY3 CNPY4 CREB1 CRTC2 CRTC3  
CSF2 KLRC1 FUT4 ICAM2 IL32 LAMP2 LILRB5 KLRG1 HSPA4 HSPB6 ISM2 ITIH2 KDM4C KIR2DS4 KIRREL3 SDCBP NFATC2IP  
MICB KIR2DL1 KIR2DL3 KIR3DL1 KIR3DL2 NCR1 FOSL1 TSLP SLC7A7 SPP1 TREM2 UBASH3A YBX2 CCDC88A CLEC1A THBD  
PDPN VCAM1 EMR1 CREB5 CDA CHST15 S100A12 APOBEC3A CASP5 MMP25 HAL C1orf183 FFAR2 MAK CXCR1 STEAP4  
MGAM BTNL8 CXCR2 TNFRSF10C VNN3 CBX6 DAB2 DDX17 HIGD1A IDH3A IL3RA MAGED1 NUCB2 OFD1 OGT PDIA4 SERTAD2  
SIRPA TMED2 ENG FCAR IGF1 ITGA2B GABARAP GPX1 KRT23 PROK2 RALB RETNLB RNF141 SEC14L1 SEPX1 EMP3 CD300LF  
ABTB1 KLHL21 PHRF1

**ImmuneDEGs:**

FFAR2 RSAD2 ISG15 LAMP3 IGKV3D-15 OASL PROK2 CCL2 EGR3 IGLV3-19 SIGLEC1 CHGA CSRP2 MX1 CXCL13 IGKV2D-30  
EIF2AK2 IGKV3-15 IGKV1D-39 FCGR3B IL13 IGLV1-40 IGKV3D-20 GMPR ADRB1 IGLV2-14 APOBEC3A IGHG3 CXCL11 IGLV6-57  
GDF15 ABCA1 OLR1 CXCL1 IGKV5-2 EMP1 TRAJ34 IGLV3-21 PGLYRP1 TNFRSF12A CD83 FOSL1 IGLV4-60 LCN2 ANGPTL1  
IGKV1-5 IGLV8-61 IGH4-4 IGHV3-33 TRAJ29 TRAJ16 FN1 S100A3 BTNL8 IGHV1-24 MX2 IGLV3-25 PDCD1LG2 SHC2 CDHR1  
CELA1 TRBJ2-5 CD207 TRDV2 CLEC4C HTR3A

**Additional file 6: Table 6:** Correlation of LAMP3, CD83, PDCD1LG2, IGKVD3D-20, IGKV5-2, IGKV2D-30, IGLV3-19

and IGLV4-60 with immune cells

| Gene  | Immune cell                    | correlation  | pvalue      | Gene | Immune cell                    | correlation  |
|-------|--------------------------------|--------------|-------------|------|--------------------------------|--------------|
| LAMP3 | Activated B cell               | 0.445558255  | 0.048971573 | CD83 | Activated B cell               | 0.495042594  |
| LAMP3 | Activated CD4 T cell           | 0.514828595  | 0.020191374 | CD83 | Activated CD4 T cell           | 0.342337069  |
| LAMP3 | Activated CD8 T cell           | 0.58911245   | 0.006273109 | CD83 | Activated CD8 T cell           | 0.509101408  |
| LAMP3 | Activated dendritic cell       | -0.149617028 | 0.528966863 | CD83 | Activated dendritic cell       | -0.04988285  |
| LAMP3 | CD56bright natural killer cell | -0.2752404   | 0.240189816 | CD83 | CD56bright natural killer cell | -0.15543596  |
| LAMP3 | CD56dim natural killer cell    | -0.184149861 | 0.437042    | CD83 | CD56dim natural killer cell    | -0.020536942 |
| LAMP3 | Central memory CD4 T cell      | 0.611183855  | 0.004196445 | CD83 | Central memory CD4 T cell      | 0.647100061  |
| LAMP3 | Central memory CD8 T cell      | 0.019331283  | 0.935527345 | CD83 | Central memory CD8 T cell      | -0.183922995 |
| LAMP3 | Effector memory CD4 T cell     | -0.29720531  | 0.203177545 | CD83 | Effector memory CD4 T cell     | -0.274378585 |
| LAMP3 | Effector memory CD8 T cell     | 0.072663719  | 0.76079235  | CD83 | Effector memory CD8 T cell     | 0.232956825  |
| LAMP3 | Eosinophil                     | -0.249797967 | 0.288165717 | CD83 | Eosinophil                     | 0.20394147   |
| LAMP3 | Gamma delta T cell             | -0.588199949 | 0.006374421 | CD83 | Gamma delta T cell             | -0.602699846 |
| LAMP3 | Immature B cell                | 0.527833926  | 0.016755606 | CD83 | Immature B cell                | 0.545875745  |
| LAMP3 | Immature dendritic cell        | -0.049607475 | 0.835468134 | CD83 | Immature dendritic cell        | 0.081992163  |
| LAMP3 | Macrophage                     | -0.662576923 | 0.001455737 | CD83 | Macrophage                     | -0.710725427 |
| LAMP3 | Mast cell                      | -0.13446903  | 0.571924297 | CD83 | Mast cell                      | -0.035451846 |
| LAMP3 | Memory B cell                  | 0.396688311  | 0.083329115 | CD83 | Memory B cell                  | 0.173586284  |
| LAMP3 | Monocyte                       | -0.588420971 | 0.006349759 | CD83 | Monocyte                       | -0.537507798 |
| LAMP3 | Natural killer cell            | -0.307589021 | 0.187081187 | CD83 | Natural killer cell            | -0.389892931 |
| LAMP3 | Natural killer T cell          | -0.129632385 | 0.585951414 | CD83 | Natural killer T cell          | -0.27384573  |
| LAMP3 | Neutrophil                     | -0.045585311 | 0.848654434 | CD83 | Neutrophil                     | 0.142539836  |
| LAMP3 | Plasmacytoid dendritic cell    | -0.484623546 | 0.03034618  | CD83 | Plasmacytoid dendritic cell    | -0.19433895  |
| LAMP3 | Regulatory T cell              | -0.370456451 | 0.107863697 | CD83 | Regulatory T cell              | -0.575141671 |
| LAMP3 | T follicular helper cell       | -0.462751205 | 0.039922093 | CD83 | T follicular helper cell       | -0.579507667 |
| LAMP3 | Type 1 T helper cell           | -0.271852743 | 0.24626037  | CD83 | Type 1 T helper cell           | -0.342365242 |
| LAMP3 | Type 17 T helper cell          | -0.232582384 | 0.323747453 | CD83 | Type 17 T helper cell          | -0.1084802   |
| LAMP3 | Type 2 T helper cell           | 0.126105044  | 0.596272266 | CD83 | Type 2 T helper cell           | -0.180157208 |

| pvalue      | Gene     | Immune cell                    | correlation  | pvalue      | Gene    |
|-------------|----------|--------------------------------|--------------|-------------|---------|
| 0.026470783 | PDCD1LG2 | Activated B cell               | 0.314199158  | 0.177295448 | IGKV5-2 |
| 0.139549497 | PDCD1LG2 | Activated CD4 T cell           | 0.329838871  | 0.155545061 | IGKV5-2 |
| 0.021872041 | PDCD1LG2 | Activated CD8 T cell           | 0.273583211  | 0.243147281 | IGKV5-2 |
| 0.834566845 | PDCD1LG2 | Activated dendritic cell       | -0.199508569 | 0.39905748  | IGKV5-2 |
| 0.512875216 | PDCD1LG2 | CD56bright natural killer cell | -0.420308047 | 0.065011409 | IGKV5-2 |
| 0.931515071 | PDCD1LG2 | CD56dim natural killer cell    | -0.453115275 | 0.044818267 | IGKV5-2 |
| 0.002042696 | PDCD1LG2 | Central memory CD4 T cell      | 0.215172346  | 0.362265933 | IGKV5-2 |
| 0.437616914 | PDCD1LG2 | Central memory CD8 T cell      | -0.324214037 | 0.163142808 | IGKV5-2 |
| 0.24172493  | PDCD1LG2 | Effector memeory CD4 T cell    | -0.346137992 | 0.134923329 | IGKV5-2 |
| 0.322946895 | PDCD1LG2 | Effector memeory CD8 T cell    | 0.303456547  | 0.193380594 | IGKV5-2 |
| 0.388443112 | PDCD1LG2 | Eosinophil                     | -0.386858478 | 0.091983098 | IGKV5-2 |
| 0.004914307 | PDCD1LG2 | Gamma delta T cell             | -0.6048342   | 0.004724827 | IGKV5-2 |
| 0.012781446 | PDCD1LG2 | Immature B cell                | 0.524440292  | 0.017603229 | IGKV5-2 |
| 0.731110162 | PDCD1LG2 | Immature dendritic cell        | -0.377051991 | 0.101256041 | IGKV5-2 |
| 0.000444294 | PDCD1LG2 | Macrophage                     | -0.555680558 | 0.010964781 | IGKV5-2 |
| 0.882040689 | PDCD1LG2 | Mast cell                      | -0.274895934 | 0.240802645 | IGKV5-2 |
| 0.46422928  | PDCD1LG2 | Memory B cell                  | 0.178117919  | 0.452462385 | IGKV5-2 |
| 0.014517432 | PDCD1LG2 | Monocyte                       | -0.703063709 | 0.000544793 | IGKV5-2 |
| 0.089244259 | PDCD1LG2 | Natural killer cell            | -0.406305115 | 0.075460446 | IGKV5-2 |
| 0.242677231 | PDCD1LG2 | Natural killer T cell          | -0.334616298 | 0.149287542 | IGKV5-2 |
| 0.548848715 | PDCD1LG2 | Neutrophil                     | 0.061508982  | 0.796709432 | IGKV5-2 |
| 0.411634818 | PDCD1LG2 | Plasmacytoid dendritic cell    | -0.482506624 | 0.031185322 | IGKV5-2 |
| 0.007977544 | PDCD1LG2 | Regulatory T cell              | -0.181723478 | 0.44321141  | IGKV5-2 |
| 0.007408554 | PDCD1LG2 | T follicular helper cell       | -0.496073226 | 0.026109731 | IGKV5-2 |
| 0.139514802 | PDCD1LG2 | Type 1 T helper cell           | -0.37355922  | 0.104717487 | IGKV5-2 |
| 0.648930819 | PDCD1LG2 | Type 17 T helper cell          | -0.31673311  | 0.173638288 | IGKV5-2 |
| 0.447217878 | PDCD1LG2 | Type 2 T helper cell           | 0.048150703  | 0.840239337 | IGKV5-2 |

| Immune cell                    | correlation  | pvalue      |
|--------------------------------|--------------|-------------|
| Activated B cell               | 0.576064757  | 0.007854363 |
| Activated CD4 T cell           | 0.719294828  | 0.000350999 |
| Activated CD8 T cell           | 0.578868333  | 0.007489735 |
| Activated dendritic cell       | -0.527175858 | 0.016917362 |
| CD56bright natural killer cell | -0.465176295 | 0.03875776  |
| CD56dim natural killer cell    | -0.285426784 | 0.222520942 |
| Central memory CD4 T cell      | 0.270853965  | 0.24806872  |
| Central memory CD8 T cell      | -0.486042084 | 0.029793857 |
| Effector memory CD4 T cell     | -0.21479054  | 0.363138878 |
| Effector memory CD8 T cell     | 0.119772901  | 0.614986701 |
| Eosinophil                     | -0.346003977 | 0.135084575 |
| Gamma delta T cell             | -0.347245683 | 0.13359576  |
| Immature B cell                | 0.467151187  | 0.03782918  |
| Immature dendritic cell        | -0.277481663 | 0.236226995 |
| Macrophage                     | -0.530292541 | 0.016162198 |
| Mast cell                      | -0.42305748  | 0.063094742 |
| Memory B cell                  | 0.61559489   | 0.003858957 |
| Monocyte                       | -0.581688557 | 0.00713703  |
| Natural killer cell            | -0.44693878  | 0.048191642 |
| Natural killer T cell          | -0.423596837 | 0.062723807 |
| Neutrophil                     | -0.324399415 | 0.162888411 |
| Plasmacytoid dendritic cell    | -0.382340284 | 0.096174688 |
| Regulatory T cell              | -0.187654182 | 0.428212147 |
| T follicular helper cell       | -0.204994444 | 0.385945136 |
| Type 1 T helper cell           | 0.134021838  | 0.573215089 |
| Type 17 T helper cell          | -0.242365375 | 0.303219742 |
| Type 2 T helper cell           | 0.406129593  | 0.075598904 |

| Gene     | Immune cell                    | correlation  |
|----------|--------------------------------|--------------|
| IGLV3-19 | Activated B cell               | 0.709955536  |
| IGLV3-19 | Activated CD4 T cell           | 0.669400472  |
| IGLV3-19 | Activated CD8 T cell           | 0.645130495  |
| IGLV3-19 | Activated dendritic cell       | -0.543400554 |
| IGLV3-19 | CD56bright natural killer cell | -0.368453249 |
| IGLV3-19 | CD56dim natural killer cell    | -0.054178894 |
| IGLV3-19 | Central memory CD4 T cell      | 0.539099769  |
| IGLV3-19 | Central memory CD8 T cell      | -0.473887372 |
| IGLV3-19 | Effector memory CD4 T cell     | -0.390349894 |
| IGLV3-19 | Effector memory CD8 T cell     | 0.093063332  |
| IGLV3-19 | Eosinophil                     | -0.267409867 |
| IGLV3-19 | Gamma delta T cell             | -0.612957111 |
| IGLV3-19 | Immature B cell                | 0.677093437  |
| IGLV3-19 | Immature dendritic cell        | -0.276201661 |
| IGLV3-19 | Macrophage                     | -0.777398807 |
| IGLV3-19 | Mast cell                      | -0.352920069 |
| IGLV3-19 | Memory B cell                  | 0.462598781  |
| IGLV3-19 | Monocyte                       | -0.649843506 |
| IGLV3-19 | Natural killer cell            | -0.511852528 |
| IGLV3-19 | Natural killer T cell          | -0.386174597 |
| IGLV3-19 | Neutrophil                     | -0.228953735 |
| IGLV3-19 | Plasmacytoid dendritic cell    | -0.377356713 |
| IGLV3-19 | Regulatory T cell              | -0.484618784 |
| IGLV3-19 | T follicular helper cell       | -0.43382294  |
| IGLV3-19 | Type 1 T helper cell           | -0.122375137 |
| IGLV3-19 | Type 17 T helper cell          | -0.220841425 |
| IGLV3-19 | Type 2 T helper cell           | 0.126560657  |

| pvalue      | Gene     | Immune cell                    | correlation  | pvalue      | Gene      |
|-------------|----------|--------------------------------|--------------|-------------|-----------|
| 0.000453623 | IGLV4-60 | Activated B cell               | 0.673688417  | 0.001127986 | IGKV3D-20 |
| 0.001246196 | IGLV4-60 | Activated CD4 T cell           | 0.653249309  | 0.00178942  | IGKV3D-20 |
| 0.002129895 | IGLV4-60 | Activated CD8 T cell           | 0.688870134  | 0.000782322 | IGKV3D-20 |
| 0.013276481 | IGLV4-60 | Activated dendritic cell       | -0.298004612 | 0.201906825 | IGKV3D-20 |
| 0.109930909 | IGLV4-60 | CD56bright natural killer cell | -0.340263026 | 0.142120337 | IGKV3D-20 |
| 0.820532489 | IGLV4-60 | CD56dim natural killer cell    | -0.207861117 | 0.379190108 | IGKV3D-20 |
| 0.01417334  | IGLV4-60 | Central memory CD4 T cell      | 0.610580919  | 0.004244416 | IGKV3D-20 |
| 0.034791242 | IGLV4-60 | Central memory CD8 T cell      | -0.302691965 | 0.194561505 | IGKV3D-20 |
| 0.088837069 | IGLV4-60 | Effector memory CD4 T cell     | -0.279170641 | 0.23326876  | IGKV3D-20 |
| 0.69635741  | IGLV4-60 | Effector memory CD8 T cell     | 0.10814155   | 0.649959545 | IGKV3D-20 |
| 0.254369431 | IGLV4-60 | Eosinophil                     | -0.183095175 | 0.439718113 | IGKV3D-20 |
| 0.004057953 | IGLV4-60 | Gamma delta T cell             | -0.529090594 | 0.016450156 | IGKV3D-20 |
| 0.00104098  | IGLV4-60 | Immature B cell                | 0.643561731  | 0.002201556 | IGKV3D-20 |
| 0.238484985 | IGLV4-60 | Immature dendritic cell        | -0.042134882 | 0.859997414 | IGKV3D-20 |
| 5.50E-05    | IGLV4-60 | Macrophage                     | -0.687033797 | 0.000818644 | IGKV3D-20 |
| 0.126939599 | IGLV4-60 | Mast cell                      | -0.303761193 | 0.192911407 | IGKV3D-20 |
| 0.03999617  | IGLV4-60 | Memory B cell                  | 0.467661531  | 0.037592052 | IGKV3D-20 |
| 0.001926226 | IGLV4-60 | Monocyte                       | -0.594528347 | 0.00569864  | IGKV3D-20 |
| 0.021051375 | IGLV4-60 | Natural killer cell            | -0.42156708  | 0.064128352 | IGKV3D-20 |
| 0.092608778 | IGLV4-60 | Natural killer T cell          | -0.39773066  | 0.082448097 | IGKV3D-20 |
| 0.33156661  | IGLV4-60 | Neutrophil                     | -0.061692773 | 0.796114234 | IGKV3D-20 |
| 0.10095805  | IGLV4-60 | Plasmacytoid dendritic cell    | -0.304419311 | 0.191900442 | IGKV3D-20 |
| 0.030348048 | IGLV4-60 | Regulatory T cell              | -0.358803104 | 0.120291197 | IGKV3D-20 |
| 0.055998012 | IGLV4-60 | T follicular helper cell       | -0.507219674 | 0.02244785  | IGKV3D-20 |
| 0.607267268 | IGLV4-60 | Type 1 T helper cell           | -0.092239946 | 0.698923058 | IGKV3D-20 |
| 0.349446214 | IGLV4-60 | Type 17 T helper cell          | -0.236063311 | 0.316350765 | IGKV3D-20 |
| 0.594934914 | IGLV4-60 | Type 2 T helper cell           | 0.165180484  | 0.486461072 | IGKV3D-20 |



| Immune cell                    | correlation  | pvalue      |
|--------------------------------|--------------|-------------|
| Activated B cell               | 0.544963912  | 0.012962047 |
| Activated CD4 T cell           | 0.544718485  | 0.013011007 |
| Activated CD8 T cell           | 0.390721218  | 0.088507198 |
| Activated dendritic cell       | -0.718070884 | 0.000363202 |
| CD56bright natural killer cell | -0.295174162 | 0.206430537 |
| CD56dim natural killer cell    | -0.36149603  | 0.117332534 |
| Central memory CD4 T cell      | 0.148015671  | 0.533436028 |
| Central memory CD8 T cell      | -0.553292247 | 0.011386705 |
| Effector memory CD4 T cell     | -0.353383155 | 0.126407    |
| Effector memory CD8 T cell     | -0.024158286 | 0.919473641 |
| Eosinophil                     | -0.370659245 | 0.107656    |
| Gamma delta T cell             | -0.420553184 | 0.064838762 |
| Immature B cell                | 0.471781482  | 0.035719772 |
| Immature dendritic cell        | -0.313251968 | 0.178675848 |
| Macrophage                     | -0.444653139 | 0.049488146 |
| Mast cell                      | -0.287526591 | 0.218987419 |
| Memory B cell                  | 0.559870395  | 0.01025526  |
| Monocyte                       | -0.454684377 | 0.043990982 |
| Natural killer cell            | -0.521167396 | 0.01845285  |
| Natural killer T cell          | -0.556419687 | 0.010836805 |
| Neutrophil                     | -0.42143629  | 0.064219662 |
| Plasmacytoid dendritic cell    | -0.501033342 | 0.02442609  |
| Regulatory T cell              | -0.213815873 | 0.365372761 |
| T follicular helper cell       | -0.327441722 | 0.158752405 |
| Type 1 T helper cell           | -0.076968205 | 0.747053138 |
| Type 17 T helper cell          | -0.164240453 | 0.488979501 |
| Type 2 T helper cell           | 0.181608181  | 0.443505697 |

| Gene      | Immune cell                    | correlation  |
|-----------|--------------------------------|--------------|
| IGKV2D-30 | Activated B cell               | 0.709576268  |
| IGKV2D-30 | Activated CD4 T cell           | 0.459088413  |
| IGKV2D-30 | Activated CD8 T cell           | 0.42381629   |
| IGKV2D-30 | Activated dendritic cell       | -0.429073106 |
| IGKV2D-30 | CD56bright natural killer cell | -0.374467903 |
| IGKV2D-30 | CD56dim natural killer cell    | -0.277294012 |
| IGKV2D-30 | Central memory CD4 T cell      | 0.351053883  |
| IGKV2D-30 | Central memory CD8 T cell      | -0.436571784 |
| IGKV2D-30 | Effector memory CD4 T cell     | -0.675860974 |
| IGKV2D-30 | Effector memory CD8 T cell     | 0.015646569  |
| IGKV2D-30 | Eosinophil                     | -0.327404435 |
| IGKV2D-30 | Gamma delta T cell             | -0.85621065  |
| IGKV2D-30 | Immature B cell                | 0.773312857  |
| IGKV2D-30 | Immature dendritic cell        | -0.50390773  |
| IGKV2D-30 | Macrophage                     | -0.837535681 |
| IGKV2D-30 | Mast cell                      | -0.289936246 |
| IGKV2D-30 | Memory B cell                  | 0.357791898  |
| IGKV2D-30 | Monocyte                       | -0.853294144 |
| IGKV2D-30 | Natural killer cell            | -0.704692785 |
| IGKV2D-30 | Natural killer T cell          | -0.535401944 |
| IGKV2D-30 | Neutrophil                     | -0.113193968 |
| IGKV2D-30 | Plasmacytoid dendritic cell    | -0.596008442 |
| IGKV2D-30 | Regulatory T cell              | -0.482221506 |
| IGKV2D-30 | T follicular helper cell       | -0.526904144 |
| IGKV2D-30 | Type 1 T helper cell           | -0.434323113 |
| IGKV2D-30 | Type 17 T helper cell          | -0.211285883 |
| IGKV2D-30 | Type 2 T helper cell           | -0.12037614  |

pvalue  
0.000458277  
0.041731814  
0.062573354  
0.059050189  
0.103808814  
0.236557154  
0.129102086  
0.054287325  
0.001071794  
0.947798477  
0.158802652  
1.46E-06  
6.37E-05  
0.023490462  
4.09E-06  
0.214978094  
0.121415846  
1.73E-06  
0.000521948  
0.014982888  
0.634675924  
0.005549412  
0.031299717  
0.016984513  
0.055683729  
0.371207825  
0.613193705
